# Supplementary material for: Predicting the performance and stability parameters of energetic materials (EMs) using a machine learning-based q-RASPR approach
Source: Royal Society of Chemistry journal article supplement (doi:10.1039/d4ya00215f), 2024-01-01
Supplement: d4ya00215f1.xlsx [file d4ya00215f1.xlsx]

## Sheet: SI-1
				Supplementary Materials SI-1
		Predicting performance and stability parameters of energetic materials (EMs) using the ML-based q-RASPR approach
							Shubham Kumar Pandey and Kunal Roy*
				Drug Theoretics and Cheminformatics Laboratory
				Department of Pharmaceutical Technology
				Jadavpur University
				Kolkata 700032, India
				Email: kunal.roy@jadavpuruniversity.in
*Corresponding author
Prof. Kunal Roy, Phone: +91 98315 94140;
Fax: +91-33-2837-1078
Email: kunalroy_in@yahoo.com; kunal.roy@jadavpuruniversity.in

## Sheet: Decomposition temperature
ID	Smiles	Tdec
1	O=[N+]([O-])c1n[nH]c2c([N+](=O)[O-])n[nH]c12	603.15
2	[N-]=[N+]=Nc1n[nH]nc1-c1nnn[nH]1	425.15
3	n1n[nH]c(-c2n[nH]nc2-c2nnn[nH]2)n1	550.15
4	[O]~n1nc2nonc2[nH]1	362.15
5	O=C(CO[N+](=O)[O-])CO[N+](=O)[O-]	388.15
6	O=[N+]([O-])OCC1(O[N+](=O)[O-])COC(CO[N+](=O)[O-])(O[N+](=O)[O-])CO1	318.15
7	O=[N+]([O-])OCC(CO[N+](=O)[O-])(CO[N+](=O)[O-])CO[N+](=O)[O-]	475.15
8	O=[N+]([O-])OCC(CO[N+](=O)[O-])O[N+](=O)[O-]	458.15
9	O=[N+]([O-])c1cc([N+](=O)[O-])c(/C=C/c2c([N+](=O)[O-])cc([N+](=O)[O-])cc2[N+](=O)[O-])c([N+](=O)[O-])c1	593.15
10	O=[N+]([O-])N1CN([N+](=O)[O-])CN([N+](=O)[O-])C1	483.15
11	O=[N+]([O-])N1C2C3N([N+](=O)[O-])C1C1N([N+](=O)[O-])C(C(N1[N+](=O)[O-])N3[N+](=O)[O-])N2[N+](=O)[O-]	468.15
12	O=[N+]([O-])c1nn(Cn2nc([N+](=O)[O-])c([N+](=O)[O-])c2[N+](=O)[O-])c([N+](=O)[O-])c1[N+](=O)[O-]	478.15
13	N#[N+]c1c([O-])cc([N+](=O)[O-])cc1[N+](=O)[O-]	430.15
14	NC(=O)CCC([N+](=O)[O-])([N+](=O)[O-])[N+](=O)[O-]	393.15
15	O=C(O)CCC([N+](=O)[O-])([N+](=O)[O-])[N+](=O)[O-]	449.15
16	[N-]=[N+]=NC(=O)CCC([N+](=O)[O-])([N+](=O)[O-])[N+](=O)[O-]	358.15
17	O=C(CCC([N+](=O)[O-])([N+](=O)[O-])[N+](=O)[O-])NCC([N+](=O)[O-])([N+](=O)[O-])[N+](=O)[O-]	428.15
18	O=C(CCC([N+](=O)[O-])([N+](=O)[O-])[N+](=O)[O-])OCC([N+](=O)[O-])([N+](=O)[O-])[N+](=O)[O-]	428.15
19	CC1(OO)CCC(C)(OO)OO1	397.15
20	CC1(OO)OOC(C)(OO)C1(C)C	337.15
21	CC1(O)OOC(C)(OO)C1(C)C	340.15
22	CCC1(OO)CC(CC)(OO)OO1	402.15
23	CCC1(O)CC(CC)(OO)OO1	368.15
24	CC1C(C)(OO)OOC1(C)OO	369.15
25	CC1(OO)CC(C)(OO)OO1	391.15
26	CC1(O)CC(C)(OO)OO1	406.15
27	CN(CC#N)[N+](=O)[O-]	466.15
28	CN(CC(=O)O)[N+](=O)[O-]	426.15
29	CN(CC(=O)NNCC([N+](=O)[O-])([N+](=O)[O-])[N+](=O)[O-])[N+](=O)[O-]	381.15
30	CN(CC(=O)NNC(=O)CN(C)[N+](=O)[O-])[N+](=O)[O-]	474.15
31	CN(CC(=O)OCC([N+](=O)[O-])([N+](=O)[O-])[N+](=O)[O-])[N+](=O)[O-]	451.15
32	CN(CC(N)=O)[N+](=O)[O-]	459.15
33	CN(CC(=O)NC(=O)OCC([N+](=O)[O-])([N+](=O)[O-])[N+](=O)[O-])[N+](=O)[O-]	423.15
34	CN(CC(=O)N[N+](=O)[O-])[N+](=O)[O-]	386.15
35	O=C(O)CCN(CC([N+](=O)[O-])([N+](=O)[O-])[N+](=O)[O-])[N+](=O)[O-]	419.15
36	O=C(CCN(CC([N+](=O)[O-])([N+](=O)[O-])[N+](=O)[O-])[N+](=O)[O-])OCC([N+](=O)[O-])([N+](=O)[O-])[N+](=O)[O-]	437.15
37	O=C(OCC([N+](=O)[O-])([N+](=O)[O-])[N+](=O)[O-])N(CCN(CC([N+](=O)[O-])([N+](=O)[O-])[N+](=O)[O-])[N+](=O)[O-])[N+](=O)[O-]	430.15
38	O=C(O)CC(C(=O)O)N(CC([N+](=O)[O-])([N+](=O)[O-])[N+](=O)[O-])[N+](=O)[O-]	433.15
39	O=C(OCCC([N+](=O)[O-])([N+](=O)[O-])[N+](=O)[O-])C(=O)OCC([N+](=O)[O-])([N+](=O)[O-])[N+](=O)[O-]	441.15
40	O=C(NC(=O)OCC([N+](=O)[O-])([N+](=O)[O-])[N+](=O)[O-])OCC([N+](=O)[O-])([N+](=O)[O-])[N+](=O)[O-]	456.15
41	O=C(CCC([N+](=O)[O-])([N+](=O)[O-])[N+](=O)[O-])NC(=O)OCC([N+](=O)[O-])([N+](=O)[O-])[N+](=O)[O-]	456.15
42	CC(NC(=O)NC(C)C([N+](=O)[O-])([N+](=O)[O-])[N+](=O)[O-])C([N+](=O)[O-])([N+](=O)[O-])[N+](=O)[O-]	433.15
43	CC(OC(N)=O)C([N+](=O)[O-])([N+](=O)[O-])[N+](=O)[O-]	425.15
44	CC(OC(=O)N[N+](=O)[O-])C([N+](=O)[O-])([N+](=O)[O-])[N+](=O)[O-]	407.15
45	NC(=O)OCC([N+](=O)[O-])([N+](=O)[O-])[N+](=O)[O-]	442.15
46	O=C(N[N+](=O)[O-])OCC([N+](=O)[O-])([N+](=O)[O-])[N+](=O)[O-]	426.15
47	NC(=O)OCCC([N+](=O)[O-])([N+](=O)[O-])[N+](=O)[O-]	425.15
48	O=C(N[N+](=O)[O-])OCCC([N+](=O)[O-])([N+](=O)[O-])[N+](=O)[O-]	407.15
49	O=C(N[N+](=O)[O-])OCC(COC(=O)N[N+](=O)[O-])(COC(=O)N[N+](=O)[O-])COC(=O)N[N+](=O)[O-]	469.15
50	Nc1n[nH]nc1-c1nnn[nH]1	514.15
51	O=[N+]([O-])c1n[nH]nc1-c1nnn[nH]1	461.15
52	O=[N+]([O-])c1cc([N+](=O)[O-])c(Nc2ncn[nH]2)c([N+](=O)[O-])c1	589.15
53	Nc1nnc(Nc2c([N+](=O)[O-])cc([N+](=O)[O-])cc2[N+](=O)[O-])[nH]1	534.15
54	O=C(N[N+](=O)[O-])OCC(OC(=O)N[N+](=O)[O-])C(COC(=O)N[N+](=O)[O-])OC(=O)N[N+](=O)[O-]	454.15
55	O=C(N[N+](=O)[O-])OC1C(OC(=O)N[N+](=O)[O-])C(OC(=O)N[N+](=O)[O-])C(OC(=O)N[N+](=O)[O-])C(OC(=O)N[N+](=O)[O-])C1OC(=O)N[N+](=O)[O-]	454.15
56	O=C(N[N+](=O)[O-])OCC(OC(=O)N[N+](=O)[O-])C(OC(=O)N[N+](=O)[O-])C(OC(=O)N[N+](=O)[O-])C(COC(=O)N[N+](=O)[O-])OC(=O)N[N+](=O)[O-]	415.15
57	O=[N+]([O-])OCC(O[N+](=O)[O-])C(CO[N+](=O)[O-])O[N+](=O)[O-]	436.15
58	O=C(OO)c1ccc(C(=O)OO)cc1	433.15
59	O=C(OO)c1ccc([N+](=O)[O-])cc1	414.15
60	O=C(OO)c1cc([N+](=O)[O-])cc([N+](=O)[O-])c1	405.15
61	O=C(N[N+](=O)[O-])OCCOC(=O)N[N+](=O)[O-]	430.15
62	O=C(N[N+](=O)[O-])OCC#CCOC(=O)N[N+](=O)[O-]	422.15
63	On1nnnc1-c1n[nH]nc1-c1nnnn1O	519.15
64	O=[N+]([O-])OC(O[N+](=O)[O-])C(O[N+](=O)[O-])O[N+](=O)[O-]	363.15
65	O=[N+]([O-])c1cc([N+](=O)[O-])c2[nH]nnc2c1	564.15
66	O=[N+]([O-])c1cc([N+](=O)[O-])c2[nH+]nn([O-])c2c1	455.15
67	CN(Cn1nnc2cc([N+](=O)[O-])cc([N+](=O)[O-])c21)[N+](=O)[O-]	452.15
68	O=[N+]([O-])Nc1nonc1[N+](=O)[O-]	338.15
69	Nc1c([N+](=O)[O-])cc([N+](=O)[O-])c2[nH]nnc12	614.15
70	Nc1c([N+](=O)[O-])c(N)c2nn[nH]c2c1[N+](=O)[O-]	595.15
71	Nc1c([N+](=O)[O-])cc([N+](=O)[O-])c2[nH+]nn([O-])c12	493.15
72	O=C(NCCC([N+](=O)[O-])([N+](=O)[O-])[N+](=O)[O-])C(=O)NCCC([N+](=O)[O-])([N+](=O)[O-])[N+](=O)[O-]	454.15
73	O=[N+]([O-])C(CNCC([N+](=O)[O-])([N+](=O)[O-])[N+](=O)[O-])([N+](=O)[O-])[N+](=O)[O-]	387.15
74	O=[N+]([O-])N(CCC([N+](=O)[O-])([N+](=O)[O-])[N+](=O)[O-])CC([N+](=O)[O-])([N+](=O)[O-])[N+](=O)[O-]	426.15
75	CCC1C2(C)OOC1(C)OO2	381.15
76	CCC1(CC)C2(C)OOC1(C)OO2	389.15
77	CC12CC(C)(OO1)OO2	394.15
78	O=[N+]([O-])/N=c1\[nH]nnn1N[N+](=O)[O-]	383.15
79	Nn1cc[n+]([O-])n1	483.15
80	N#[N+]c1cc([N+](=O)[O-])c([O-])c([N+](=O)[O-])c1	441.15
81	N#[N+]c1cc([N+](=O)[O-])c(O)c([N+](=O)[O-])c1[O-]	443.15
82	NC(=O)OCC(COC(N)=O)([N+](=O)[O-])[N+](=O)[O-]	455.15
83	O=C(N[N+](=O)[O-])OCC(COC(=O)N[N+](=O)[O-])([N+](=O)[O-])[N+](=O)[O-]	431.15
84	CC(COC(N)=O)([N+](=O)[O-])[N+](=O)[O-]	465.15
85	CC(COC(=O)N[N+](=O)[O-])([N+](=O)[O-])[N+](=O)[O-]	413.15
86	NC(=O)OCCCC([N+](=O)[O-])([N+](=O)[O-])[N+](=O)[O-]	429.15
87	O=C(N[N+](=O)[O-])OCCCC([N+](=O)[O-])([N+](=O)[O-])[N+](=O)[O-]	418.15
88	Nc1nn2c(N)nnc2n1N	518.15
89	O=[N+]([O-])OC12CC3(O[N+](=O)[O-])CC(O[N+](=O)[O-])(C1)CC(O[N+](=O)[O-])(C2)C3	446.15
90	NNC(=O)CCCCC(=O)NN	556.05
91	NNC(=O)c1ccc(N)cc1	568.15
92	Nc1nc(O)cc(=O)[nH]1	599.15
93	Cc1cc(N)no1	527.15
94	COc1ccc([N+](=O)[O-])cc1N	582.15
95	Nc1ccc([N+](=O)[O-])cc1O	486.15
96	N#CCC(N)=C(C#N)C#N	528.15
97	Nn1cnnc1	536.15
98	O=c1cn[nH]c(=O)[nH]1	636.15
99	c1ccc(N=Nc2ccccc2)cc1	594.15
100	N#CC1(N=NC2(C#N)CCCCC2)CCCCC1	391.15
101	NC(=O)N=NC(N)=O	482.15
102	C(=NN=Cc1ccccc1)c1ccccc1	579.15
103	O=C(OOC(=O)c1ccccc1)c1ccccc1	381.15
104	O=C(O)CCC(=O)c1ccccc1	580.15
105	O=[N+]([O-])c1ccc(NCc2ccccc2)c2nonc12	541.15
106	ON=C(C(=NO)c1ccccc1)c1ccccc1	511.15
107	CN(C)c1cccc2cccc(N(C)C)c12	706.15
108	NC(=O)NC(N)=O	519.15
109	CC(C)(C)OC(=O)NN	513.15
110	CC(C)(C)OO	371.15
111	CC(C)(C)OOC(=O)C(C)(C)C	341.15
112	O=C1CCCCCN1	654.15
113	NNC(=O)NN	511.15
114	O=CC=Cc1ccccc1	612.15
115	Cc1cccc(N(O)C(=O)C=Cc2ccccc2)c1C	450.15
116	OCC=Cc1ccccc1	603.15
117	CC=CC(=O)O	634.05
118	CC(C)(OO)c1ccccc1	460.15
119	N#CCC(=O)O	439.65
120	C=CCNCC=C	587.45
121	N#CC(N)=C(N)C#N	460.15
122	CC(C)(C)OOC(C)(C)C	435.15
123	N#CN=C(N)N	498.45
124	O=CNNC=O	507.15
125	CC(=O)c1cc(O)ccc1O	617.15
126	CC(=O)c1cc(O)cc(O)c1	605.15
127	C=CCc1ccc(OC)c(OC)c1	648.15
128	COc1ccc(CC(C)=O)cc1OC	678.15
129	COc1ccc(CC#N)cc1OC	683.15
130	CN(C)c1ccc(C=CC=O)cc1	623.15
131	CC(=NO)C(C)=NO	527.15
132	CC(C)(CCC(C)(C)OO)OO	413.15
133	CCC(C)(O)C#CC(C)(O)CC	661.65
134	O=C(NCO)NCO	536.55
135	Cc1cc(=O)cc(C)o1	581.65
136	Nc1ccc([N+](=O)[O-])cc1[N+](=O)[O-]	619.15
137	Nc1c([N+](=O)[O-])cccc1[N+](=O)[O-]	644.15
138	O=C(O)c1ccc([N+](=O)[O-])c([N+](=O)[O-])c1	618.15
139	O=C(O)c1cc([N+](=O)[O-])cc([N+](=O)[O-])c1	647.15
140	N#Cc1cc([N+](=O)[O-])cc([N+](=O)[O-])c1	682.15
141	O=[N+]([O-])c1ccc(CO)cc1[N+](=O)[O-]	542.15
142	O=[N+]([O-])c1ccc(Nc2ccccc2)c([N+](=O)[O-])c1	621.15
143	Cc1ccc([N+](=O)[O-])cc1[N+](=O)[O-]	585.15
144	Cc1ccc([N+](=O)[O-])c([N+](=O)[O-])c1	595.15
145	Cc1c(C(=O)O)cc([N+](=O)[O-])cc1[N+](=O)[O-]	580.15
146	O=C(NNc1ccccc1)NNc1ccccc1	477.15
147	O=[N+]([O-])c1cc([N+](=O)[O-])c(NN(c2ccccc2)c2ccccc2)c([N+](=O)[O-])c1	443.15
148	O=[N+]([O-])c1cc([N+](=O)[O-])c([N]N(c2ccccc2)c2ccccc2)c([N+](=O)[O-])c1	406.15
149	Cc1ccccc1N=C(N)Nc1ccccc1C	464.15
150	OCC1CO1	470.15
151	O=C1c2ccccc2C(=O)N1CC1CO1	573.15
152	CCOc1cc(C=O)ccc1O	624.15
153	CCc1ccc2c(c1)C(=O)c1ccccc1C2=O	720.45
154	CCOC(=O)NN	528.05
155	CCOC(=O)c1cc(O)c(O)c(O)c1	621.15
156	O=C(O)C=CC(=O)O	595.85
157	ON=C(C(=NO)c1ccco1)c1ccco1	498.45
158	O=C(O)CCCC(=O)O	608.95
159	C1N2CN3CN1CN(C2)C3	599.15
160	c1ccc(NNc2ccccc2)cc1	448.15
161	On1nnc2ccccc21	477.15
162	NNCCO	524.15
163	COc1ccc(C=CC(=O)O)cc1O	661.15
164	C=CC(=O)NCO	419.15
165	O=C1C=C(O)c2ccccc2C1=O	475.95
166	NNC(=O)c1cc2ccccc2cc1O	482.75
167	O=[N+]([O-])c1ccc(O)c2ncccc12	546.35
168	Oc1cccnc1	659.05
169	O=c1cc[nH]cc1	693.35
170	NC(=O)NO	414.75
171	OCCNCCO	599.45
172	CC(C)CCON=O	475.15
173	O=Cc1ccncc1	526.75
174	ON=Cc1ccncc1	512.15
175	NNC(=O)c1ccncc1	575.35
176	O=C(C=NO)c1ccccc1	426.15
177	CCCCCCCCCCCC(=O)OOC(=O)CCCCCCCCCCC	359.15
178	O=C1C=CC(=O)O1	553.65
179	Nc1nc(N)nc(N)n1	657.85
180	COc1ccc([N+](=O)[O-])cn1	620.95
181	Cc1ccc2c(c1)C(=O)c1ccccc1C2=O	731.75
182	Cc1ccc2n[nH]nc2c1	600.65
183	CC1C(=O)CCC1=O	571.75
184	CN(N=O)c1ccccc1	471.15
185	CC(C)(C)N=O.CC(C)(C)N=O	420.15
186	C#CC(C)(O)CC	625.75
187	O=C1C=CC(=O)c2ccccc21	536.55
188	O=C(O)c1ccc[n+]([O-])c1	575.15
189	NNC(=O)c1cccnc1	549.95
190	CC(=O)Nc1cccc([N+](=O)[O-])c1	656.15
191	CC(=O)Nc1ccc([N+](=O)[O-])cc1	656.15
192	CC(=O)c1cccc([N+](=O)[O-])c1	600.15
193	CC(=O)c1ccccc1[N+](=O)[O-]	601.15
194	CC(=O)c1ccc([N+](=O)[O-])cc1	586.15
195	Nc1cccc([N+](=O)[O-])c1	620.15
196	Nc1ccccc1[N+](=O)[O-]	614.15
197	Nc1ccc([N+](=O)[O-])cc1	618.15
198	COc1ccc([N+](=O)[O-])cc1	643.15
199	O=Cc1cccc([N+](=O)[O-])c1	535.15
200	O=Cc1ccccc1[N+](=O)[O-]	496.15
201	O=Cc1ccc([N+](=O)[O-])cc1	558.15
202	NC(=O)c1ccccc1[N+](=O)[O-]	631.15
203	NC(=O)c1ccc([N+](=O)[O-])cc1	656.15
204	O=[N+]([O-])c1ccc(N=Nc2ccc(O)cc2O)cc1	476.15
205	NNC(=O)c1cccc([N+](=O)[O-])c1	495.15
206	NNC(=O)c1ccccc1[N+](=O)[O-]	550.15
207	O=[N+]([O-])c1ccc2nc[nH]c2c1	623.35
208	O=C(O)c1cccc([N+](=O)[O-])c1	648.15
209	O=C(O)c1ccccc1[N+](=O)[O-]	578.15
210	COC(=O)c1cccc([N+](=O)[O-])c1	676.15
211	COC(=O)c1ccccc1[N+](=O)[O-]	650.15
212	COC(=O)c1ccc([N+](=O)[O-])cc1	672.15
213	O=[N+]([O-])c1cccc(CO)c1	616.15
214	O=[N+]([O-])c1ccccc1CO	571.15
215	O=[N+]([O-])c1ccc(CO)cc1	583.15
216	O=[N+]([O-])c1ccccc1-c1ccccc1	664.15
217	O=C(O)C=Cc1cccc([N+](=O)[O-])c1	592.15
218	O=C(O)C=Cc1ccccc1[N+](=O)[O-]	571.15
219	O=C(O)C=Cc1ccc([N+](=O)[O-])cc1	583.15
220	Cc1cc(O)ccc1[N+](=O)[O-]	543.15
221	N=C(N)N[N+](=O)[O-]	487.25
222	O=[N+]([O-])c1cccc2ccccc12	666.65
223	CCOc1ccc([N+](=O)[O-])cc1	623.15
224	O=[N+]([O-])c1cccc(O)c1	626.15
225	O=[N+]([O-])c1ccc(O)cc1	575.15
226	O=C(O)Cc1ccccc1[N+](=O)[O-]	516.15
227	O=C(O)Cc1ccc([N+](=O)[O-])cc1	548.15
228	NNc1ccc([N+](=O)[O-])cc1	451.15
229	NNc1ccccc1[N+](=O)[O-]	459.15
230	O=[N+]([O-])c1ccc2ncccc2c1	651.95
231	O=Nc1ccc(O)c2ncccc12	516.15
232	CN(CNC(=O)c1ccccc1)N=O	407.15
233	O=Nc1ccc2ccccc2c1O	428.15
234	Cc1ccc([N+](=O)[O-])cc1	639.15
235	Cc1cc([N+](=O)[O-])ccc1N	602.15
236	O=[N+]([O-])c1ncn[nH]1	473.45
237	COc1cc(C=O)cc([N+](=O)[O-])c1O	471.15
238	NNC(=O)C(=O)NN	520.65
239	Oc1ccccc1	522.15
240	O=C(Cc1ccccc1)NCC=NO	430.15
241	O=C(N=Nc1ccccc1)NNc1ccccc1	435.15
242	NNc1ccccc1	568.15
243	NC(=O)NNc1ccccc1	490.15
244	c1ccc2cnncc2c1	578.95
245	O=C(O)c1cccc[n+]1[O-]	580.15
246	O=Cc1ccc2c(c1)OCO2	636.45
247	CCCOC(=O)c1cc(O)c(O)c(O)c1	637.15
248	c1ncc2[nH]cnc2n1	601.85
249	ON=Cc1ccccn1	508.35
250	[O-][n+]1ccccc1	561.15
251	Oc1ccccc1O	640.15
252	CC(=O)C(=O)O	432.15
253	NNC(=O)c1ccccc1O	504.15
254	O=C(NO)c1ccccc1O	448.15
255	c1ccc(C2CO2)cc1	546.15
256	c1nn[nH]n1	479.75
257	Cc1ccc(C(C)C)c(O)c1	575.15
258	CC(=O)Oc1ccc(OC(C)=O)c(OC(C)=O)c1	651.15
259	COc1ccc(C=O)c(OC)c1OC	640.15
260	COc1ccc(C(=O)O)c(OC)c1OC	624.15
261	COc1cc(OC)c(C(=O)O)cc1OC	653.15
262	Cc1c([N+](=O)[O-])cc([N+](=O)[O-])cc1[N+](=O)[O-]	587.15
263	O=C(O)C(CO)c1ccccc1	543.15
264	C=Cc1ccccn1	463.15
265	O=C(O)c1cc(=O)c2cccc(O)c2[nH]1	616.15
266	Cn1c(N)c(N=O)c(=O)n(C)c1=O	496.15
267	c1ccc(N=Nc2ccc(Nc3ccccc3)cc2)cc1	631.15
268	NN=C(c1ccccc1)c1ccccc1	607.15
269	CC1CO1	433.15
270	C=C(C)C(=O)OCC1CO1	428.15
271	COc1ccc(COC(=O)N=[N+]=[N-])cc1	405.15
272	Cc1ccc(C(=O)O)cc1[N+](=O)[O-]	433.15
273	Cc1cccc[n+]1[O-]	564.15
274	Cc1ccc[n+]([O-])c1	433.15
275	[O-][n+]1onc(-c2ncon2)c1-c1ncon1	500.15
276	O=[N+]([O-])N(CN(c1nonc1-c1ncon1)[N+](=O)[O-])c1nonc1-c1ncon1	422.15
277	O=[N+]([O-])N(CCN(c1nonc1-c1ncon1)[N+](=O)[O-])c1nonc1-c1ncon1	448.15
278	O=c1[nH]c(-c2nonc2/N=N/c2nonc2-c2noc(=O)[nH]2)no1	595.15
279	O=c1[nH]c(-c2nonc2/N=[N+](\[O-])c2nonc2-c2noc(=O)[nH]2)no1	580.15
280	O=c1[nH]c(-c2nonc2NNc2nonc2-c2noc(=O)[nH]2)no1	544.15
281	O=[N+]([O-])c1nonc1-c1noc(/N=N/c2nc(-c3nonc3[N+](=O)[O-])no2)n1	529.15
282	O=[N+]([O-])c1nonc1-c1nnc(/N=N/c2nnc(-c3nonc3[N+](=O)[O-])o2)o1	551.15
283	O=[N+]([O-])c1no[n+]([O-])c1-c1noc(/N=N/c2nc(-c3c([N+](=O)[O-])no[n+]3[O-])no2)n1	455.15
284	O=[N+]([O-])Nc1nonc1/N=N/c1nonc1N[N+](=O)[O-]	458.15
285	O=[N+]([O-])Nc1nonc1/N=[N+](\[O-])c1nonc1N[N+](=O)[O-]	343.15
286	O=[N+]([O-])Nc1nonc1-c1nonc1N[N+](=O)[O-]	353.15
287	O=[N+]([O-])Nc1nonc1/[N+]([O-])=N/c1nonc1/N=N/c1nonc1/N=[N+](\[O-])c1nonc1N[N+](=O)[O-]	393.15
288	Nc1nonc1-c1nonc1-c1nonc1[N+](=O)[O-]	571.8
289	Nc1nonc1NNc1nonc1N	465.15
290	[O]~n1onc2c1-c1nonc1N(O)c1nonc1-2	433.75
291	NC(N)=C([N+](=O)[O-])[N+](=O)[O-]	493.15
292	Cc1nonc1N	381.15
293	Cc1nonc1NCNc1nonc1C	512.15
294	Cc1nonc1N(CN(c1nonc1C)[N+](=O)[O-])[N+](=O)[O-]	393.15
295	Nc1nonc1/N=N/c1nonc1N	593.15
296	N#Cc1non(~[O])c1/C(N)=N/[N+](=O)[O-]	435.15
297	Nc1nnc2nonc2c1[N+](=O)[O-]	459.15
298	O=[N+]([O-])c1cc([N+](=O)[O-])c(-n2nc3c(n2)Cc2nn(-c4c([N+](=O)[O-])cc([N+](=O)[O-])cc4[N+](=O)[O-])nc2C3)c([N+](=O)[O-])c1	703.15
299	O=[N+]([O-])C1=CC2C(=NN3C4C=C([N+](=O)[O-])C=C([N+](=O)[O-])C4=NN23)C([N+](=O)[O-])=C1	651.15
300	O=[N+]([O-])c1cc([N+](=O)[O-])c(Nc2nc(Nc3c([N+](=O)[O-])cc([N+](=O)[O-])cc3[N+](=O)[O-])c([N+](=O)[O-])cc2[N+](=O)[O-])c([N+](=O)[O-])c1	658.15
301	Nc1nnc(-c2nonc2N[N+](=O)[O-])n1N	518.15
302	Nc1nnc2nnc(Nc3nc([N+](=O)[O-])no3)nn12	495.15
303	O=[N+]([O-])c1noc(Nc2nnc3nnc([N+](=O)[O-])n3n2)n1	482.95
304	O=[N+]([O-])c1nonc1Nc1nnc2nncn2n1	502.25
305	C(Nc1nonc1-[n+]1nc2no[n-]c-2n1)Nc1nonc1-[n+]1nc2no[n-]c-2n1	517.15
306	O=[N+]([O-])N(CN(c1nonc1-[n+]1nc2no[n-]c-2n1)[N+](=O)[O-])c1nonc1-[n+]1nc2no[n-]c-2n1	433.15
307	N#Cc1c(-c2nonc2N)noc1N	534.15
308	Nc1nonc1-c1nc(N)c2nonc2n1	559.15
309	[N-]=[N+]=N/C(=N\O)c1nc(-c2noc(/C(N=[N+]=[N-])=N/O)n2)no1	451.15
310	On1nnnc1-c1nc(-c2noc(-c3nnnn3O)n2)no1	493.15
311	[N-]=[N+]=N/C(=N\O)c1noc(/C(N=[N+]=[N-])=N/O)n1	432.15
312	O=[N+]([O-])c1nonc1-c1noc(-c2nonc2[N+](=O)[O-])n1	534.15
313	Nc1nc(-c2nonc2[N+](=O)[O-])no1	562.15
314	Cc1cc(C)c(/N=N/c2no[n+]([O-])c2-c2ccccc2)c(C)c1	421.15
315	CC1(C)OC(=O)C(=NNc2no[n+]([O-])c2-c2ccccc2)C(=O)O1	430.65
316	Cc1c(NN=C2C(=O)CC(C)(C)CC2=O)no[n+]1[O-]	428.65
317	CC1(C)CC(=O)C(=NNc2nonc2-c2ccccc2)C(=O)C1	435.65
318	COC(=O)c1c(NN=C2C(=O)CC(C)(C)CC2=O)no[n+]1[O-]	452.15
319	CC(C)(/N=N/c1nonc1N)[N+](=O)[O-]	371.15
320	COC(=O)c1c(/N=N/C(C)(C)[N+](=O)[O-])no[n+]1[O-]	340.15
321	Nc1nonc1Nc1ccc([N+](=O)[O-])c2nonc12	525.18
322	n1onc2c1NC1Nc3nonc3NC1N2	503.15
323	N1=C2Nc3nonc3N=C2Nc2nonc21	418.15
324	Nc1nonc1-c1nnnn1O	464.15
325	[N-]=[N+]=Nc1nonc1-c1nnnn1O	460.65
326	Nc1nc(-c2nonc2N)n[nH]1	575.48
327	O=[N+]([O-])c1nc(-c2nonc2[N+](=O)[O-])n[nH]1	464.3
328	O=[N+]([O-])C(CNc1nc(-c2nonc2NCC([N+](=O)[O-])([N+](=O)[O-])[N+](=O)[O-])n[nH]1)([N+](=O)[O-])[N+](=O)[O-]	441.16
329	O=[N+]([O-])N(CC([N+](=O)[O-])([N+](=O)[O-])[N+](=O)[O-])c1nc(-c2nonc2N(CC([N+](=O)[O-])([N+](=O)[O-])[N+](=O)[O-])[N+](=O)[O-])n[nH]1	364.97
330	O=[N+]([O-])Nc1nc(-c2nonc2N[N+](=O)[O-])n[nH]1	436.35
331	O=[N+]([O-])Nc1nc(-c2nonc2[N+](=O)[O-])n[nH]1	401.85
332	Nc1nonc1-c1nc(N[N+](=O)[O-])n[nH]1	468.65
333	O=[N+]([O-])Nc1n[nH]c(-c2nonc2N[N+](=O)[O-])n1	401.85
334	O=[N+]([O-])c1nonc1-c1c([N+](=O)[O-])no[n+]1[O-]	413.15
335	CCOC(=O)c1nnn(-c2nonc2N)c1C	402.65
336	CCOC(=O)c1nnn(-c2nonc2N)c1-c1ccc([N+](=O)[O-])cc1	406.15
337	Nc1nonc1-n1nnc(C(=O)O)c1-c1ccccc1	457.65
338	CCCCc1c(C(=O)O)nnn1-c1nonc1N	444.15
339	Nc1c([N+](=O)[O-])c(N)c([N+](=O)[O-])c(N)c1[N+](=O)[O-]	623.15
340	O=[N+]([O-])c1cc([N+](=O)[O-])c2n[n+]3c4cc([N+](=O)[O-])cc([N+](=O)[O-])c4[n-]n3c2c1	651.15
341	O=C1c2nn(-c3c([N+](=O)[O-])cc([N+](=O)[O-])cc3[N+](=O)[O-])nc2C(=O)c2nn(-c3c([N+](=O)[O-])cc([N+](=O)[O-])cc3[N+](=O)[O-])nc21	703.15
342	O=[N+]([O-])c1cc2c(n[n+]3c4cc([N+](=O)[O-])c5no[n+]([O-])c5c4[n-]n23)c2c1no[n+]2[O-]	548.15
343	Cn1ncc(C#N)c1Nc1nnc2nncn2n1	526.65
344	Cn1nc([N+](=O)[O-])c(Nc2nnc3nncn3n2)c1[N+](=O)[O-]	512.65
345	Cn1nc([N+](=O)[O-])c([N+](=O)[O-])c1Nc1nnc2nncn2n1	507.15
346	COC(=O)c1n[nH]c(Nc2nnc3nncn3n2)n1	537.15
347	c1ccc(Cc2n[nH]c(Nc3nnc4nncn4n3)n2)cc1	557.15
348	c1ccc(CCc2n[nH]c(Nc3nnc4nncn4n3)n2)cc1	560.15
349	c1nnc2nnc(Nc3nnn[nH]3)nn12	463.65
350	c1nnc2nnc(Nc3nnc4nncn4n3)nn12	544.15
351	O=[N+]([O-])c1cnn(Nc2nnc3nncn3n2)c1	444.15
352	Cc1cc([N+](=O)[O-])nn1Nc1nnc2nncn2n1	566.15
353	O=[N+]([O-])c1cn(Nc2nnc3nncn3n2)nc1[N+](=O)[O-]	503.15
354	Cc1c(/C=N/Nc2nncn2N)no[n+]1[O-]	481.15
355	Cc1c(/C=N/Nc2nnn[nH]2)no[n+]1[O-]	464.15
356	O=[N+]([O-])c1nonc1C([N+](=O)[O-])[N+](=O)[O-]	331.15
357	O=[N+]([O-])c1nonc1-c1no[n+]([O-])c1-c1nonc1[N+](=O)[O-]	504.15
358	Nc1c([N+](=O)[O-])c2nnnn2c2no[n+]([O-])c12	407.15
359	[N-]=[N+]=NOCc1c(N)non1~[O]	402.55
360	O=[N+]([O-])c1no[n+]([O-])c1/N=N\c1c([N+](=O)[O-])no[n+]1[O-]	484.05
361	Nc1c(-c2no[n+]([O-])c2N)no[n+]1[O-]	433.15
362	[O-][n+]1onc2c1c1no[n+]([O-])c1c1no[n+]([O-])c21	498.15
363	[N-]=[N+]=Nc1cc(N=[N+]=[N-])c([N+](=O)[O-])cc1[N+](=O)[O-]	367.65
364	[N-]=[N+]=Nc1c([N+](=O)[O-])cc([N+](=O)[O-])c(N=[N+]=[N-])c1[N+](=O)[O-]	364.65
365	O=[N+]([O-])N1CCN([N+](=O)[O-])c2nonc21	406.15
366	O=c1[nH]c(=O)c2c(no[n+]2[O-])[nH]1	533.15
367	CNC(=O)c1c(N)no[n+]1[O-]	466.15
368	CC1=NN=NC1c1c([N+](=O)[O-])no[n+]1[O-]	364.15
369	O=[N+]([O-])c1no[n+]([O-])c1-c1no[n+]([O-])c1-c1c([N+](=O)[O-])no[n+]1[O-]	419.15
370	O=[N+]([O-])Nc1nonc1-c1noc(-c2nc(-c3nonc3N[N+](=O)[O-])no2)n1	373.15
371	O=[N+]([O-])Nc1nc(-c2nonc2/N=N/c2nonc2-c2noc(N[N+](=O)[O-])n2)no1	395.15
372	O=c1nc(/N=N/c2nc(=O)o[nH]2)[nH]o1	396.15
373	N#CC(=N\OC(=O)c1ccccc1)/C(=N\OC(=O)c1ccccc1)C(=N/OC(=O)c1ccccc1)/OC(=O)c1ccccc1	479.15
374	[NH2+]=c1[nH]nc([C-]([N+](=O)[O-])[N+](=O)[O-])o1	411.15
375	Nc1nc([N+](=O)[O-])no1	538.15
376	O=[N+]([O-])Nc1nc([N+](=O)[O-])no1	492.15
377	O=NN1CNC(=Nc2nc([N+](=O)[O-])no2)NC1	525.15
378	O=[N+]([O-])c1noc(N=C2NCN([N+](=O)[O-])CN2)n1	542.15
379	O=[N+]([O-])C(c1ncon1)[N+](=O)[O-]	438.15
380	COc1noc(N=C(N)N)n1	533.15
381	N/C(=N\c1nc([N+](=O)[O-])no1)Nc1nnc(N/C(N)=N/c2nc([N+](=O)[O-])no2)nn1	601.15
382	O=[N+]([O-])/N=c1\[nH]nc(C2=NNC(N[N+](=O)[O-])O2)o1	483.15
383	O=[N+]([O-])C(c1nnc(-c2nnc(C([N+](=O)[O-])([N+](=O)[O-])[N+](=O)[O-])o2)o1)([N+](=O)[O-])[N+](=O)[O-]	371.65
384	O=[N+]([O-])OCc1nc(-c2noc(CO[N+](=O)[O-])n2)no1	456.55
385	OCc1nc(-c2noc(CO)n2)no1	504.65
386	O=[N+]([O-])C(c1nnc2n1-c1nonc1-n1c-2nnc1C([N+](=O)[O-])([N+](=O)[O-])[N+](=O)[O-])([N+](=O)[O-])[N+](=O)[O-]	401.15
387	O=[N+]([O-])C(CNc1nc2nonc2nc1NCC([N+](=O)[O-])([N+](=O)[O-])[N+](=O)[O-])([N+](=O)[O-])[N+](=O)[O-]	464.15
388	[O-][n+]1nc2nc3nonc3[nH]c-2n1	554.15
389	O=[N+]([O-])NN1c2nonc2N(N[N+](=O)[O-])c2nonc21	347.15
390	c1n[nH]nc1-c1nn[nH]n1	628.15
391	c1occ2nc3c(nc12)NCCN3	544.15
392	c1occ2nc3c(nc12)NCCCO3	510.65
393	CNc1nc2nonc2n2nnnc12	438.15
394	O/N=c1\[nH]c2nonc2nc1N1CCOCC1	522.15
395	O=c1[nH]c2nonc2[nH]/c1=N\O	489.15
396	OCNc1nc2nonc2nc1NCO	535.65
397	O=[N+]([O-])N(CC([N+](=O)[O-])([N+](=O)[O-])[N+](=O)[O-])c1nc2nonc2nc1N(CC([N+](=O)[O-])([N+](=O)[O-])[N+](=O)[O-])[N+](=O)[O-]	419.15
398	Nc1nc2nonc2n2nnnc12	459.15
399	O=C(c1ccccc1)n1c(=N/O)/c(=N\O)n(C(=O)c2ccccc2)c2nonc21	445.65
400	[N]1c2nonc2[N]c2nonc21	446.15
401	n1[o+]nc2[n-]c3nonc3nc1-2	414.65
402	n1[o+]nc2nc3[n-]onc3nc12	415.65
403	O=Nn1c(=O)c(=O)n(N=O)c2nonc21	473.15
404	O=NN1c2nonc2Nc2nonc21	453.15
405	O=NN1c2nonc2N([N+](=O)[O-])c2nonc21	538.15
406	O=[N+]([O-])C(N1c2nonc2Nc2nonc21)[N+](=O)[O-]	423.15
407	CC(=O)N1c2nonc2N(C(C)=O)c2nonc21	523.15
408	O=[N+]([O-])Nc1nnc2nncnn12	405.15
409	c1nnc2nnc(/N=N\c3nnc4nncnn34)n2n1	578.15
410	NNc1nnc2nnc(N)n2n1	471.15
411	[N-]=[N+]=Nc1nnc2nnc(/N=N\c3nnc4nnc(N=[N+]=[N-])nn34)n2n1	456.15
412	N/C(=N\[N+](=O)[O-])Nc1nncnn1	505.15
413	c1nnc(Nc2nnn[nH]2)nn1	530.15
414	c1nnc(Nc2nncnn2)nn1	483.15
415	c1nnc(Nc2nnc(Nc3nncnn3)nn2)nn1	552.15
416	c1nnc(Nc2nnc3nncn3n2)nn1	513.15
417	c1nnc(N(c2nncnn2)c2nncnn2)nn1	504.15
418	NNc1nncnn1	358.65
419	Nc1n[nH]c(Nc2nnc(-n3nc(N)nc3N)nn2)n1	585.95
420	Nc1nc(N)n(-c2nnc(-n3nc(N)nc3N)nn2)n1	629.05
421	[N-]=[N+]=Nc1n[nH]c(Nc2nnc(Nc3nc(N=[N+]=[N-])n[nH]3)nn2)n1	462.95
422	[N-]=[N+]=Nc1n[nH]c(Nc2nnc(-n3nc(N=[N+]=[N-])nc3N)nn2)n1	462.85
423	O=[N+]([O-])c1n[nH]c(Nc2nnc(Nc3nc([N+](=O)[O-])n[nH]3)nn2)n1	556.75
424	Nc1nc([N+](=O)[O-])nn1-c1nnc(-n2nc([N+](=O)[O-])nc2N)nn1	554.75
425	O=[N+]([O-])OCC(COc1nnc(OCC(CO[N+](=O)[O-])(CO[N+](=O)[O-])CO[N+](=O)[O-])nn1)(CO[N+](=O)[O-])CO[N+](=O)[O-]	412.15
426	O=[N+]([O-])OCC(COc1nc(OCC(CO[N+](=O)[O-])(CO[N+](=O)[O-])CO[N+](=O)[O-])nc(OCC(CO[N+](=O)[O-])(CO[N+](=O)[O-])CO[N+](=O)[O-])n1)(CO[N+](=O)[O-])CO[N+](=O)[O-]	401.15
427	n1n[nH]c(Nc2nnc(Nc3nnn[nH]3)nn2)n1	582.15
428	Cn1nnc(Nc2nnc(Nc3nnn(C)n3)nn2)n1	579.15
429	c1n[nH]c(Nc2nnc(Nc3ncn[nH]3)nn2)n1	623.15
430	Oc1nnc2nncn2n1	505.15
431	Nc1[nH+]nc2n1[N-]C(O)N=N2	500.15
432	n1n[nH]c(-c2nnc(-c3nnn[nH]3)nn2)n1	499.15
433	O=[N+]([O-])Nc1nnc(-c2n[nH]c(-c3nnc(N[N+](=O)[O-])[nH]3)c2[N+](=O)[O-])[nH]1	407.55
434	O=[N+]([O-])Nc1nc(-c2nnc(N[N+](=O)[O-])[nH]2)n[nH]1	467.15
435	O=[N+]([O-])Nc1n[nH]c(-c2nnc(-c3nc(N[N+](=O)[O-])n[nH]3)nn2)n1	435.15
436	O=[N+]([O-])Nc1nc(-c2nnc(-c3nnc(N[N+](=O)[O-])[nH]3)nn2)n[nH]1	424.15
437	Nc1nn2n[n+]([O-])nc2n[n+]1[O-]	411.15
438	O=[N+]([O-])Nc1nnc2nncn2n1	421.15
439	O=[N+]([O-])Nc1nnc2nnc(N[N+](=O)[O-])n2n1	411.15
440	Nc1nc(N[N+](=O)[O-])nc2nc(NN=O)nn12	462.15
441	c1nnc(Nc2nonc2/N=N\c2nonc2Nc2nncnn2)nn1	492.15
442	Nc1[n+]([O-])ncn[n+]1[O-]	551.15
443	Cc1cc(C)n(-c2nnc(Nc3nncn3N)nn2)n1	503.65
444	NC(=O)NNc1nnc(-n2cccn2)nn1	549.65
445	Nc1n[n+]([O-])nc2c([N+](=O)[O-])cnn12	575.15
446	O=c1n[n+]([O-])nc2c([N+](=O)[O-])c[nH]n12	498.15
447	CN(CC(=O)NN)[N+](=O)[O-]	389.15
448	CN(CC(=O)N=[N+]=[N-])[N+](=O)[O-]	329.15
449	O=C(CC(C(=O)O)N(CC([N+](=O)[O-])([N+](=O)[O-])[N+](=O)[O-])[N+](=O)[O-])OCC([N+](=O)[O-])([N+](=O)[O-])[N+](=O)[O-]	432.15
450	[N-]=[N+]=NC(=O)C(=O)OCC([N+](=O)[O-])([N+](=O)[O-])[N+](=O)[O-]	323.15
451	O=C(NCC([N+](=O)[O-])([N+](=O)[O-])[N+](=O)[O-])NCC([N+](=O)[O-])([N+](=O)[O-])[N+](=O)[O-]	460.15
452	O=[N+]([O-])c1cc([N+](=O)[O-])c(-c2nnc(-c3nnc(-c4c([N+](=O)[O-])cc([N+](=O)[O-])cc4[N+](=O)[O-])o3)o2)c([N+](=O)[O-])c1	608.15
453	O=C(N[N+](=O)[O-])OCC(COC(=O)N[N+](=O)[O-])OC(=O)N[N+](=O)[O-]	425.15
454	Nc1c([N+](=O)[O-])c(N)c2c([nH+]nn2[O-])c1[N+](=O)[O-]	530.15
455	Nc1nonc1[N+](=O)[O-]	416.15
456	O=C(OCCC([N+](=O)[O-])([N+](=O)[O-])[N+](=O)[O-])C(=O)OCCC([N+](=O)[O-])([N+](=O)[O-])[N+](=O)[O-]	443.15
457	CC1C2(C)OOC1(C)OO2	409.15
458	CC12OOC(C)(OO1)C2(C)C	383.15
459	Cc1cc(N=Nc2ccccc2C)ccc1N	576.15
460	Nc1cc([N+](=O)[O-])ccc1O	446.15
461	CC(C)(C#N)N=NC(C)(C)C#N	379.15
462	O=Cc1ccccc1	528.15
463	NNC(=O)c1ccccc1	533.15
464	OCCNCc1ccccc1	626.15
465	O=C(Nc1ccccc1)Nc1ccccc1	592.15
466	N#CCC(=O)N1CCCCC1	575.65
467	ON=C1CCCCC1=NO	471.15
468	ON=C1CCCCC1	480.15
469	COc1ccc(OC)c(C=O)c1	635.15
470	NC(=O)c1cc([N+](=O)[O-])cc([N+](=O)[O-])c1	654.15
471	Cc1cccc(C)[n+]1[O-]	566.15
472	CC(O)C(N)=O	560.85
473	NNC(=O)CC(=O)NN	481.15
474	COc1ccco1	540.25
475	COc1cccc([N+](=O)[O-])c1	649.15
476	O=Nc1c(O)ccc2ccccc12	413.15
477	Cc1ccccc1[N+](=O)[O-]	611.15
478	ON=Cc1ccccc1O	522.15
479	CN(N=O)C(N)=O	376.15
480	O=[N+]([O-])Nc1nonc1-c1nnc(/N=N/c2nnc(-c3nonc3N[N+](=O)[O-])o2)o1	521.15
481	[O]~n1onc2c1-c1nonc1Nc1nonc1-2	547.05
482	O=[N+]([O-])c1nonc1N(CN(c1nonc1[N+](=O)[O-])[N+](=O)[O-])[N+](=O)[O-]	372.15
483	NC(=N\O)/C(N)=N\O	477.15
484	N(=N\c1nonc1-n1nc2c(n1)NON2)\c1nonc1-n1nc2c(n1)NON2	374.15
485	O=[N+]([O-])c1ccc(N2c3nonc3N(c3ccc([N+](=O)[O-])cc3[N+](=O)[O-])c3nonc32)c([N+](=O)[O-])c1	678.15
486	O=[N+]([O-])Nc1nonc1Nc1nnc2nnc(N[N+](=O)[O-])n2n1	398.15
487	CC(=O)N/C(=N\O)c1nonc1N	526.15
488	CC1(C)OC(=O)C(=NNc2nonc2-c2ccccc2)C(=O)O1	437.15
489	CC1(C)CC(=O)C(=NNc2nonc2N)C(=O)C1	416.15
490	O=[N+]([O-])c1nonc1-c1no[n+]([O-])c1[N+](=O)[O-]	419.15
491	Nc1nonc1-n1nncc1-c1ccc([N+](=O)[O-])cc1	414.15
492	[N-]=[N+]=Nc1ccc([N+](=O)[O-])c([N+](=O)[O-])c1	364.65
493	O=[N+]([O-])c1no[n+]([O-])c1/N=N/c1c([N+](=O)[O-])no[n+]1[O-]	392.15
494	O=[N+]([O-])Nc1nc(/N=N/c2noc(N[N+](=O)[O-])n2)no1	413.15
495	NC(N)=Nc1nc([N+](=O)[O-])no1	563.15
496	On1nnnc1-c1ncon1	416.15
497	O/N=c1/[nH]c2nonc2[nH]/c1=N/O	593.15
498	O=c1n([N+](=O)[O-])nc2n1-c1nonc1-n1c-2nn([N+](=O)[O-])c1=O	413.15
499	n1onc2nc3[n-][o+]nc3nc12	418.65
500	[N-]=[N+]=Nc1nnc2nnc(N)n2n1	438.15
501	[N-]=[N+]=Nc1nc(N)n(-c2nnc(-n3nc(N=[N+]=[N-])nc3N)nn2)n1	458.85
502	Nc1nn2nnnc2n[n+]1[O-]	505.15
503	Nc1c([N+](=O)[O-])nn(Cn2nc([N+](=O)[O-])c(N)c2[N+](=O)[O-])c1[N+](=O)[O-]	583.15
504	CC1(O)CCC(C)(OO)OO1	404.15
505	CC1C(C)(O)OOC1(C)OO	355.15
506	[N-]=[N+]=NC(=O)CCN(CC([N+](=O)[O-])([N+](=O)[O-])[N+](=O)[O-])[N+](=O)[O-]	338.15
507	O=C(OCC([N+](=O)[O-])([N+](=O)[O-])[N+](=O)[O-])C(=O)OCC([N+](=O)[O-])([N+](=O)[O-])[N+](=O)[O-]	459.15
508	[N-]=[N+]=NC(=O)NC(=O)OCC([N+](=O)[O-])([N+](=O)[O-])[N+](=O)[O-]	400.15
509	O=C(NCCC([N+](=O)[O-])([N+](=O)[O-])[N+](=O)[O-])NCCC([N+](=O)[O-])([N+](=O)[O-])[N+](=O)[O-]	433.15
510	Nc1nnc(-c2nnc(N)n2N[N+](=O)[O-])n1N[N+](=O)[O-]	532.15
511	O=C(N[N+](=O)[O-])OCC(COC(=O)N[N+](=O)[O-])(COC(=O)N[N+](=O)[O-])[N+](=O)[O-]	421.15
512	CN(C[n+]1nn([O-])c2cc([N+](=O)[O-])cc([N+](=O)[O-])c21)[N+](=O)[O-]	420.15
513	O=[N+]([O-])C(CCNCC([N+](=O)[O-])([N+](=O)[O-])[N+](=O)[O-])([N+](=O)[O-])[N+](=O)[O-]	369.15
514	O=[N+]([O-])N(CC([N+](=O)[O-])([N+](=O)[O-])[N+](=O)[O-])CC([N+](=O)[O-])([N+](=O)[O-])[N+](=O)[O-]	369.15
515	COc1ccccc1NC(C)=O	664.15
516	CC(=O)NO	444.15
517	NC(=O)NC1NC(=O)NC1=O	514.15
518	CCCCCON=O	475.15
519	Nc1nc2n[nH]nc2c(=O)[nH]1	635.15
520	CC(=O)C(C)=NO	493.15
521	O=C(NNc1ccccc1)Nc1ccccc1	493.15
522	CCOc1ccc2ccccc2c1	630.95
523	CN(C)c1ccc(N=Nc2ccccc2C(=O)O)cc1	478.15
524	CC(=O)Nc1ccccc1[N+](=O)[O-]	637.15
525	COc1ccccc1[N+](=O)[O-]	630.15
526	NC(=O)c1cccc([N+](=O)[O-])c1	655.15
527	O=[N+]([O-])c1ccccc1	673.15
528	NNC(=O)c1ccc([N+](=O)[O-])cc1	498.15
529	O=C(O)c1ccc([N+](=O)[O-])cc1	652.15
530	NC(=O)NN=Cc1ccc([N+](=O)[O-])o1	507.05
531	O=[N+]([O-])c1ccccc1O	573.15
532	CN(C)N=O	616.15
533	Cc1cccc([N+](=O)[O-])c1	634.15
534	O=c1[nH]cc([N+](=O)[O-])c(=O)[nH]1	576.55
535	Cc1cc[n+]([O-])cc1	558.15
536	COc1cc(C=CC(=O)O)cc(OC)c1OC	655.15
537	Cc1cc(C)c(C)c(O)c1	563.15
538	Oc1ccc(N=Nc2ccccn2)c(O)c1	471.15
539	O=[N+]([O-])c1nonc1-c1c([N+](=O)[O-])n[nH]c1[N+](=O)[O-]	496.43
540	O=[N+]([O-])N1CN([N+](=O)[O-])CN([N+](=O)[O-])CN([N+](=O)[O-])C1	591.15
541	O=[N+]([O-])c1nonc1NCNc1nonc1[N+](=O)[O-]	454.15
542	Nc1nn(~[O])c2nonc2c1[N+](=O)[O-]	448.15
543	[N-]=[N+]=Nc1nonc1/N=N\c1nonc1N	373.65
544	O=[N+]([O-])c1nonc1-c1noc(-c2nc(-c3nonc3[N+](=O)[O-])no2)n1	568.15
545	Cc1c(NN=C2C(=O)OC(C)(C)OC2=O)no[n+]1[O-]	428.65
546	Nc1nonc1N	512.15
547	O=[N+]([O-])Nc1n[nH]c(-c2nonc2/N=N\c2nonc2-c2nc(N[N+](=O)[O-])n[nH]2)n1	447.45
548	[O-][n+]1c2nonc2c2nonc2[n+]1[O-]	377.65
549	Nc1no[n+]([O-])c1/N=N\c1c(N)no[n+]1[O-]	430.35
550	Nc1no[n+]([O-])c1-c1c(N)no[n+]1[O-]	443.15
551	O=[N+]([O-])c1no[n+]([O-])c1-c1c([N+](=O)[O-])no[n+]1[O-]	413.15
552	O=[N+]([O-])C(=N\O)/C(=N/O)[N+](=O)[O-]	357.15
553	O=c1[nH]c(-c2c(/N=N/c3no[n+]([O-])c3-c3noc(=O)[nH]3)no[n+]2[O-])no1	462.15
554	O=[N+]([O-])Nc1nc(-c2c(/N=N/c3no[n+]([O-])c3-c3noc(N[N+](=O)[O-])n3)no[n+]2[O-])no1	399.15
555	O/N=C(O)/C(=N\O)c1cnon1	436.65
556	Nn1nc([C-]([N+](=O)[O-])[N+](=O)[O-])oc1=[NH2+]	416.15
557	c1cc(-c2nn[nH]n2)ccc1-c1ccc(C2N=NN=N2)cc1	599.65
558	CC(C)(/N=N/c1no[n+]([O-])c1-c1ccccc1)[N+](=O)[O-]	383.15
559	CNc1nc2nonc2nc1N	484.15
560	O=[N+]([O-])OCN(c1nc2nonc2nc1N(CO[N+](=O)[O-])[N+](=O)[O-])[N+](=O)[O-]	379.15
561	[N-]=[N+]=Nc1nc2nonc2n2nnnc12	423.05
562	[N-]=[N+]=Nc1nnc2nnc(N[N+](=O)[O-])n2n1	423.15
563	c1nnc(Nc2ncn[nH]2)nn1	541.15
564	Nc1n[nH]c(Nc2nnc(Nc3nc(N)n[nH]3)nn2)n1	630.25
565	Nc1c([N+](=O)[O-])nc([N+](=O)[O-])c(N)[n+]1[O-]	615.15

## Sheet: Melting Point
ID	name	smiles	mpC	csid
1	2-(2,4-dinitrobenzyl)pyridine	c1ccnc(c1)Cc2ccc(cc2[N+](=O)[O-])[N+](=O)[O-]	92	64018
2	2-(1-piperidinyl)aniline	c1ccc(c(c1)N)N2CCCCC2	46	403764
3	2-(1-piperazinyl)pyrimidine	c1cnc(nc1)N2CCNCC2	33	80080
4	2-(1-piperazinyl)phenol	c1ccc(c(c1)N2CCNCC2)O	125	63701
5	2-(1-cyclohexenyl)ethylamine	C1CCC(=CC1)CCN	-55	69388
6	2-(1-boc-4-piperidinyloxy)-n-methylacetamide	CC(C)(C)OC(=O)N1CCC(CC1)OCC(=O)NC	95	25027436
7	2-(1-boc-4-piperidinyloxy)-n-cyclopropylacetamide	CC(C)(C)OC(=O)N1CCC(CC1)OCC(=O)NC2CC2	86	25027435
8	2-(1-boc-4-piperidinyloxy)-n,n-dimethylacetamide	CC(C)(C)OC(=O)N1CCC(CC1)OCC(=O)N(C)C	58	25027429
9	1-trimethylsilyl-1-propyne	CC#C[Si](C)(C)C	-69	72592
10	1-tetralone	c1ccc2c(c1)CCCC2=O	7.5	10273
11	1-pyrenecarboxaldehyde	c1cc2ccc3ccc(c4c3c2c(c1)cc4)C=O	127	202982
12	1-phenylcyclopropanecarboxylic acid	c1ccc(cc1)C2(CC2)C(=O)O	87	72450
13	1-phenylcyclohexanol	c1ccc(cc1)C2(CCCCC2)O	61.75	14582
14	1-phenyl-3-pyrazolidinone	c1ccc(cc1)N2CCC(=O)N2	123.3	6823
15	1-phenyl-2-pyrrolidinone	c1ccc(cc1)N2CCCC2=O	66	70744
16	1-pentyne	CCCC#C	-100.67	11806
17	1-octylamine	CCCCCCCCN	-1	7851
18	1-octene	CCCCCCC=C	-102	7833
19	1-octanethiol	CCCCCCCCS	-49	7852
20	1-octanesulfonyl chloride	CCCCCCCCS(=O)(=O)Cl	14	74237
21	1-nonylamine	CCCCCCCCCN	-1	15387
22	1-nitropropane	CCC[N+](=O)[O-]	-108	7615
23	1-nitro-4-n-propylbenzene	CCCc1ccc(cc1)[N+](=O)[O-]	-14	74507
24	1-nitro-4-(trifluoromethoxy)benzene	c1cc(ccc1[N+](=O)[O-])OC(F)(F)F	15	455696
25	1-n-hexyl-4-[(p-tolyl)ethynyl]benzene	CCCCCCc1ccc(cc1)C#Cc2ccc(cc2)C	42	13903845
26	1-n-butyl-4-[(4-butylphenyl)ethynyl]benzene	CCCCc1ccc(cc1)C#Cc2ccc(cc2)CCCC	41	13672731
27	1-naphthylacetic acid	c1ccc2c(c1)cccc2CC(=O)O	133.3	6601
28	1-naphthyl isocyanate	c1ccc2c(c1)cccc2N=C=O	4	59958
29	1-naphthoic hydrazide	c1ccc2c(c1)cccc2C(=O)NN	167	65539
30	1-methylsulfonyl-4-nitrobenzene	CS(=O)(=O)c1ccc(cc1)[N+](=O)[O-]	137	226776
31	1-methylpyrrole-2-carboxylic acid	Cn1cccc1C(=O)O	137	73496
32	1-methylpiperidine	CN1CCCCC1	-50	11788
33	1-methylisoquinoline	Cc1c2ccccc2ccn1	10	14833
34	2-(2,4,5-trichlorophenoxy)propionic acid	CC(C(=O)O)Oc1cc(c(cc1Cl)Cl)Cl	178.5	6891
35	2-(2,2,2-trimethylacetamido)benzeneboronic acid	B(c1ccccc1NC(=O)C(C)(C)C)(O)O	270	3404039
36	2-(1-pyrrolyl)benzoic acid	c1ccc(c(c1)C(=O)O)n2cccc2	104	636237
37	2-(1-pyrrolidinyl)phenol	c1ccc(c(c1)N2CCCC2)O	111	2016589
38	2-(1-piperidinyl)thiazole-5-carboxaldehyde	c1c(sc(n1)N2CCCCC2)C=O	49	1221177
39	2-(1-piperidinyl)phenol	c1ccc(c(c1)N2CCCCC2)O	75	2512035
40	2-(1-piperidinyl)benzonitrile	c1ccc(c(c1)C#N)N2CCCCC2	43	2054756
41	2-(1-piperazinyl)aniline	c1ccc(c(c1)N)N2CCNCC2	115	381133
42	2-(1-naphthyl)ethanol	c1ccc2c(c1)cccc2CCO	62	12505
43	2-(1,3-benzodioxol-5-yl)piperazine	c1cc2c(cc1C3CNCCN3)OCO2	122	2052209
44	1-undecyne	CCCCCCCCCC#C	-25	67793
45	1-undecanol	CCCCCCCCCCCO	15	7892
46	1-tritylimidazole	c1ccc(cc1)C(c2ccccc2)(c3ccccc3)n4ccnc4	222	537282
47	1-trifluoromethylcyclopropane-1-carboxylic acid	C1CC1(C(=O)O)C(F)(F)F	88	2058564
48	1-tridecene	CCCCCCCCCCCC=C	-23	16180
49	1-thio-beta-D-glucose tetraacetate	CC(=O)OC[C@@H]1[C@H]([C@@H]([C@H]([C@@H](O1)S)OC(=O)C)OC(=O)C)OC(=O)C	116	79653
50	1-tetradecene	CCCCCCCCCCCCC=C	-12.5	13622
51	1-tetradecanethiol	CCCCCCCCCCCCCCS	7	58226
52	1-tert-butyl-2-imidazolidinone	CC(C)(C)N1CCNC1=O	137	2074113
53	1-pyrenebutyric acid	c1cc2ccc3ccc(c4c3c2c(c1)cc4)CCCC(=O)O	185	69424
54	1-propylamine	CCCN	-83	7564
55	1-propanethiol	CCCS	-113	7560
56	1-piperonylpiperazine	c1cc2c(cc1CN3CCNCC3)OCO2	43	85214
57	1-phenylsemicarbazide	c1ccc(cc1)NNC(=O)N	172	54963
58	1-phenylpyrrole	c1ccc(cc1)n2cccc2	60.5	11970
59	1-phenylpiperazine	c1ccc(cc1)N2CCNCC2	18	6829
60	1-phenylisatin	c1ccc(cc1)N2c3ccccc3C(=O)C2=O	141	12351
61	1-phenylcyclopentanecarboxylic acid	c1ccc(cc1)C2(CCCC2)C(=O)O	160	59554
62	1-phenyl-3-trifluoromethyl-2-pyrazolin-5-one	c1ccc(cc1)N2C(=O)CC(=N2)C(F)(F)F	193	581557
63	1-phenyl-2-propyn-1-ol	C#CC(c1ccccc1)O	25	18989
64	1-phenyl-1,2,3-butanetrione 2-oxime	CC(=O)C(=NO)C(=O)c1ccccc1	129	5208254
65	1-pentylamine	CCCCCN	-55	7769
66	1-pentenylboronic acid	B(C=CCCC)(O)O	80	2016355
67	1-pentanethiol	CCCCCS	-76	7776
68	1-pentadecyne	CCCCCCCCCCCCCC#C	10	63022
69	1-pentadecene	CCCCCCCCCCCCCC=C	-3.6	24142
70	1-octen-3-ol	CCCCCC(C=C)O	-49	17778
71	1-octadecanesulfonyl chloride	CCCCCCCCCCCCCCCCCCS(=O)(=O)Cl	58	59660
72	1-o-acetyl-2,3,5-tri-o-benzoyl-beta-D-ribofuranose	CC(=O)O[C@@H]1[C@H]([C@H]([C@@H](O1)COC(=O)c2ccccc2)OC(=O)c3ccccc3)OC(=O)c4ccccc4	129	9148396
73	1-nonyne	CCCCCCCC#C	-50	17880
74	1-nonanol	CCCCCCCCCO	-5.6	8574
75	1-n-butyl-4-[(4-methoxyphenyl)ethynyl]benzene	CCCCc1ccc(cc1)C#Cc2ccc(cc2)OC	40	533364
76	1-n-butyl-4-[(4-ethoxyphenyl)ethynyl]benzene	CCCCc1ccc(cc1)C#Cc2ccc(cc2)OCC	54	530485
77	1-naphthylacetonitrile	c1ccc2c(c1)cccc2CC#N	33.25	8277
78	1-naphthyl isothiocyanate	c1ccc2c(c1)cccc2N=C=S	57.33	10609
79	1-naphthoyl chloride	c1ccc2c(c1)cccc2C(=O)Cl	22	63334
80	1-naphthoic acid	c1ccc2c(c1)cccc2C(=O)O	161.3	6586
81	1-naphthalenemethanol	c1ccc2c(c1)cccc2CO	62.5	19669
82	1-naphthaleneboronic acid	B(c1cccc2c1cccc2)(O)O	207	223106
83	1-naphthaleneacethydrazide	c1ccc2c(c1)cccc2CC(=O)NN	168	221937
84	1-methylthio-1-methylamino-2-nitroethylene	CN/C(=C[N+](=O)[O-])/SC	113	2299656
85	1-methylsulfonyl-1h-benzotriazole	CS(=O)(=O)n1c2ccccc2nn1	110	692712
86	1-methylpyrrolidine	CN1CCCC1	-90	8143
87	1-methylpyrrole	Cn1cccc1	-57	7031
88	1-methylpiperazine	CN1CCNCC1	-6	48024
89	1-methylindole-3-carboxaldehyde	Cn1cc(c2c1cccc2)C=O	69	79297
90	1-methylimidazole-5-carboxaldehyde	Cn1cncc1C=O	55	498713
91	1-methylimidazole-4-carboxylic acid	Cn1cc(nc1)C(=O)O	242	471564
92	1-methylimidazole-4,5-dicarbonitrile	Cn1cnc(c1C#N)C#N	85	506965
93	1-methylimidazole	Cn1ccnc1	-6	1348
94	1-methylhydantoin	CN1CC(=O)NC1=O	158	62430
95	1-methylfluorene	Cc1cccc-2c1Cc3c2cccc3	85	14844
96	1-methylcyclohexanol	CC1(CCCCC1)O	26	11063
97	1-methylbenzimidazole-2-carboxaldehyde	Cn1c2ccccc2nc1C=O	120	666291
98	1-methylbenzimidazole	Cn1cnc2c1cccc2	61	86565
99	1-methyl-6-nitro-1h-indazole	Cn1c2cc(ccc2cn1)[N+](=O)[O-]	126	73345
100	1-methyl-5-nitro-1h-indazole	Cn1c2ccc(cc2cn1)[N+](=O)[O-]	160	246757
101	1-methyl-4-(4-piperidinyl)piperazine	CN1CCN(CC1)C2CCNCC2	55	695913
102	1-methyl-3-trifluoromethyl-2-pyrazolin-5-one	CN1C(=O)CC(=N1)C(F)(F)F	179	452422
103	1-methyl-3-phenylpiperazine	CN1CCNC(C1)c2ccccc2	58	2040757
104	1-methyl-3-n-propyl-2-pyrazolin-5-one	CCCC1=NN(C(=O)C1)C	115	454040
105	1-methyl-2-pyridone	Cn1ccccc1=O	31	12231
106	1-methyl-2-phenylindole	Cn1c2ccccc2cc1c3ccccc3	99	69541
107	1-methyl-1h-pyrazole-5-carboxylic acid	Cn1c(ccn1)C(=O)O	224	558328
108	1-methyl-1h-pyrazole-3-carboxylic acid	Cn1ccc(n1)C(=O)O	154	498339
109	1-methoxynaphthalene	COc1cccc2c1cccc2	5	15805
110	1-methoxy-2-propanol	CC(COC)O	97.33	7612
111	1-iodopropane	CCCI	-101	31029
112	1-iodooctane	CCCCCCCCI	-45.23	11874
113	1-iodonaphthalene	c1ccc2c(c1)cccc2I	4	6738
114	1-iodohexane	CCCCCCI	-75	12010
115	1-iodohexadecane	CCCCCCCCCCCCCCCCI	22	10541
116	1-iodoheptane	CCCCCCCI	-48	19100
117	1-iodododecane	CCCCCCCCCCCCI	-0.9	19108
118	1-iododecane	CCCCCCCCCCI	-16.1	15480
119	1-iodobutane	CCCCI	-103	10497
120	1-iodo-3-nitrobenzene	c1cc(cc(c1)I)[N+](=O)[O-]	37	21106127
121	1-iodo-3,5-dinitrobenzene	c1c(cc(cc1[N+](=O)[O-])I)[N+](=O)[O-]	101	205244
122	1-iodo-2-nitrobenzene	c1ccc(c(c1)[N+](=O)[O-])I	51.25	62332
123	1-iodo-2,4-dinitrobenzene	c1cc(c(cc1[N+](=O)[O-])[N+](=O)[O-])I	89	62930
124	1-iodo-2,3,4,5-tetramethylbenzene	Cc1cc(c(c(c1C)C)C)I	31	2057238
125	1-indanone	c1ccc2c(c1)CCC2=O	41	6479
126	1-indanol	c1ccc2c(c1)CCC2O	53.4	21394
127	1-hydroxyisoquinoline	c1ccc2c(c1)ccnc2O	214	9864
128	1-hydroxycyclohexyl phenyl ketone	c1ccc(cc1)C(=O)C2(CCCCC2)O	48	63536
129	1h-pyrazole-4-carboxylic acid	c1c(cn[nH]1)C(=O)O	282	2283974
130	1h-pyrazole	c1c[nH]nc1	68	1019
131	1h-indazole	c1ccc2c(c1)cn[nH]2	148	8866
132	1-hexyne	CCCCC#C	-132	12209
133	1-hexene	CCCCC=C	-140	11109
134	1-hexanethiol	CCCCCCS	-81	7815
135	1-hexadecyne	CCCCCCCCCCCCCCC#C	15	11890
136	1-hexadecanesulfonyl chloride	CCCCCCCCCCCCCCCCS(=O)(=O)Cl	57	87515
137	1-heptyne	CCCCCC#C	-81	11845
138	1-heptanol	CCCCCCCO	-34	7837
139	1-heptadecanol	CCCCCCCCCCCCCCCCCO	55.7	14348
140	1h-benzotriazole	c1ccc2c(c1)[nH]nn2	98.33	6950
141	1h-1,2,4-triazole-1-acetic acid	c1ncn(n1)CC(=O)O	203	1414891
142	1h-1,2,3-triazole	c1cnn[nH]1	23.67	60839
143	1-fluoro-4-nitrobenzene	c1cc(ccc1[N+](=O)[O-])F	23	13856885
144	1-fluoronaphthalene	c1ccc2c(c1)cccc2F	-10.67	9078
145	1-fluoro-4-iodobenzene	c1cc(ccc1F)I	-23.5	21108548
146	1-fluoro-3-iodobenzene	c1cc(cc(c1)I)F	-42	63890
147	1-fluoro-3-iodo-5-nitrobenzene	c1c(cc(cc1F)I)[N+](=O)[O-]	78	227395
148	1-fluoro-3,5-dimethyl-2-nitrobenzene	Cc1cc(c(c(c1)F)[N+](=O)[O-])C	56	10622393
149	1-fluoro-2-nitrobenzene	c1ccc(c(c1)[N+](=O)[O-])F	-7	66528
150	1-fluoro-2-iodobenzene	c1ccc(c(c1)F)I	-42	21168731
151	1-fluoro-2,4-dinitrobenzene	c1cc(c(cc1[N+](=O)[O-])[N+](=O)[O-])F	27	21106037
152	1-ethynylpyrene	C#Cc1ccc2ccc3cccc4c3c2c1cc4	114	136472
153	1-ethynylcyclopentanol	C#CC1(CCCC1)O	26	78543
154	1-ethynylcyclohexanol	C#CC1(CCCCC1)O	32	6277
155	1-ethylpiperidine	CCN1CCCCC1	-20	12466
156	1-ethylpiperazine-2,3-dione	CCN1CCNC(=O)C1=O	109	97850
157	1-ethyl-4-[(4-n-propylphenyl)ethynyl]benzene	CCCc1ccc(cc1)C#Cc2ccc(cc2)CC	50	532944
158	1-ethyl-4-[(p-tolyl)ethynyl]benzene	CCc1ccc(cc1)C#Cc2ccc(cc2)C	73	9588255
159	1-ethyl-4-iodobenzene	CCc1ccc(cc1)I	-17	21170937
160	1-ethyl-4-[(4-n-hexylphenyl)ethynyl]benzene	CCCCCCc1ccc(cc1)C#Cc2ccc(cc2)CC	10	14282860
161	1-ethyl-4-[(4-methoxyphenyl)ethynyl]benzene	CCc1ccc(cc1)C#Cc2ccc(cc2)OC	35	3173032
162	1-ethyl-3-methyl-1h-pyrazole-5-carboxylic acid	CCn1c(cc(n1)C)C(=O)O	139	2025303
163	1-ethyl-2-phenylindole	CCn1c2ccccc2cc1c3ccccc3	86	75113
164	1-ethoxy-2-propanol	CCOCC(C)O	-100	14552
165	1-eicosanol	CCCCCCCCCCCCCCCCCCCCO	65.05	11898
166	1-dodecyne	CCCCCCCCCCC#C	-19	63019
167	1-dodecanethiol	CCCCCCCCCCCCS	-7.5	7903
168	1-dodecanesulfonyl chloride	CCCCCCCCCCCCS(=O)(=O)Cl	41	59659
169	1-dimethylamino-2-propanol	CC(CN(C)C)O	-85	34412
170	1-difluoromethoxy-4-nitrobenzene	c1cc(ccc1[N+](=O)[O-])OC(F)F	34	2018665
171	1-dimethylamino-2-nitroethylene	CN(C)/C=C/[N+](=O)[O-]	103	553501
172	1-decyne	CCCCCCCCC#C	-44	12456
173	1-decene	CCCCCCCCC=C	-66	12809
174	1-decanethiol	CCCCCCCCCCS	-26	8577
175	1-cyclopentyl-2,2-dimethyl-1-propanol	CC(C)(C)C(C1CCCC1)O	49	474624
176	1-decanesulfonyl chloride	CCCCCCCCCCS(=O)(=O)Cl	32	98114
177	1-cyclopentene-1-carboxylic acid	C1CC=C(C1)C(=O)O	119	86635
178	1-cyclohexyl-2-pyrrolidinone	C1CCC(CC1)N2CCCC2=O	13	73333
179	1-cyclohexene-1-carboxylic acid	C1CCC(=CC1)C(=O)O	35	62677
180	1-cyclohexene-1-acetic acid	C1CCC(=CC1)CC(=O)O	33	78202
181	1-cyanomethylpiperidine	C1CCN(CC1)CC#N	25	17157
182	1-cyanoacetyl-3,5-dimethyl-1h-pyrazole	Cc1cc(n(n1)C(=O)CC#N)C	120	230143
183	1-cyano-1-cyclopropanecarboxylic acid	C1CC1(C#N)C(=O)O	146	2015062
184	1-chlorophthalazine	c1ccc2c(c1)cnnc2Cl	111	141280
185	1-chlorophthalazin-4-one	c1ccc2c(c1)c(=O)[nH]nc2Cl	272	2055513
186	1-chlorooctane	CCCCCCCCCl	-58	7850
187	1-chloroisoquinoline	c1ccc2c(c1)ccnc2Cl	34	123953
188	1-chloroethyl chloroformate	CC(OC(=O)Cl)Cl	-65	454726
189	1-chlorobutane	CCCCCl	-123	7714
190	1-chloroanthraquinone	c1ccc2c(c1)C(=O)c3cccc(c3C2=O)Cl	160.7	6453
191	1-chloroadamantane	C1C2CC3CC1CC(C2)(C3)Cl	165	57728
192	1-chloroacetyl-3-pyrazolidinone	C1CN(NC1=O)C(=O)CCl	146	2006819
193	1-chloro-4-iodobenzene	c1cc(ccc1Cl)I	55	13868660
194	1-chloro-4-fluorobenzene	c1cc(ccc1F)Cl	-24.4	9228
195	1-chloro-4-fluoro-2-nitrobenzene	c1cc(c(cc1F)[N+](=O)[O-])Cl	38	21170961
196	1-chloro-3-nitrobenzene	c1cc(cc(c1)Cl)[N+](=O)[O-]	45	21106013
197	1-chloro-3,5-dimethoxybenzene	COc1cc(cc(c1)Cl)OC	34	73537
198	1-chloro-3,5-dibromobenzene	c1c(cc(cc1Br)Br)Cl	93	76386
199	1-chloro-3,4-dinitrobenzene	c1cc(c(cc1Cl)[N+](=O)[O-])[N+](=O)[O-]	23	30597
200	1-chloro-2-nitrobenzene	c1ccc(c(c1)[N+](=O)[O-])Cl	33	13853953
201	1-chloro-2-methylpropane	CC(C)CCl	-131	10114
202	1-chloro-2-iodobenzene	c1ccc(c(c1)Cl)I	1	21171406
203	1-chloro-2-fluorobenzene	c1ccc(c(c1)F)Cl	-43	21111912
204	1-chloro-2,4-difluorobenzene	c1cc(c(cc1F)F)Cl	-26	120718
205	1-chloro-2,4-difluoro-3-nitrobenzene	c1cc(c(c(c1F)[N+](=O)[O-])F)Cl	47	15347984
206	1-chloro-2,4-bis(trifluoromethyl)benzene	c1cc(c(cc1C(F)(F)F)C(F)(F)F)Cl	-59	2053633
207	1-butanesulfonyl chloride	CCCCS(=O)(=O)Cl	-29	67962
208	1-bromopyrene	c1cc2ccc3ccc(c4c3c2c(c1)cc4)Br	95	140350
209	1-bromoperfluorooctane	C(C(C(C(C(F)(F)Br)(F)F)(F)F)(F)F)(C(C(C(F)(F)F)(F)F)(F)F)(F)F	6	9489
210	1-bromopropane	CCCBr	-110	7552
211	1-bromopentane	CCCCCBr	-92.67	7766
212	1-bromopentadecane	CCCCCCCCCCCCCCCBr	19	11888
213	1-bromooctane	CCCCCCCCBr	-55	7848
214	1-bromooctadecane	CCCCCCCCCCCCCCCCCCBr	28	7926
215	1-bromoheptane	CCCCCCCBr	-57.33	11863
216	1-bromohexadecane	CCCCCCCCCCCCCCCCBr	17.5	7921
217	1-bromoadamantane	C1C2CC3CC1CC(C2)(C3)Br	119	71437
218	1-bromo-4-tert-butylbenzene	CC(C)(C)c1ccc(cc1)Br	16	21171393
219	1-bromo-4-nitrobenzene	c1cc(ccc1[N+](=O)[O-])Br	126	21171513
220	1-bromo-4-iodobenzene	c1cc(ccc1Br)I	91	11038
221	1-bromo-4-fluoronaphthalene	c1ccc2c(c1)c(ccc2Br)F	35	60966
222	1-bromo-4-fluorobenzene	c1cc(ccc1F)Br	-16	13875180
223	1-bromo-4-fluoro-2-nitrobenzene	c1cc(c(cc1F)[N+](=O)[O-])Br	38	2053801
224	1-bromo-4-chlorobenzene	c1cc(ccc1Cl)Br	66.67	7518
225	1-bromo-4-chloro-2-nitrobenzene	c1cc(c(cc1Cl)[N+](=O)[O-])Br	70	2073795
226	1-bromo-3-fluorobenzene	c1cc(cc(c1)Br)F	-8	13875307
227	1-bromo-3-chlorobenzene	c1cc(cc(c1)Br)Cl	-22	13875377
228	1-bromo-3,5-di-tert-butylbenzene	CC(C)(C)c1cc(cc(c1)Br)C(C)(C)C	64	538911
229	1-bromo-3,5-difluorobenzene	c1c(cc(cc1F)Br)F	-27	120087
230	1-bromo-3,5-dichlorobenzene	c1c(cc(cc1Cl)Br)Cl	79	27660
231	1-bromo-3,5-bis(trifluoromethyl)benzene	c1c(cc(cc1C(F)(F)F)Br)C(F)(F)F	-16	60922
232	1-bromo-3,3-diphenylpropane	c1ccc(cc1)C(CCBr)c2ccccc2	41	79689
233	1-bromo-2-naphthol	c1ccc2c(c1)ccc(c2Br)O	79.33	10840
234	1-bromo-2-methoxynaphthalene	COc1ccc2ccccc2c1Br	80	65692
235	1-bromo-2-iodobenzene	c1ccc(c(c1)Br)I	9.83	10935
236	1-bromo-2-hexadecanone	CCCCCCCCCCCCCCC(=O)CBr	56	15540029
237	1-bromo-2-fluorobenzene	c1ccc(c(c1)F)Br	-8	13875433
238	1-bromo-2-fluoro-4-iodobenzene	c1cc(c(cc1I)F)Br	36	2007118
239	1-bromo-2-ethylbenzene	CCc1ccccc1Br	-68	21111882
240	1-bromo-2-chloro-4-nitrobenzene	c1cc(c(cc1[N+](=O)[O-])Cl)Br	61	31905
241	1-bromo-2,5-difluoro-4-nitrobenzene	c1c(c(cc(c1F)Br)F)[N+](=O)[O-]	56	2017958
242	1-bromo-2,4-dinitrobenzene	c1cc(c(cc1[N+](=O)[O-])[N+](=O)[O-])Br	72	10957
243	1-bromo-2,4-difluorobenzene	c1cc(c(cc1F)F)Br	-4	60993
244	1-bromo-2,4-dichlorobenzene	c1cc(c(cc1Cl)Cl)Br	27	21170125
245	1-bromo-2,4,5-trifluorobenzene	c1c(c(cc(c1F)Br)F)F	-19	60918
246	1-bromo-2,3-dichlorobenzene	c1cc(c(c(c1)Br)Cl)Cl	59	38364
247	1-bromo-2,3,5-trichlorobenzene	c1c(cc(c(c1Cl)Cl)Br)Cl	59	3584810
248	1-boc-pyrrole-2-carboxaldehyde	CC(C)(C)OC(=O)n1cccc1C=O	51	4234332
249	1-boc-piperazine	CC(C)(C)OC(=O)N1CCNCC1	46	126561
250	1-boc-nipecotic acid ethyl ester	CCOC(=O)C1CCCN(C1)C(=O)OC(C)(C)C	33	317563
251	1-boc-isonipecotic acid	CC(C)(C)OC(=O)N1CCC(CC1)C(=O)O	150	348191
252	1-boc-indoline	CC(C)(C)OC(=O)N1CCc2c1cccc2	47	2897139
253	1-boc-imidazole	CC(C)(C)OC(=O)n1ccnc1	46	454689
254	1-boc-azetidine-3-carboxylic acid	CC(C)(C)OC(=O)N1CC(C1)C(=O)O	102	2036748
255	1-boc-6-amino-1h-indazole	CC(C)(C)OC(=O)n1c2cc(ccc2cn1)N	172	13355035
256	1-boc-4-piperidone	CC(C)(C)OC(=O)N1CCC(=O)CC1	74	643046
257	1-boc-4-piperidinemethanol	CC(C)(C)OC(=O)N1CCC(CC1)CO	80	2044759
258	1-boc-4-hydroxypiperidine	CC(C)(C)OC(=O)N1CCC(CC1)O	63	558645
259	1-boc-4-cyanopiperidine	CC(C)(C)OC(=O)N1CCC(CC1)C#N	47	1246152
260	1-boc-3-pyrrolidinone	CC(C)(C)OC(=O)N1CCC(=O)C1	36	413992
261	1-boc-3-piperidone	CC(C)(C)OC(=O)N1CCCC(=O)C1	38	2037585
262	1-boc-3-oxopiperazine	CC(C)(C)OC(=O)N1CCNC(=O)C1	158	2409139
263	1-boc-3-hydroxypiperidine	CC(C)(C)OC(=O)N1CCCC(C1)O	68	474981
264	1-boc-3-hydroxyazetidine	CC(C)(C)OC(=O)N1CC(C1)O	40	2037561
265	1-boc-3-cyanoazetidine	CC(C)(C)OC(=O)N1CC(C1)C#N	70	8806645
266	1-boc-3-azetidinone	CC(C)(C)OC(=O)N1CC(=O)C1	51	1249417
267	1-boc-2-piperidone	CC(C)(C)OC(=O)N1CCCCC1=O	36	5894604
268	1-boc-2-(hydroxydimethylsilyl)pyrrole	CC(C)(C)OC(=O)n1cccc1[Si](C)(C)O	55	21169767
269	1-benzyloxycarbonyl-4-piperidone	c1ccc(cc1)COC(=O)N2CCC(=O)CC2	40	558639
270	1-benzyloxy-4-bromobenzene	c1ccc(cc1)COc2ccc(cc2)Br	62	122437
271	1-benzyloxy-4-iodobenzene	c1ccc(cc1)COc2ccc(cc2)I	62	453293
272	1-benzyloxy-3-iodobenzene	c1ccc(cc1)COc2cccc(c2)I	51	3437035
273	1-benzylimidazole	c1ccc(cc1)Cn2ccnc2	70	70309
274	1-benzyl-5-phenylbarbituric acid	c1ccc(cc1)CN2C(=O)C(C(=O)NC2=O)c3ccccc3	164	145617
275	1-benzyl-4-hydroxypiperidine	c1ccc(cc1)CN2CCC(CC2)O	62	70826
276	1-benzyl-4-cyano-4-hydroxypiperidine	c1ccc(cc1)CN2CCC(CC2)(C#N)O	97	72434
277	1-benzyl-4-boc-piperazine	CC(C)(C)OC(=O)N1CCN(CC1)Cc2ccccc2	72	507913
278	1-benzyl-3-hydroxy-1h-indazole	c1ccc(cc1)Cn2c3ccccc3c(n2)O	165	67727
279	1-benzyl-1,4,7,10-tetraazacyclododecane	c1ccc(cc1)CN2CCNCCNCCNCC2	85	8259620
280	1-benzyl-1,2,3-triazole-4,5-dicarboxylic acid	c1ccc(cc1)Cn2c(c(nn2)C(=O)O)C(=O)O	180	377795
281	1-benzoylpiperidine	c1ccc(cc1)C(=O)N2CCCCC2	49	63087
282	1-benzoylnaphthalene	c1ccc(cc1)C(=O)c2cccc3c2cccc3	76	62709
283	1-benzoyl-4-piperidone	c1ccc(cc1)C(=O)N2CCC(=O)CC2	55	81785
284	1-benzhydrylpiperazine	c1ccc(cc1)C(c2ccccc2)N3CCNCC3	92	63238
285	1-aza-18-crown-6	C1COCCOCCOCCOCCOCCN1	48	105979
286	1-aminoindane	c1ccc2c(c1)CCC2N	2	110041
287	1-amino-5-chloroanthraquinone	c1cc2c(c(c1)N)C(=O)c3cccc(c3C2=O)Cl	207	8024
288	1-amino-4-hydroxyanthraquinone	c1ccc2c(c1)C(=O)c3c(ccc(c3C2=O)O)N	212	8020
289	1-amino-2,4-dibromoanthraquinone	c1ccc2c(c1)C(=O)c3c(cc(c(c3C2=O)N)Br)Br	224.7	6429
290	1-adamantanemethanol	C1C2CC3CC1CC(C2)(C3)CO	117	58119
291	1-adamantaneethanol	C1C2CC3CC1CC(C2)(C3)CCO	74	99459
292	1-adamantaneacetic acid	C1C2CC3CC1CC(C2)(C3)CC(=O)O	137	109836
293	1-acetylpyrene	CC(=O)c1ccc2ccc3cccc4c3c2c1cc4	88	86885
294	1-acetylpiperidine-4-carboxylic acid	CC(=O)N1CCC(CC1)C(=O)O	182	104781
295	1-acetylpiperidine-4-carbonyl chloride	CC(=O)N1CCC(CC1)C(=O)Cl	132	91205
296	1-acetylpiperazine	CC(=O)N1CCNCC1	32	75616
297	1-acetylisatin	CC(=O)N1c2ccccc2C(=O)C1=O	142	10845
298	1-acetylimidazole	CC(=O)n1ccnc1	101.5	16257
299	1-acetyl-5-nitroindoline	CC(=O)N1CCc2c1ccc(c2)[N+](=O)[O-]	177	33601
300	1-acetyl-5-bromoindoline	CC(=O)N1CCc2c1ccc(c2)Br	120	630102
301	1-acetyl-5-bromo-7-nitroindoline	CC(=O)N1CCc2c1c(cc(c2)Br)[N+](=O)[O-]	197	2011202
302	1-acetyl-4-(4-hydroxyphenyl)piperazine	CC(=O)N1CCN(CC1)c2ccc(cc2)O	183	621447
303	1-acetyl-3-thiosemicarbazide	CC(=O)NNC(=S)N	167	2005796
304	1-acetyl-2-naphthol	CC(=O)c1c2ccccc2ccc1O	65	61733
305	18-pentatriacontanone	CCCCCCCCCCCCCCCCCC(=O)CCCCCCCCCCCCCCCCC	88	10009
306	18-crown-6	C1COCCOCCOCCOCCOCCO1	39	26563
307	15-hydroxypentadecanoic acid	C(CCCCCCCO)CCCCCCC(=O)O	86	70730
308	12-tricosanone	CCCCCCCCCCCC(=O)CCCCCCCCCCC	68.6	10426
309	12-hydroxystearic acid	CCCCCCC(CCCCCCCCCCC(=O)O)O	77.75	7501
310	12-aminododecanoic acid	C(CCCCCC(=O)O)CCCCCN	186	62862
311	11-heneicosanol	CCCCCCCCCCC(CCCCCCCCCC)O	72	69364
312	10-undecynoic acid	C#CCCCCCCCCC(=O)O	42	28797
313	10-undecenoic acid	C=CCCCCCCCCC(=O)O	24	10771160
314	10-phenyl-1-decanol	c1ccc(cc1)CCCCCCCCCCO	36	494547
315	10-methylphenothiazine	CN1c2ccccc2Sc3c1cccc3	102	64175
316	10-hydroxybenzo[h]quinoline	c1cc2ccc3cccnc3c2c(c1)O	104	10654645
317	10,12-tricosadiynoic acid	CCCCCCCCCCC#CC#CCCCCCCCCC(=O)O	57	468916
318	10,12-pentacosadiynoic acid	CCCCCCCCCCCCC#CC#CCCCCCCCCC(=O)O	64	468898
319	10,12-docosadiynedioic acid	C(CCCCC(=O)O)CCCC#CC#CCCCCCCCCC(=O)O	111	473642
320	10,11-dihydrocarbamazepine	c1ccc2c(c1)CCc3ccccc3N2C(=O)N	205	18028
321	1-[3,5-bis(trifluoromethyl)phenyl]pyrrole	c1ccn(c1)c2cc(cc(c2)C(F)(F)F)C(F)(F)F	42	2017857
322	1-[3,5-bis(trifluoromethyl)phenyl]ethanol	CC(c1cc(cc(c1)C(F)(F)F)C(F)(F)F)O	72	4931206
323	1,9-nonanediol	C(CCCCO)CCCCO	46.4	18685
324	1,9-diphenyl-1,3,6,8-nonatetraen-5-one	c1ccc(cc1)/C=C/C=C/C(=O)/C=C/C=C/c2ccccc2	142	4527132
325	1,9-diaminononane	C(CCCCN)CCCCN	38	62738
326	1,8-nonadiyne	C#CCCCCCC#C	-24.15	16075
327	1,8-naphthalimide	c1cc2cccc3c2c(c1)C(=O)NC3=O	301	59862
328	1,8-dichlorooctane	C(CCCCCl)CCCCl	-8	67653
329	1,8-dichloroanthraquinone	c1cc2c(c(c1)Cl)C(=O)c3c(cccc3Cl)C2=O	202	6452
330	1,8-dibenzyl-1,4,8,11-tetraazacyclotetradecane	c1ccc(cc1)CN2CCCNCCN(CCCNCC2)Cc3ccccc3	68	9351558
331	1,8-diazabicyclo[5.4.0]undec-7-ene	C1CCC2=NCCCN2CC1	-70	73246
332	1,8-diaminonaphthalene	c1cc2cccc(c2c(c1)N)N	64.75	61381
333	1,8-bis(dimethylamino)naphthalene	CN(C)c1cccc2c1c(ccc2)N(C)C	49	80012
334	1,8,9-trihydroxyanthracene	c1cc2c(c(c1)O)C(=O)c3c(cccc3O)C2	179.6	2117
335	1,7-phenanthroline	c1cc2ccc3c(c2nc1)cccn3	79	60797
336	1,7-dihydroxynaphthalene	c1cc2ccc(cc2c(c1)O)O	181.25	61739
337	1,7-diaminoheptane	C(CCCN)CCCN	28.45	62737
338	1,6-hexanedithiol	C(CCCS)CCS	-21	13836
339	1,6-hexanediol	C(CCCO)CCO	43.7	13839416
340	1,6-diphenoxy-2,4-hexadiyne	c1ccc(cc1)OCC#CC#CCOc2ccccc2	82	1414972
341	1,6-dimethoxynaphthalene	COc1ccc2c(c1)cccc2OC	59	262111
342	1,6-diisocyanatohexane	C(CCCN=C=O)CCN=C=O	-63	12637
343	1,6-dihydroxynaphthalene	c1cc2cc(ccc2c(c1)O)O	138	61740
344	1,6-dicyanohexane	C(CCCC#N)CCC#N	-3.17	11879
345	1,6-dichlorohexane	C(CCCCl)CCCl	-13	15691
346	1,6-dibromo-2-hydroxynaphthalene-3-carboxylic acid	c1cc2c(cc1Br)cc(c(c2Br)O)C(=O)O	251	67083
347	1,6-diaminohexane	C(CCCN)CCN	41	13835579
348	1,6-anhydro-beta-D-glucopyranose	C1[C@@H]2[C@H]([C@@H]([C@H]([C@H](O1)O2)O)O)O	182	9587432
349	1,5-pentanedithiol	C(CCS)CCS	-72	63421
350	1,5-pentanediol	C(CCO)CCO	-17	13839441
351	1,5-hexadiene	C=CCCC=C	-141	11110
352	1,5-dinitronaphthalene	c1cc2c(cccc2[N+](=O)[O-])c(c1)[N+](=O)[O-]	217.5	11310
353	1,5-dimethylnaphthalene	Cc1cccc2c1cccc2C	81	10831
354	1,5-dichloroanthraquinone	c1cc2c(c(c1)Cl)C(=O)c3cccc(c3C2=O)Cl	247	6455
355	1,5-dichloro-2,4-dinitrobenzene	c1c(c(cc(c1[N+](=O)[O-])Cl)Cl)[N+](=O)[O-]	101	69706
356	1,5-dibromopentane	C(CCBr)CCBr	-37.8	7809
357	1,5-diaminopentane	C(CCN)CCN	9	13866593
358	1,5-bis(diphenylphosphino)pentane	c1ccc(cc1)P(CCCCCP(c2ccccc2)c3ccccc3)c4ccccc4	47	2015213
359	1,5,5-trimethylhydantoin	CC1(C(=O)NC(=O)N1C)C	163	73350
360	1,4-piperazinedipropionitrile	C1CN(CCN1CCC#N)CCC#N	65	70204
361	1,4-phenylenediacetonitrile	c1cc(ccc1CC#N)CC#N	95.67	62536
362	1,4-phenylenediacetic acid	c1cc(ccc1CC(=O)O)CC(=O)O	254	73776
363	1,4-phenylene diisothiocyanate	c1cc(ccc1N=C=S)N=C=S	131.5	18799
364	1,4-oxazepan-5-one	C1COCCNC1=O	81	5385891
365	1,4-oxathiane 4,4-dioxide	C1CS(=O)(=O)CCO1	132	7590
366	1,4-naphthoquinone	c1ccc2c(c1)C(=O)C=CC2=O	125.67	8215
367	1,4-dithioerythritol	C([C@H]([C@H](CS)O)O)S	83	388475
368	1,4-dithio-dl-threitol	C([C@H]([C@@H](CS)O)O)S	42	393541
369	1,4-dipropionyloxybenzene	CCC(=O)Oc1ccc(cc1)OC(=O)CC	113	213630
370	1,4-diphenyl-1-butanone	c1ccc(cc1)CCCC(=O)c2ccccc2	55	71732
371	1,4-diphenoxybenzene	c1ccc(cc1)Oc2ccc(cc2)Oc3ccccc3	73	454015
372	1,4-dioxane-2,5-dione	C1C(=O)OCC(=O)O1	82	58895
373	1,4-dioxane-2,3-diol	C1COC(C(O1)O)O	101	86812
374	1,4-di-o-tosyl-2,3-o-isopropylidene-l-threitol	Cc1ccc(cc1)S(=O)(=O)OC[C@H]2[C@@H](OC(O2)(C)C)COS(=O)(=O)c3ccc(cc3)C	90	87948
375	1,4-dinitrobenzene	c1cc(ccc1[N+](=O)[O-])[N+](=O)[O-]	173.67	7211
376	1,4-dimethylpiperazine	CN1CCN(CC1)C	-1	7530
377	1,4-dimethoxynaphthalene	COc1ccc(c2c1cccc2)OC	85	74308
378	1,4-dimethoxy-2-fluorobenzene	COc1ccc(c(c1)F)OC	25	127929
379	1,4-diisopropylbenzene	CC(C)c1ccc(cc1)C(C)C	-17	7205
380	1,4-dihydroxyanthraquinone	c1ccc2c(c1)C(=O)c3c(ccc(c3C2=O)O)O	198.5	6433
381	1,4-diformylpiperazine	C1CN(CCN1C=O)C=O	128	70217
382	1,4-difluoro-2-nitrobenzene	c1cc(c(cc1F)[N+](=O)[O-])F	-12	61086
383	1,4-difluorobenzene	c1cc(ccc1F)F	-13	21108550
384	1,4-difluoro-2,5-dimethoxybenzene	COc1cc(c(cc1F)OC)F	121	2054496
385	1,4-diethylbenzene	CCc1ccc(cc1)CC	-43	7448
386	1,4-dicyclohexylbenzene	c1cc(ccc1C2CCCCC2)C3CCCCC3	104	63830
387	1,4-dichloro-2-nitrobenzene	c1cc(c(cc1Cl)[N+](=O)[O-])Cl	55	21111865
388	1,4-dichloro-5,6,7,8-tetrahydro-5,8-ethanophthalazine	C1CC2CCC1c3c2c(nnc3Cl)Cl	210	4922751
389	1,4-dichloro-2-iodobenzene	c1cc(c(cc1Cl)I)Cl	21	21171496
390	1,4-dichloro-2-fluorobenzene	c1cc(c(cc1Cl)F)Cl	4	119949
391	1,4-dibromopentane	CC(CCCBr)Br	-34	71414
392	1,4-dibromonaphthalene	c1ccc2c(c1)c(ccc2Br)Br	82	59892
393	1,4-dibromobutane	C(CCBr)CBr	-18.375	7765
394	1,4-dibromobenzene	c1cc(ccc1Br)Br	88	13868640
395	1,4-dibromo-2-nitrobenzene	c1cc(c(cc1Br)[N+](=O)[O-])Br	83.8	69450
396	1,4-dibromo-2-fluorobenzene	c1cc(c(cc1Br)F)Br	34	120721
397	1,4-dibromo-2,5-difluorobenzene	c1c(c(cc(c1Br)F)Br)F	62	60917
398	1,4-dibromo-2,5-dimethoxybenzene	COc1cc(c(cc1Br)OC)Br	146	201465
399	1,4-dibromo-2,3-butanedione	C(C(=O)C(=O)CBr)Br	118	21325
400	1,4-dibenzyloxybenzene	c1ccc(cc1)COc2ccc(cc2)OCc3ccccc3	127.5	62525
401	1,4-dibenzoylbenzene	c1ccc(cc1)C(=O)c2ccc(cc2)C(=O)c3ccccc3	163	68870
402	1,4-diazabicyclo[2.2.2]octane	C1CN2CCN1CC2	158.5	8882
403	1,4-diaminoanthraquinone	c1ccc2c(c1)C(=O)c3c(ccc(c3C2=O)N)N	265.5	29150
404	1,4-diacryloylpiperazine	C=CC(=O)N1CCN(CC1)C(=O)C=C	93	167846
405	1,4-diacetoxybutane	CC(=O)OCCCCOC(=O)C	12.5	62618
406	1,4-diacetoxy-2-butyne	CC(=O)OCC#CCOC(=O)C	28	66698
407	1,4-butanediol	C(CCO)CO	20	13835209
408	1,4-bis[(trimethylsilyl)ethynyl]benzene	C[Si](C)(C)C#Cc1ccc(cc1)C#C[Si](C)(C)C	120	455773
409	1,4-bis(trimethylsilyl)-1,3-butadiyne	C[Si](C)(C)C#CC#C[Si](C)(C)C	112	121912
410	1,4-bis(trifluoromethyl)benzene	c1cc(ccc1C(F)(F)F)C(F)(F)F	-1	61262
411	1,4-bis(phenylethynyl)benzene	c1ccc(cc1)C#Cc2ccc(cc2)C#Cc3ccccc3	177	542289
412	1,4-bis(glycidyloxy)benzene	c1cc(ccc1OCC2CO2)OCC3CO3	111	56224
413	1,4-bis(diphenylphosphino)butane	c1ccc(cc1)P(CCCCP(c2ccccc2)c3ccccc3)c4ccccc4	134	74118
414	1,4-bis(3-aminopropyl)piperazine	C1CN(CCN1CCCN)CCCN	14.5	73658
415	1,4-bis(2-phenylethyl)benzene	c1ccc(cc1)CCc2ccc(cc2)CCc3ccccc3	89	19526391
416	1,4-bis(2-methylstyryl)benzene	Cc1c(cccc1)/C=C/c2ccc(cc2)/C=C/c3c(cccc3)C	182	4527500
417	1,4-bis(2-hydroxyisopropyl)benzene	CC(CO)c1ccc(cc1)C(C)CO	144	518080
418	1,4-bis(2,2,2-trifluoroethoxy)benzene	c1cc(ccc1OCC(F)(F)F)OCC(F)(F)F	76	644220
419	1,4-bis(1-hydroxycyclohexyl)-1,3-butadiyne	C1CCC(CC1)(C#CC#CC2(CCCCC2)O)O	175	72128
420	1,4'-bipiperidine	C1CCN(CC1)C2CCNCC2	68	70964
421	1,4-benzodioxane-6-sulfonyl chloride	c1cc2c(cc1S(=O)(=O)Cl)OCCO2	66	2056491
422	1,4-benzodioxane-6-carboxaldehyde	c1cc2c(cc1C=O)OCCO2	50	217240
423	1,4-benzodioxane-2-thiocarboxamide	c1ccc2c(c1)OCC(O2)C(=S)N	174	2059317
424	1,4-benzodioxane-2-carboxylic acid	c1ccc2c(c1)OCC(O2)C(=O)O	124	2017139
425	1,4-benzodioxan-6-amine	c1cc2c(cc1N)OCCO2	28	80444
426	1,4-benzenedithiol	c1cc(ccc1S)S	97	3879447
427	1,4,8-tri-boc-1,4,8,11-tetraazacyclotetradecane	CC(C)(C)OC(=O)N1CCCNCCN(CCCN(CC1)C(=O)OC(C)(C)C)C(=O)OC(C)(C)C	51	9115276
428	1,4,8,11-tetramethyl-1,4,8,11-tetraazacyclotetradecane	CN1CCCN(CCN(CCCN(CC1)C)C)C	35	110097
429	1,4,8,11-tetrakis(ethoxycarbonylmethyl)-1,4,8,11-tetraazacyclotetradecane	CCOC(=O)CN1CCCN(CCN(CCCN(CC1)CC(=O)OCC)CC(=O)OCC)CC(=O)OCC	88	21242297
430	1,4,8,11-tetraazatricyclo[9.3.1.1(4,8)]hexadecane	C1CN2CCN3CCCN(C3)CCN(C1)C2	84	299490
431	1,4,6,7-tetramethylnaphthalene	Cc1ccc(c2c1cc(c(c2)C)C)C	64	2283071
432	1,4,5,6-tetrahydro-6-oxopyridazine-3-carboxylic acid	C1CC(=O)NN=C1C(=O)O	197	90004
433	1,4,10,13-tetrathia-7,16-diazacyclooctadecane	C1CSCCSCCNCCSCCSCCN1	130	487255
434	1,3-propanesultone	C1COS(=O)(=O)C1	32	13626
435	1,3-propanedithiol	C(CS)CS	-79	13848090
436	1,3-propanediol di-p-toluenesulfonate	Cc1ccc(cc1)S(=O)(=O)OCCCOS(=O)(=O)c2ccc(cc2)C	91	200644
437	1,3-phenylenediacetic acid	c1cc(cc(c1)CC(=O)O)CC(=O)O	175	27679
438	1,3-phenylene diisocyanate	c1cc(cc(c1)N=C=O)N=C=O	49	29002
439	1,3-dithiane	C1CSCSC1	54	10019
440	1,3-indanedione	c1ccc2c(c1)C(=O)CC2=O	130	11322
441	1,3-diphenylisobenzofuran	c1ccc(cc1)c2c3ccccc3c(o2)c4ccccc4	135	20348
442	1,3-di-tert-butylbenzene	CC(C)(C)c1cccc(c1)C(C)(C)C	10	120562
443	1,3-diphenylguanidine	c1ccc(cc1)NC(=N)Nc2ccccc2	149.5	7313
444	1,3-diphenylacetone	c1ccc(cc1)CC(=O)Cc2ccccc2	34	21105887
445	1,3-diphenyl-1-butanone	CC(CC(=O)c1ccccc1)c2ccccc2	70	120774
446	1,3-diphenoxybenzene	c1ccc(cc1)Oc2cccc(c2)Oc3ccccc3	60	69362
447	1,3-di-o-tolylguanidine	Cc1ccccc1NC(=N)Nc2ccccc2C	178	7056
448	1,3-dinitrobenzene	c1cc(cc(c1)[N+](=O)[O-])[N+](=O)[O-]	89	7172
449	1,3-di-n-butyl-2-thiobarbituric acid	CCCCN1C(=O)CC(=O)N(C1=S)CCCC	62	97639
450	1,3-dimethylbarbituric acid	CN1C(=O)CC(=O)N(C1=O)C	122	63056
451	1,3-dimethyl-6-methylamino-2,4-dioxo-1,2,3,4-tetrahydropyrimidine-5-carboxaldehyde	CNc1c(c(=O)n(c(=O)n1C)C)C=O	203	25027445
452	1,3-dimethyl-3,4,5,6-tetrahydro-2(1h)-pyrimidinone	CN1CCCN(C1=O)C	-23	73671
453	1,3-dimethyl-2,4-dioxo-7-n-propyl-2,3,4,7-tetrahydropyrrolo[2,3-d]pyrimidine-6-carboxylic acid	CCCn1c(cc2c1n(c(=O)n(c2=O)C)C)C(=O)O	139	24339378
454	1,3-dimethoxybenzene	COc1cccc(c1)OC	-52	8674
455	1,3-diiodopropane	C(CI)CI	-20	11810
456	1,3-dihydroxynaphthalene	c1ccc2c(c1)cc(cc2O)O	124.25	8282
457	1,3-dihydroxyacetone dimer	C1[C@@](OC[C@](O1)(CO)O)(CO)O	79	2005829
458	1,3-diethoxybenzene	CCOc1cccc(c1)OCC	11.7	67462
459	1,3-dichloroacetone	C(C(=O)CCl)Cl	44.5	21106513
460	1,3-dichlorobenzene	c1cc(cc(c1)Cl)Cl	-25	13857694
461	1,3-dichloro-5-nitrobenzene	c1c(cc(cc1Cl)Cl)[N+](=O)[O-]	64.7	11567
462	1,3-dichloro-4-fluorobenzene	c1cc(c(cc1Cl)Cl)F	-23	109728
463	1,3-dichloro-5,5-dimethylhydantoin	CC1(C(=O)N(C(=O)N1Cl)Cl)C	133	8057
464	1,3-dichloro-2-nitrosobenzene	c1cc(c(c(c1)Cl)N=O)Cl	172	452373
465	1,3-dichloro-2-propanol	C(C(CCl)O)Cl	-4	21106535
466	1,3-dibromopropane	C(CBr)CBr	-34	7710
467	1,3-dichloro-2-fluorobenzene	c1cc(c(c(c1)Cl)F)Cl	38	121182
468	1,3-dibromo-5-fluoro-2-iodobenzene	c1c(cc(c(c1Br)I)Br)F	134	2006733
469	1,3-dibromobenzene	c1cc(cc(c1)Br)Br	-7	13875356
470	1,3-dibromo-2,2-diethylpropane	CCC(CC)(CBr)CBr	40	95701
471	1,3-dibromo-2,2-dimethoxypropane	COC(CBr)(CBr)OC	66	2015952
472	1,3-dibenzoyloxybenzene	c1ccc(cc1)C(=O)Oc2cccc(c2)OC(=O)c3ccccc3	117	60108
473	1,3-dibenzyl-5-cyanohexahydropyrimidine	c1ccc(cc1)CN2CC(CN(C2)Cc3ccccc3)C#N	80	2084548
474	1,3-diamino-2-propanol	C(C(CN)O)N	43	55104
475	1,3-diaminopropane	C(CN)CN	-12	415
476	1,3-dibenzoylbenzene	c1ccc(cc1)C(=O)c2cccc(c2)C(=O)c3ccccc3	99	69801
477	1,3-diacetylbenzene	CC(=O)c1cccc(c1)C(=O)C	34	21733
478	1,3-diacetylindole	CC(=O)c1cn(c2c1cccc2)C(=O)C	146	78616
479	1,3-di(4-pyridyl)propane	c1cnccc1CCCc2ccncc2	55	78494
480	1,3-di-2-thienyl-2-propen-1-one	c1cc(sc1)C=CC(=O)c2cccs2	99	88366
481	1,3-cyclooctadiene	C1C/C=CC=C/CC1	-53	264937
482	1,3-cyclopentanedione	C1CC(=O)CC1=O	152	69875
483	1,3-cyclohexanedione	C1CC(=O)CC(=O)C1	104.25	10004
484	1,3-bis[tris(hydroxymethyl)methylamino]propane	C(CNC(CO)(CO)CO)CNC(CO)(CO)CO	169	111383
485	1,3-cyclohexadiene	C1CC=CC=C1	-89	11117
486	1,3-cyclohexanediol, cis trans	C1CC(CC(C1)O)O	30	10003
487	1,3-bis(trifluoromethyl)benzene	c1cc(cc(c1)C(F)(F)F)C(F)(F)F	-35	21111807
488	1,3-bis[(trimethylsilyl)ethynyl]benzene	C[Si](C)(C)C#Cc1cccc(c1)C#C[Si](C)(C)C	58	125472
489	1,3-bis(2-hydroxyhexafluoroisopropyl)benzene	c1cc(cc(c1)C(C(F)(F)F)(C(F)(F)F)O)C(C(F)(F)F)(C(F)(F)F)O	10	63127
490	1,3-bis(4-piperidinyl)propane	C1CNCCC1CCCC2CCNCC2	66.55	77230
491	1,3-benzenedisulfonyl chloride	c1cc(cc(c1)S(=O)(=O)Cl)S(=O)(=O)Cl	59	86880
492	1,3-benzodioxole	c1ccc2c(c1)OCO2	-18	13881169
493	1,3,5-tri-tert-butylbenzene	CC(C)(C)c1cc(cc(c1)C(C)(C)C)C(C)(C)C	71	14361
494	1,3,5-triphenylbenzene	c1ccc(cc1)c2cc(cc(c2)c3ccccc3)c4ccccc4	173	11436
495	1,3,5-tris(2-hydroxyethyl)cyanuric acid	C(CO)n1c(=O)n(c(=O)n(c1=O)CCO)CCO	138	12726
496	1,3,5-trimethyl-1h-pyrazole-4-carboxaldehyde	Cc1c(c(n(n1)C)C)C=O	82	643636
497	1,3,5-trimethyl-1h-pyrazole	Cc1cc(n(n1)C)C	36	13461
498	1,3,5-triisopropylbenzene	CC(C)c1cc(cc(c1)C(C)C)C(C)C	-7.2	12329
499	1,3,5-trimethoxy-2-nitrobenzene	COc1cc(c(c(c1)OC)[N+](=O)[O-])OC	152	452664
500	1,3,5-triethynylbenzene	C#Cc1cc(cc(c1)C#C)C#C	106	122640
501	1,3,5-trichloro-2-iodobenzene	c1c(cc(c(c1Cl)I)Cl)Cl	55	202232
502	1,3,5-trichloro-2-nitrobenzene	c1c(cc(c(c1Cl)[N+](=O)[O-])Cl)Cl	71.67	27183
503	1,3,5-tribromobenzene	c1c(cc(cc1Br)Br)Br	123	11776
504	1,3,5-trichloro-2,4,6-trifluorobenzene	c1(c(c(c(c(c1Cl)F)Cl)F)Cl)F	63	60895
505	1,3,5-tribenzoylbenzene	c1ccc(cc1)C(=O)c2cc(cc(c2)C(=O)c3ccccc3)C(=O)c4ccccc4	118	124594
506	1,3,5-tribenzylhexahydro-1,3,5-triazine	c1ccc(cc1)CN2CN(CN(C2)Cc3ccccc3)Cc4ccccc4	50	68203
507	1,3,5-benzenetricarbonyl chloride	c1c(cc(cc1C(=O)Cl)C(=O)Cl)C(=O)Cl	36	70514
508	1,3,5-benzenetricarboxylic acid	c1c(cc(cc1C(=O)O)C(=O)O)C(=O)O	375	10665
509	1,3,3-trimethyl-2-methyleneindoline	CC1(c2ccccc2N(C1=C)C)C	-10	8048
510	1,2-propanediol diacetate	CC(COC(=O)C)OC(=O)C	-31	11698
511	1,2-phenylenediacetic acid	c1ccc(c(c1)CC(=O)O)CC(=O)O	151	22547
512	1,2-phenylenediacetonitrile	c1ccc(c(c1)CC#N)CC#N	59	62395
513	1,2-o-isopropylidene-alpha-D-glucofuranose	CC1(O[C@@H]2[C@H]([C@H](O[C@@H]2O1)[C@@H](CO)O)O)C	160	79123
514	1,2-phenylene phosphorochloridite	c1ccc2c(c1)OP(O2)Cl	30	66839
515	1,2-ethylenediphosphonic acid	C(=C/P(=O)(O)O)P(=O)(O)O	219	10454862
516	1,2-octanediol	CCCCCCC(CO)O	31	13595
517	1,2-epoxyoctadecane	CCCCCCCCCCCCCCCCC1CO1	29.5	22319
518	1,2-ethanedithiol	C(CS)S	-41	13865015
519	1,2-diphenoxyethane	c1ccc(cc1)OCCOc2ccccc2	96	7427
520	1,2-diphenylethane	c1ccc(cc1)CCc2ccccc2	52.2	7364
521	1,2-dimethylimidazole	Cc1nccn1C	37	14857
522	1,2-dimethoxy-4,5-dinitrobenzene	COc1cc(c(cc1OC)[N+](=O)[O-])[N+](=O)[O-]	133	193623
523	1,2-dihydronaphthalene	c1ccc2c(c1)CCC=C2	-8	9550
524	1,2-diethylbenzene	CCc1ccccc1CC	-31	8335
525	1,2-difluoro-4,5-dimethoxybenzene	COc1cc(c(cc1OC)F)F	40	745601
526	1,2-diethoxybenzene	CCOc1ccccc1OCC	43.67	67466
527	1,2-diethoxyethane	CCOCCOCC	-74	13835376
528	1,2-dichloropropane	CC(CCl)Cl	-100	6316
529	1,2-dichloro-4-iodobenzene	c1cc(c(cc1I)Cl)Cl	30	79934
530	1,2-dichloro-4-nitrobenzene	c1cc(c(cc1[N+](=O)[O-])Cl)Cl	41	21106095
531	1,2-dichloro-3-nitrobenzene	c1cc(c(c(c1)Cl)Cl)[N+](=O)[O-]	62	21106574
532	1,2-dichloro-4-fluorobenzene	c1cc(c(cc1F)Cl)Cl	-1	66649
533	1,2-dibromopropane	CC(CBr)Br	-55	6305
534	1,2-dichloro-3-iodobenzene	c1cc(c(c(c1)I)Cl)Cl	35	67989
535	1,2-dibromobutane	CCC(CBr)Br	-65	21171408
536	1,2-dibromoethane	C(CBr)Br	10	7551
537	1,2-dibromo-4,5-difluorobenzene	c1c(c(cc(c1Br)Br)F)F	33	85671
538	1,2-dibromobenzene	c1ccc(c(c1)Br)Br	6.4	13875212
539	1,2-dibromo-2,4-dicyanobutane	C(CC(CBr)(C#N)Br)C#N	51	55806
540	1,2-dibromo-3,5-difluorobenzene	c1c(cc(c(c1F)Br)Br)F	37	2006650
541	1,2-dianilinoethane	c1ccc(cc1)NCCNc2ccccc2	70	60747
542	1,2-dibenzoylbenzene	c1ccc(cc1)C(=O)c2ccccc2C(=O)c3ccccc3	147	64038
543	1,2-dibenzoylethane	c1ccc(cc1)C(=O)CCC(=O)c2ccccc2	145	120096
544	1,2-di(p-tolyl)ethane	Cc1ccc(cc1)CCc2ccc(cc2)C	81.33	10397
545	1,2-diaminopropane	CC(CN)N	-37	13849260
546	1,2-cyclohexanedione	C1CCC(=O)C(=O)C1	38.5	12465
547	1,2-di(3-indenyl)ethane	c1ccc2c(c1)CC=C2CCC3=CCc4c3cccc4	123	2728677
548	1,2-bis(phenylthio)ethane	c1ccc(cc1)SCCSc2ccccc2	69	62527
549	1,2-bis[2-(trifluoromethyl)phenyl]ethane	c1ccc(c(c1)CCc2ccccc2C(F)(F)F)C(F)(F)F	75	2053655
550	1,2-bis(phenylsulfonyl)ethane	c1ccc(cc1)S(=O)(=O)CCS(=O)(=O)c2ccccc2	180	62258
551	1,2-bis(diphenylphosphino)ethane	c1ccc(cc1)P(CCP(c2ccccc2)c3ccccc3)c4ccccc4	141	66873
552	1,2-bis(methanesulfonamido)benzene	CS(=O)(=O)Nc1ccccc1NS(=O)(=O)C	213	197743
553	1,2-bis(dimethylphosphino)ethane	CP(C)CCP(C)C	180	124423
554	1,2-bis(diphenylphosphino)benzene	c1ccc(cc1)P(c2ccccc2)c3ccccc3P(c4ccccc4)c5ccccc5	187	436234
555	1,2-bis(carboxymethylthio)ethane	C(CSCC(=O)O)SCC(=O)O	110	274870
556	1,2-bis(chlorodimethylsilyl)ethane	C[Si](C)(CC[Si](C)(C)Cl)Cl	37	75384
557	1,2-bis(dimethoxyphosphoryl)benzene	COP(=O)(c1ccccc1P(=O)(OC)OC)OC	81	2014960
558	1,2-bis(2-chloroethoxy)ethane	C(COCCCl)OCCCl	-32	7879
559	1,2-bis(2-nitrophenoxy)ethane	c1ccc(c(c1)[N+](=O)[O-])OCCOc2ccccc2[N+](=O)[O-]	169	349757
560	1,2-benzisoxazol-3(2h)-one	c1ccc2c(c1)c(=O)[nH]o2	139	182761
561	1,2-bis(1-naphthyl)ethane	c1ccc2c(c1)cccc2CCc3cccc4c3cccc4	162	123404
562	1,2-benzenedimethanol	c1ccc(c(c1)CO)CO	63	62368
563	1,2-benzenedithiol	c1ccc(c(c1)S)S	26.2	13840080
564	1,2,5-trichloro-3-iodobenzene	c1c(cc(c(c1Cl)Cl)I)Cl	52	14966534
565	1,2,6-hexanetriol	C(CCO)CC(CO)O	-20	7535
566	1,2,4-trimethylbenzene	Cc1ccc(c(c1)C)C	-44	6977
567	1,2,4-triphenyl-1,4-butanedione	c1ccc(cc1)C(CC(=O)c2ccccc2)C(=O)c3ccccc3	128	86109
568	1,2,4-trichlorobenzene	c1cc(c(cc1Cl)Cl)Cl	17	13862559
569	1,2,4-tribromobenzene	c1cc(c(cc1Br)Br)Br	43.42	11507
570	1,2,4-trichloro-5-iodobenzene	c1c(c(cc(c1Cl)I)Cl)Cl	104	221527
571	1,2,4-triazole	c1[nH]ncn1	120	8900
572	1,2,4-triazolo[4,3-a]pyridin-3(2h)-one	c1ccn2c(c1)n[nH]c2=O	234	73475
573	1,2,4-triazolo[4,3-a]pyridine-3-thiol	c1ccn2c(c1)nnc2S	210	589135
574	1,2,4-butanetriol	C(CO)C(CO)O	-20	17287
575	1,2,4-triacetoxybenzene	CC(=O)Oc1ccc(c(c1)OC(=O)C)OC(=O)C	99	62384
576	1,2,4-benzenetricarboxylic anhydride	c1cc2c(cc1C(=O)O)C(=O)OC2=O	164.5	10618
577	1,2,4,5-tetrakis(isopropylthio)benzene	CC(C)Sc1cc(c(cc1SC(C)C)SC(C)C)SC(C)C	77	549629
578	1,2,3-thiadiazole-4-carboxylic acid	c1c(nns1)C(=O)O	228	312024
579	1,2,3-triacetoxybenzene	CC(=O)Oc1cccc(c1OC(=O)C)OC(=O)C	166	10228
580	1,2,3-hexanetriol	CCCC(C(CO)O)O	66	2006570
581	1,2,3-thiadiazole-4-carboxaldehyde	c1c(nns1)C=O	85	2018914
582	1,2,3,4-tetrahydroquinoline	c1ccc2c(c1)CCCN2	17	62667
583	1,2,3-benzotriazin-4(3h)one	c1ccc2c(c1)c(=O)nn[nH]2	220	6740
584	1,2,3,4-tetrahydronaphthalene	c1ccc2c(c1)CCCC2	-34.42	8097
585	1,2,3,4-tetrahydrocarbazole	c1ccc2c(c1)c3c([nH]2)CCCC3	119	13075
586	1,2,3,4-tetrahydroisoquinoline	c1ccc2c(c1)CCNC2	-30	6779
587	1,1'-thiocarbonyldi-2(1h)-pyridone	c1ccn(c(=O)c1)C(=S)n2ccccc2=O	165	745588
588	1,2,3,4-tetrafluorobenzene	c1cc(c(c(c1F)F)F)F	-42	21106162
589	1,1-diphenylethanol	CC(c1ccccc1)(c2ccccc2)O	80	62253
590	1,1-diphenylethylene	C=C(c1ccccc1)c2ccccc2	7.4	10287
591	1,1-diphenyl-2-propyn-1-ol	C#CC(c1ccccc1)(c2ccccc2)O	46	83929
592	1,1-cyclopropanedicarboxylic acid monomethyl ester	COC(=O)C1(CC1)C(=O)O	49	11343278
593	1,1-dioxobenzo[b]thiophen-2-ylmethyl chloroformate	c1ccc2c(c1)C=C(S2(=O)=O)COC(=O)Cl	77	3758400
594	1,1-cyclohexanediacetic acid	C1CCC(CC1)(CC(=O)O)CC(=O)O	180	70440
595	1,1-cyclopropanedicarboxylic acid	C1CC1(C(=O)O)C(=O)O	132	62239
596	1,1'-carbonyldiimidazole	c1cn(cn1)C(=O)n2ccnc2	118.5	61561
597	1,1'-carbonyldipiperidine	C1CCN(CC1)C(=O)N2CCCCC2	45	20200
598	1,1-bis(methylthio)-2-nitroethylene	CSC(=C[N+](=O)[O-])SC	126	75448
599	1,12-diaminododecane	C(CCCCCCN)CCCCCN	70	16755
600	1,10-diiododecane	C(CCCCCI)CCCCI	30	77001
601	1,10-decanedithiol	C(CCCCCS)CCCCS	17	13839
602	1,10-dibromodecane	C(CCCCCBr)CCCCBr	28	192166
603	1,10-decanedicarbonitrile	C(CCCCCC#N)CCCCC#N	18	70673
604	1,10-decanediol	C(CCCCCO)CCCCO	73	34095
605	1,1,4,4-tetraphenyl-1,3-butadiene	c1ccc(cc1)C(=CC=C(c2ccccc2)c3ccccc3)c4ccccc4	198	66678
606	1,1':3',1''-terphenyl-5'-boronic acid	B(c1cc(cc(c1)c2ccccc2)c3ccccc3)(O)O	294	11207057
607	1,1,3,3-tetramethyldisiloxane	C[SiH](C)O[SiH](C)C	-78	17619
608	1,1,3-triphenylpropargyl alcohol	c1ccc(cc1)C#CC(c2ccccc2)(c3ccccc3)O	81	120767
609	1,1,2-trimethyl-1h-benzo[e]indole	CC1=Nc2ccc3ccccc3c2C1(C)C	117	149093
610	1,1,3,3,5,5-hexamethyltrisiloxane	C[SiH](C)O[Si](C)(C)O[SiH](C)C	-67	64083
611	1,1,2,2-tetrafluoroethyl methyl ether	COC(C(F)F)(F)F	-107	61243
612	1,1,2-trichloro-3,3,3-trifluoro-1-propene	C(=C(Cl)Cl)(C(F)(F)F)Cl	-114	61255
613	1,1,1-tris(chloromethyl)ethane	CC(CCl)(CCl)CCl	18	120577
614	1,1'-(azodicarbonyl)dipiperidine	C1CCN(CC1)C(=O)N=NC(=O)N2CCCCC2	135	65839
615	1,1,1,2-tetrafluoro-2-iodo-2-(trifluoromethoxy)ethane	C(C(F)(F)F)(OC(F)(F)F)(F)I	44	478689
616	1-(trimethylsilyl)imidazole	C[Si](C)(C)n1ccnc1	-42	26905
617	1-(trifluoromethyl)cyclohexanecarboxylic acid	C1CCC(CC1)(C(=O)O)C(F)(F)F	70	13812905
618	1-(trifluoromethyl)cyclopentanecarboxylic acid	C1CCC(C1)(C(=O)O)C(F)(F)F	37	21242252
619	1-(p-toluenesulfonyl)pyrrole	Cc1ccc(cc1)S(=O)(=O)n2cccc2	101	555466
620	1-(trans-cinnamoyl)imidazole	c1ccc(cc1)/C=C/C(=O)n2ccnc2	130	4512938
621	1-(phenylsulfonyl)pyrrole	c1ccc(cc1)S(=O)(=O)n2cccc2	89	123597
622	1-(p-toluenesulfonyl)indole	Cc1ccc(cc1)S(=O)(=O)n2ccc3c2cccc3	85	9131833
623	1-(phenylethynyl)cyclohexanol	c1ccc(cc1)C#CC2(CCCCC2)O	61	516171
624	1-(phenylsulfonyl)indole	c1ccc(cc1)S(=O)(=O)n2ccc3c2cccc3	78	278699
625	1-(pentafluorobenzoyl)imidazole	c1cn(cn1)C(=O)c2c(c(c(c(c2F)F)F)F)F	56	91105
626	1-(pentafluorophenyl)ethanol	CC(c1c(c(c(c(c1F)F)F)F)F)O	33	88752
627	1-(methylsulfonyl)imidazole	CS(=O)(=O)n1ccnc1	89	454456
628	1-(o-tolyl)piperazine	Cc1ccccc1N2CCNCC2	47	83039
629	1-(cyanoacetyl)pyrrolidine	C1CCN(C1)C(=O)CC#N	73	76026
630	1-(heptafluorobutyryl)imidazole	c1cn(cn1)C(=O)C(C(C(F)(F)F)(F)F)(F)F	11	85218
631	1-(cyanoacetyl)piperidine	C1CCN(CC1)C(=O)CC#N	88	76469
632	1-(6-methoxy-2-naphthyl)ethanol	CC(c1ccc2cc(ccc2c1)OC)O	112	500377
633	1-(boc-amino)cyclopentanecarboxylic acid	CC(C)(C)OC(=O)NC1(CCCC1)C(=O)O	133	2016389
634	1-(4-pyridyl)piperazine	c1cnccc1N2CCNCC2	139	63689
635	1-(4-nitrophenyl)piperidine	c1cc(ccc1N2CCCCC2)[N+](=O)[O-]	104	73122
636	1-(4-nitrophenyl)glycerol	c1cc(ccc1[N+](=O)[O-])OCC(CO)O	96	3857991
637	1-(4-nitrophenyl)piperazine	c1cc(ccc1N2CCNCC2)[N+](=O)[O-]	131	72658
638	1-(4-nitrophenyl)-5-(trifluoromethyl)-1h-pyrazole-4-carboxylic acid	c1cc(ccc1n2c(c(cn2)C(=O)O)C(F)(F)F)[N+](=O)[O-]	201	600104
639	1-(4-nitrophenyl)-3-(2-thienyl)-2-propen-1-one	c1cc(sc1)C=CC(=O)c2ccc(cc2)[N+](=O)[O-]	169	334131
640	1-(4-methoxyphenyl)ethynyl-4-n-propylbenzene	CCCc1ccc(cc1)C#Cc2ccc(cc2)OC	61	14032575
641	1-(4-methoxyphenyl)imidazole	COc1ccc(cc1)n2ccnc2	66	74299
642	1-(4-methoxyphenyl)-1h-1,2,4-triazole	COc1ccc(cc1)n2cncn2	97	9259536
643	1-(4-methoxyphenyl)ethynyl-4-n-pentylbenzene	CCCCCc1ccc(cc1)C#Cc2ccc(cc2)OC	47	533372
644	1-(4-methoxybenzoyl)-2-(1-naphthoyl)hydrazine	COc1ccc(cc1)C(=O)NNC(=O)c2cccc3c2cccc3	189	87368
645	1-(4-methoxyphenyl)-1-cyclohexanecarbonitrile	COc1ccc(cc1)C2(CCCCC2)C#N	43	89072
646	1-(4-iodophenyl)pyrrole	c1ccn(c1)c2ccc(cc2)I	131	239679
647	1-(4'-methoxy-4-biphenylylsulfonyl)proline	COc1ccc(cc1)c2ccc(cc2)S(=O)(=O)N3CCCC3C(=O)O	154	21476893
648	1-(4-hydroxyphenyl)-5-mercaptotetrazole	c1cc(ccc1n2c(nnn2)S)O	170	2299139
649	1-(4-fluorophenyl)pyrrole	c1ccn(c1)c2ccc(cc2)F	51	635630
650	1-(4-ethoxyphenyl)ethanol	CCOc1ccc(cc1)C(C)O	47	11422388
651	1-(4-ethoxyphenyl)ethynyl-4-n-pentylbenzene	CCCCCc1ccc(cc1)C#Cc2ccc(cc2)OCC	62	530457
652	1-(4-chlorophenyl)cyclopropanecarboxylic acid	c1cc(ccc1C2(CC2)C(=O)O)Cl	154	89051
653	1-(4-chlorophenylsulfonyl)-3,3-dimethyl-2-butanone	CC(C)(C)C(=O)CS(=O)(=O)c1ccc(cc1)Cl	97	474542
654	1-(4-chlorophenyl)cyclohexane-1-carboxylic acid	c1cc(ccc1C2(CCCCC2)C(=O)O)Cl	152	91139
655	1-(4-biphenylyl)ethanol	CC(c1ccc(cc1)c2ccccc2)O	97	86818
656	1-(4-bromophenyl)ethanol	CC(c1ccc(cc1)Br)O	37	86049
657	1-(3-trifluoromethylphenoxy)-3-butyn-2-ol	C#CC(COc1cccc(c1)C(F)(F)F)O	32	9347348
658	1-(4-aminophenyl)ethanol	CC(c1ccc(cc1)N)O	70	77344
659	1-(3-methoxybenzoyl)-2-(1-naphthoyl)hydrazine	COc1cccc(c1)C(=O)NNC(=O)c2cccc3c2cccc3	190	47695
660	1-(3-chlorophenoxy)-3-butyn-2-ol	C#CC(COc1cccc(c1)Cl)O	38	13615529
661	1-(3-hydroxypropyl)piperazine	C1CN(CCN1)CCCO	50	71532
662	1-(3-aminophenyl)ethanol	CC(c1cccc(c1)N)O	68	193129
663	1-(3-aminopropyl)imidazole	c1cn(cn1)CCCN	-68	71079
664	1-(3,4-dimethylphenyl)piperazine	Cc1ccc(cc1C)N2CCNCC2	63	2005973
665	1-(3,5-dichlorophenyl)-2,5-dimethyl-1h-pyrrole	Cc1ccc(n1c2cc(cc(c2)Cl)Cl)C	79	8665595
666	1-(2-trifluoromethylphenyl)imidazole	c1ccc(c(c1)C(F)(F)F)n2ccnc2	52	1318
667	1-(3,4-dichlorophenyl)piperazine	c1cc(c(cc1N2CCNCC2)Cl)Cl	63	84495
668	1-(2-thiazolylazo)-2-naphthol	c1ccc2c(c1)ccc(c2N=Nc3nccs3)O	139	21171804
669	1-(2-phenylethyl)-4-piperidone	c1ccc(cc1)CCN2CCC(=O)CC2	58	87058
670	1-(2-pyridylazo)-2-naphthol	c1ccc2c(c1)ccc(c2N=Nc3ccccn3)O	140	17967090
671	1-(2-phenylethyl)-4-(phenylethynyl)benzene	c1ccc(cc1)CCc2ccc(cc2)C#Cc3ccccc3	105	19526413
672	1-(2-nitrophenyl)piperidine	c1ccc(c(c1)N2CCCCC2)[N+](=O)[O-]	77	195994
673	1-(2-nitrophenyl)pyrrole	c1ccc(c(c1)n2cccc2)[N+](=O)[O-]	59	454115
674	1-(2-naphthoyl)-3,3,3-trifluoroacetone	c1ccc2cc(ccc2c1)C(=O)CC(=O)C(F)(F)F	74	63365
675	1-(2-naphthyl)ethanol	CC(c1ccc2ccccc2c1)O	74	88713
676	1-(2-methoxyphenyl)piperazine	COc1ccccc1N2CCNCC2	37	1306
677	1-(2-hydroxyethyl)piperidine	C1CCN(CC1)CCO	16.95	17221
678	1-(2-methoxyethyl)homopiperazine	COCCN1CCCNCC1	67	16815626
679	1-(2-hydroxyethyl)-2-imidazolidinone	C1CN(C(=O)N1)CCO	49	69710
680	1-(2-hydroxyethyl)piperazine	C1CN(CCN1)CCO	-39	7394
681	1-(2-furyl)-2-nitroethylene	c1cc(oc1)/C=C/[N+](=O)[O-]	74	598925
682	1-(2-fluorophenyl)piperazine	c1ccc(c(c1)N2CCNCC2)F	46	63700
683	1-(2-furoyl)piperazine	c1cc(oc1)C(=O)N2CCNCC2	68	478652
684	1-(2-aminophenyl)pyrrole	c1ccc(c(c1)N)n2cccc2	94	72372
685	1-(2-bromoethyl)-4-nitrobenzene	c1cc(ccc1CCBr)[N+](=O)[O-]	69	71591
686	1-(2,5-dimethylphenyl)piperazine	Cc1ccc(c(c1)N2CCNCC2)C	45	63713
687	1-(2,4-difluorophenyl)piperazine	c1cc(c(cc1F)F)N2CCNCC2	75	2016381
688	1-(1-propynyl)cyclohexanol	CC#CC1(CCCCC1)O	48	200616
689	1-(2,4,6-triisopropylphenylsulfonyl)-1,2,4-triazole	CC(C)c1cc(c(c(c1)C(C)C)S(=O)(=O)n2cncn2)C(C)C	111	600068
690	[4-(trifluoromethyl)phenylthio]acetic acid	c1cc(ccc1C(F)(F)F)SCC(=O)O	116	4496961
691	1-(1-methyl-4-piperidinyl)piperazine	CN1CCC(CC1)N2CCNCC2	31	492301
692	[4-(trifluoromethyl)phenylsulfonyl]acetonitrile	c1cc(ccc1C(F)(F)F)S(=O)(=O)CC#N	144	13609083
693	(trimethylsilyl)acetic acid	C[Si](C)(C)CC(=O)O	41	67902
694	[2.2]paracyclophane	c1cc2ccc1CCc3ccc(cc3)CC2	286	66818
695	(S)-nicotine	CN1CCC[C@H]1c2cccnc2	-79	80863
696	(S,s)-hydrobenzoin	c1ccc(cc1)[C@@H]([C@H](c2ccccc2)O)O	149	745457
697	(S)-4-sec-butyloxazolidine-2,5-dione	CCC(C)[C@H]1C(=O)OC(=O)N1	66	8550125
698	(S)-alpha-methoxy-alpha-(trifluoromethyl)phenylacetic acid	CO[C@@](c1ccccc1)(C(=O)O)C(F)(F)F	44	5360910
699	(S)-3-(boc-amino)piperidine	CC(C)(C)OC(=O)N[C@H]1CCCNC1	125	1246019
700	(S)-3-boc-thiazolidine-2-carboxylic acid	CC(C)(C)OC(=O)N1CCS[C@H]1C(=O)O	92	16498319
701	(S)-3-(boc-amino)-5-methylhexanoic acid	CC(C)C[C@@H](CC(=O)O)NC(=O)OC(C)(C)C	54	2042254
702	(S)-3-(boc-amino)-4-(4-pyridyl)butyric acid	CC(C)(C)OC(=O)N[C@@H](Cc1ccncc1)CC(=O)O	142	2042378
703	(S)-3-(boc-amino)-4-phenylbutyric acid	CC(C)(C)OC(=O)N[C@@H](Cc1ccccc1)CC(=O)O	104	2042266
704	(S)-2-(boc-amino)-4-phenylbutyric acid	CC(C)(C)OC(=O)N[C@@H](CCc1ccccc1)C(=O)O	78	5381700
705	(S)-1-boc-3-hydroxypiperidine	CC(C)(C)OC(=O)N1CCC[C@@H](C1)O	37	1246131
706	(R)-limonene	CC1=CC[C@@H](CC1)C(=C)C	-74	389747
707	(R)-3-(boc-amino)-3-(4-bromophenyl)propionic acid	CC(C)(C)OC(=O)N[C@H](CC(=O)O)c1ccc(cc1)Br	144	5372727
708	(R)-3-boc-thiazolidine-2-carboxylic acid	CC(C)(C)OC(=O)N1CCS[C@@H]1C(=O)O	92	17346169
709	(R)-1-boc-3-hydroxypiperidine	CC(C)(C)OC(=O)N1CCC[C@H](C1)O	47	1246130
710	(phenylsulfonyl)acetic acid	c1ccc(cc1)S(=O)(=O)CC(=O)O	112	53708
711	(pentafluorophenyl)diphenylphosphine	c1ccc(cc1)P(c2ccccc2)c3c(c(c(c(c3F)F)F)F)F	71	265587
712	(phenylsulfonyl)acetamide	c1ccc(cc1)S(=O)(=O)CC(=O)N	156	1414960
713	(methylamino)acetaldehyde dimethyl acetal	CNCC(OC)OC	-73	21159479
714	(methylthio)acetic acid	CSCC(=O)O	14	68076
715	(e)-alpha-methylstilbene	C/C(=Cc1ccccc1)/c2ccccc2	81	1266121
716	(methoxymethyl)diphenylphosphine oxide	COCP(=O)(c1ccccc1)c2ccccc2	117	70579
717	(e)-3-dimethylamino-1-(2-pyridyl)-2-propen-1-one	CN(C)/C=C/C(=O)c1ccccn1	131	4520289
718	(e)-alpha-(4-chlorophenyl)cinnamonitrile	c1ccc(cc1)/C=C(/C#N)c2ccc(cc2)Cl	116	643361
719	(chloromethyl)cyclopropane	C1CC1CCl	-91	72268
720	(4-tert-butylphenoxy)acetonitrile	CC(C)(C)c1ccc(cc1)OCC#N	69	20508810
721	(5-mercapto-1,3,4-thiadiazol-2-ylthio)acetic acid	C(C(=O)O)Sc1nnc(s1)S	167	1363182
722	(4-fluorophenylthio)acetonitrile	c1cc(ccc1F)SCC#N	34	505346
723	(4-imidazolyl)acetonitrile	c1c(nc[nH]1)CC#N	137	497324
724	(4-fluorophenylthio)acetic acid	c1cc(ccc1F)SCC(=O)O	78	643329
725	(4-chlorophenylthio)acetic acid	c1cc(ccc1SCC(=O)O)Cl	106	50091
726	(4-chlorophenylthio)acetonitrile	c1cc(ccc1SCC#N)Cl	80	2058630
727	(4-chlorophenylsulfonyl)acetonitrile	c1cc(ccc1S(=O)(=O)CC#N)Cl	171	642983
728	(4-chlorophenoxy)acetyl chloride	c1cc(ccc1OCC(=O)Cl)Cl	19	70168
729	(3S,4R)-4-(4-fluorophenyl)-1-methyl-3-piperidinemethanol	CN1CC[C@H]([C@@H](C1)CO)c2ccc(cc2)F	96	2015974
730	(3R-cis)-tetrahydro-3-trichloromethyl-1h,3h-pyrrolo[1,2-c]oxazol-1-one	C1C[C@H]2C(=O)O[C@@H](N2C1)C(Cl)(Cl)Cl	110	9119906
731	(3-chloropropyl)trimethoxysilane	CO[Si](CCCCl)(OC)OC	-50	56230
732	(3,4-dimethoxyphenylthio)acetic acid	COc1ccc(cc1OC)SCC(=O)O	102	633075
733	(3-bromo-2,4,6-trimethylphenylcarbamoyl)methyliminodiacetic acid	Cc1cc(c(c(c1NC(=O)CN(CC(=O)O)CC(=O)O)C)Br)C	196.5	48922
734	(2S,5s)-2,5-hexanediol	C[C@@H](CC[C@H](C)O)O	53	5323234
735	(2-hydroxyethyl)hydrazine	C(CO)NN	-70	7726
736	(2-carboxyphenyl)iminodiacetic acid	c1ccc(c(c1)C(=O)O)N(CC(=O)O)CC(=O)O	217	404243
737	(2h)1,4-benzothiazin-3(4h)-one	c1ccc2c(c1)NC(=O)CS2	177	20108
738	(2-aminoethoxy)acetic acid	C(COCC(=O)O)N	178	9346048
739	(2-bromoethyl)benzene	c1ccc(cc1)CCBr	60.85	7383
740	(1S,4S)-2-boc-2,5-diazabicyclo[2.2.1]heptane	CC(C)(C)OC(=O)N1C[C@@H]2C[C@H]1CN2	75	9696050
741	(1S,2R)-1-phenyl-2-(1-pyrrolidinyl)-1-propanol	C[C@H]([C@H](c1ccccc1)O)N2CCCC2	45	8118095
742	(1S,2R)-10,2-camphorsultam	CC1([C@@H]2CC[C@]13CS(=O)(=O)N[C@@H]3C2)C	183	746406
743	(1S)-camphorsulfonylimine	CC1([C@@H]2CC[C@]13CS(=O)(=O)N=C3C2)C	227	628271
744	(1S)-camphorquinone	C[C@]12CC[C@H](C1(C)C)C(=O)C2=O	199	16737174
745	(1S)-camphor-10-sulfonyl chloride	CC1([C@@H]2CC[C@]1(C(=O)C2)CS(=O)(=O)Cl)C	66	80176
746	(1S)-camphor	C[C@]12CC[C@H](C1(C)C)CC2=O	179	392267
747	(1S)-camphanic chloride	C[C@@]12CC[C@@](C1(C)C)(OC2=O)C(=O)Cl	66	148847
748	(1R,3S)-camphoric acid	C[C@]1(CC[C@@H](C1(C)C)C(=O)O)C(=O)O	186	91985
749	(1S)-camphanic acid	CC1(C2(CCC1(OC2=O)C(=O)O)C)C	200	102572
750	(1R,2s)-10,2-camphorsultam	CC1([C@H]2CC[C@@]13CS(=O)(=O)N[C@H]3C2)C	181	628224
751	(1R)-camphorquinone	C[C@@]12CC[C@@H](C1(C)C)C(=O)C2=O	200	10505800
752	(1R)-endo-fenchyl alcohol	C[C@@]12CC[C@@H](C1)C([C@@H]2O)(C)C	41	5365080
753	(1R)-camphor-10-sulfonic acid	CC1([C@H]2CC[C@@]1(C(=O)C2)CS(=O)(=O)O)C	200	4696797
754	(1R)-camphor-10-sulfonyl chloride	CC1([C@H]2CC[C@@]1(C(=O)C2)CS(=O)(=O)Cl)C	66	7992146
755	(1-bromoethyl)benzene	CC(c1ccccc1)Br	-65	21159570
756	2-(bromomethyl)naphthalene	c1ccc2cc(ccc2c1)CBr	54.5	63503
757	(1,2-dibromoethyl)benzene	c1ccc(cc1)C(CBr)Br	73.5	6878
758	2-(2,6-dimethoxyphenyl)-4,4-dimethyl-2-oxazoline	CC1(COC(=N1)c2c(cccc2OC)OC)C	69	4323324
759	2-(2-aminoethoxy)ethanol	C(COCCO)N	-11	12989
760	2-(2-aminophenyl)benzimidazole	c1ccc(c(c1)c2[nH]c3ccccc3n2)N	214	72160
761	2-(2-carboxyvinyl)benzeneboronic acid	B(c1ccccc1/C=C/C(=O)O)(O)O	171	4826758
762	2-(2-chloro-4-methoxyphenyl)-3-oxobutyronitrile	CC(=O)C(C#N)c1ccc(cc1Cl)OC	79	11213378
763	2-(2-chlorophenoxy)ethylamine	c1ccc(c(c1)OCCN)Cl	40	2017474
764	2-(2-chlorophenyl)benzimidazole	c1ccc(c(c1)c2[nH]c3ccccc3n2)Cl	234	69561
765	2-(2-ethoxyphenoxy)ethyl bromide	CCOc1ccccc1OCCBr	42	5373759
766	2-(2-furyl)-1,3-diphenylimidazolidine	c1ccc(cc1)N2CCN(C2c3ccco3)c4ccccc4	130	593203
767	2-(2-furyl)piperazine	c1cc(oc1)C2CNCCN2	87	14404384
768	2-(2-hydroxyethyl)pyridine	c1ccnc(c1)CCO	-8	7392
769	2-(2-hydroxyphenyl)benzothiazole	c1ccc(c(c1)c2nc3ccccc3s2)O	132	10181821
770	2-(2-methoxyphenyl)-5-phenyl-1,3,4-oxadiazole	COc1ccccc1c2nnc(o2)c3ccccc3	100	67218
771	2-(2-methoxyphenyl)piperazine	COc1ccccc1C2CNCCN2	80	14234235
772	2-(2-methyl-1,3-dioxolan-2-yl)benzeneboronic acid	B(c1ccccc1C2(OCCO2)C)(O)O	111	4320265
773	2-(2-naphthoxy)ethanol	c1ccc2cc(ccc2c1)OCCO	75.35	6864
774	2-(2-naphthyl)piperazine	c1ccc2cc(ccc2c1)C3CNCCN3	102	2052276
775	2-(2-n-butoxyethoxy)ethyl acetate	CCCCOCCOCCOC(=O)C	-32	29028
776	2-(2-pyridyl)benzimidazole	c1ccc2c(c1)[nH]c(n2)c3ccccn3	223	63985
777	2-(2-thienyl)piperazine	c1cc(sc1)C2CNCCN2	83	2052165
778	2-(2-thienyl)pyridine	c1ccnc(c1)c2cccs2	63	69287
779	2-(3,4-dimethoxyphenyl)ethanol	COc1ccc(cc1OC)CCO	46	73918
780	2-(3,4-dimethoxyphenyl)ethylamine	COc1ccc(cc1OC)CCN	11	8114
781	2-(3-chloro-4-fluorophenyl)indole	c1ccc2c(c1)cc([nH]2)c3ccc(c(c3)Cl)F	172	2018239
782	2-(3-chlorophenoxy)propionic acid	CC(C(=O)O)Oc1cccc(c1)Cl	114	7261
783	2-(3-pyridyl)benzimidazole	c1ccc2c(c1)[nH]c(n2)c3cccnc3	257	216780
784	2-(3-thienyl)piperazine	c1cscc1C2CNCCN2	98	14404274
785	2-(4-aminophenyl)-1,1,1,3,3,3-hexafluoro-2-propanol	c1cc(ccc1C(C(F)(F)F)(C(F)(F)F)O)N	150	502282
786	2-(4-aminophenyl)ethanol	c1cc(ccc1CCO)N	109	60266
787	2-(4-aminophenyl)ethylamine	c1cc(ccc1CCN)N	30	65727
788	2-(4-benzyloxyphenyl)ethanol	c1ccc(cc1)COc2ccc(cc2)CCO	86	2285031
789	2-(4-biphenylyl)-2-propanol	CC(C)(c1ccc(cc1)c2ccccc2)O	92	106031
790	2-(4-biphenylyl)-5-(4-tert-butylphenyl)-1,3,4-oxadiazole	CC(C)(C)c1ccc(cc1)c2nnc(o2)c3ccc(cc3)c4ccccc4	137	76483
791	2-(4-biphenylyl)ethylamine	c1ccc(cc1)c2ccc(cc2)CCN	52	26245
792	2-(4-bromophenyl)-5-(1-naphthyl)-1,3,4-oxadiazole	c1ccc2c(c1)cccc2c3nnc(o3)c4ccc(cc4)Br	148	548590
793	2-(4-bromophenyl)-5-phenyl-1,3,4-oxadiazole	c1ccc(cc1)c2nnc(o2)c3ccc(cc3)Br	170	80246
794	2-(4-chloro-2-methylphenoxy)acetic acid hydrazide	Cc1cc(ccc1OCC(=O)NN)Cl	150	131733
795	2-(4-chloro-3-nitrobenzoyl)benzoic acid	c1ccc(c(c1)C(=O)c2ccc(c(c2)[N+](=O)[O-])Cl)C(=O)O	200	59932
796	2-(4-chlorobenzoyl)benzoic acid	c1ccc(c(c1)C(=O)c2ccc(cc2)Cl)C(=O)O	150	59934
797	2-(4-chlorobenzyl)pyridine	c1ccnc(c1)Cc2ccc(cc2)Cl	8	70433
798	2-(4-chlorophenoxy)ethanol	c1cc(ccc1OCCO)Cl	30	15118
799	2-(4-chlorophenoxy)nicotinic acid	c1cc(c(nc1)Oc2ccc(cc2)Cl)C(=O)O	158	529788
800	2-(4-chlorophenyl)indole	c1ccc2c(c1)cc([nH]2)c3ccc(cc3)Cl	206	191197
801	2-(4-chlorophenylthio)-6-fluorobenzonitrile	c1cc(c(c(c1)Sc2ccc(cc2)Cl)C#N)F	70	2018938
802	2-(4-chlorophenylthio)benzaldehyde	c1ccc(c(c1)C=O)Sc2ccc(cc2)Cl	73	2058873
803	2-(4-chlorophenylthio)nicotinic acid	c1cc(c(nc1)Sc2ccc(cc2)Cl)C(=O)O	220	633080
804	2-(4-cyanophenyl)-5-n-pentyl-1,3-dioxane	CCCCCC1COC(OC1)c2ccc(cc2)C#N	57	473021
805	2-(4-cyanophenyl)-5-n-propyl-1,3-dioxane	CCCC1COC(OC1)c2ccc(cc2)C#N	58	151275
806	2-(4-ethoxyphenyl)ethanol	CCOc1ccc(cc1)CCO	42	81010
807	2-(4-ethylphenyl)-5-n-propylpyrimidine	CCCc1cnc(nc1)c2ccc(cc2)CC	42	13672779
808	2-(4-fluorophenoxy)nicotinic acid	c1cc(c(nc1)Oc2ccc(cc2)F)C(=O)O	184	526015
809	2-(4-fluorophenyl)indole	c1ccc2c(c1)cc([nH]2)c3ccc(cc3)F	189	120388
810	2-(4-hydroxyphenyl)propionic acid	CC(c1ccc(cc1)O)C(=O)O	131	92601
811	2-(4-methoxybenzoyl)thiophene	COc1ccc(cc1)C(=O)c2cccs2	73	70208
812	2-(4-methoxyphenyl)ethanol	COc1ccc(cc1)CCO	28	62906
813	2-(4-morpholinyl)-5-(trifluoromethyl)aniline	c1cc(c(cc1C(F)(F)F)N)N2CCOCC2	127	120390
814	2-(4-morpholinyl)aniline	c1ccc(c(c1)N)N2CCOCC2	97	642911
815	2-(4-n-hexyloxyphenyl)-5-n-octylpyrimidine	CCCCCCCCc1cnc(nc1)c2ccc(cc2)OCCCCCC	60	525021
816	2-(4-pyridyl)benzimidazole	c1ccc2c(c1)[nH]c(n2)c3ccncc3	219	216779
817	2-(4-tert-butylphenyl)ethanol	CC(C)(C)c1ccc(cc1)CCO	33	71729
818	2-(5-isoxazolyl)-4-methylphenol	Cc1ccc(c(c1)c2ccno2)O	176	19809861
819	2-(5-isoxazolyl)phenol	c1ccc(c(c1)c2ccno2)O	185	10580356
820	2-(5-nitro-2-pyridyloxy)ethanol	c1cc(ncc1[N+](=O)[O-])OCCO	113	511069
821	2-(8-chloro-1-naphthylthio)acetic acid	c1cc2cccc(c2c(c1)SCC(=O)O)Cl	156	60555
822	2-(allylthio)nicotinic acid	C=CCSc1c(cccn1)C(=O)O	147	1415117
823	2-(boc-amino)-5-cyanopyridine	CC(C)(C)OC(=O)Nc1ccc(cn1)C#N	173	21242568
824	2-(boc-amino)benzeneboronic acid	B(c1ccccc1NC(=O)OC(C)(C)C)(O)O	124	2053649
825	2-(boc-amino)pyridine	CC(C)(C)OC(=O)Nc1ccccn1	93	9381411
826	2-(bromoacetyl)naphthalene	c1ccc2cc(ccc2c1)C(=O)CBr	83	62394
827	2-(bromoacetyl)thiophene	c1cc(sc1)C(=O)CBr	31	2056690
828	2-(bromomethyl)benzonitrile	c1ccc(c(c1)CBr)C#N	72	80868
829	2-(bromomethyl)benzothiazole	c1ccc2c(c1)nc(s2)CBr	48	2056577
830	2-(carboxymethoxy)benzoic acid	c1ccc(c(c1)C(=O)O)OCC(=O)O	190	62668
831	2-(carboxymethylthio)benzoic acid	c1ccc(c(c1)C(=O)O)SCC(=O)O	218	8338
832	2-(diethylamino)ethanol	CCN(CC)CCO	-70	13842001
833	2-(difluoromethoxy)benzoic acid	c1ccc(c(c1)C(=O)O)OC(F)F	99	1554084
834	2-(dimethylamino)ethanol	CN(C)CCO	-63	13854944
835	2-(dimethylamino)ethyl acrylate	CN(C)CCOC(=O)C=C	-60	16195
836	2-(dimethylamino)ethyl methacrylate	CC(=C)C(=O)OCCN(C)C	-30	16879
837	2-(diphenylphosphino)benzoic acid	c1ccc(cc1)P(c2ccccc2)c3ccccc3C(=O)O	178	78496
838	2-(di-tert-butylphosphino)-2'-(n,n-dimethylamino)biphenyl	CC(C)(C)P(c1ccccc1c2ccccc2N(C)C)C(C)(C)C	116	2016678
839	2-(di-tert-butylphosphino)-2'-methylbiphenyl	Cc1ccccc1c2ccccc2P(C(C)(C)C)C(C)(C)C	92	2016679
840	2-(ethoxycarbonyl)benzeneboronic acid	B(c1ccccc1C(=O)OCC)(O)O	132	2053823
841	2-(ethoxycarbonyl)phenyl isocyanate	CCOC(=O)c1ccccc1N=C=O	29	455879
842	2-(ethylamino)ethanol	CCNCCO	-9	7781
843	2-(ethylthio)ethanol	CCSCCO	-100	21159459
844	2-(ethylthio)nicotinic acid	CCSc1c(cccn1)C(=O)O	185	514410
845	2-(ethylthio)nicotinoyl chloride	CCSc1c(cccn1)C(=O)Cl	51	2054930
846	2-(methacryloyloxy)ethyl 3,5-diaminobenzoate	CC(=C)C(=O)OCCOC(=O)c1cc(cc(c1)N)N	91	1724445
847	2-(methacryloyloxy)ethyl 3,5-dinitrobenzoate	CC(=C)C(=O)OCCOC(=O)c1cc(cc(c1)[N+](=O)[O-])[N+](=O)[O-]	71	11258656
848	2-(methoxycarbonyl)benzeneboronic acid	B(c1ccccc1C(=O)OC)(O)O	69	2053912
849	2-(methoxycarbonyl)benzenesulfonamide	COC(=O)c1ccccc1S(=O)(=O)N	124	38804
850	2-(methoxycarbonyl)phenyl isocyanate	COC(=O)c1ccccc1N=C=O	47	453137
851	2'-(methylsulfonyl)acetanilide	CC(=O)Nc1ccccc1S(=O)(=O)C	145	721719
852	2-(methylsulfonyl)benzoic acid	CS(=O)(=O)c1ccccc1C(=O)O	139	250543
853	2-(methylsulfonyl)ethanol	CS(=O)(=O)CCO	29	76528
854	2-(methylsulfonyl)thiophene	CS(=O)(=O)c1cccs1	48	617313
855	2-(methylthio)benzeneboronic acid	B(c1ccccc1SC)(O)O	160	2053959
856	2-(methylthio)benzimidazole	CSc1[nH]c2ccccc2n1	204	22009
857	2-(methylthio)benzoic acid	CSc1ccccc1C(=O)O	167	18374
858	2-(methylthio)benzonitrile	CSc1ccccc1C#N	36	122386
859	2-(methylthio)naphthalene	CSc1ccc2ccccc2c1	63	122614
860	2-(methylthio)nicotinic acid	CSc1c(cccn1)C(=O)O	217	230436
861	2-(methylthio)nicotinoyl chloride	CSc1c(cccn1)C(=O)Cl	94	2054913
862	2-(methylthio)oxazolo[5,4-c]pyridine	CSc1nc2ccncc2o1	80	8416635
863	2-(methylthio)pyrazine	CSc1cnccn1	44	453496
864	2-(n-boc-methylamino)-5-iodo-3-methylpyridine	Cc1cc(cnc1NCC(=O)OC(C)(C)C)I	99	25027438
865	2-(nitromethylene)thiazolidine	C1CSC(=C[N+](=O)[O-])N1	142	3061358
866	2-(n-propylthio)nicotinamide	CCCSc1c(cccn1)C(=O)N	147	2054931
867	2-(n-propylthio)nicotinic acid	CCCSc1c(cccn1)C(=O)O	161	2054922
868	2-(phenylsulfonyl)thiophene	c1ccc(cc1)S(=O)(=O)c2cccs2	123	250525
869	2-(phthalimido)ethanesulfonyl chloride	c1ccc2c(c1)C(=O)N(C2=O)CCS(=O)(=O)Cl	158	272940
870	2-(p-hydroxyphenylazo)benzoic acid	c1ccc(c(c1)C(=O)O)N=Nc2ccc(cc2)O	206	21106123
871	2-(p-toluenesulfonyl)ethanol	Cc1ccc(cc1)S(=O)(=O)CCO	52	80942
872	2-(p-tolyloxy)benzaldehyde	Cc1ccc(cc1)Oc2ccccc2C=O	55	1216697
873	2-(trifluoromethoxy)benzamide	c1ccc(c(c1)C(=O)N)OC(F)(F)F	154	2057489
874	2-(trifluoromethoxy)benzeneboronic acid	B(c1ccccc1OC(F)(F)F)(O)O	119	2057491
875	2-(trifluoromethoxy)benzenesulfonamide	c1ccc(c(c1)OC(F)(F)F)S(=O)(=O)N	189	2057495
876	2-(trifluoromethoxy)benzenesulfonyl chloride	c1ccc(c(c1)OC(F)(F)F)S(=O)(=O)Cl	31	2057502
877	2-(trifluoromethoxy)benzoic acid	c1ccc(c(c1)C(=O)O)OC(F)(F)F	79	2057510
878	2-(trifluoromethoxy)phenylacetic acid	c1ccc(c(c1)CC(=O)O)OC(F)(F)F	55	2057597
879	2'-(trifluoromethyl)acetanilide	CC(=O)Nc1ccccc1C(F)(F)F	96	60974
880	2'-(trifluoromethyl)acetophenone	CC(=O)c1ccccc1C(F)(F)F	16	78562
881	2-(trifluoromethyl)acrylic acid	C=C(C(=O)O)C(F)(F)F	50.75	510851
882	2-(trifluoromethyl)aniline	c1ccc(c(c1)C(F)(F)F)N	-31	6656
883	2-(trifluoromethyl)benzaldehyde	c1ccc(c(c1)C=O)C(F)(F)F	-40	109689
884	2-(trifluoromethyl)benzamide	c1ccc(c(c1)C(=O)N)C(F)(F)F	163	61078
885	2-(trifluoromethyl)benzeneboronic acid	B(c1ccccc1C(F)(F)F)(O)O	109	2016139
886	2-(trifluoromethyl)benzenesulfonamide	c1ccc(c(c1)C(F)(F)F)S(=O)(=O)N	182	2058284
887	2-(trifluoromethyl)benzenesulfonyl chloride	c1ccc(c(c1)C(F)(F)F)S(=O)(=O)Cl	23	120383
888	2-(trifluoromethyl)benzoyl chloride	c1ccc(c(c1)C(=O)Cl)C(F)(F)F	-22	60883
889	2-(trifluoromethyl)benzyl alcohol	c1ccc(c(c1)CO)C(F)(F)F	4	60985
890	2-(trifluoromethyl)benzyl bromide	c1ccc(c(c1)CBr)C(F)(F)F	29	109679
891	2-(trifluoromethyl)cinnamic acid	c1ccc(c(c1)/C=C/C(=O)O)C(F)(F)F	204	628106
892	2-(trifluoromethyl)nicotinic acid	c1cc(c(nc1)C(F)(F)F)C(=O)O	186	2057825
893	2-(trifluoromethyl)phenothiazine	c1ccc2c(c1)Nc3cc(ccc3S2)C(F)(F)F	189	6815
894	2-(trifluoromethyl)phenylacetic acid	c1ccc(c(c1)CC(=O)O)C(F)(F)F	100	516898
895	2-(trifluoromethyl)phenylacetonitrile	c1ccc(c(c1)CC#N)C(F)(F)F	31.5	68907
896	2-(trifluoromethyl)phenylhydrazine	c1ccc(c(c1)C(F)(F)F)NN	60	454270
897	2-(trimethylsilylethynyl)pyridine	C[Si](C)(C)C#Cc1ccccn1	42	456090
898	2,1,3-benzothiadiazole	c1ccc2c(c1)nsn2	43	60826
899	2,2,2-tribromoethanol	C(C(Br)(Br)Br)O	80	6160
900	2,2,2-trichloro-1-ethoxyethanol	CCOC(C(Cl)(Cl)Cl)O	50	21242792
901	2,2,2-trichloroacetamide	C(=O)(C(Cl)(Cl)Cl)N	142	55091
902	2,2,2-trichloroethanol	C(C(Cl)(Cl)Cl)O	18.5	7961
903	2,2,2-trichloroethyl chloroformate	C(C(Cl)(Cl)Cl)OC(=O)Cl	1	78534
904	2,2,2-trifluoroacetophenone	c1ccc(cc1)C(=O)C(F)(F)F	-40	9521
905	2,2,2-trifluoroethanol	C(C(F)(F)F)O	-44	21106169
906	2,2,2-trifluoroethyl p-toluenesulfonate	Cc1ccc(cc1)S(=O)(=O)OCC(F)(F)F	40	61259
907	2,2,2-trifluoroethyl trichloromethanesulfonate	C(C(F)(F)F)OS(=O)(=O)C(Cl)(Cl)Cl	-70	81272
908	2,2,2-trifluoroethyl trifluoroacetate	C(C(F)(F)F)OC(=O)C(F)(F)F	-65	61205
909	2,2,2-trifluoro-n-(2-pyridylmethyl)acetamide	c1ccnc(c1)CNC(=O)C(F)(F)F	75	3370911
910	2,2,2-trimethylacetamide	CC(C)(C)C(=O)N	155	12417
911	2,2,2-trimethylthioacetamide	S=C(N)C(C)(C)C	115	2296271
912	2,2,3,3,3-pentafluoropropionamide	C(=O)(C(C(F)(F)F)(F)F)N	95	61041
913	2,2,3,3,4,4,5,5-octafluoro-1,6-hexanediol	C(C(C(C(C(CO)(F)F)(F)F)(F)F)(F)F)O	69	119957
914	2,2,3,3,4,4-hexafluoro-1,5-pentanediol	C(C(C(C(CO)(F)F)(F)F)(F)F)O	78.75	61148
915	2,2,3,3-tetrafluoro-1,4-butanediol	C(C(C(CO)(F)F)(F)F)O	84	120045
916	2,2,4'-tribromoacetophenone	c1cc(ccc1C(=O)C(Br)Br)Br	93	24014
917	2,2',4'-trichloroacetophenone	c1cc(c(cc1Cl)Cl)C(=O)CCl	54	19076
918	2,2,4-trimethyl-1,3-pentanediol 1-monoisobutyrate	CC(C)C(C(C)(C)COC(=O)C(C)C)O	-50	6245
919	2,2,4-trimethylpentane	CC(C)CC(C)(C)C	-107	10445
920	2,2,5,5-tetramethyl-3-pyrroline-3-carboxamide	CC1(C=C(C(N1)(C)C)C(=O)N)C	181	79616
921	2,2',5,5'-tetramethylbiphenyl	Cc1ccc(c(c1)c2cc(ccc2C)C)C	50	121468
922	2,2,6,6-tetramethylpiperidine	CC1(CCCC(N1)(C)C)C	-59	12493
923	2,2,6-trimethyl-1,3-dioxin-4-one	CC1=CC(=O)OC(O1)(C)C	7	71687
924	2,2':5',2''-terthiophene	c1cc(sc1)c2ccc(s2)c3cccs3	92.75	58578
925	2,2'-bipyridine	c1ccnc(c1)c2ccccn2	70	13867714
926	2,2'-bipyrimidine	c1cnc(nc1)c2ncccn2	114	110040
927	2,2-bis(4-methoxyphenyl)ethylamine	COc1ccc(cc1)C(CN)c2ccc(cc2)OC	48	5379430
928	2,2'-bis(diphenylphosphino)-1,1'-binaphthyl	c1ccc(cc1)P(c2ccccc2)c3ccc4ccccc4c3c5c6ccccc6ccc5P(c7ccccc7)c8ccccc8	283	551072
929	2,2'-bis(diphenylphosphino)biphenyl	c1ccc(cc1)P(c2ccccc2)c3ccccc3c4ccccc4P(c5ccccc5)c6ccccc6	213	2016682
930	2,2-bis(hydroxymethyl)-2,2',2''-nitrilotriethanol	C(CO)N(CCO)C(CO)(CO)CO	104	73505
931	2,2-bis(hydroxymethyl)propionic acid	CC(CO)(CO)C(=O)O	189.5	70865
932	2,2'-bithiophene	c1cc(sc1)c2cccs2	32.5	61428
933	2,2-dibromo-4'-fluoroacetophenone	c1cc(ccc1C(=O)C(Br)Br)F	37	2063398
934	2,2'-dibromobiphenyl	c1ccc(c(c1)c2ccccc2Br)Br	80.5	74932
935	2,2'-dichloro-3,3'-bipyridine	c1cc(c(nc1)Cl)c2cccnc2Cl	119	21242477
936	2,2'-dichloro-4,4'-bipyridine	c1cnc(cc1c2ccnc(c2)Cl)Cl	242	4344547
937	2,2-dichloroacetophenone	c1ccc(cc1)C(=O)C(Cl)Cl	21	21169500
938	2,2'-dichlorobenzil	c1ccc(c(c1)C(=O)C(=O)c2ccccc2Cl)Cl	134	80378
939	2,2'-dichlorobenzilic acid	c1ccc(c(c1)C(c2ccccc2Cl)(C(=O)O)O)Cl	162	291473
940	2,2'-dichlorobenzophenone	c1ccc(c(c1)C(=O)c2ccccc2Cl)Cl	52	307962
941	2,2-difluoro-1,3-benzodioxole-4-carboxylic acid	c1cc(c2c(c1)OC(O2)(F)F)C(=O)O	204	2054476
942	2,2-difluoro-1,3-benzodioxole-5-carboxylic acid	c1cc2c(cc1C(=O)O)OC(O2)(F)F	156	529182
943	2,2-difluoroacetophenone	c1ccc(cc1)C(=O)C(F)F	49	240442
944	2,2-difluorobutyric acid	CCC(C(=O)O)(F)F	8	2942753
945	2,2-difluorocyclopropanecarboxylic acid	C1C(C1(F)F)C(=O)O	58	2062967
946	2,2-difluoroethanol	C(C(F)F)O	-28	119963
947	2,2-difluoropropionic acid	CC(C(=O)O)(F)F	43	2062969
948	2,2-difluorosuccinic acid	C(C(=O)O)C(C(=O)O)(F)F	142	62785
949	2,2'-dihydroxy-4,4'-dimethoxybenzophenone	COc1ccc(c(c1)O)C(=O)c2ccc(cc2O)OC	137.25	8252
950	2,2'-dihydroxybiphenyl	c1ccc(c(c1)c2ccccc2O)O	109	14959
951	2,2-dimethoxypropane	CC(C)(OC)OC	-47	21106033
952	2,2-dimethyl-1,3-propanediol	CC(C)(CO)CO	128	13835293
953	2,2-dimethyl-3-pentanol	CCC(C(C)(C)C)O	-5	18717
954	2,2-dimethylbutane	CCC(C)(C)C	-100	6163
955	2,2-dimethylbutyric acid	CCC(C)(C)C(=O)O	-14	11193
956	2,2-dimethylglutaric anhydride	CC(C)(CCC(=O)O)C(=O)OC(=O)C(C)(C)CCC(=O)O	37	19970814
957	2,2-dimethylsuccinic acid	CC(C)(CC(=O)O)C(=O)O	141	11209
958	2,2-di-n-butyl-1,3-propanediol	CCCCC(CCCC)(CO)CO	40	3295209
959	2,2'-dinitrobiphenyl	c1ccc(c(c1)c2ccccc2[N+](=O)[O-])[N+](=O)[O-]	126	68055
960	2,2-di-n-propylacetamide	CCCC(CCC)C(=O)N	125	64264
961	2,2-diphenylacetamide	c1ccc(cc1)C(c2ccccc2)C(=O)N	166	70789
962	2,2'-dipyridyl disulfide	c1ccnc(c1)SSc2ccccn2	58	58603
963	2,2'-ethylenebis(1,3-dithiane)	C1CSC(SC1)CCC2SCCCS2	134	76427
964	2,2'-furil dioxime	c1coc(c1)/C(=N/O)/C(=NO)/c2occc2	165	16735820
965	2,2'-furoin	c1cc(oc1)C(C(=O)c2ccco2)O	136.75	10629
966	2,2'-methylenebis(4-chlorophenol)	c1cc(c(cc1Cl)Cc2cc(ccc2O)Cl)O	174	2929
967	2,2'-thenil	c1cc(sc1)C(=O)C(=O)c2cccs2	83	241956
968	2,2'-thiobisacetamide	C(C(=O)N)SCC(=O)N	174	24941
969	2,2'-thiodiethanol	C(CSCCO)O	-12	13881956
970	2',3,3'-trichloro-2,4-bipyridine	c1cc(c(nc1)c2ccnc(c2Cl)Cl)Cl	169	21241263
971	2,3,3-trimethyl-3h-benzo[g]indole	CC1=Nc2c3ccccc3ccc2C1(C)C	71	10593444
972	2,3,3-trimethylindolenine	CC1=Nc2ccccc2C1(C)C	7	14685
973	2,3,4,5,6-pentafluoroanisole	COc1c(c(c(c(c1F)F)F)F)F	-38	21171396
974	2,3,4,5,6-pentafluorobenzeneboronic acid	B(c1c(c(c(c(c1F)F)F)F)F)(O)O	253	2056249
975	2,3,4,5,6-pentafluorobenzyl alcohol	C(c1c(c(c(c(c1F)F)F)F)F)O	36.3	9535
976	2,3,4,5,6-pentafluorobenzyl bromide	C(c1c(c(c(c(c1F)F)F)F)F)Br	19	67069
977	2,3,4,5,6-pentafluorobiphenyl	c1ccc(cc1)c2c(c(c(c(c2F)F)F)F)F	112	263316
978	2,3,4,5,6-pentafluorocinnamic acid	C(=C/C(=O)O)c1c(c(c(c(c1F)F)F)F)F	153	1406871
979	2,3,4,5,6-pentafluorophenoxyacetic acid	C(C(=O)O)Oc1c(c(c(c(c1F)F)F)F)F	109	76390
980	2,3,4,5,6-pentafluorophenylacetic acid	C(c1c(c(c(c(c1F)F)F)F)F)C(=O)O	109	62757
981	2,3,4,5,6-pentafluorotoluene	Cc1c(c(c(c(c1F)F)F)F)F	-30	21168888
982	2',3',4',5',6'-pentamethylacetophenone	Cc1c(c(c(c(c1C)C)C(=O)C)C)C	86	67439
983	2,3,4,5,6-pentamethylbenzophenone	Cc1c(c(c(c(c1C)C)C(=O)c2ccccc2)C)C	138	453381
984	2,3,4,5,6-pentamethylbenzyl alcohol	Cc1c(c(c(c(c1C)C)CO)C)C	159	1042581
985	2,3,4,5-tetrafluorobenzamide	c1c(c(c(c(c1F)F)F)F)C(=O)N	133	2056894
986	2,3,4,5-tetrafluorobenzeneboronic acid	B(c1cc(c(c(c1F)F)F)F)(O)O	253	2063416
987	2,3,4,5-tetrahydro-1h-1,4-benzodiazepine	c1ccc2c(c1)CNCCN2	98	2052200
988	2,3,4,5-tetramethylpyrrole	Cc1c(c([nH]c1C)C)C	105	63661
989	2,3,4,6-tetrafluorobenzeneboronic acid	B(c1c(cc(c(c1F)F)F)F)(O)O	127	2063417
990	2,3,4,6-tetra-o-benzyl-alpha-D-glucopyranose	c1ccc(cc1)COC[C@@H]2[C@H]([C@@H]([C@H]([C@H](O2)O)OCc3ccccc3)OCc4ccccc4)OCc5ccccc5	151	9905972
991	2,3,4,6-tetra-o-benzyl-D-glucopyranose	c1ccc(cc1)COC[C@@H]2[C@H]([C@@H]([C@H](C(O2)O)OCc3ccccc3)OCc4ccccc4)OCc5ccccc5	153	9115737
992	2,3,4-tribromothiophene	c1c(c(c(s1)Br)Br)Br	44	69058
993	2,3',4'-trichloroacetophenone	c1cc(c(cc1C(=O)CCl)Cl)Cl	44	279787
994	2',3',4'-trichloroacetophenone	CC(=O)c1ccc(c(c1Cl)Cl)Cl	62	24343
995	2,3,4-trichlorobenzenesulfonyl chloride	c1cc(c(c(c1S(=O)(=O)Cl)Cl)Cl)Cl	63	33863
996	2,3,4-trichlorophenyl isothiocyanate	c1cc(c(c(c1N=C=S)Cl)Cl)Cl	70	128424
997	2,3,4-trifluorobenzamide	c1cc(c(c(c1C(=O)N)F)F)F	128	516857
998	2,3,4-trifluorobenzeneboronic acid	B(c1ccc(c(c1F)F)F)(O)O	203	2063423
999	2,3,4-trifluorophenol	c1cc(c(c(c1O)F)F)F	32	109789
1000	2',3',4'-trihydroxyacetophenone	CC(=O)c1ccc(c(c1O)O)O	172	10256
1001	2,3,4-trihydroxybenzaldehyde	c1cc(c(c(c1C=O)O)O)O	162.67	67616
1002	2,3,4-trihydroxybenzophenone	c1ccc(cc1)C(=O)c2ccc(c(c2O)O)O	141	64001
1003	2,3,4-trimethoxybenzaldehyde	COc1ccc(c(c1OC)OC)C=O	40	67561
1004	2,3,4-trimethoxybenzeneboronic acid	B(c1ccc(c(c1OC)OC)OC)(O)O	77	2053997
1005	2,3,4-trimethoxybenzonitrile	COc1ccc(c(c1OC)OC)C#N	56	527068
1006	2,3,4-tri-o-benzyl-beta-D-arabinopyranose	c1ccc(cc1)CO[C@@H]2CO[C@H]([C@H]([C@@H]2OCc3ccccc3)OCc4ccccc4)O	69	5894904
1007	2,3,4-tri-o-benzyl-beta-l-arabinopyranose	c1ccc(cc1)CO[C@H]2CO[C@@H]([C@@H]([C@H]2OCc3ccccc3)OCc4ccccc4)O	78	25027430
1008	2,3,5,6-tetrafluorobenzeneboronic acid	B(c1c(c(cc(c1F)F)F)F)(O)O	143	2063418
1009	2,3,5,6-tetrafluorobenzonitrile	c1c(c(c(c(c1F)F)C#N)F)F	34	262708
1010	2,3,5,6-tetrafluorobenzyl alcohol	c1c(c(c(c(c1F)F)CO)F)F	36	2015787
1011	2,3,5,6-tetrafluorohydroquinone	c1(c(c(c(c(c1F)F)O)F)F)O	169	63065
1012	2,3,5,6-tetrafluorophenylhydrazine	c1c(c(c(c(c1F)F)NN)F)F	90.5	62756
1013	2,3,5,6-tetrafluoropyridine-4-propionic acid	C(CC(=O)O)c1c(c(nc(c1F)F)F)F	152	21242199
1014	2',3',5',6'-tetramethylacetophenone	Cc1cc(c(c(c1C)C(=O)C)C)C	75	221431
1015	2,3,5,6-tetramethylbenzenesulfonyl chloride	Cc1cc(c(c(c1C)S(=O)(=O)Cl)C)C	99	126817
1016	2,3,5,6-tetramethylbenzyl alcohol	Cc1cc(c(c(c1C)CO)C)C	112	5378365
1017	2,3,5,6-tetramethylbenzyl chloride	Cc1cc(c(c(c1C)CCl)C)C	70	73945
1018	2,3,5,6-tetramethylpyrazine	Cc1c(nc(c(n1)C)C)C	85	13658
1019	2,3,5-tribromothiophene	c1c(c(sc1Br)Br)Br	28	69057
1020	2,3,5-trichlorobenzeneboronic acid	B(c1cc(cc(c1Cl)Cl)Cl)(O)O	245	4281837
1021	2,3,5-trichlorothiophene	c1c(c(sc1Cl)Cl)Cl	-16	109974
1022	2,3,5-trifluoropyridine-4-carboxylic acid	c1c(c(c(c(n1)F)F)C(=O)O)F	110	2062980
1023	2,3,5-triiodobenzoic acid	c1c(cc(c(c1C(=O)O)I)I)I	221	6682
1024	2,3,6-trifluorobenzamide	c1cc(c(c(c1F)C(=O)N)F)F	117	516855
1025	2,3,6-trifluorobenzyl alcohol	c1cc(c(c(c1F)CO)F)F	46	128345
1026	2,3,6-trifluorophenol	c1cc(c(c(c1F)O)F)F	34	451937
1027	2,3,6-trifluoropyridine-4-carboxylic acid	c1c(c(c(nc1F)F)F)C(=O)O	120	2062981
1028	2,3,6-trimethylquinoxaline	Cc1ccc2c(c1)nc(c(n2)C)C	93	78665
1029	2,3-bis(trifluoromethyl)pyridine	c1cc(c(nc1)C(F)(F)F)C(F)(F)F	-2	512765
1030	2,3-butanedione	CC(=O)C(=O)C	-3	630
1031	2,3-butanedione monoxime	CC(=NO)C(=O)C	76	4911363
1032	2,3-diaminonaphthalene	c1ccc2cc(c(cc2c1)N)N	194.67	63067
1033	2,3-diaminopyridine	c1cc(c(nc1)N)N	112	9562
1034	2,3-diaminotoluene	Cc1cccc(c1N)N	60.75	16633
1035	2,3-dibromo-1,4-butanediol	C(C(C(CO)Br)Br)O	85	15233
1036	2,3-dibromo-4-hydroxy-5-methoxybenzaldehyde	COc1cc(c(c(c1O)Br)Br)C=O	215	453983
1037	2,3-dibromo-6-chloropyridine	c1cc(nc(c1Br)Br)Cl	70	21242350
1038	2,3'-dibromoacetophenone	c1cc(cc(c1)Br)C(=O)CBr	51	453214
1039	2,3-dibromobutyric acid	CC(C(C(=O)O)Br)Br	86	86082
1040	2,3-dibromopropionamide	C(C(C(=O)N)Br)Br	133	77387
1041	2,3-dibromopyridine	c1cc(c(nc1)Br)Br	59	713810
1042	2,3-dichloro-1-propene	C=C(CCl)Cl	-83	6317
1043	2,3-dichloro-6-fluorobenzoic acid	c1cc(c(c(c1F)C(=O)O)Cl)Cl	135	3089427
1044	2,3-dichlorobenzaldehyde	c1cc(c(c(c1)Cl)Cl)C=O	63	32881
1045	2,3-dichlorobenzamide	c1cc(c(c(c1)Cl)Cl)C(=O)N	167	2017637
1046	2,3-dichlorobenzeneboronic acid	B(c1cccc(c1Cl)Cl)(O)O	238	2016405
1047	2,3-dichlorobenzenesulfonamide	c1cc(c(c(c1)Cl)Cl)S(=O)(=O)N	220	6617846
1048	2,3-dichlorobenzenesulfonyl chloride	c1cc(c(c(c1)Cl)Cl)S(=O)(=O)Cl	60	2015978
1049	2,3-dichlorobenzoic acid	c1cc(c(c(c1)Cl)Cl)C(=O)O	168.5	5562
1050	2,3-dichlorobenzonitrile	c1cc(c(c(c1)Cl)Cl)C#N	63	643679
1051	2,3-dichlorobenzoyl chloride	c1cc(c(c(c1)Cl)Cl)C(=O)Cl	30	16948
1052	2,3-dichlorophenol	c1cc(c(c(c1)Cl)Cl)O	57.67	10857
1053	2,3-dichlorophenoxyacetic acid	c1cc(c(c(c1)Cl)Cl)OCC(=O)O	174	17101
1054	2,3-dichlorophenylacetic acid	c1cc(c(c(c1)Cl)Cl)CC(=O)O	134	2016346
1055	2,3-dichloropyridine-4-boronic acid	B(c1ccnc(c1Cl)Cl)(O)O	137	2720021
1056	2,3-dichlorothiophene-5-sulfonyl chloride	c1c(c(sc1S(=O)(=O)Cl)Cl)Cl	56	452467
1057	2',3'-dideoxycytidine	c1cn(c(=O)nc1N)[C@H]2CC[C@H](O2)CO	215	22498
1058	2,3-difluoro-4-hydroxybenzaldehyde	c1cc(c(c(c1C=O)F)F)O	142	16130202
1059	2,3-difluoro-4-hydroxybenzoic acid	c1cc(c(c(c1C(=O)O)F)F)O	207	2059542
1060	2,3-difluoro-4-hydroxybenzonitrile	c1cc(c(c(c1C#N)F)F)O	147	2018629
1061	2,3-difluoro-4-methoxyaniline	COc1ccc(c(c1F)F)N	39	3025905
1062	2,3-difluoro-4-methoxybenzoic acid	COc1ccc(c(c1F)F)C(=O)O	223	2847041
1063	2,3-difluoro-4-methoxybenzonitrile	COc1ccc(c(c1F)F)C#N	84	14493634
1064	2,3-difluoro-4-methoxybenzylamine	COc1ccc(c(c1F)F)CN	34	3044197
1065	2,3-difluoro-4-methoxyphenol	COc1ccc(c(c1F)F)O	105	2054528
1066	2,3-difluoro-4-methylbenzamide	Cc1ccc(c(c1F)F)C(=O)N	160	2054547
1067	2,3-difluoro-4-methylbenzoic acid	Cc1ccc(c(c1F)F)C(=O)O	200	2054549
1068	2,3-difluoro-4-methylbenzonitrile	Cc1ccc(c(c1F)F)C#N	44	10684099
1069	2,3-difluoro-4-methylphenol	Cc1ccc(c(c1F)F)O	37	2054559
1070	2,3-difluoro-5-hydroxybenzoic acid	c1c(cc(c(c1C(=O)O)F)F)O	182	21885657
1071	2,3-difluoro-6-methoxybenzaldehyde	COc1ccc(c(c1C=O)F)F	59	2054520
1072	2,3-difluoro-6-methoxybenzoic acid	COc1ccc(c(c1C(=O)O)F)F	128	3086274
1073	2,3-difluoro-6-methoxybenzonitrile	COc1ccc(c(c1C#N)F)F	81	3067474
1074	2,3-difluoro-6-methoxybenzyl bromide	COc1ccc(c(c1CBr)F)F	47	4175830
1075	2,3-difluoro-6-methoxyphenol	COc1ccc(c(c1O)F)F	46	2519239
1076	2,3-difluoro-6-nitrophenol	c1cc(c(c(c1[N+](=O)[O-])O)F)F	61	2015517
1077	2,3-difluorobenzamide	c1cc(c(c(c1)F)F)C(=O)N	116	123798
1078	2,3-difluorobenzoic acid	c1cc(c(c(c1)F)F)C(=O)O	163	328957
1079	2,3-difluorocinnamic acid	c1cc(c(c(c1)F)F)/C=C/C(=O)O	200	4643113
1080	2,3-difluoromandelic acid	c1cc(c(c(c1)F)F)C(C(=O)O)O	112	511698
1081	2,3-difluorophenol	c1cc(c(c(c1)F)F)O	36	73005
1082	2,3-difluorophenylacetic acid	c1cc(c(c(c1)F)F)CC(=O)O	118	454248
1083	2,3-dihydro-1h-benz[de]isoquinoline	c1cc2cccc3c2c(c1)CNC3	99	180689
1084	2,3-dihydro-5h-1,4-benzodioxepin-5-one	c1ccc2c(c1)C(=O)OCCO2	30	183207
1085	2,3-dihydro-6-methyl-3-oxo-4h-1,4-benzoxazine-4-propionitrile	Cc1ccc2c(c1)N(C(=O)CO2)CCC#N	130	3719708
1086	2,3-dihydro-6-phenylimidazo[2,1-b]thiazole-5-carboxaldehyde	c1ccc(cc1)c2c(n3c(n2)SCC3)C=O	123	292295
1087	2,3-dihydrobenzo[b]furan	c1ccc2c(c1)CCO2	-21	21106522
1088	2,3-dihydroxybenzaldehyde	c1cc(c(c(c1)O)O)C=O	108	81781
1089	2',3-dihydroxyflavone	c1ccc2c(c1)c(=O)c(c(o2)c3ccccc3O)O	203	400932
1090	2,3-dihydroxynaphthalene	c1ccc2cc(c(cc2c1)O)O	163	6824
1091	2,3-dimethoxybenzaldehyde	COc1cccc(c1OC)C=O	52	59950
1092	2,3-dimethoxybenzaldoxime	COc1cccc(c1OC)C=NO	99	85978
1093	2,3-dimethoxybenzeneboronic acid	B(c1cccc(c1OC)OC)(O)O	69	4329515
1094	2,3-dimethoxybenzoic acid	COc1cccc(c1OC)C(=O)O	123	14470
1095	2,3-dimethoxy-beta-nitrostyrene	COc1cccc(c1OC)/C=C/[N+](=O)[O-]	81	4528658
1096	2,3-dimethyl-1,3-butadiene	CC(=C)C(=C)C	-76	10124
1097	2,3-dimethyl-4-nitropyridine n-oxide	Cc1c([n+](ccc1[N+](=O)[O-])[O-])C	93	130666
1098	2,3-dimethyl-5-nitroindole	Cc1c([nH]c2c1cc(cc2)[N+](=O)[O-])C	189	80180
1099	2,3-dimethyl-6-nitroaniline	Cc1ccc(c(c1C)N)[N+](=O)[O-]	117	519116
1100	2,3-dimethylanisole	Cc1cccc(c1C)OC	29	21159742
1101	2,3-dimethylbenzamide	Cc1cccc(c1C)C(=O)N	157	2079700
1102	2,3-dimethylbenzeneboronic acid	B(c1cccc(c1C)C)(O)O	175	2053813
1103	2,3-dimethylbenzoic acid	Cc1cccc(c1C)C(=O)O	145.5	11289
1104	2,3-dimethylbenzonitrile	Cc1cccc(c1C)C#N	24	72095
1105	2,3-dimethylbenzoyl chloride	Cc1cccc(c1C)C(=O)Cl	2	2079621
1106	2,3-dimethylphenoxyacetic acid	Cc1cccc(c1C)OCC(=O)O	186	68719
1107	2,3-dimethylpyrazine	Cc1c(nccn1)C	-12	20843
1108	2,3-dimethylquinoxaline	Cc1c(nc2ccccc2n1)C	105	16036
1109	2,3-diphenylpyrazine	c1ccc(cc1)c2c(nccn2)c3ccccc3	121	213276
1110	2,3-hexanedione	CCCC(=O)C(=O)C	-30	18563
1111	2',3'-isopropylideneuridine	CC1([C@]2([C@@]1([C@@H](O[C@@H]2CO)n3ccc(=O)[nH]c3=O)O)O)C	166	19969382
1112	2,3-lutidine	Cc1cccnc1C	-17	10940
1113	2,3-o-isopropylidene-D-threitol	CC1(O[C@@H]([C@H](O1)CO)CO)C	47	686679
1114	2,3-o-isopropylidene-l-threitol	CC1(O[C@H]([C@@H](O1)CO)CO)C	47	686677
1115	2',4,4'-trihydroxychalcone	c1cc(ccc1/C=C/C(=O)c2ccc(cc2O)O)O	186	553829
1116	2,4,4'-trimethoxybenzophenone	COc1ccc(cc1)C(=O)c2ccc(cc2OC)OC	72	222782
1117	2,4,4-trimethyl-2-pentene	CC(=CC(C)(C)C)C	-106	7581
1118	2,4,5-tribromotoluene	Cc1cc(c(cc1Br)Br)Br	114	121524
1119	2,4,5-trichlorobenzenesulfonamide	c1c(c(cc(c1Cl)Cl)Cl)S(=O)(=O)N	189	1042584
1120	2,4,5-trichlorophenyl isothiocyanate	c1c(c(cc(c1Cl)Cl)Cl)N=C=S	45	110005
1121	2,4,5-trifluoroaniline	c1c(c(cc(c1F)F)F)N	61	85675
1122	2,4,5-trifluorobenzeneboronic acid	B(c1cc(c(cc1F)F)F)(O)O	100	2063276
1123	2,4,5-trifluorobenzoic acid	c1c(c(cc(c1F)F)F)C(=O)O	99	454604
1124	2,4,5-trifluorocinnamic acid	c1c(c(cc(c1F)F)F)/C=C/C(=O)O	186	4647464
1125	2,4,5-trifluorophenol	c1c(c(cc(c1F)F)F)O	41	109768
1126	2,4,5-trifluorophenylacetic acid	c1c(c(cc(c1F)F)F)CC(=O)O	123	2058216
1127	2,4,5-trimethoxybenzoic acid	COc1cc(c(cc1OC)OC)C(=O)O	144.5	9856
1128	2',4',5'-trimethylacetophenone	Cc1cc(c(cc1C)C(=O)C)C	10	21159574
1129	2,4,5-trimethylphenol	Cc1cc(c(cc1C)O)C	72	9911
1130	2,4,6-triaminopyrimidine	c1c(nc(nc1N)N)N	250	13263
1131	2,4,6-tribromo-3-methylphenol	Cc1c(cc(c(c1Br)O)Br)Br	83	19526
1132	2,4,6-tribromophenol	c1c(cc(c(c1Br)O)Br)Br	89	1438
1133	2,4,6-tribromoresorcinol	c1c(c(c(c(c1Br)O)Br)O)Br	115	16179
1134	2,4,6-tribromotoluene	Cc1c(cc(cc1Br)Br)Br	69.5	31264
1135	2,4,6-trichloroaniline	c1c(cc(c(c1Cl)N)Cl)Cl	76.5	11961
1136	2,4,6-trichlorobenzenesulfonamide	c1c(cc(c(c1Cl)S(=O)(=O)N)Cl)Cl	180	1064939
1137	2,4,6-trichlorobenzenesulfonyl chloride	c1c(cc(c(c1Cl)S(=O)(=O)Cl)Cl)Cl	46	454754
1138	2,4,6-trichlorobenzonitrile	c1c(cc(c(c1Cl)C#N)Cl)Cl	81	455502
1139	2,4,6-trichlorophenol	c1c(cc(c(c1Cl)O)Cl)Cl	67.4	21106172
1140	2,4,6-trichlorophenyl isothiocyanate	c1c(cc(c(c1Cl)N=C=S)Cl)Cl	74	109996
1141	2,4,6-trichlorophenylhydrazine	c1c(cc(c(c1Cl)NN)Cl)Cl	142	71559
1142	2,4,6-trifluorobenzaldehyde	c1c(cc(c(c1F)C=O)F)F	66	455208
1143	2,4,6-trifluorobenzeneboronic acid	B(c1c(cc(cc1F)F)F)(O)O	235	2059563
1144	2,4,6-trifluorobenzoic acid	c1c(cc(c(c1F)C(=O)O)F)F	142	453910
1145	2,4,6-trifluorobenzonitrile	c1c(cc(c(c1F)C#N)F)F	57	644241
1146	2,4,6-trifluorophenol	c1c(cc(c(c1F)O)F)F	50	453554
1147	2,4,6-trifluorophenylacetic acid	c1c(cc(c(c1F)CC(=O)O)F)F	111	2058217
1148	2,4,6-trifluorophenylhydrazine	c1c(cc(c(c1F)NN)F)F	99	14421860
1149	2,4,6-triiodophenol	c1c(cc(c(c1I)O)I)I	158.6	11369
1150	2',4',6'-triisopropylacetophenone	CC(C)c1cc(c(c(c1)C(C)C)C(=O)C)C(C)C	87	67769
1151	2,4,6-triisopropylbenzenesulfonamide	CC(C)c1cc(c(c(c1)C(C)C)S(=O)(=O)N)C(C)C	115	643374
1152	2,4,6-triisopropylbenzenesulfonyl azide	CC(C)c1cc(c(c(c1)C(C)C)S(=O)(=O)N=[N+]=[N-])C(C)C	42	329877
1153	2,4,6-triisopropylbenzenesulfonyl chloride	CC(C)c1cc(c(c(c1)C(C)C)S(=O)(=O)Cl)C(C)C	96	73115
1154	2,4,6-triisopropylbenzoic acid	CC(C)c1cc(c(c(c1)C(C)C)C(=O)O)C(C)C	186	86855
1155	2,4,6-triisopropylbenzoyl chloride	CC(C)c1cc(c(c(c1)C(C)C)C(=O)Cl)C(C)C	80	83680
1156	2',4',6'-trimethoxyacetophenone	CC(=O)c1c(cc(cc1OC)OC)OC	103	109709
1157	2,4,6-trimethoxybenzonitrile	COc1cc(c(c(c1)OC)C#N)OC	142	68248
1158	2,4,6-trimethoxytoluene	Cc1c(cc(cc1OC)OC)OC	28	75960
1159	2,4,6-trimethylaniline	Cc1cc(c(c(c1)C)N)C	-5	21111773
1160	2,4,6-trimethylbenzeneboronic acid	B(c1c(cc(cc1C)C)C)(O)O	124	257815
1161	2,4,6-trimethylbenzoic acid	Cc1cc(c(c(c1)C)C(=O)O)C	153.3	9779
1162	2,4,6-trimethylbenzonitrile	Cc1cc(c(c(c1)C)C#N)C	53	121308
1163	2,4,6-trimethylbenzyl alcohol	Cc1cc(c(c(c1)C)CO)C	87	18973
1164	2,4,6-trimethylbenzyl chloride	Cc1cc(c(c(c1)C)CCl)C	40	66722
1165	2,4,6-trimethylbenzyl mercaptan	Cc1cc(c(c(c1)C)CS)C	47	266870
1166	2,4,6-trimethylphenol	Cc1cc(c(c(c1)C)O)C	72.5	10248
1167	2,4,6-trimethylphenyl isocyanate	Cc1cc(c(c(c1)C)N=C=O)C	45	517437
1168	2,4,6-trimethylphenyl isothiocyanate	Cc1cc(c(c(c1)C)N=C=S)C	62	122274
1169	2,4,6-triphenyl-1,3,5-triazine	c1ccc(cc1)c2nc(nc(n2)c3ccccc3)c4ccccc4	235	9883
1170	2,4,6-triphenylaniline	c1ccc(cc1)c2cc(c(c(c2)c3ccccc3)N)c4ccccc4	124	546619
1171	2,4,6-tris(allyloxy)-1,3,5-triazine	C=CCOc1nc(nc(n1)OCC=C)OCC=C	26..67	7274
1172	2,4,6-tri-tert-butylaniline	CC(C)(C)c1cc(c(c(c1)C(C)(C)C)N)C(C)(C)C	146	63581
1173	2,4-bis(chloromethyl)mesitylene	Cc1cc(c(c(c1CCl)C)CCl)C	106	120802
1174	2,4-bis(trifluoromethyl)benzoic acid	c1cc(c(cc1C(F)(F)F)C(F)(F)F)C(=O)O	109	125053
1175	2,4-di(tert-pentyl)phenoxyacetic acid	CCC(C)(C)c1ccc(c(c1)C(C)(C)CC)OCC(=O)O	126	75265
1176	2,4-diamino-5-fluoroquinazoline	c1cc2c(c(c1)F)c(nc(n2)N)N	247	401739
1177	2,4-diamino-6-(4-methylphenyl)-1,3,5-triazine	Cc1ccc(cc1)c2nc(nc(n2)N)N	242	27464
1178	2,4-diamino-6-[3-(trifluoromethyl)phenyl]-1,3,5-triazine	c1cc(cc(c1)C(F)(F)F)c2nc(nc(n2)N)N	209	2062365
1179	2,4-diamino-6-undecyl-1,3,5-triazine	CCCCCCCCCCCc1nc(nc(n1)N)N	120	68192
1180	2,4-diaminoquinazoline	c1ccc2c(c1)c(nc(n2)N)N	256	58597
1181	2,4-diaminotoluene	Cc1ccc(cc1N)N	98.3	6991
1182	2,4-dianilino-6-(4-morpholinyl)-1,3,5-triazine	c1ccc(cc1)Nc2nc(nc(n2)N3CCOCC3)Nc4ccccc4	195	682572
1183	2,4-dibenzyloxypyrimidine-5-boronic acid	B(c1cnc(nc1OCc2ccccc2)OCc3ccccc3)(O)O	90	2017201
1184	2,4-dibromo-6-(trifluoromethyl)aniline	c1c(cc(c(c1C(F)(F)F)N)Br)Br	42	644276
1185	2,4-dibromo-6-fluoroaniline	c1c(cc(c(c1F)N)Br)Br	63	2018421
1186	2,4-dibromo-6-fluorophenol	c1c(cc(c(c1F)O)Br)Br	32	2054389
1187	2,4-dibromo-6-nitroaniline	c1c(cc(c(c1[N+](=O)[O-])N)Br)Br	130	63201
1188	2,4'-dibromoacetophenone	c1cc(ccc1C(=O)CBr)Br	110	7174
1189	2,4-dibromoanisole	COc1ccc(cc1Br)Br	62	25152
1190	2,4-dibromobenzenesulfonyl chloride	c1cc(c(cc1Br)Br)S(=O)(=O)Cl	84	2019008
1191	2,4-dibromophenoxyacetic acid	c1cc(c(cc1Br)Br)OCC(=O)O	151	74347
1192	2,4-dibromophenyl isocyanate	c1cc(c(cc1Br)Br)N=C=O	83	3838711
1193	2,4-dibromopyridine	c1cnc(cc1Br)Br	39	713812
1194	2,4-dichloro-1-nitrobenzene	c1cc(c(cc1Cl)Cl)[N+](=O)[O-]	31	21106035
1195	2,4-dichloro-3,5-dimethylphenol	Cc1cc(c(c(c1Cl)C)Cl)O	89.5	8302
1196	2,4-dichloro-3,5-dinitrobenzotrifluoride	c1c(c(c(c(c1[N+](=O)[O-])Cl)[N+](=O)[O-])Cl)C(F)(F)F	76	85190
1197	2,4-dichloro-3-ethyl-6-nitrophenol	CCc1c(cc(c(c1Cl)O)[N+](=O)[O-])Cl	50	5383295
1198	2,4-dichloro-3-nitrophenol	c1cc(c(c(c1O)Cl)[N+](=O)[O-])Cl	87	15118866
1199	2',4'-dichloro-5'-fluoroacetophenone	CC(=O)c1cc(c(cc1Cl)Cl)F	35	635087
1200	2,4-dichloro-5-fluorobenzamide	c1c(c(cc(c1F)Cl)Cl)C(=O)N	159	2054420
1201	2,4-dichloro-5-fluorobenzoic acid	c1c(c(cc(c1F)Cl)Cl)C(=O)O	141	599623
1202	2,4-dichloro-5-fluorobenzonitrile	c1c(c(cc(c1F)Cl)Cl)C#N	46	2062898
1203	2,4-dichloro-5-isopropoxyaniline	CC(C)Oc1cc(c(cc1Cl)Cl)N	42	149047
1204	2,4-dichloro-5-methylbenzenesulfonyl chloride	Cc1cc(c(cc1Cl)Cl)S(=O)(=O)Cl	72	107065
1205	2,4-dichloro-5-nitrobenzotrifluoride	c1c(c(cc(c1[N+](=O)[O-])Cl)Cl)C(F)(F)F	55	539768
1206	2,4-dichloro-5-nitrophenol	c1c(c(cc(c1O)Cl)Cl)[N+](=O)[O-]	100	157991
1207	2,4-dichloro-5-nitropyrimidine	c1c(c(nc(n1)Cl)Cl)[N+](=O)[O-]	30	454693
1208	2,4-dichloro-6,7-dimethoxyquinazoline	COc1cc2c(cc1OC)nc(nc2Cl)Cl	177	453869
1209	2,4-dichloro-6-iodoaniline	c1c(cc(c(c1Cl)N)I)Cl	80	5894296
1210	2,4-dichloro-6-methylaniline	Cc1cc(cc(c1N)Cl)Cl	44	1064943
1211	2,4-dichloro-6-methylbenzonitrile	Cc1cc(cc(c1C#N)Cl)Cl	80	2079679
1212	2,4-dichloro-6-methylbenzylamine	Cc1cc(cc(c1CN)Cl)Cl	54	2079685
1213	2,4-dichloro-6-nitroaniline	c1c(cc(c(c1[N+](=O)[O-])N)Cl)Cl	101	68398
1214	2',4'-dichloroacetanilide	CC(=O)Nc1ccc(cc1Cl)Cl	147	73502
1215	2,4'-dichloroacetophenone	c1cc(ccc1C(=O)CCl)Cl	101	21170959
1216	2,4-dichloroaniline	c1cc(c(cc1Cl)Cl)N	61	13860817
1217	2,4-dichloroanisole	COc1ccc(cc1Cl)Cl	27.25	10648
1218	2,4-dichlorobenzamide	c1cc(c(cc1Cl)Cl)C(=O)N	192	68081
1219	2,4-dichlorobenzeneboronic acid	B(c1ccc(cc1Cl)Cl)(O)O	244	2016403
1220	2,4-dichlorobenzenesulfonyl chloride	c1cc(c(cc1Cl)Cl)S(=O)(=O)Cl	54	177064
1221	2,4-dichlorobenzhydrazide	c1cc(c(cc1Cl)Cl)C(=O)NN	169	122214
1222	2,4-dichlorobenzoic acid	c1cc(c(cc1Cl)Cl)C(=O)O	162	5583
1223	2,4-dichlorobenzonitrile	c1cc(c(cc1Cl)Cl)C#N	59	73123
1224	2,4-dichlorobenzoyl chloride	c1cc(c(cc1Cl)Cl)C(=O)Cl	17.25	60012
1225	2,4-dichlorobenzyl chloride	c1cc(c(cc1Cl)Cl)CCl	-3	6942
1226	2',4'-dichloro-n-methylacetanilide	CC(=O)N(C)c1ccc(cc1Cl)Cl	87	2016949
1227	2,4-dichlorophenol	c1cc(c(cc1Cl)Cl)O	43.3	8140
1228	2,4-dichlorophenoxyacetic acid	c1cc(c(cc1Cl)Cl)OCC(=O)O	138	1441
1229	2,4-dichlorophenoxyacetic acid hydrazide	c1cc(c(cc1Cl)Cl)OCC(=O)NN	151	276194
1230	2,4-dichlorophenoxyacetonitrile	c1cc(c(cc1Cl)Cl)OCC#N	47	215056
1231	2,4-dichlorophenyl isocyanate	c1cc(c(cc1Cl)Cl)N=C=O	59	68298
1232	2,4-dichlorophenyl isothiocyanate	c1cc(c(cc1Cl)Cl)N=C=S	38	73139
1233	2,4-dichlorophenylacetic acid	c1cc(c(cc1Cl)Cl)CC(=O)O	129	79576
1234	2,4-dichlorophenylacetonitrile	c1cc(c(cc1Cl)Cl)CC#N	60	72758
1235	2,4-dichloropyridine	c1cnc(cc1Cl)Cl	-1	30920
1236	2,4-dichloropyrimidine	c1cnc(nc1Cl)Cl	60	69938
1237	2,4-dichlorotoluene	Cc1ccc(cc1Cl)Cl	-13	21111905
1238	2,4-difluoro-3-methoxybenzamide	COc1c(ccc(c1F)C(=O)N)F	112	4196566
1239	2,4-difluoro-3-methoxybenzoic acid	COc1c(ccc(c1F)C(=O)O)F	194	3008767
1240	2,4-difluoro-3-methoxybenzonitrile	COc1c(ccc(c1F)C#N)F	45	3087686
1241	2,4-difluoro-3-methylbenzonitrile	Cc1c(ccc(c1F)C#N)F	44	9519057
1242	2,4-difluoro-3-methylbenzoyl chloride	Cc1c(ccc(c1F)C(=O)Cl)F	37	14669321
1243	2',4'-difluoroacetanilide	CC(=O)Nc1ccc(cc1F)F	122	86739
1244	2,4-difluorobenzaldehyde	c1cc(c(cc1F)F)C=O	3	66410
1245	2,4-difluorobenzamide	c1cc(c(cc1F)F)C(=O)N	161	110182
1246	2,4-difluorobenzeneboronic acid	B(c1ccc(cc1F)F)(O)O	249	2016086
1247	2,4-difluorobenzoic acid	c1cc(c(cc1F)F)C(=O)O	188.5	66716
1248	2,4-difluorobenzonitrile	c1cc(c(cc1F)F)C#N	46	69952
1249	2,4'-difluorobenzophenone	c1ccc(c(c1)C(=O)c2ccc(cc2)F)F	23	60970
1250	2,4-difluoromandelic acid	c1cc(c(cc1F)F)C(C(=O)O)O	123	511699
1251	2',4'-difluoro-n-methylacetanilide	CC(=O)N(C)c1ccc(cc1F)F	84	2019260
1252	2,4-difluorophenol	c1cc(c(cc1F)F)O	23	109673
1253	2,4-difluorophenylacetic acid	c1cc(c(cc1F)F)CC(=O)O	118	110175
1254	2',4'-dihydroxy-2-methoxychalcone	COc1ccccc1/C=C/C(=O)c2ccc(cc2O)O	177	4828020
1255	2',4-dihydroxy-3-methoxychalcone	COc1cc(ccc1O)/C=C/C(=O)c2ccccc2O	128	4767768
1256	2',4'-dihydroxy-3'-methylacetophenone	Cc1c(ccc(c1O)C(=O)C)O	154	514753
1257	2',4'-dihydroxyacetophenone	CC(=O)c1ccc(cc1O)O	145	6724
1258	2,4-dihydroxybenzhydrazide	c1cc(c(cc1O)O)C(=O)NN	241	145917
1259	2,4-dihydroxybenzophenone	c1ccc(cc1)C(=O)c2ccc(cc2O)O	145	8254
1260	2,4-dimethoxy-1-iodobenzene	COc1ccc(c(c1)OC)I	39	124093
1261	2,4-dimethoxy-1-nitrobenzene	COc1ccc(c(c1)OC)[N+](=O)[O-]	75.25	70990
1262	2',4'-dimethoxyacetophenone	CC(=O)c1ccc(cc1OC)OC	40.5	63208
1263	2,4-dimethoxybenzaldehyde	COc1ccc(c(c1)OC)C=O	71	62390
1264	2,4-dimethoxybenzaldoxime	COc1ccc(c(c1)OC)C=NO	107	201467
1265	2,4-dimethoxybenzeneboronic acid	B(c1ccc(cc1OC)OC)(O)O	118	2016093
1266	2,4-dimethoxybenzenesulfonamide	COc1ccc(c(c1)OC)S(=O)(=O)N	168	4972023
1267	2,4-dimethoxybenzenesulfonyl chloride	COc1ccc(c(c1)OC)S(=O)(=O)Cl	72	2016371
1268	2,4-dimethoxybenzoic acid	COc1ccc(c(c1)OC)C(=O)O	109	6785
1269	2,4-dimethoxybenzonitrile	COc1ccc(c(c1)OC)C#N	94	70149
1270	2,4-dimethoxybenzoyl chloride	COc1ccc(c(c1)OC)C(=O)Cl	59	2016463
1271	2,4-dimethoxybenzyl alcohol	COc1ccc(c(c1)OC)CO	37	73766
1272	2,4-dimethoxy-beta-nitrostyrene	COc1ccc(c(c1)OC)/C=C/[N+](=O)[O-]	100	599704
1273	2,4-dimethoxyphenyl isocyanate	COc1ccc(c(c1)OC)N=C=O	32	523017
1274	2,4-dimethoxyphenyl isothiocyanate	COc1ccc(c(c1)OC)N=C=S	52	2017878
1275	2,4-dimethoxyphenylacetic acid	COc1ccc(c(c1)OC)CC(=O)O	110	311242
1276	2,4-dimethoxypyrimidine	COc1ccnc(n1)OC	17	121621
1277	2,4-dimethyl-6-nitroaniline	Cc1cc(c(c(c1)[N+](=O)[O-])N)C	67	66826
1278	2,4-dimethyl-6-nitrophenol	Cc1cc(c(c(c1)[N+](=O)[O-])O)C	70	76179
1279	2,4-dimethylbenzaldehyde	Cc1ccc(c(c1)C)C=O	-9	21105885
1280	2,4-dimethylbenzeneboronic acid	B(c1ccc(cc1C)C)(O)O	206	3409017
1281	2,4-dimethylimidazole	Cc1c[nH]c(n1)C	89	63444
1282	2,4-dimethylpentane	CC(C)CC(C)C	-120.6	7619
1283	2,4-dimethylphenoxyacetic acid	Cc1ccc(c(c1)C)OCC(=O)O	141	75213
1284	2,4-dimethylphenyl isothiocyanate	Cc1ccc(c(c1)C)N=C=S	27	125606
1285	2,4-dimethylstyrene	Cc1ccc(c(c1)C)C=C	-64	15829
1286	2,4-dinitro-1-(trifluoromethoxy)benzene	c1cc(c(cc1[N+](=O)[O-])[N+](=O)[O-])OC(F)(F)F	-21	2018776
1287	2,4-dinitroanisole	COc1ccc(cc1[N+](=O)[O-])[N+](=O)[O-]	91.67	8080
1288	2,4-dinitrobenzaldehyde	c1cc(c(cc1[N+](=O)[O-])[N+](=O)[O-])C=O	68.3	61548
1289	2,4-dinitrobenzenesulfonyl chloride	c1cc(c(cc1[N+](=O)[O-])[N+](=O)[O-])S(=O)(=O)Cl	102	66861
1290	2,4-dinitrobenzoic acid	c1cc(c(cc1[N+](=O)[O-])[N+](=O)[O-])C(=O)O	181.5	11387
1291	2,4-dinitrobenzyl bromide	c1cc(c(cc1[N+](=O)[O-])[N+](=O)[O-])CBr	51	5383961
1292	2,4-dinitrophenol	c1cc(c(cc1[N+](=O)[O-])[N+](=O)[O-])O	107	1448
1293	2,4-dinitrophenyl thiocyanate	c1cc(c(cc1[N+](=O)[O-])[N+](=O)[O-])SC#N	139	14588
1294	2,4-dinitrophenylacetic acid	c1cc(c(cc1[N+](=O)[O-])[N+](=O)[O-])CC(=O)O	180	192195
1295	2,4-dinitrotoluene	Cc1ccc(cc1[N+](=O)[O-])[N+](=O)[O-]	70	8150
1296	2,4-di-tert-butylphenol	CC(C)(C)c1ccc(c(c1)C(C)(C)C)O	55.3	7037
1297	2,4-hexadiyn-1,6-diol	C(C#CC#CCO)O	112	85694
1298	2,4-lutidine	Cc1ccnc(c1)C	-62	21132380
1299	2,4-pentanedione dioxime	CC(=NO)CC(=NO)C	149	85498
1300	2,4-thiazolidinedione	C1C(=O)NC(=O)S1	126.5	5242
1301	2,5,6-trimethylbenzothiazole	Cc1cc2c(cc1C)sc(n2)C	84	72063
1302	2,5-bis(1-naphthyl)-1,3,4-oxadiazole	c1ccc2c(c1)cccc2c3nnc(o3)c4cccc5c4cccc5	177	63368
1303	2,5-bis(4-biphenylyl)-1,3,4-oxadiazole	c1ccc(cc1)c2ccc(cc2)c3nnc(o3)c4ccc(cc4)c5ccccc5	237	87437
1304	2,5-bis(4-biphenylyl)oxazole	c1ccc(cc1)c2ccc(cc2)c3cnc(o3)c4ccc(cc4)c5ccccc5	239	85930
1305	2,5-bis(4-nitrophenyl)-1,3,4-oxadiazole	c1cc(ccc1c2nnc(o2)c3ccc(cc3)[N+](=O)[O-])[N+](=O)[O-]	311	13365
1306	2,5-bis(5-tert-butyl-2-benzoxazolyl)thiophene	CC(C)(C)c1ccc2c(c1)nc(o2)c3ccc(s3)c4nc5cc(ccc5o4)C(C)(C)C	200	258050
1307	2,5-bis(chloromethyl)-p-xylene	Cc1cc(c(cc1CCl)C)CCl	132	72729
1308	2,5-bis(trifluoromethyl)benzenesulfonamide	c1cc(c(cc1C(F)(F)F)S(=O)(=O)N)C(F)(F)F	147	21328647
1309	2,5-bis(trifluoromethyl)benzenesulfonyl chloride	c1cc(c(cc1C(F)(F)F)S(=O)(=O)Cl)C(F)(F)F	61	2058515
1310	2,5-bis(trifluoromethyl)benzoic acid	c1cc(c(cc1C(F)(F)F)C(=O)O)C(F)(F)F	79	643319
1311	2,5-bis(trimethylsilyl)thiazole	C[Si](C)(C)c1cnc(s1)[Si](C)(C)C	55	21242532
1312	2,5-diacetoxytoluene	Cc1cc(ccc1OC(=O)C)OC(=O)C	41	3395363
1313	2,5-diaminobenzenesulfonic acid	c1cc(c(cc1N)S(=O)(=O)O)N	299	59984
1314	2,5-dibromo-3,4-dinitrothiophene	c1(c(c(sc1Br)Br)[N+](=O)[O-])[N+](=O)[O-]	136	225449
1315	2,5-dibromo-3,6-difluorobenzenesulfonyl chloride	c1c(c(c(c(c1Br)F)S(=O)(=O)Cl)Br)F	69	499338
1316	2,5-dibromo-3-methylpyridine	Cc1cc(cnc1Br)Br	45	714347
1317	2,5-dibromo-4-methylpyridine	Cc1cc(ncc1Br)Br	38	2016181
1318	2,5-dibromoaniline	c1cc(c(cc1Br)N)Br	52.5	69628
1319	2,5-dibromobenzaldehyde	c1cc(c(cc1Br)C=O)Br	95	10437298
1320	2,5-dibromobenzenesulfonyl chloride	c1cc(c(cc1Br)S(=O)(=O)Cl)Br	71	2019147
1321	2,5-dibromobenzoic acid	c1cc(c(cc1Br)C(=O)O)Br	156	11398
1322	2,5-dibromobenzotrifluoride	c1cc(c(cc1Br)C(F)(F)F)Br	49	74103
1323	2,5-dibromopyridine	c1cc(ncc1Br)Br	94	62562
1324	2,5-dibromothiazole	c1c(sc(n1)Br)Br	47	276255
1325	2,5-dibromothiophene	c1cc(sc1Br)Br	-6	17429
1326	2,5-dichloro-1,4-benzoquinone	C1=C(C(=O)C=C(C1=O)Cl)Cl	160.75	11516
1327	2,5-dichloro-3,4-dinitrothiophene	c1(c(c(sc1Cl)Cl)[N+](=O)[O-])[N+](=O)[O-]	87	311492
1328	2,5-dichloro-3-iodopyridine	c1c(cnc(c1I)Cl)Cl	52	21242467
1329	2,5-dichloro-3-nitrobenzoic acid	c1c(cc(c(c1C(=O)O)Cl)[N+](=O)[O-])Cl	220	6685
1330	2,5-dichloro-4-nitroaniline	c1c(c(cc(c1Cl)[N+](=O)[O-])Cl)N	155	21626
1331	2',5'-dichloroacetoacetanilide	CC(=O)CC(=O)Nc1cc(ccc1Cl)Cl	95	67453
1332	2,5-dichloroaniline	c1cc(c(cc1Cl)N)Cl	50	13869655
1333	2,5-dichlorobenzaldehyde	c1cc(c(cc1Cl)C=O)Cl	56	21111840
1334	2,5-dichlorobenzamide	c1cc(c(cc1Cl)C(=O)N)Cl	160	20923
1335	2,5-dichlorobenzeneboronic acid	B(c1cc(ccc1Cl)Cl)(O)O	213	2053789
1336	2,5-dichlorobenzenesulfonyl chloride	c1cc(c(cc1Cl)S(=O)(=O)Cl)Cl	38	71720
1337	2,5-dichlorobenzhydrazide	c1cc(c(cc1Cl)C(=O)NN)Cl	180	127250
1338	2,5-dichlorobenzonitrile	c1cc(c(cc1Cl)C#N)Cl	130	80307
1339	2,5-dichlorobenzyl alcohol	c1cc(c(cc1Cl)CO)Cl	78	105999
1340	2,5-dichlorobenzyl bromide	c1cc(c(cc1Cl)CBr)Cl	41	2736032
1341	2,5-dichlorohydroquinone	c1c(c(cc(c1Cl)O)Cl)O	170	64
1342	2,5-dichlorophenol	c1cc(c(cc1Cl)O)Cl	57	65
1343	2,5-dichlorophenyl isocyanate	c1cc(c(cc1Cl)N=C=O)Cl	30	71679
1344	2,5-dichlorophenylhydrazine	c1cc(c(cc1Cl)NN)Cl	103.25	8998
1345	2,5-dichloro-p-xylene	Cc1cc(c(cc1Cl)C)Cl	69	13868642
1346	2,5-dichloropyridine-3-boronic acid	B(c1cc(cnc1Cl)Cl)(O)O	154	11179869
1347	2,5-dichlorothiophene-3-carboxylic acid	c1c(c(sc1Cl)Cl)C(=O)O	148	195975
1348	2,5-dichlorotoluene	Cc1cc(ccc1Cl)Cl	5	27492
1349	2,5-diethoxyaniline	CCOc1ccc(c(c1)N)OCC	85	60122
1350	2',5'-diethoxybenzanilide	CCOc1ccc(c(c1)NC(=O)c2ccccc2)OCC	88	60066
1351	2,5-difluoro-4-hydroxybenzaldehyde	c1c(c(cc(c1F)O)F)C=O	147	10724054
1352	2,5-difluoro-4-methoxybenzaldehyde	COc1cc(c(cc1F)C=O)F	99	3081972
1353	2,5-difluoro-4-methoxybenzonitrile	COc1cc(c(cc1F)C#N)F	91	3059039
1354	2,5-difluoroaniline	c1cc(c(cc1F)N)F	14	61094
1355	2,5-difluorobenzamide	c1cc(c(cc1F)C(=O)N)F	112	456068
1356	2,5-difluorobenzenesulfonamide	c1cc(c(cc1F)S(=O)(=O)N)F	141	130327
1357	2,5-difluorobenzoic acid	c1cc(c(cc1F)C(=O)O)F	131.5	68816
1358	2,5-difluorobenzonitrile	c1cc(c(cc1F)C#N)F	33	110152
1359	2,5-difluorocinnamic acid	c1cc(c(cc1F)/C=C/C(=O)O)F	139	2015101
1360	2,5-difluoromandelic acid	c1cc(c(cc1F)C(C(=O)O)O)F	111	511697
1361	2,5-difluorophenol	c1cc(c(cc1F)O)F	38	85674
1362	2,5-difluorophenylacetic acid	c1cc(c(cc1F)CC(=O)O)F	125	456060
1363	2,5-difluorophenylhydrazine	c1cc(c(cc1F)NN)F	75	511968
1364	2,5-difluorotoluene	Cc1cc(ccc1F)F	-35	61295
1365	2,5-dihydro-3-methylthiophene 1,1-dioxide	CC1=CCS(=O)(=O)C1	63	64103
1366	2',5'-dihydroxyacetophenone	CC(=O)c1cc(ccc1O)O	206	9859
1367	2',5'-dihydroxypropiophenone	CCC(=O)c1cc(ccc1O)O	97.25	63495
1368	2,5-diiodopyridine	c1cc(ncc1I)I	155	3453478
1369	2',5'-dimethoxyacetophenone	CC(=O)c1cc(ccc1OC)OC	19.5	64152
1370	2,5-dimethoxyaniline	COc1ccc(c(c1)N)OC	80	13869661
1371	2,5-dimethoxybenzaldehyde	COc1ccc(c(c1)C=O)OC	51	60092
1372	2,5-dimethoxybenzeneboronic acid	B(c1cc(ccc1OC)OC)(O)O	93	2016094
1373	2,5-dimethoxybenzenesulfonamide	COc1ccc(c(c1)S(=O)(=O)N)OC	147	181123
1374	2,5-dimethoxybenzenesulfonyl chloride	COc1ccc(c(c1)S(=O)(=O)Cl)OC	114	120739
1375	2,5-dimethoxybenzoic acid	COc1ccc(c(c1)C(=O)O)OC	77	68524
1376	2,5-dimethoxybenzonitrile	COc1ccc(c(c1)C#N)OC	82	71525
1377	2,5-dimethoxyphenyl isocyanate	COc1ccc(c(c1)N=C=O)OC	40	3389558
1378	2,5-dimethoxyphenyl isothiocyanate	COc1ccc(c(c1)N=C=S)OC	36	125682
1379	2,5-dimethoxyphenylacetic acid	COc1ccc(c(c1)CC(=O)O)OC	124	67055
1380	2,5-dimethyl-1,3,4-thiadiazole	Cc1nnc(s1)C	64	87514
1381	2,5-dimethyl-2,4-hexadiene	CC(=CC=C(C)C)C	12.5	12451
1382	2,5-dimethyl-2,4-hexadienedioic acid	CC(=CC=C(C)C(=O)O)C(=O)O	221	124096
1383	2,5-dimethyl-2,5-hexanediol	CC(C)(CCC(C)(C)O)O	90.5	7740
1384	2,5-dimethyl-3-furoyl chloride	Cc1cc(c(o1)C)C(=O)Cl	20	2016548
1385	2,5-dimethyl-4-phenylthiazole	Cc1c(nc(s1)C)c2ccccc2	28	4207021
1386	2,5-dimethylaniline	Cc1ccc(c(c1)N)C	15	13869434
1387	2,5-dimethylbenzeneboronic acid	B(c1cc(ccc1C)C)(O)O	180	2016099
1388	2,5-dimethylbenzoic acid	Cc1ccc(c(c1)C(=O)O)C	133.3	11399
1389	2,5-dimethylbenzothiazole	Cc1ccc2c(c1)nc(s2)C	39	6957
1390	2,5-dimethylbenzyl alcohol	Cc1ccc(c(c1)CO)C	41	85332
1391	2,5-dimethylcinnamic acid	Cc1ccc(c(c1)/C=C/C(=O)O)C	130	5382589
1392	2,5-dimethylfuran	Cc1ccc(o1)C	-62.4	11763
1393	2,5-dimethylphenol	Cc1ccc(c(c1)O)C	75.1	13839128
1394	2,5-dimethylphenoxyacetic acid	Cc1ccc(c(c1)OCC(=O)O)C	115	73830
1395	2,5-dimethylphenylacetic acid	Cc1ccc(c(c1)CC(=O)O)C	128	75441
1396	2,5-dimethylphenylacetonitrile	Cc1ccc(c(c1)CC#N)C	28	25822
1397	2,5-dimethylpyrazine	Cc1cnc(cn1)C	15	28992
1398	2,5-dimethylpyrazolo[1,5-a]pyrimidin-7(4h)-one	Cc1cc(=O)n2c([nH]1)cc(n2)C	253	10825277
1399	2,5-dimethylstyrene	Cc1ccc(c(c1)C=C)C	-35	15433
1400	2,5-diphenyl-4-hydroxy-3-oxo-2,3-dihydrothiophene 1,1-dioxide	c1ccc(cc1)C2C(=O)C(=C(S2(=O)=O)c3ccccc3)O	240	344378
1401	2,5-diphenylfuran	c1ccc(cc1)c2ccc(o2)c3ccccc3	89.5	63567
1402	2,5-diphenyloxazole	c1ccc(cc1)c2cnc(o2)c3ccccc3	73	6838
1403	2,5-diphenyl-p-benzoquinone	c1ccc(cc1)C2=CC(=O)C(=CC2=O)c3ccccc3	217	63244
1404	2,5-di-tert-butyl-p-benzoquinone	CC(C)(C)C1=CC(=O)C(=CC1=O)C(C)(C)C	153	16245
1405	2,5-hexanedione	CC(=O)CCC(=O)C	-6.13	7744
1406	2,6,6-trimethyl-2-cyclohexene-1,4-dione	CC1=CC(=O)CC(C1=O)(C)C	20	56162
1407	2,6-bis(2,2,2-trifluoroethoxy)benzonitrile	c1cc(c(c(c1)OCC(F)(F)F)C#N)OCC(F)(F)F	116	2017758
1408	2,6-bis(hydroxymethyl)-p-cresol	Cc1cc(c(c(c1)CO)O)CO	126	6772
1409	2,6-bis(p-tolyl)pyridine	Cc1ccc(cc1)c2cccc(n2)c3ccc(cc3)C	165	76166
1410	2,6-bis(trifluoromethyl)benzeneboronic acid	B(c1c(cccc1C(F)(F)F)C(F)(F)F)(O)O	150	2063382
1411	2,6-bis(trifluoromethyl)benzoic acid	c1cc(c(c(c1)C(F)(F)F)C(=O)O)C(F)(F)F	138	81818
1412	2,6-bis(trifluoromethyl)pyridine	c1cc(nc(c1)C(F)(F)F)C(F)(F)F	57	512764
1413	2,6-diacetylpyridine	CC(=O)c1cccc(n1)C(=O)C	80	63955
1414	2,6-diamino-3,5-difluoropyridine	c1c(c(nc(c1F)N)N)F	160	8351704
1415	2,6-diamino-3-fluoro-4-(trifluoromethyl)pyridine	c1c(c(c(nc1N)N)F)C(F)(F)F	71	5894966
1416	2,6-diaminopurine	c1[nH]c2c(n1)c(nc(n2)N)N	302	28738
1417	2,6-diaminotoluene	Cc1c(cccc1N)N	103.5	12650
1418	2,6-dibenzylidenecyclohexanone	c1ccc(cc1)C=C2CCCC(=Cc3ccccc3)C2=O	117	86033
1419	2,6-dibenzyloxybenzonitrile	c1ccc(cc1)COc2cccc(c2C#N)OCc3ccccc3	123	2289680
1420	2',6-dibromo-3,4'-bipyridine	c1cc(ncc1c2ccnc(c2)Br)Br	191	21242367
1421	2,6-dibromo-4-(trifluoromethyl)aniline	c1c(cc(c(c1Br)N)Br)C(F)(F)F	38	127533
1422	2,6-dibromo-4-fluoroaniline	c1c(cc(c(c1Br)N)Br)F	65	212316
1423	2,6-dibromo-4-fluorophenol	c1c(cc(c(c1Br)O)Br)F	55	60973
1424	2,6-dibromo-4-fluorophenyl isocyanate	c1c(cc(c(c1Br)N=C=O)Br)F	44	3509886
1425	2,6-dibromo-4-isopropylaniline	CC(C)c1cc(c(c(c1)Br)N)Br	46	122765
1426	2,6-dibromo-4-methylaniline	Cc1cc(c(c(c1)Br)N)Br	74	73471
1427	2,6-dibromo-4-methylphenol	Cc1cc(c(c(c1)Br)O)Br	50	16163
1428	2,6-dibromo-4-nitroaniline	c1c(cc(c(c1Br)N)Br)[N+](=O)[O-]	207	12676
1429	2,6-dibromo-4-nitrotoluene	Cc1c(cc(cc1Br)[N+](=O)[O-])Br	56	5378809
1430	2,6-dibromo-4-n-propylaniline	CCCc1cc(c(c(c1)Br)N)Br	56	2054801
1431	2,6-dibromoaniline	c1cc(c(c(c1)Br)N)Br	83	21169503
1432	2,6-dibromonaphthalene	c1cc(cc2c1cc(cc2)Br)Br	165	555940
1433	2,6-dibromophenol	c1cc(c(c(c1)Br)O)Br	55.75	11354
1434	2,6-dibromopyridine	c1cc(nc(c1)Br)Br	119	11771
1435	2,6-dibromotoluene	Cc1c(cccc1Br)Br	4	31916
1436	2,6-dichloro-1,4-benzoquinone	C1=C(C(=O)C(=CC1=O)Cl)Cl	123	12246
1437	2,6-dichloro-3-cyano-4-methylpyridine	Cc1cc(nc(c1C#N)Cl)Cl	111.5	63319
1438	2,6-dichloro-3-cyano-5-fluoropyridine	c1c(c(nc(c1F)Cl)Cl)C#N	91	2015614
1439	2,6-dichloro-3-nitrobenzonitrile	c1cc(c(c(c1[N+](=O)[O-])Cl)C#N)Cl	108	3660595
1440	2,6-dichloro-3-nitropyridine	c1cc(nc(c1[N+](=O)[O-])Cl)Cl	64	76872
1441	2,6-dichloro-3-nitrotoluene	Cc1c(ccc(c1Cl)[N+](=O)[O-])Cl	54	87699
1442	2,6-dichloro-4-(trifluoromethoxy)aniline	c1c(cc(c(c1Cl)N)Cl)OC(F)(F)F	32	599726
1443	2,6-dichloro-4-(trifluoromethoxy)benzoic acid	c1c(cc(c(c1Cl)C(=O)O)Cl)OC(F)(F)F	152	16499416
1444	2,6-dichloro-4-(trifluoromethyl)aniline	c1c(cc(c(c1Cl)N)Cl)C(F)(F)F	36	124456
1445	2,6-dichloro-4-(trifluoromethyl)benzenesulfonyl chloride	c1c(cc(c(c1Cl)S(=O)(=O)Cl)Cl)C(F)(F)F	48	2018523
1446	2,6-dichloro-4-(trifluoromethyl)phenylhydrazine	c1c(cc(c(c1Cl)NN)Cl)C(F)(F)F	59	599703
1447	2,6-dichloro-4-fluoroaniline	c1c(cc(c(c1Cl)N)Cl)F	56	2054417
1448	2,6-dichloro-4-fluorophenol	c1c(cc(c(c1Cl)O)Cl)F	49	85672
1449	2,6-dichloro-4-hydroxybenzaldehyde	c1c(cc(c(c1Cl)C=O)Cl)O	228	460493
1450	2,6-dichloro-4-iodopyridine	c1c(cc(nc1Cl)Cl)I	163	9912100
1451	2,6-dichloro-4-nitropyridine	c1c(cc(nc1Cl)Cl)[N+](=O)[O-]	96	3066636
1452	2,6-dichloro-4-nitropyridine n-oxide	c1c(cc([n+](c1Cl)[O-])Cl)[N+](=O)[O-]	178	2064658
1453	2,6-dichloro-5-fluoronicotinic acid	c1c(c(nc(c1F)Cl)Cl)C(=O)O	154	2015436
1454	2',6'-dichloroacetanilide	CC(=O)Nc1c(cccc1Cl)Cl	181	26692
1455	2',6'-dichloroacetophenone	CC(=O)c1c(cccc1Cl)Cl	43	67440
1456	2,6-dichloroaniline	c1cc(c(c(c1)Cl)N)Cl	39.33	11353
1457	2,6-dichloroanisole	COc1c(cccc1Cl)Cl	10	15311
1458	2,6-dichlorobenzaldehyde	c1cc(c(c(c1)Cl)C=O)Cl	71	6481
1459	2,6-dichlorobenzaldoxime	c1cc(c(c(c1)Cl)C=NO)Cl	149	82466
1460	2,6-dichlorobenzamide	c1cc(c(c(c1)Cl)C(=O)N)Cl	198.17	15359
1461	2,6-dichlorobenzeneboronic acid	B(c1c(cccc1Cl)Cl)(O)O	152	2016084
1462	2,6-dichlorobenzenesulfonyl chloride	c1cc(c(c(c1)Cl)S(=O)(=O)Cl)Cl	53	455505
1463	2,6-dichlorobenzoic acid	c1cc(c(c(c1)Cl)C(=O)O)Cl	143.75	5555
1464	2,6-dichlorobenzothiazole	c1cc2c(cc1Cl)sc(n2)Cl	96	69609
1465	2,6-dichlorobenzoyl chloride	c1cc(c(c(c1)Cl)C(=O)Cl)Cl	17	70761
1466	2,6-dichlorobenzyl alcohol	c1cc(c(c(c1)Cl)CO)Cl	97.5	25276
1467	2,6-dichlorobenzyl bromide	c1cc(c(c(c1)Cl)CBr)Cl	56	28010
1468	2,6-dichlorobenzyl chloride	c1cc(c(c(c1)Cl)CCl)Cl	38	67397
1469	2,6-dichloro-beta-nitrostyrene	c1cc(c(c(c1)Cl)/C=C/[N+](=O)[O-])Cl	65	4520331
1470	2,6-dichloronicotinic acid	c1cc(nc(c1C(=O)O)Cl)Cl	149	746430
1471	2,6-dichlorophenol	c1cc(c(c(c1)Cl)O)Cl	67	6633
1472	2,6-dichlorophenyl isocyanate	c1cc(c(c(c1)Cl)N=C=O)Cl	44	525527
1473	2,6-dichlorophenyl isothiocyanate	c1cc(c(c(c1)Cl)N=C=S)Cl	43	109852
1474	2,6-dichlorophenylacetamide	c1cc(c(c(c1)Cl)CC(=O)N)Cl	217	2665961
1475	2,6-dichlorophenylacetonitrile	c1cc(c(c(c1)Cl)CC#N)Cl	76	69139
1476	2,6-dichloropyridine	c1cc(nc(c1)Cl)Cl	87	16095
1477	2,6-dichloropyridine n-oxide	c1cc([n+](c(c1)Cl)[O-])Cl	138	714340
1478	2,6-difluoro-3-hydroxybenzaldehyde	c1cc(c(c(c1O)F)C=O)F	112	516459
1479	2,6-difluoro-3-methoxybenzonitrile	COc1ccc(c(c1F)C#N)F	72	3019491
1480	2,6-difluoro-3-methoxybenzyl bromide	COc1ccc(c(c1F)CBr)F	55	3025049
1481	2,6-difluoro-3-methoxyphenol	COc1ccc(c(c1F)O)F	75	2915352
1482	2,6-difluoro-3-methylbenzoic acid	Cc1ccc(c(c1F)C(=O)O)F	140	2054550
1483	2,6-difluoro-3-nitrobenzonitrile	c1cc(c(c(c1[N+](=O)[O-])F)C#N)F	53	2018681
1484	2,6-difluoro-4-hydroxybenzaldehyde	c1c(cc(c(c1F)C=O)F)O	181	21393505
1485	2,6-difluoro-4-iodophenol	c1c(cc(c(c1F)O)F)I	72	24603051
1486	2,6-difluoro-4-methoxyaniline	COc1cc(c(c(c1)F)N)F	39	4357711
1487	2,6-difluoro-4-methoxybenzaldehyde	COc1cc(c(c(c1)F)C=O)F	75	2935333
1488	2,6-difluoro-4-methoxybenzoic acid	COc1cc(c(c(c1)F)C(=O)O)F	184	2058487
1489	2,6-difluoro-4-methoxybenzonitrile	COc1cc(c(c(c1)F)C#N)F	55	2059015
1490	2,6-difluoro-4-methoxybenzyl bromide	COc1cc(c(c(c1)F)CBr)F	45	2600509
1491	2,6-difluoro-4-methoxyphenol	COc1cc(c(c(c1)F)O)F	69	2512047
1492	2,6-difluorobenzaldehyde	c1cc(c(c(c1)F)C=O)F	16	120058
1493	2,6-difluorobenzenesulfonamide	c1cc(c(c(c1)F)S(=O)(=O)N)F	190	393676
1494	2,6-difluorobenzoic acid	c1cc(c(c(c1)F)C(=O)O)F	158.5	9413
1495	2,6-difluorobenzonitrile	c1cc(c(c(c1)F)C#N)F	30.5	67268
1496	2,6-difluorobenzyl bromide	c1cc(c(c(c1)F)CBr)F	51	505402
1497	2,6-difluorobenzyl chloride	c1cc(c(c(c1)F)CCl)F	34	505514
1498	2,6-difluorocinnamic acid	c1cc(c(c(c1)F)/C=C/C(=O)O)F	125	4522575
1499	2,6-difluoromandelic acid	c1cc(c(c(c1)F)C(C(=O)O)O)F	144	511660
1500	2,6-difluorophenol	c1cc(c(c(c1)F)O)F	38.75	85185
1501	2,6-difluorophenyl isocyanate	c1cc(c(c(c1)F)N=C=O)F	24	455488
1502	2,6-difluorophenylacetic acid	c1cc(c(c(c1)F)CC(=O)O)F	101	110179
1503	2,6-dihydroxy-4-methylpyridine	Cc1cc(nc(c1)O)O	197	70764
1504	2',6'-dihydroxyacetophenone	CC(=O)c1c(cccc1O)O	158	62888
1505	2,6-dihydroxynaphthalene	c1cc(cc2c1cc(cc2)O)O	222	84452
1506	2,6-diiodo-4-nitrophenol	c1c(cc(c(c1I)O)I)[N+](=O)[O-]	155.67	9002
1507	2,6-diisopropylnaphthalene	CC(C)c1ccc2cc(ccc2c1)C(C)C	69	29899
1508	2,6-diisopropylphenol	CC(C)c1cccc(c1O)C(C)C	18	4774
1509	2,6-dimethoxy-3-nitrobenzoic acid	COc1ccc(c(c1C(=O)O)OC)[N+](=O)[O-]	131	2342060
1510	2,6-dimethoxy-4-methylbenzaldehyde	Cc1cc(c(c(c1)OC)C=O)OC	93	202207
1511	2,6-dimethoxy-4-methylphenol	Cc1cc(c(c(c1)OC)O)OC	39	210530
1512	2,6-dimethoxyaniline	COc1cccc(c1N)OC	77	86612
1513	2,6-dimethoxybenzaldehyde	COc1cccc(c1C=O)OC	97	87027
1514	2,6-dimethoxybenzeneboronic acid	B(c1c(cccc1OC)OC)(O)O	107	2016095
1515	2,6-dimethoxybenzoyl chloride	COc1cccc(c1C(=O)Cl)OC	65	67377
1516	2,6-dimethoxybenzylamine	COc1cccc(c1CN)OC	85	2079594
1517	2,6-dimethoxynaphthalene	COc1ccc2cc(ccc2c1)OC	151.5	71934
1518	2,6-dimethoxy-p-benzoquinone	COC1=CC(=O)C=C(C1=O)OC	254.67	61560
1519	2,6-dimethoxyphenoxyacetic acid	COc1cccc(c1OCC(=O)O)OC	81	281700
1520	2,6-dimethoxypyridine-3-boronic acid	B(c1ccc(nc1OC)OC)(O)O	129	2043407
1521	2,6-dimethyl-2-heptanol	CC(C)CCCC(C)(C)O	-10	75130
1522	2,6-dimethyl-4-iodophenol	Cc1cc(cc(c1O)C)I	97	482900
1523	2,6-dimethyl-4-nitroanisole	Cc1cc(cc(c1OC)C)[N+](=O)[O-]	87	123324
1524	2,6-dimethyl-4-pyrone	Cc1cc(=O)cc(o1)C	133	13262
1525	2',6'-dimethylacetanilide	Cc1cccc(c1NC(=O)C)C	182	15753
1526	2,6-dimethylbenzonitrile	Cc1cccc(c1C#N)C	90	73130
1527	2,6-dimethyl-p-benzoquinone	CC1=CC(=O)C=C(C1=O)C	70.8	61542
1528	2,6-dimethylphenol	Cc1cccc(c1O)C	47.5	13839174
1529	2,6-dimethylphenyl isocyanide	Cc1cccc(c1[N+]#[C-])C	74	68508
1530	2,6-dimethylpyrazine	Cc1cncc(n1)C	44.25	7650
1531	2,6-dimethylquinoline	Cc1ccc2c(c1)ccc(n2)C	58.5	12840
1532	2,6-dinitro-4-fluorophenol	c1c(cc(c(c1[N+](=O)[O-])O)[N+](=O)[O-])F	55	85673
1533	2,6-dinitrobenzonitrile	c1cc(c(c(c1)[N+](=O)[O-])C#N)[N+](=O)[O-]	148	454200
1534	2,6-dinitrotoluene	Cc1c(cccc1[N+](=O)[O-])[N+](=O)[O-]	64.5	11320
1535	2,6-diphenylphenol	c1ccc(cc1)c2cccc(c2O)c3ccccc3	102	68038
1536	2,6-diphenylpyridine	c1ccc(cc1)c2cccc(n2)c3ccccc3	78	65752
1537	2,6-di-tert-butyl-4-ethylphenol	CCc1cc(c(c(c1)C(C)(C)C)O)C(C)(C)C	43.5	18924
1538	2,6-di-tert-butyl-4-methylpyridine	Cc1cc(nc(c1)C(C)(C)C)C(C)(C)C	33	89326
1539	2,6-di-tert-butylphenol	CC(C)(C)c1cccc(c1O)C(C)(C)C	37.5	29135
1540	2,6-pyridinedimethanol	c1cc(nc(c1)CO)CO	112	64119
1541	2,7-diacetoxynaphthalene	CC(=O)Oc1ccc2ccc(cc2c1)OC(=O)C	131	691590
1542	2,7-dibromo-9-fluorenone	c1cc-2c(cc1Br)C(=O)c3c2ccc(c3)Br	202	228145
1543	2,7-dibromofluorene	c1cc-2c(cc1Br)Cc3c2ccc(c3)Br	166	123526
1544	2,7-dihydroxynaphthalene	c1cc(cc2c1ccc(c2)O)O	189.5	10919
1545	2,7-dimethoxynaphthalene	COc1ccc2ccc(cc2c1)OC	138	69467
1546	2,7-dimethyloctane	CC(C)CCCCC(C)C	-54.63	13451
1547	2,8-bis(trifluoromethyl)-4-hydroxyquinoline	c1cc2c(cc(nc2c(c1)C(F)(F)F)C(F)(F)F)O	132	643280
1548	2-[dimethyl(p-tolyl)silyl]benzyl alcohol	Cc1ccc(cc1)[Si](C)(C)c2ccccc2CO	56	25027428
1549	2-[n,n-bis(trifluoromethylsulfonyl)amino]-5-chloropyridine	c1cc(ncc1Cl)N(S(=O)(=O)C(F)(F)F)S(=O)(=O)C(F)(F)F	46	344376
1550	2-[n,n-bis(trifluoromethylsulfonyl)amino]pyridine	c1ccnc(c1)N(S(=O)(=O)C(F)(F)F)S(=O)(=O)C(F)(F)F	39	465381
1551	2-acetamido-5-aminopyridine	CC(=O)Nc1ccc(cn1)N	149	2016916
1552	2-acetamido-5-bromobenzoic acid	CC(=O)Nc1ccc(cc1C(=O)O)Br	223	454389
1553	2-acetamido-5-bromopyridine	CC(=O)Nc1ccc(cn1)Br	177	258677
1554	2-acetamido-5-chlorothiazole	CC(=O)Nc1ncc(s1)Cl	210	3872134
1555	2-acetamido-5-nitropyridine	CC(=O)Nc1ccc(cn1)[N+](=O)[O-]	200	306078
1556	2-acetamido-6-chlorobenzoic acid	CC(=O)Nc1cccc(c1C(=O)O)Cl	217	79430
1557	2-acetamidothiazole	CC(=O)Nc1nccs1	203	16659
1558	2'-acetoxyacetophenone	CC(=O)c1ccccc1OC(=O)C	90	15847
1559	2-acetyl-1-naphthol	CC(=O)c1ccc2ccccc2c1O	100	62933
1560	2-acetyl-3,6-difluorobenzoic acid	CC(=O)c1c(ccc(c1C(=O)O)F)F	86	2049917
1561	2-acetyl-3-amino-5-phenylthiophene	CC(=O)c1c(cc(s1)c2ccccc2)N	121	2086295
1562	2-acetyl-3-aminothiophene	CC(=O)c1c(ccs1)N	86	2016929
1563	2-acetyl-3-bromothiophene	CC(=O)c1c(ccs1)Br	43	2045172
1564	2-acetyl-3-methylbenzo[b]thiophene	Cc1c2ccccc2sc1C(=O)C	78	453232
1565	2-acetyl-5-chlorothiophene	CC(=O)c1ccc(s1)Cl	49	72763
1566	2-acetyl-5-iodothiophene	CC(=O)c1ccc(s1)I	128	87183
1567	2-acetyl-5-nitrobenzo[b]furan	CC(=O)c1cc2cc(ccc2o1)[N+](=O)[O-]	175	453597
1568	2-acetyl-5-nitrothiophene	CC(=O)c1ccc(s1)[N+](=O)[O-]	106	35097
1569	2-acetyl-6-methoxynaphthalene	CC(=O)c1ccc2cc(ccc2c1)OC	108	69913
1570	2-acetyl-7-methoxybenzo[b]furan	CC(=O)c1cc2cccc(c2o1)OC	93	36022
1571	2-acetylanthracene	CC(=O)c1ccc2cc3ccccc3cc2c1	190	4347393
1572	2-acetylbenzo[b]thiophene	CC(=O)c1cc2ccccc2s1	87	81059
1573	2-acetylbenzoic acid	CC(=O)c1ccccc1C(=O)O	115.8	61749
1574	2-acetylfluorene	CC(=O)c1ccc-2c(c1)Cc3c2cccc3	130	63103
1575	2-acetylnaphthalene	CC(=O)c1ccc2ccccc2c1	54.5	6855
1576	2-acetylpyrazine	CC(=O)c1cnccn1	77	28682
1577	2-acetylpyridine	CC(=O)c1ccccn1	9	13648
1578	2-acetylpyrrole	CC(=O)c1ccc[nH]1	90	13459
1579	2-acetylquinoxaline	CC(=O)c1cnc2ccccc2n1	78	9280950
1580	2-adamantanol	C1C2CC3CC1CC(C2)C3O	301	57723
1581	2-allyl-4,6-dibenzoylresorcinol	C=CCc1c(c(cc(c1O)C(=O)c2ccccc2)C(=O)c3ccccc3)O	161	5373917
1582	2-allylphenol	C=CCc1ccccc1O	-6	14864
1583	2-amino-1,3,4-thiadiazole	c1nnc(s1)N	191	18755
1584	2-amino-1,3-propanediol	C(C(CO)N)O	54	61591
1585	2-amino-1-butanol	CCC(CO)N	-2	20788
1586	2-amino-1-propanol	CC(CO)N	8	4945
1587	2-amino-2',5-dichlorobenzophenone	c1ccc(c(c1)C(=O)c2cc(ccc2N)Cl)Cl	88	17070
1588	2-amino-2-methyl-1-propanol	CC(C)(CO)N	27	13835861
1589	2-amino-3-(trifluoromethyl)benzoic acid	c1cc(c(c(c1)C(F)(F)F)N)C(=O)O	155	525554
1590	2-amino-3,4,5-trimethoxybenzoic acid	COc1cc(c(c(c1OC)OC)N)C(=O)O	139	87213
1591	2-amino-3,5-dibromo-6-methylpyridine	Cc1c(cc(c(n1)N)Br)Br	145	456205
1592	2-amino-3,5-dibromobenzoic acid	c1c(cc(c(c1C(=O)O)N)Br)Br	233	190263
1593	2-amino-3,5-dibromopyrazine	c1c(nc(c(n1)N)Br)Br	116	538806
1594	2-amino-3,5-dibromopyridine	c1c(cnc(c1Br)N)Br	104	89283
1595	2-amino-3,5-dichlorobenzoic acid	c1c(cc(c(c1C(=O)O)N)Cl)Cl	226	68531
1596	2-amino-3,5-dichloropyridine	c1c(cnc(c1Cl)N)Cl	82	70278
1597	2-amino-3,5-difluoropyridine	c1c(cnc(c1F)N)F	57	2063381
1598	2-amino-3,5-dimethylbenzoic acid	Cc1cc(c(c(c1)C(=O)O)N)C	192	228067
1599	2-amino-3,6-dichlorobenzoic acid	c1cc(c(c(c1Cl)C(=O)O)N)Cl	153.5	525531
1600	2-amino-3,6-difluoro-4-(trifluoromethyl)pyridine	c1c(c(c(nc1F)N)F)C(F)(F)F	67	2062953
1601	2-amino-3-benzyloxypyridine	c1ccc(cc1)COc2cccnc2N	93	81554
1602	2-amino-3-bromo-5-(trifluoromethyl)pyridine	c1c(cnc(c1Br)N)C(F)(F)F	100	10809898
1603	2-amino-3-bromo-5-chloropyridine	c1c(cnc(c1Br)N)Cl	84	2044650
1604	2-amino-3-bromo-5-methylbenzoic acid	Cc1cc(c(c(c1)Br)N)C(=O)O	204	2054799
1605	2-amino-3-bromo-5-methylpyridine	Cc1cc(c(nc1)N)Br	72	453034
1606	2-amino-3-bromo-5-nitrobenzonitrile	c1c(cc(c(c1C#N)N)Br)[N+](=O)[O-]	188	78637
1607	2-amino-3-bromopyridine	c1cc(c(nc1)N)Br	66	714367
1608	2-amino-3-chlorobenzonitrile	c1cc(c(c(c1)Cl)N)C#N	95	10508175
1609	2-amino-3-chloropyrazine	c1cnc(c(n1)N)Cl	169	243075
1610	2-amino-3-chloropyridine	c1cc(c(nc1)N)Cl	61	604083
1611	2-amino-3-cyanopyridine	c1cc(c(nc1)N)C#N	134	714889
1612	2-amino-3-ethyl-6-methylpyridine	CCc1ccc(nc1N)C	47	2284275
1613	2-amino-3-fluoro-5-(trifluoromethyl)pyridine	c1c(cnc(c1F)N)C(F)(F)F	66	21429357
1614	2-amino-3-fluoropyridine	c1cc(c(nc1)N)F	41	2043507
1615	2-amino-3-hydroxypyridine	c1cc(c(nc1)N)O	170	26152
1616	2-amino-3-iodo-5-methylpyridine	Cc1cc(c(nc1)N)I	88	21242468
1617	2-amino-3-iodopyridine	c1cc(c(nc1)N)I	90	2043841
1618	2-amino-3-methyl-5-nitropyridine	Cc1cc(cnc1N)[N+](=O)[O-]	260	2016198
1619	2-amino-3-methylbenzoic acid	Cc1cccc(c1N)C(=O)O	176	70478
1620	2-amino-3-nitrobenzoic acid	c1cc(c(c(c1)[N+](=O)[O-])N)C(=O)O	211	190402
1621	2-amino-3-nitropyridine	c1cc(c(nc1)N)[N+](=O)[O-]	166	70279
1622	2-amino-4-(1-naphthyl)thiazole	c1ccc2c(c1)cccc2c3csc(n3)N	157	133380
1623	2-amino-4-(2-naphthyl)thiazole	c1ccc2cc(ccc2c1)c3csc(n3)N	155	586588
1624	2-amino-4-(4-bromophenyl)thiazole	c1cc(ccc1c2csc(n2)N)Br	184	539361
1625	2-amino-4-(4-chlorophenyl)thiazole	c1cc(ccc1c2csc(n2)N)Cl	169	65995
1626	2-amino-4-(p-tolyl)thiazole	Cc1ccc(cc1)c2csc(n2)N	137	213410
1627	2-amino-4-(trifluoromethyl)pyridine	c1cnc(cc1C(F)(F)F)N	73	2058573
1628	2-amino-4,5-difluorobenzoic acid	c1c(c(cc(c1F)F)N)C(=O)O	182	643108
1629	2'-amino-4',5'-dimethoxyacetophenone	CC(=O)c1cc(c(cc1N)OC)OC	106	523409
1630	2-amino-4,5-dimethoxybenzonitrile	COc1cc(c(cc1OC)N)C#N	99	643110
1631	2-amino-4,6-dichloropyrimidine-5-carboxaldehyde	C(=O)c1c(nc(nc1Cl)N)Cl	220	233350
1632	2-amino-4,6-dimethoxypyrimidine	COc1cc(nc(n1)N)OC	95	106290
1633	2-amino-4-bromopyridine	c1cnc(cc1Br)N	146	604094
1634	2-amino-4-chloro-6-isopropylpyrimidine	CC(C)c1cc(nc(n1)N)Cl	100	2054031
1635	2-amino-4-chloro-6-methylpyrimidine	Cc1cc(nc(n1)N)Cl	184	20500
1636	2-amino-4-chlorobenzonitrile	c1cc(c(cc1Cl)N)C#N	161	148708
1637	2-amino-4-chlorobenzothiazole	c1cc2c(c(c1)Cl)nc(s2)N	204	27756
1638	2-amino-4-chlorophenol	c1cc(c(cc1Cl)N)O	141	6995
1639	2-amino-4-cyanopyridine	c1cnc(cc1C#N)N	150	5378572
1640	2-amino-4-ethylpyridine	CCc1ccnc(c1)N	67	105844
1641	2-amino-4-fluorobenzoic acid	c1cc(c(cc1F)N)C(=O)O	194	2007081
1642	2-amino-4-fluorophenol	c1cc(c(cc1F)N)O	140	2017599
1643	2-amino-4-hydroxy-6-(trifluoromethyl)pyrimidine	c1c(nc(nc1O)N)C(F)(F)F	290	203961
1644	2-amino-4-methoxy-6-(methylthio)-1,3,5-triazine	COc1nc(nc(n1)SC)N	201	32251
1645	2-amino-4-methoxy-6-methylpyrimidine	Cc1cc(nc(n1)N)OC	161	510436
1646	2-amino-4-methoxybenzothiazole	COc1cccc2c1nc(s2)N	156	20321
1647	2-amino-4-methyl-3-nitropyridine	Cc1ccnc(c1[N+](=O)[O-])N	136	212572
1648	2-amino-4-methyl-5-nitropyridine	Cc1cc(ncc1[N+](=O)[O-])N	224	212571
1649	2-amino-4-methylbenzonitrile	Cc1ccc(c(c1)N)C#N	92	2079989
1650	2-amino-4-methylbenzothiazole	Cc1cccc2c1nc(s2)N	138	14403
1651	2-amino-4-methylphenol	Cc1ccc(c(c1)N)O	136	6994
1652	2-amino-4-methylpyridine	Cc1ccnc(c1)N	99	1479
1653	2-amino-4-methylpyrimidine	Cc1ccnc(n1)N	160	7651
1654	2-amino-4-methylthiazole	Cc1csc(n1)N	44.75	66754
1655	2-amino-4-methylthiophene-3-carboxamide	Cc1csc(c1C(=O)N)N	174	259355
1656	2-amino-4-nitrophenol	c1cc(c(cc1[N+](=O)[O-])N)O	143.5	2848685
1657	2-amino-4-phenylthiazole	c1ccc(cc1)c2csc(n2)N	150	36822
1658	2-amino-4-tert-butylthiazole	CC(C)(C)c1csc(n1)N	101	2015958
1659	2-amino-5-(4-pyridyl)-1,3,4-thiadiazole	c1cnccc1c2nnc(s2)N	245	108254
1660	2-amino-5-(trifluoromethyl)pyridine	c1cc(ncc1C(F)(F)F)N	47	643016
1661	2-amino-5,6-dihydro-4h-cyclopenta[b]thiophene-3-carbonitrile	C1Cc2c(sc(c2C#N)N)C1	154	226542
1662	2-amino-5-bromo-3,4-dimethylpyridine	Cc1c(c(ncc1Br)N)C	134	5373880
1663	2-amino-5-bromo-3-methylpyridine	Cc1cc(cnc1N)Br	92	121582
1664	2-amino-5-bromo-3-nitropyridine	c1c(cnc(c1[N+](=O)[O-])N)Br	208	122478
1665	2-amino-5-bromo-4-methylpyridine	Cc1cc(ncc1Br)N	150	714362
1666	2-amino-5-bromopyrazine	c1c(ncc(n1)Br)N	115	521210
1667	2-amino-5-bromopyridine	c1cc(ncc1Br)N	138	63790
1668	2-amino-5-bromopyrimidine	c1c(cnc(n1)N)Br	233	201527
1669	2-amino-5-chloro-2'-fluorobenzophenone	c1ccc(c(c1)C(=O)c2cc(ccc2N)Cl)F	95	63107
1670	2-amino-5-chloro-3-fluoropyridine	c1c(cnc(c1F)N)Cl	96	9840165
1671	2-amino-5-chloro-3-iodopyridine	c1c(cnc(c1I)N)Cl	97	9251159
1672	2-amino-5-chloro-3-nitropyridine	c1c(cnc(c1[N+](=O)[O-])N)Cl	193	194763
1673	2-amino-5-chlorobenzaldehyde	c1cc(c(cc1Cl)C=O)N	72	2054307
1674	2-amino-5-chlorobenzamide	c1cc(c(cc1Cl)C(=O)N)N	171	71211
1675	2-amino-5-chlorobenzenesulfonamide	c1cc(c(cc1Cl)S(=O)(=O)N)N	149	13594575
1676	2-amino-5-chlorobenzonitrile	c1cc(c(cc1Cl)C#N)N	96.5	72274
1677	2-amino-5-chlorobenzophenone	c1ccc(cc1)C(=O)c2cc(ccc2N)Cl	97.67	12339
1678	2-amino-5-chlorobenzyl alcohol	c1cc(c(cc1Cl)CO)N	108	510021
1679	2-amino-5-chloropyridine	c1cc(ncc1Cl)N	137	59561
1680	2-amino-5-chloropyrimidine	c1c(cnc(n1)N)Cl	235	71792
1681	2-amino-5-cyanopyridine	c1cc(ncc1C#N)N	162	714890
1682	2-amino-5-cyclopropyl-1,3,4-thiadiazole	C1CC1c2nnc(s2)N	214	625671
1683	2-amino-5-ethyl-1,3,4-thiadiazole	CCc1nnc(s1)N	200.635	24633
1684	2-amino-5-ethylthio-1,3,4-thiadiazole	CCSc1nnc(s1)N	132	91679
1685	2-amino-5-fluorobenzoic acid	c1cc(c(cc1F)C(=O)O)N	183	91637
1686	2-amino-5-fluorophenol	c1cc(c(cc1F)O)N	138	161483
1687	2-amino-5-fluoropyridine	c1cc(ncc1F)N	95	2019333
1688	2-amino-5-iodopyridine	c1cc(ncc1I)N	128	79922
1689	2-amino-5-iodopyrimidine	c1c(cnc(n1)N)I	219	210698
1690	2-amino-5-methoxybenzoic acid	COc1ccc(c(c1)C(=O)O)N	151	244660
1691	2-amino-5-methyl-4-phenylthiazole	Cc1c(nc(s1)N)c2ccccc2	110	86773
1692	2-amino-5-methylphenol	Cc1ccc(c(c1)O)N	157	68571
1693	2-amino-5-methylthiazole	Cc1cnc(s1)N	97	312333
1694	2-amino-5-nitrobenzonitrile	c1cc(c(cc1[N+](=O)[O-])C#N)N	209	26545
1695	2-amino-5-nitrobenzophenone	c1ccc(cc1)C(=O)c2cc(ccc2N)[N+](=O)[O-]	165	14916
1696	2-amino-5-nitropyrimidine	c1c(cnc(n1)N)[N+](=O)[O-]	237	68960
1697	2-amino-5-n-propylsulfonylbenzimidazole	CCCS(=O)(=O)c1ccc2c(c1)nc([nH]2)N	221	79502
1698	2-amino-5-phenylpyridine	c1ccc(cc1)c2ccc(nc2)N	135	94822
1699	2-amino-5-tert-butyl-1,3,4-thiadiazole	CC(C)(C)c1nnc(s1)N	183	148794
1700	2-amino-5-trifluoromethyl-1,3,4-thiadiazole	c1(nnc(s1)N)C(F)(F)F	225	74571
1701	2-amino-6-(trifluoromethyl)pyridine	c1cc(nc(c1)N)C(F)(F)F	88	717331
1702	2-amino-6-bromopyridine	c1cc(nc(c1)Br)N	90	265823
1703	2-amino-6-chlorobenzoic acid	c1cc(c(c(c1)Cl)C(=O)O)N	155	67623
1704	2-amino-6-chlorobenzonitrile	c1cc(c(c(c1)Cl)C#N)N	135	73129
1705	2-amino-6-chlorobenzothiazole	c1cc2c(cc1Cl)sc(n2)N	200	6956
1706	2-amino-6-chloropyridine	c1cc(nc(c1)Cl)N	71	178702
1707	2-amino-6-ethoxybenzothiazole	CCOc1ccc2c(c1)sc(n2)N	162	6924
1708	2-amino-6-fluorobenzoic acid	c1cc(c(c(c1)F)C(=O)O)N	166	454576
1709	2-amino-6-fluorobenzonitrile	c1cc(c(c(c1)F)C#N)N	127	455918
1710	2-amino-6-fluorobenzothiazole	c1cc2c(cc1F)sc(n2)N	184	283242
1711	2-amino-6-fluoropyridine	c1cc(nc(c1)F)N	60	2042129
1712	2-amino-6-methoxy-3-nitropyridine	COc1ccc(c(n1)N)[N+](=O)[O-]	171	3077533
1713	2-amino-6-methoxybenzothiazole	COc1ccc2c(c1)sc(n2)N	165	14869
1714	2-amino-6-methylbenzothiazole	Cc1ccc2c(c1)sc(n2)N	141	16405
1715	2-amino-6-nitrobenzothiazole	c1cc2c(cc1[N+](=O)[O-])sc(n2)N	248	21284
1716	2'-aminoacetanilide	CC(=O)Nc1ccccc1N	135	10676
1717	2-aminoanthracene	c1ccc2cc3cc(ccc3cc2c1)N	237	11443
1718	2-aminobenzamide	c1ccc(c(c1)C(=O)N)N	112	10298355
1719	2-aminobenzanilide	c1ccc(cc1)NC(=O)c2ccccc2N	132	70518
1720	2-aminobenzeneboronic acid	B(c1ccccc1N)(O)O	189	2053640
1721	2-aminobenzenesulfonamide	c1ccc(c(c1)N)S(=O)(=O)N	155	65726
1722	2-aminobenzhydrazide	c1ccc(c(c1)C(=O)NN)N	123	85476
1723	2-aminobenzimidazole	c1ccc2c(c1)[nH]c(n2)N	230	13035
1724	2-aminobenzonitrile	c1ccc(c(c1)C#N)N	48.67	65745
1725	2-aminobenzophenone	c1ccc(cc1)C(=O)c2ccccc2N	107	68569
1726	2-aminobenzyl alcohol	c1ccc(c(c1)CO)N	85.875	20149
1727	2-aminobiphenyl	c1ccc(cc1)c2ccccc2N	50.37	6748
1728	2-aminoethyl diphenylborinate	B(c1ccccc1)(c2ccccc2)OCCN	189	1540
1729	2-aminofluorene	c1ccc-2c(c1)Cc3c2ccc(c3)N	128	1484
1730	2-aminopyrazine	c1cnc(cn1)N	120	71088
1731	2-aminopyridine-3-carboxaldehyde	c1cc(c(nc1)N)C=O	101	644660
1732	2-aminopyridine-4-carboxamide	c1cnc(cc1C(=O)N)N	258	312218
1733	2-aminopyridine-4-carboxylic acid	c1cnc(cc1C(=O)O)N	301	245055
1734	2-aminopyridine-4-methanol	c1cnc(cc1CO)N	83	1246676
1735	2-aminopyridine-5-thiocarboxamide	c1cc(ncc1C(=S)N)N	174	3153071
1736	2-aminopyrimidine	c1cnc(nc1)N	126.25	7690
1737	2-aminothiazole	c1csc(n1)N	91.5	2070
1738	2-aminothiazole-5-carbonitrile	c1c(sc(n1)N)C#N	185	8233061
1739	2-anilino-4,6-di(4-morpholinyl)-1,3,5-triazine	c1ccc(cc1)Nc2nc(nc(n2)N3CCOCC3)N4CCOCC4	173	655475
1740	2-benzimidazoleacetonitrile	c1ccc2c(c1)[nH]c(n2)CC#N	209	19265
1741	2-benzothiazoleacetonitrile	c1ccc2c(c1)nc(s2)CC#N	101	303555
1742	2-benzothiazolemethanol	c1ccc2c(c1)nc(s2)CO	98	235671
1743	2-benzoyl-1,3-indanedione	c1ccc(cc1)C(=O)C2C(=O)c3ccccc3C2=O	108	85740
1744	2-benzoylbenzoic acid	c1ccc(cc1)C(=O)c2ccccc2C(=O)O	128	6554
1745	2-benzoylnaphthalene	c1ccc(cc1)C(=O)c2ccc3ccccc3c2	81	62721
1746	2-benzylaminopyridine	c1ccc(cc1)CNc2ccccn2	95	21847
1747	2-benzylcyclohexanone	c1ccc(cc1)CC2CCCCC2=O	29	89370
1748	2-benzylidenecyclohexanone	c1ccc(cc1)C=C2CCCCC2=O	54	89352
1749	2-benzyloxy-3-hydroxypyridine	c1ccc(cc1)COc2c(cccn2)O	71	21107920
1750	2-benzyloxy-4,5-dimethoxybenzaldehyde	COc1cc(c(cc1OC)OCc2ccccc2)C=O	140	490135
1751	2-benzyloxy-5-bromopyridine	c1ccc(cc1)COc2ccc(cn2)Br	47	9283327
1752	2-benzyloxy-5-bromopyrimidine	c1ccc(cc1)COc2ncc(cn2)Br	102	21242437
1753	2-benzyloxy-5-fluorobenzeneboronic acid	B(c1cc(ccc1OCc2ccccc2)F)(O)O	119	2062811
1754	2-benzyloxy-5-hydroxypyridine	c1ccc(cc1)COc2ccc(cn2)O	92	21107919
1755	2-benzyloxyaniline	c1ccc(cc1)COc2ccccc2N	37	210181
1756	2-benzyloxybenzaldehyde	c1ccc(cc1)COc2ccccc2C=O	47	305749
1757	2-benzyloxybenzeneboronic acid	B(c1ccccc1OCc2ccccc2)(O)O	98	2053675
1758	2-benzyloxybenzoic acid	c1ccc(cc1)COc2ccccc2C(=O)O	77	1415125
1759	2-benzyloxyphenylacetic acid	c1ccc(cc1)COc2ccccc2CC(=O)O	97	453504
1760	2-benzyloxyphenylacetonitrile	c1ccc(cc1)COc2ccccc2CC#N	77	487876
1761	2-benzyloxypyridine-3-boronic acid	B(c1cccnc1OCc2ccccc2)(O)O	146	21242318
1762	2-benzylpyridine	c1ccc(cc1)Cc2ccccn2	11.25	7300
1763	2-biphenylmethanol	c1ccc(cc1)c2ccccc2CO	49.5	68709
1764	2-bromo-1,3,5-trifluorobenzene	c1c(cc(c(c1F)Br)F)F	4	67931
1765	2-bromo-1,3-dimethoxybenzene	COc1cccc(c1Br)OC	93	532247
1766	2-bromo-1,4-dichlorobenzene	c1cc(c(cc1Cl)Br)Cl	34.5	14309
1767	2-bromo-1,4-difluorobenzene	c1cc(c(cc1F)Br)F	-31	61179
1768	2-bromo-1-indanol	c1ccc2c(c1)CC(C2O)Br	130	86140
1769	2-bromo-1-indanone	c1ccc2c(c1)CC(C2=O)Br	38	120903
1770	2-bromo-1-tritylimidazole	c1ccc(cc1)C(c2ccccc2)(c3ccccc3)n4ccnc4Br	205	537293
1771	2-bromo-2',3',4',5',6'-pentafluoroacetophenone	C(C(=O)c1c(c(c(c(c1F)F)F)F)F)Br	31	2056289
1772	2-bromo-2',4'-dimethoxyacetophenone	COc1ccc(c(c1)OC)C(=O)CBr	104	89124
1773	2-bromo-2'-hydroxyacetophenone	c1ccc(c(c1)C(=O)CBr)O	46	173716
1774	2-bromo-2'-methoxyacetophenone	COc1ccccc1C(=O)CBr	44	110036
1775	2-bromo-2'-nitroacetophenone	c1ccc(c(c1)C(=O)CBr)[N+](=O)[O-]	55	213373
1776	2-bromo-2-nitropropane-1,3-diol	C(C(CO)([N+](=O)[O-])Br)O	129.25	2356
1777	2-bromo-3'-(trifluoromethyl)acetophenone	c1cc(cc(c1)C(F)(F)F)C(=O)CBr	22	2058642
1778	2-bromo-3-(trifluoromethyl)pyridine	c1cc(c(nc1)Br)C(F)(F)F	38	4365407
1779	2-bromo-3',4'-dichloroacetophenone	c1cc(c(cc1C(=O)CBr)Cl)Cl	57	214055
1780	2-bromo-3,5-bis(trifluoromethyl)aniline	c1c(cc(c(c1C(F)(F)F)Br)N)C(F)(F)F	35	3511117
1781	2-bromo-3',5'-di-tert-butyl-4'-hydroxyacetophenone	CC(C)(C)c1cc(cc(c1O)C(C)(C)C)C(=O)CBr	106	535513
1782	2-bromo-3-chloropyridine	c1cc(c(nc1)Br)Cl	60	5379338
1783	2-bromo-3-fluorobenzoic acid	c1cc(c(c(c1)F)Br)C(=O)O	159	267469
1784	2-bromo-3-fluoroisovaleric acid	CC(C)(C(C(=O)O)Br)F	54	280103
1785	2-bromo-3-hydroxypyridine	c1cc(c(nc1)Br)O	184	21591
1786	2-bromo-3-iodo-5-methylpyridine	Cc1cc(c(nc1)Br)I	85	21242391
1787	2-bromo-3'-methoxyacetophenone	COc1cccc(c1)C(=O)CBr	62	91526
1788	2-bromo-3-methyl-5-nitropyridine	Cc1cc(cnc1Br)[N+](=O)[O-]	57	4371808
1789	2-bromo-3'-nitroacetophenone	c1cc(cc(c1)[N+](=O)[O-])C(=O)CBr	94	67758
1790	2-bromo-3-nitropyridine	c1cc(c(nc1)Br)[N+](=O)[O-]	124	482681
1791	2-bromo-4'-(1-pyrrolidinyl)acetophenone	c1cc(ccc1C(=O)CBr)N2CCCC2	121	2914307
1792	2-bromo-4'-(diethylamino)acetophenone	CCN(CC)c1ccc(cc1)C(=O)CBr	51	2073913
1793	2-bromo-4-(trifluoromethyl)aniline	c1cc(c(cc1C(F)(F)F)Br)N	30	84751
1794	2-bromo-4-(trifluoromethyl)benzenesulfonamide	c1cc(c(cc1C(F)(F)F)Br)S(=O)(=O)N	162	2058654
1795	2-bromo-4,5-dimethoxycinnamic acid	COc1cc(c(cc1OC)Br)/C=C/C(=O)O	255	642982
1796	2-bromo-4,6-dichloroaniline	c1c(cc(c(c1Cl)N)Br)Cl	81.75	21168862
1797	2-bromo-4,6-difluoroaniline	c1c(cc(c(c1F)N)Br)F	40	120059
1798	2-bromo-4,6-difluorobenzenesulfonamide	c1c(cc(c(c1F)S(=O)(=O)N)Br)F	126	16812345
1799	2-bromo-4,6-dimethylaniline	Cc1cc(c(c(c1)Br)N)C	44	149132
1800	2-bromo-4,6-di-tert-butylphenol	CC(C)(C)c1cc(c(c(c1)Br)O)C(C)(C)C	57	453430
1801	2-bromo-4-chloroaniline	c1cc(c(cc1Cl)Br)N	66	63298
1802	2-bromo-4-chlorophenol	c1cc(c(cc1Cl)Br)O	33	62871
1803	2-bromo-4-cyanopyridine	c1cnc(cc1C#N)Br	72	9910251
1804	2-bromo-4-fluoro-5-(trifluoromethyl)aniline	c1c(c(cc(c1N)Br)F)C(F)(F)F	27	21168663
1805	2'-bromo-4'-fluoroacetanilide	CC(=O)Nc1ccc(cc1Br)F	118	599665
1806	2-bromo-4'-fluoroacetophenone	c1cc(ccc1C(=O)CBr)F	47	87353
1807	2-bromo-4-fluorobenzoic acid	c1cc(c(cc1F)Br)C(=O)O	168	1064837
1808	2-bromo-4-fluorobenzonitrile	c1cc(c(cc1F)Br)C#N	76	106283
1809	2-bromo-4-fluorophenol	c1cc(c(cc1F)Br)O	44	526306
1810	2-bromo-4-iodopyridine	c1cnc(cc1I)Br	61	901677
1811	2-bromo-4'-methoxyacetophenone	COc1ccc(cc1)C(=O)CBr	70	4795
1812	2-bromo-4-methoxyphenylacetic acid	COc1ccc(c(c1)Br)CC(=O)O	129	3184086
1813	2'-bromo-4'-methylacetanilide	Cc1ccc(c(c1)Br)NC(=O)C	118	62414
1814	2-bromo-4-methylaniline	Cc1ccc(c(c1)Br)N	18.33	10942
1815	2-bromo-4-methylbenzaldehyde	Cc1ccc(c(c1)Br)C=O	35	3835008
1816	2-bromo-4-methylphenol	Cc1ccc(c(c1)Br)O	16	21627
1817	2-bromo-4-nitro-1,3,5-trimethylbenzene	Cc1cc(c(c(c1[N+](=O)[O-])C)Br)C	60	2037960
1818	2-bromo-4'-nitroacetophenone	c1cc(ccc1C(=O)CBr)[N+](=O)[O-]	97	60204
1819	2-bromo-4-nitroanisole	COc1ccc(cc1Br)[N+](=O)[O-]	106	71205
1820	2-bromo-4-nitrophenetole	CCOc1ccc(cc1Br)[N+](=O)[O-]	55	13734224
1821	2-bromo-4-nitropyridine n-oxide	c1c[n+](c(cc1[N+](=O)[O-])Br)[O-]	145	3127338
1822	2-bromo-4-nitrotoluene	Cc1ccc(cc1Br)[N+](=O)[O-]	76.67	74171
1823	2-bromo-4'-phenylacetophenone	c1ccc(cc1)c2ccc(cc2)C(=O)CBr	125	60614
1824	2-bromo-4-pyridinemethanol	c1cnc(cc1CO)Br	61	14325008
1825	2-bromo-5-(trifluoromethyl)benzyl alcohol	c1cc(c(cc1C(F)(F)F)CO)Br	72	2037012
1826	2-bromo-5-(trifluoromethyl)phenylacetonitrile	c1cc(c(cc1C(F)(F)F)CC#N)Br	61	2063390
1827	2-bromo-5-(trifluoromethyl)pyridine	c1cc(ncc1C(F)(F)F)Br	46	2018101
1828	2-bromo-5-chloro-3-methylbenzo(b)thiophene	Cc1c2cc(ccc2sc1Br)Cl	106	2017235
1829	2-bromo-5-chlorobenzoic acid	c1cc(c(cc1Cl)C(=O)O)Br	154	80332
1830	2-bromo-5-chlorobenzotrifluoride	c1cc(c(cc1Cl)C(F)(F)F)Br	19	119948
1831	2-bromo-5-fluoroaniline	c1cc(c(cc1F)N)Br	44	2053738
1832	2-bromo-5-fluorobenzaldehyde	c1cc(c(cc1F)C=O)Br	54	2053742
1833	2-bromo-5-fluorobenzoic acid	c1cc(c(cc1F)C(=O)O)Br	155	2058440
1834	2-bromo-5-fluorobenzonitrile	c1cc(c(cc1F)C#N)Br	90	84538
1835	2-bromo-5-fluorobenzyl bromide	c1cc(c(cc1F)CBr)Br	35	451922
1836	2-bromo-5-fluorocinnamic acid	c1cc(c(cc1F)/C=C/C(=O)O)Br	190	4647139
1837	2-bromo-5-fluoropyridine	c1cc(ncc1F)Br	29	2063314
1838	2-bromo-5-iodo-3-methylpyridine	Cc1cc(cnc1Br)I	45	8284206
1839	2-bromo-5-iodo-4-methylpyridine	Cc1cc(ncc1I)Br	51	21242424
1840	2-bromo-5-iodobenzoic acid	c1cc(c(cc1I)C(=O)O)Br	175	2017259
1841	2-bromo-5-iodopyridine	c1cc(ncc1I)Br	124	3925513
1842	2-bromo-5-methoxybenzamide	COc1ccc(c(c1)C(=O)N)Br	160	2010679
1843	2-bromo-5-methoxybenzoic acid	COc1ccc(c(c1)C(=O)O)Br	158	81154
1844	2-bromo-5-methylpyridine	Cc1ccc(nc1)Br	43	490509
1845	2-bromo-5-nitroaniline	c1cc(c(cc1[N+](=O)[O-])N)Br	139	74546
1846	2-bromo-5-nitroanisole	COc1cc(ccc1Br)[N+](=O)[O-]	104	91525
1847	2-bromo-5-nitrobenzoic acid	c1cc(c(cc1[N+](=O)[O-])C(=O)O)Br	180	212451
1848	2-bromo-5-nitrobenzotrifluoride	c1cc(c(cc1[N+](=O)[O-])C(F)(F)F)Br	43	119974
1849	2-bromo-5-nitropyridine	c1cc(ncc1[N+](=O)[O-])Br	138	70615
1850	2-bromo-5-nitrothiazole	c1c(sc(n1)Br)[N+](=O)[O-]	88	17200
1851	2-bromo-5-nitrothiophene	c1cc(sc1[N+](=O)[O-])Br	44	75087
1852	2-bromo-5-nitrotoluene	Cc1cc(ccc1Br)[N+](=O)[O-]	78	220493
1853	2-bromo-6-(trifluoromethyl)pyridine	c1cc(nc(c1)Br)C(F)(F)F	50	2063046
1854	2-bromo-6-chloro-4-(trifluoromethyl)aniline	c1c(cc(c(c1Cl)N)Br)C(F)(F)F	31	644260
1855	2-bromo-6-chloro-4-fluoroaniline	c1c(cc(c(c1Cl)N)Br)F	56	534050
1856	2-bromo-6-chloro-4-nitroaniline	c1c(cc(c(c1Cl)N)Br)[N+](=O)[O-]	175	60196
1857	2-bromo-6-chlorobenzoic acid	c1cc(c(c(c1)Br)C(=O)O)Cl	149	30618
1858	2-bromo-6-fluoropyridine	c1cc(nc(c1)Br)F	32	554862
1859	2-bromo-6-methoxynaphthalene	COc1ccc2cc(ccc2c1)Br	108	71123
1860	2-bromo-6-methoxyphenol	COc1cccc(c1O)Br	64	9195140
1861	2-bromo-6-methylbenzoic acid	Cc1cccc(c1C(=O)O)Br	109	2017276
1862	2-bromo-6-nitro-4-(trifluoromethyl)aniline	c1c(cc(c(c1[N+](=O)[O-])N)Br)C(F)(F)F	71	128340
1863	2-bromo-6-nitrophenol	c1cc(c(c(c1)Br)O)[N+](=O)[O-]	68	10332929
1864	2-bromo-6-nitrotoluene	Cc1c(cccc1Br)[N+](=O)[O-]	40	110131
1865	2-bromoacetamide	C(C(=O)N)Br	89	62834
1866	2'-bromoacetanilide	CC(=O)Nc1ccccc1Br	99	120188
1867	2-bromoacetophenone	c1ccc(cc1)C(=O)CBr	50	6023
1868	2-bromoacrylic acid	C=C(C(=O)O)Br	68	74570
1869	2-bromoadamantane	C1C2CC3CC1CC(C2)C3Br	139	455764
1870	2-bromobenzaldehyde	c1ccc(c(c1)C=O)Br	21.6	21111817
1871	2-bromobenzaldoxime	c1ccc(c(c1)C=NO)Br	102	643344
1872	2-bromobenzeneboronic acid	B(c1ccccc1Br)(O)O	109	2053715
1873	2-bromobenzenesulfonamide	c1ccc(c(c1)S(=O)(=O)N)Br	192	2079976
1874	2-bromobenzenesulfonyl chloride	c1ccc(c(c1)S(=O)(=O)Cl)Br	50	453936
1875	2-bromobenzhydrazide	c1ccc(c(c1)C(=O)NN)Br	153	91680
1876	2-bromobenzimidazole	c1ccc2c(c1)[nH]c(n2)Br	198	2056600
1877	2-bromobenzoic acid	c1ccc(c(c1)C(=O)O)Br	148.5	6674
1878	2-bromobenzonitrile	c1ccc(c(c1)C#N)Br	55.17	15440
1879	2-bromobenzoyl chloride	c1ccc(c(c1)C(=O)Cl)Br	10.5	22012
1880	2-bromobenzyl alcohol	c1ccc(c(c1)CO)Br	80.5	65682
1881	2-bromobenzyl bromide	c1ccc(c(c1)CBr)Br	31	69414
1882	2-bromobutyric acid	CCC(C(=O)O)Br	-4	6403
1883	2-bromoethanol	C(CBr)O	-80	10436
1884	2-bromofluorene	c1ccc-2c(c1)Cc3c2ccc(c3)Br	112.75	13697
1885	2-bromohexanoic acid	CCCCC(C(=O)O)Br	4	11294432
1886	2-bromoindene	c1ccc2c(c1)CC(=C2)Br	36	500428
1887	2-bromoisobutyric acid	CC(C)(C(=O)O)Br	46	10790335
1888	2-bromoisovaleric acid	CC(C)C(C(=O)O)Br	41.5	10794
1889	2-bromomesitylene	Cc1cc(c(c(c1)C)Br)C	2	21112244
1890	2-bromo-m-xylene	Cc1cccc(c1Br)C	-10	13875201
1891	2-bromonaphthalene	c1ccc2cc(ccc2c1)Br	56	10894
1892	2-bromonicotinic acid	c1cc(c(nc1)Br)C(=O)O	254	203366
1893	2-bromopentane	CCCC(C)Br	-96	7602
1894	2-bromophenoxyacetonitrile	c1ccc(c(c1)OCC#N)Br	49	2015964
1895	2-bromophenylacetic acid	c1ccc(c(c1)CC(=O)O)Br	106	79171
1896	2-bromopropionic acid	CC(C(=O)O)Br	25	11236
1897	2-bromopyridine-4-carboxaldehyde	c1cnc(cc1C=O)Br	54	2043689
1898	2-bromopyridine-4-carboxamide	c1cnc(cc1C(=O)N)Br	192	3816070
1899	2-bromopyrimidine	c1cnc(nc1)Br	55	70715
1900	2-bromoquinoline-3-boronic acid	B(c1cc2ccccc2nc1Br)(O)O	146	16498301
1901	2-bromoterephthalic acid	c1cc(c(cc1C(=O)O)Br)C(=O)O	299	61788
1902	2-bromotetradecanoic acid	CCCCCCCCCCCCC(C(=O)O)Br	42	59718
1903	2-bromothiazole-5-carboxaldehyde	c1c(sc(n1)Br)C=O	94	2053681
1904	2-bromothiazole-5-carboxylic acid	c1c(sc(n1)Br)C(=O)O	182	2043899
1905	2-bromothioanisole	COc1ccccc1SBr	-24	11548480
1906	2-butyne	CC#CC	-32	9990
1907	2-butyne-1,4-diol	C(C#CCO)O	55	7775
1908	2-butynoic acid	CC#CC(=O)O	77.5	61810
1909	2-butynyl p-toluenesulfonate	CC#CCOS(=O)(=O)c1ccc(cc1)C	48	5381846
1910	2-carboxy-3,4-dimethoxybenzaldehyde	COc1ccc(c(c1OC)C(=O)O)C=O	148.5	61517
1911	2-carboxybenzeneboronic acid	B(c1ccccc1C(=O)O)(O)O	220	2015747
1912	2-carboxymethylthio-4-methylpyrimidine	Cc1ccnc(n1)SCC(=O)O	192	89218
1913	2-chloro-1-(2,4-dichlorophenoxy)-4-nitrobenzene	c1cc(c(cc1[N+](=O)[O-])Cl)Oc2ccc(cc2Cl)Cl	71	2008927
1914	2-chloro-1,3-dibromo-5-fluorobenzene	c1c(cc(c(c1Br)Cl)Br)F	86	2006731
1915	2-chloro-1,3-dinitrobenzene	c1cc(c(c(c1)[N+](=O)[O-])Cl)[N+](=O)[O-]	87	21242790
1916	2-chloro-1,4-dibromobenzene	c1cc(c(cc1Br)Cl)Br	40	21242146
1917	2-chloro-1-fluoro-4-nitrobenzene	c1cc(c(cc1[N+](=O)[O-])Cl)F	44	21171397
1918	2-chloro-1-iodo-4-nitrobenzene	c1cc(c(cc1[N+](=O)[O-])Cl)I	99	87248
1919	2-chloro-1-methylimidazole	Cn1ccnc1Cl	-10	2053751
1920	2-chloro-1-tritylimidazole	c1ccc(cc1)C(c2ccccc2)(c3ccccc3)n4ccnc4Cl	201	2053756
1921	2-chloro-2,2-difluoroacetamide	C(=O)(C(F)(F)Cl)N	82	61034
1922	2-chloro-2',4'-difluoroacetophenone	c1cc(c(cc1F)F)C(=O)CCl	46	511201
1923	2-chloro-2',6'-diethylacetanilide	CCc1cccc(c1NC(=O)CCl)CC	130	86962
1924	2-chloro-2',6'-dimethylacetanilide	Cc1cccc(c1NC(=O)CCl)C	148	63963
1925	2-chloro-2'-nitroacetanilide	c1ccc(c(c1)NC(=O)CCl)[N+](=O)[O-]	88	193114
1926	2-chloro-3-(trifluoromethyl)aniline	c1cc(c(c(c1)N)Cl)C(F)(F)F	27	4164467
1927	2-chloro-3-(trifluoromethyl)benzaldehyde	c1cc(c(c(c1)C(F)(F)F)Cl)C=O	44	2018330
1928	2-chloro-3-(trifluoromethyl)benzoic acid	c1cc(c(c(c1)C(F)(F)F)Cl)C(=O)O	134	2018335
1929	2-chloro-3-(trifluoromethyl)benzonitrile	c1cc(c(c(c1)C(F)(F)F)Cl)C#N	40	2842431
1930	2-chloro-3-(trifluoromethyl)benzyl alcohol	c1cc(c(c(c1)C(F)(F)F)Cl)CO	76	2058368
1931	2-chloro-3-(trifluoromethyl)benzylamine	c1cc(c(c(c1)C(F)(F)F)Cl)CN	36	4394445
1932	2-chloro-3-(trifluoromethyl)phenylacetic acid	c1cc(c(c(c1)C(F)(F)F)Cl)CC(=O)O	132	3052959
1933	2-chloro-3-(trifluoromethyl)phenylacetonitrile	c1cc(c(c(c1)C(F)(F)F)Cl)CC#N	58	4370981
1934	2-chloro-3-(trifluoromethyl)pyridine	c1cc(c(nc1)Cl)C(F)(F)F	39	512734
1935	2-chloro-3',4'-dihydroxyacetophenone	c1cc(c(cc1C(=O)CCl)O)O	174	60198
1936	2-chloro-3,4-dimethoxybenzonitrile	COc1ccc(c(c1OC)Cl)C#N	102	2055507
1937	2-chloro-3,4-dimethoxybenzyl alcohol	COc1ccc(c(c1OC)Cl)CO	71	2055505
1938	2-chloro-3,4-dimethoxycinnamic acid	COc1ccc(c(c1OC)Cl)/C=C/C(=O)O	195	4647242
1939	2-chloro-3,5-diiodopyridine	c1c(cnc(c1I)Cl)I	73	549232
1940	2-chloro-3,5-dinitrobenzoic acid	c1c(cc(c(c1C(=O)O)Cl)[N+](=O)[O-])[N+](=O)[O-]	199	16326
1941	2-chloro-3,5-dinitrobenzotrifluoride	c1c(cc(c(c1C(F)(F)F)Cl)[N+](=O)[O-])[N+](=O)[O-]	63	61168
1942	2-chloro-3,5-dinitropyridine	c1c(cnc(c1[N+](=O)[O-])Cl)[N+](=O)[O-]	63	68255
1943	2-chloro-3,6-difluoroaniline	c1cc(c(c(c1F)N)Cl)F	29	16499432
1944	2-chloro-3,6-difluorobenzaldehyde	c1cc(c(c(c1F)C=O)Cl)F	47	2053925
1945	2-chloro-3,6-difluorobenzoic acid	c1cc(c(c(c1F)C(=O)O)Cl)F	127	2053946
1946	2-chloro-3,6-difluorobenzyl alcohol	c1cc(c(c(c1F)CO)Cl)F	47	2053957
1947	2-chloro-3,6-difluorophenol	c1cc(c(c(c1F)O)Cl)F	54	2053976
1948	2-chloro-3-cyano-4,6-dimethylpyridine	Cc1cc(nc(c1C#N)Cl)C	99	193892
1949	2-chloro-3-cyano-5-phenylpyridine	c1ccc(cc1)c2cc(c(nc2)Cl)C#N	145	2044721
1950	2-chloro-3-cyano-6-methylpyridine	Cc1ccc(c(n1)Cl)C#N	116	453934
1951	2-chloro-3-cyanopyridine	c1cc(c(nc1)Cl)C#N	107	73147
1952	2-chloro-3-fluoro-4-nitropyridine n-oxide	c1c[n+](c(c(c1[N+](=O)[O-])F)Cl)[O-]	177	5379339
1953	2-chloro-3-hydroxypyridine	c1cc(c(nc1)Cl)O	170	73202
1954	2-chloro-3-iodopyridine	c1cc(c(nc1)Cl)I	95	2017429
1955	2-chloro-3-methoxypyridine	COc1cccnc1Cl	47	94117
1956	2-chloro-3-methylquinoline	Cc1cc2ccccc2nc1Cl	83	300559
1957	2-chloro-3-methylquinoxaline	Cc1c(nc2ccccc2n1)Cl	73	206218
1958	2-chloro-3'-nitroacetanilide	c1cc(cc(c1)[N+](=O)[O-])NC(=O)CCl	114	463445
1959	2-chloro-3-nitropyridine	c1cc(c(nc1)Cl)[N+](=O)[O-]	101	71920
1960	2-chloro-4-(methylsulfonyl)benzoic acid	CS(=O)(=O)c1ccc(c(c1)Cl)C(=O)O	194	643017
1961	2'-chloro-4'-(trifluoromethyl)acetanilide	CC(=O)Nc1ccc(cc1Cl)C(F)(F)F	136	2018329
1962	2-chloro-4-(trifluoromethyl)benzeneboronic acid	B(c1ccc(cc1Cl)C(F)(F)F)(O)O	111	2063394
1963	2-chloro-4-(trifluoromethyl)benzenesulfonamide	c1cc(c(cc1C(F)(F)F)Cl)S(=O)(=O)N	170	2054334
1964	2-chloro-4-(trifluoromethyl)benzenesulfonyl chloride	c1cc(c(cc1C(F)(F)F)Cl)S(=O)(=O)Cl	37	2018333
1965	2-chloro-4-(trifluoromethyl)benzonitrile	c1cc(c(cc1C(F)(F)F)Cl)C#N	83	2018142
1966	2-chloro-4-(trifluoromethyl)nicotinic acid	c1cnc(c(c1C(F)(F)F)C(=O)O)Cl	159	9944821
1967	2-chloro-4,5-difluorobenzoic acid	c1c(c(cc(c1F)F)Cl)C(=O)O	106	644235
1968	2-chloro-4,5-difluorobenzonitrile	c1c(c(cc(c1F)F)Cl)C#N	35	3300422
1969	2-chloro-4,5-dimethylphenol	Cc1cc(c(cc1C)Cl)O	71	63919
1970	2-chloro-4,6-bis(ethylamino)-1,3,5-triazine	CCNc1nc(nc(n1)Cl)NCC	227	5027
1971	2-chloro-4,6-dibromoaniline	c1c(cc(c(c1Cl)N)Br)Br	100	3502035
1972	2-chloro-4,6-difluoroaniline	c1c(cc(c(c1F)N)Cl)F	30	2015841
1973	2-chloro-4,6-dimethoxy-1,3,5-triazine	COc1nc(nc(n1)Cl)OC	77	17426
1974	2-chloro-4,6-dinitroaniline	c1c(cc(c(c1[N+](=O)[O-])N)Cl)[N+](=O)[O-]	155.5	17987
1975	2-chloro-4-cyanobenzenesulfonyl chloride	c1cc(c(cc1C#N)Cl)S(=O)(=O)Cl	103	2017408
1976	2-chloro-4-cyanopyridine	c1cnc(cc1C#N)Cl	71	494376
1977	2-chloro-4-fluoro-1-nitrobenzene	c1cc(c(cc1F)Cl)[N+](=O)[O-]	35	67570
1978	2-chloro-4-fluoro-3-methylbenzoic acid	Cc1c(ccc(c1Cl)C(=O)O)F	188	9020609
1979	2'-chloro-4'-fluoroacetanilide	CC(=O)Nc1ccc(cc1Cl)F	117	512372
1980	2-chloro-4'-fluoroacetophenone	c1cc(ccc1C(=O)CCl)F	48	107349
1981	2-chloro-4-fluorobenzaldehyde	c1cc(c(cc1F)Cl)C=O	62	127945
1982	2-chloro-4-fluorobenzenesulfonyl chloride	c1cc(c(cc1F)Cl)S(=O)(=O)Cl	30	456078
1983	2-chloro-4-fluorobenzoic acid	c1cc(c(cc1F)Cl)C(=O)O	185	67802
1984	2-chloro-4-fluorobenzonitrile	c1cc(c(cc1F)Cl)C#N	64	98019
1985	2-chloro-4-fluorobenzyl alcohol	c1cc(c(cc1F)Cl)CO	45	4163081
1986	2-chloro-4-fluorobenzyl bromide	c1cc(c(cc1F)Cl)CBr	37	2007169
1987	2-chloro-4-fluorocinnamic acid	c1cc(c(cc1F)Cl)/C=C/C(=O)O	247	4864421
1988	2-chloro-4-fluorophenol	c1cc(c(cc1F)Cl)O	22	67381
1989	2-chloro-4-fluorophenylacetic acid	c1cc(c(cc1F)Cl)CC(=O)O	104	2007168
1990	2-chloro-4-fluorophenylacetonitrile	c1cc(c(cc1F)Cl)CC#N	68	2007170
1991	2-chloro-4h-1,3,2-benzodioxaphosphorin-4-one	c1ccc2c(c1)C(=O)OP(O2)Cl	38	206914
1992	2-chloro-4-hydroxypyridine	c1cnc(cc1O)Cl	171	78485
1993	2-chloro-4-iodo-3-methylpyridine	Cc1c(ccnc1Cl)I	107	8259166
1994	2-chloro-4-iodoaniline	c1cc(c(cc1I)Cl)N	70	249202
1995	2-chloro-4-iodopyridine	c1cnc(cc1I)Cl	43	1247454
1996	2-chloro-4-methoxybenzeneboronic acid	B(c1ccc(cc1Cl)OC)(O)O	202	2053749
1997	2-chloro-4-methoxybenzyl bromide	COc1ccc(c(c1)Cl)CBr	57	11346503
1998	2-chloro-4-methoxyphenol	COc1ccc(c(c1)Cl)O	42	78892
1999	2-chloro-4-methoxyphenylacetonitrile	COc1ccc(c(c1)Cl)CC#N	42	11346581
[truncated: 17,668 more rows]

## Sheet: Density
ID	Smiles	expdens
1	CC(C)(C)C(=O)Nc1ccc(NC(=O)C(C)(C)C)cc1	1.0696
2	CC(C)(C)C(=O)NC1CCC(NC(=O)C(C)(C)C)CC1	1.09677
3	CC1(C)CCCC2(C)C3Cc4occc4C4C(=O)OC(F)C(C43)C12	1.30805
4	CC1(C)CCCC2(C)C3CC4OCCC4C4C(=O)OC(F)C(C43)C12	1.26823
5	Cc1ccc(O)c(C=NC2CCCCC2N=Cc2cc(C)ccc2O)c1	1.17077
6	Cc1ccc(O)c(C=Nc2ccccc2N=Cc2cc(C)ccc2O)c1	1.25915
7	COC1=NC(CC2CCCCC2)C(OC)=NC1Cc1ccccc1	1.13521
8	COC1=NC(Cc2ccccc2)C(OC)=NC1Cc1ccccc1	1.17977
9	O=C(CCl)N(C1CCCCC1)C1CCCCC1	1.20969
10	O=C(CCl)N(c1ccccc1)c1ccccc1	1.32249
11	O=C(COc1c(Br)cc(Br)c2cccnc12)N(c1ccccc1)c1ccccc1	1.66312
12	O=C(COc1c(Br)cc(Br)c2cccnc12)N(C1CCCCC1)C1CCCCC1	1.51606
13	O=C(COc1c(Cl)cc(Cl)c2cccnc12)N(c1ccccc1)c1ccccc1	1.38723
14	O=C(COc1c(Cl)cc(Cl)c2cccnc12)N(C1CCCCC1)C1CCCCC1	1.30148
15	O=C(NC1CCCCC1)c1ccccc1	1.17861
16	O=C(NC1CCCCC1)c1cccnc1	1.22513
17	O=C(Nc1ccccc1)c1ccccc1	1.31003
18	O=C(Nc1ccccc1)c1cccnc1	1.35356
19	O=C(Nc1ccccc1)Oc1ccccc1	1.30392
20	O=C(NC1CCCCC1)Oc1ccccc1	1.17805
21	O=C1c2ccc3c4c(ccc(c24)C(=O)N1c1ccccc1)C(=O)N(c1ccccc1)C3=O	1.40279
22	O=C1c2ccc3c4c(ccc(c24)C(=O)N1C1CCCCC1)C(=O)N(C1CCCCC1)C3=O	1.39223
23	O=C1CCC2C(O)C3OCCC3CN12	1.3871
24	O=C1CCC2C(O)c3occc3CN12	1.41051
25	[CH]([N][N][C]([C]([N][N][CH]c1ccccn1)c1ccccc1)c1ccccc1)c1ccccn1	1.26352
26	[CH]([N][N][CH]c1ccncc1)c1ccncc1	1.29049
27	[N-]=[N+]=Nc1nc(N=Nc2nc(N=[N+]=[N-])nc(N=[N+]=[N-])n2)nc(N=[N+]=[N-])n1	1.689
28	BrCCCCn1c2ccccc2c2ccccc21	1.42643
29	C#CC1(O)CCC2C3CCC4=CC(=O)C=CC4(C)C3CCC21C	1.19766
30	C#CC1CN2CCC1CC2CO	1.14964
31	C#CCN1CC(=O)N(CCOC)CC(=O)N(c2ccccc2)CC(=O)N(c2ccccc2)CC(=O)N(CC#C)CC(=O)N(CCOC)CC(=O)N(c2ccccc2)CC(=O)N(c2ccccc2)CC1=O	1.28313
32	C#CCOc1ccc(C=O)c(OCC#C)c1	1.28888
33	C(=CC=Cc1ccccc1)C=Cc1ccccc1	1.11262
34	C(=Cc1cc(-c2ccccc2)c(C=Cc2ccccc2)cc1-c1ccccc1)c1ccccc1	1.16514
35	C(=Cc1ccc(N(c2ccccc2)c2ccccc2)cc1)c1ccc(-c2cc(-c3ccccn3)nc(-c3ccccn3)c2)cc1	1.24318
36	C(=Nc1ccc(Cc2ccc(N=Cc3cccnc3)cc2)cc1)c1cccnc1	1.27209
37	C(=Nc1ccccc1P(c1ccccc1)c1ccccc1)c1ccccc1	1.20744
38	C(C=C(c1ccccc1)c1ccccc1)=C(c1ccccc1)c1ccccc1	1.16606
39	C[PH]1(c2ccccc2)[N][PH](C)(c2ccccc2)[N][PH](C)(c2ccccc2)[N][PH](C)(c2ccccc2)[N]1	1.11969
40	C[Si](C)(C)C(=C1c2ccccc2C(=O)N1n1cccc1)c1ccccc1	1.18278
41	C[Si]1(C)OC2(CCCCCCCCCCC2)OOC2(CCCCCCCCCCC2)O1	1.08134
42	C=C(C(=O)O)C1C=C2C(C)CCCC2(C)CC1	1.15562
43	C=C(C)C(N)=O	1.12814
44	C=CC(C(O)c1ccc(OC)cc1)C(C)(O)c1ccccc1	1.17496
45	C=CC(C)(O)C1CC2C(=CCC3C(C)(C)CCCC23C)C(=O)O1	1.16201
46	C=CC1(C)CCC2C34OC5OC(=O)C(C=C3C=C(OC)OC(=O)C14)C52C	1.30858
47	C=CC1C(O[Si](c2ccccc2)(c2ccccc2)C(C)(C)C)CC2OC(=O)CC21	1.13957
48	C1=NCCN2CCNC2c2cccc(c2)C=NCCN2CCNC2c2cccc1c2	1.21957
49	C1C2CC3C4CC5CC(C14)C(C2)C3C5=C1C2CC3C4CC5CC3C1C(C5)C4C2	1.23208
50	c1cc(-n2c3ccccc3c3ccccc32)cc(-n2c3ccccc3c3ccccc32)c1	1.25587
51	c1ccc([Si]2(c3ccccc3)O[Si](c3ccccc3)(c3ccccc3)O[Si](c3ccccc3)(c3ccccc3)O2)cc1	1.22133
52	c1ccc(C(=C(c2ccccc2)c2ccccc2)c2ccccc2)cc1	1.15362
53	c1ccc(C2=NC3CCCCC3N=C2c2ccccc2)cc1	1.18482
54	c1ccc(-c2ccccc2Nc2ccccc2-c2ccccc2)cc1	1.21384
55	c1ccc(-c2nc(-c3ccccc3)c(-c3ccccc3)nc2-c2ccccc2)cc1	1.23659
56	c1ccc(-c2nc3c4cccnc4c4ncccc4c3[nH]2)cc1	1.35225
57	c1ccc(-c2oc(-c3ccccc3)c3ccccc23)cc1	1.27195
58	c1ccc(CN(Cc2ccccc2)c2ccccc2)cc1	1.1512
59	c1ccc(CNc2ccccn2)cc1	1.22188
60	c1ccc(Nc2ccc(Nc3ccccn3)cc2)nc1	1.32459
61	c1ccc(NCc2cccc(CNc3ccccn3)c2)nc1	1.24796
62	C1CCC2(CC1)OOC1(CCCCC1)OOC1(OO2)C2CC3CC(C2)CC1C3	1.26938
63	c1ccc2[nH]c(-c3ccc(-c4nc5ccccc5[nH]4)cc3)nc2c1	1.35117
64	c1ccc2c(c1)CCC2=C1CCc2ccccc21	1.21662
65	c1ccc2c(c1)ncc1ccc3cnc4ccccc4c3c12	1.35541
66	c1ccc2c(c1)ncn2-c1ccc(-c2ccc(-n3cnc4ccccc43)cc2)cc1	1.36018
67	c1ccc2c(-c3ccc4ccc5cccc6ccc3c4c56)c3ccccc3cc2c1	1.25705
68	c1ccc2cc3c(cc2c1)Nc1cc2ccccc2cc1N3	1.40666
69	c1ccccc1	1.16595
70	C1Cn2nnnc2N1	1.52373
71	CC(=NNc1ccc([N+](=O)[O-])cc1[N+](=O)[O-])c1cccc(Cl)c1	1.51178
72	CC(=O)c1c(C)nn(-c2ccccc2)c1O	1.3104
73	CC(=O)c1ccc(O)cc1	1.26145
74	CC(=O)C1CCC2C34COC5(O)C(OC(=O)C25C1O)C3C(C)(C)CCC4O	1.38147
75	CC(=O)Nc1cccc(CN(Cc2cccc(NC(C)=O)n2)Cc2c3ccccc3cc3ccccc23)n1	1.27034
76	CC(=O)NC1OC(COC(C)=O)C(OC(C)=O)C(OC(C)=O)C1Cl	1.40098
77	CC(=O)OC1C2C(C)C2C(OC(=O)C23CCC(C)(C(=O)O2)C3(C)C)C1(C)C	1.20023
78	CC(=O)OC1C2CO[N][C]2C2OC(C)(C)OC21	1.32489
79	CC(=O)OC1CCC2(C)C3CCC4(C)C(=O)CCC4C3CCC2C1OC(C)=O	1.14842
80	CC(=O)Oc1ccccc1C(=O)O	1.39401
81	CC(C(=O)O)N1C(=O)c2ccccc2C1=O	1.42897
82	CC(C)(C)C(=O)Nc1ccccc1Cl	1.22037
83	CC(C)(C)c1ccc(C(=O)CCCN2CCC(OC(c3ccccc3)c3ccccc3)CC2)cc1	1.1182
84	CC(C)(C)c1ccc(C=Cc2ccc3ccc4ccc5ccccc5c4c3c2)cc1	1.18048
85	CC(C)(C)OC(=O)N1C(C(O)C2(C)COC(C(Cl)(Cl)Cl)=N2)COC1(C)C	1.33678
86	CC(C)(C)OC1CCN2OC3C4COC(O4)C(=O)C3C12	1.29886
87	CC(C)[Si](C#Cc1c2ccccc2c(C#C[Si](C(C)C)(C(C)C)C(C)C)c2nc3c(Cl)c(Cl)c(Cl)c(Cl)c3nc12)(C(C)C)C(C)C	1.23837
88	CC(C)=NNC(=O)c1ccc(O)cc1	1.27669
89	CC(C)C1COC(=O)N1C1CCCN2CCCC12	1.16837
90	CC(C)CC(C(O)C1CCOC1=O)N(Cc1ccccc1)Cc1ccccc1	1.1303
91	CC(C)CCCC(C)C1CCC2C3CCC4CC5(C)CCCC=C5C(=O)C4(C)C3CCC12C	1.06237
92	CC(C)N(c1ccc(C#N)cc1)C(C)C	1.08532
93	CC(C)OC(=O)c1c2ccccc2cc2ccccc12	1.22
94	CC(Cl)Cl	1.51478
95	CC(I)C1CCC2C3CCC4=CC(=O)CCC4(C)C3CCC12C	1.43861
96	CC(NC(=O)c1ccccc1Cl)c1ccccc1	1.27135
97	CC(NC(=O)OC(C)(C)C)C1CCC(C(=O)O)O1	1.1692
98	CC(NCc1ccc(OCc2cccc(F)c2)cc1)C(N)=O	1.2534
99	CC(O)C#CC#CC(C)O	1.11265
100	CC(O)C(C)C(O)c1ccccc1	1.14624
101	CC1([N+](=O)[O-])C=CC(C)([N+](=O)[O-])C([N+](=O)[O-])C1O[N+](=O)[O-]	1.645
102	CC1(C)C2Cc3cc(-c4cnc(-c5cc6c(cn5)C5CC(C6)C5(C)C)cn4)ncc3C1C2	1.16989
103	CC1(C)C2CCC1(C)C(Oc1cccc(-c3cccc(-c4ccccn4)n3)n1)C2	1.2102
104	CC1(C)CC(C=Cc2ccc(N(CCCl)CCCl)cc2)=CC(=C(C#N)C#N)C1	1.24876
105	CC1(C)CCCC2(C)C(Cl)(Cl)C23CCC2(C)OC2C13	1.26885
106	CC1(C)CCCC2(CO2)C2CCC3(C)OC3C21	1.15437
107	CC1(C)OC(C(C)(O)c2ccccc2)C(C(C)(O)c2ccccc2)O1	1.16941
108	CC1(C)OC2[CH]N([O])C(CBr)C2O1	1.65299
109	CC1(C)OC2CCc3ccc(-c4ccc5c(n4)C4OC(C)(C)OC4CC5)nc3C2O1	1.24747
110	CC1(C)OC2OC(Cn3nncc3C3OC4OC(C)(C)OC4C3OCc3ccccc3)C(O)C2O1	1.29272
111	CC1(O)OC(=O)c2ccccc21	1.36122
112	CC1=C(O)CCCC1=O	1.28921
113	CC1=CC2CC3(O)OC(=O)C=C3C(C)(C)C2CC1	1.23193
114	CC1=CC2OC3CC(O)C(C)(C2(C)CC1)C31CO1	1.2325
115	CC1=NC(=Cc2cccc(O)c2)C(=O)N1C	1.33874
116	CC12C=CC(=O)C=C1CCC1C2C(O)CC2(C)C1CCC2(O)C(=O)COC(=O)CCC(=O)O	1.30959
117	CC12CCC3C(CC(O)C4=CC(=O)OCC43C)C1CCC2=O	1.27054
118	CC12CCC3C(CCC34CC(=O)CCC4=O)C1CCC2O	1.24596
119	CC12CCC3C(CCC4C(O)C(O)CCC43C)C1CCC2=O	1.19351
120	CC12CCC3C(CCC4CC(=O)CCC43C)C1CCC2=O	1.1612
121	CC1C(=O)OCC(=O)NC(C(C)c2ccccc2)C(O)(c2ccccc2)c2cccc1c2	1.28491
122	CC1C(O)CC=C(Br)C12OCCO2	1.62018
123	CC1C=CC2CCCCC2C1C(=O)C1(Br)C(=O)N2CCC3C(=O)OC1C32O	1.47355
124	Cc1cc(C(c2cc(C)c(O)c(C)c2)c2ccccc2F)cc(C)c1O	1.20917
125	Cc1cc(C)c(C(=O)c2c(C)c(C)c(C(=O)c3c(C)cc(C)cc3C)c(C)c2C)c(C)c1	1.17574
126	Cc1cc(O)c2c(c1)C(=O)c1ccc3c(c1C2=O)OC12OC(C)C4C(C)(O)C(=O)C=C(C(=O)c5c(O)cccc51)C342	1.43522
127	Cc1cc2c(c(C(C)(C)C)c1)OP(=O)(O)Oc1c(cc(C)cc1C(C)(C)C)C2	1.19068
128	Cc1ccc([N][N]c2ccc(C)c(C)c2)cc1C	1.19155
129	Cc1ccc(C(=O)c2cn(C)c3ccccc23)cc1	1.23679
130	Cc1ccc(C(=O)OC2C(OC(=O)c3ccc(C)cc3)C(OC(=O)c3ccc(C)cc3)C(OC(=O)c3ccc(C)cc3)C(OC(=O)c3ccc(C)cc3)C2OC(=O)c2ccc(C)cc2)cc1	1.19705
131	Cc1ccc(C(C)C)c(O)c1	1.09522
132	Cc1ccc(C=CC(=O)c2ccccc2)cc1	1.19918
133	Cc1ccc(C=CC(N)=O)cc1	1.18396
134	Cc1ccc(C=Cc2cc(-c3ccccc3)c(C=Cc3ccc(C)cc3)cc2-c2ccccc2)cc1	1.13233
135	Cc1ccc(CN(Cc2ccc(C)cc2)c2nc(C#N)c(N(Cc3ccc(C)cc3)Cc3ccc(C)cc3)nc2C#N)cc1	1.2282
136	CC1CCCC(CC2Cc3cc(O)cc(O)c3C(=O)O2)O1	1.2904
137	CCC(=O)OCC1OC(OC)C(O)C(O)C1O	1.35545
138	CCC(C)N(CC(O)C1CCC(=O)N1Cc1ccccc1Cl)C(C)CC	1.16328
139	CCC(CO)NCCNC(CC)CO	1.10921
140	CCC1CCC(=O)N2C(CO)Cc3c([nH]c4ccccc34)C12	1.25562
141	CCCCCCCCCCCCCCCC(=O)NCCOC(=O)CCCCCCCCCCC	1.0612
142	CCCCCCCCCCCCCCCC(=O)NCCOC(=O)CCCCCCCCCCCCC	1.01688
143	CCCCn1c2ccccc2c(=O)c2cc3c(cc21)c(=O)c1ccccc1n3CCCC	1.30569
144	CCCCOc1ccc(C=Cc2c3ccccc3c(C=Cc3ccc(OCCCC)cc3)c3ccccc23)cc1	1.17827
145	CCN(c1ccccc1)P(N(CC)c1ccccc1)N(CC)c1ccccc1	1.19456
146	CCN(CC)c1ccc([CH][N][N][CH]c2ccc(N(CC)CC)cc2O)c(O)c1	1.20105
147	CCN(CC)c1ccc2cc(C(=O)NN)c(=O)oc2c1	1.35238
148	CCn1nc(C)c(Cl)c1C(OC(=O)C(C)(C)C)=C(C#N)c1ccc(C(C)(C)C)cc1	1.15419
149	CCOC(=O)C=Cc1ccc(O)c(O)c1	1.34461
150	CCOC(=O)c1[nH]c(C)c(C(C)=O)c1C	1.26387
151	CCOC(=O)C1C(c2ccc(Cl)cc2)N(C(=O)c2ccccc2)C(C(=O)OC)C1C(F)(F)F	1.39635
152	CCOC(=O)c1c(O)c(Br)c(C(=O)OCC)c(O)c1Br	1.89699
153	CCOC(=O)c1c(O)cc(-c2ccc(F)cc2)cc1-c1ccc(F)cc1	1.34397
154	CCOC(=O)C1C=C(c2ccc(Br)cc2)OC(=O)C1Cc1ccccc1	1.45653
155	CCOC(=O)C1C2C3C4=C(C5CCC4C5)C(C4C(=O)OC(=O)C43)C12	1.3627
156	CCOC(=O)c1ccc(N)cc1	1.2042
157	CCOC(=O)CC	1.32093
158	CCOc1ccc(N=C(C)c2ccccc2O)cc1	1.22608
159	Cl[C]1N=C[N]c2c1ncn2C1CCOC1CCOCc1ccccc1	1.36892
160	Clc1cc(Cl)c(OCC#CI)cc1Cl	2.12651
161	CN(C)c1ccc(C(O)(c2ccc(N(C)C)cc2)c2ccc(N(C)C)cc2)cc1	1.15925
162	CN(C)c1ccc(C(O)(c2ccncc2)c2ccc(N(C)C)cc2)cc1	1.18281
163	CN(C)c1ccc(C=C(C#N)C#N)cc1	1.24351
164	CN(C)c1ccc(C=NCCN=Cc2ccc(N(C)C)cc2)cc1	1.20566
165	CN(C)Cc1ccccc1P(c1ccccc1CN(C)C)c1ccccc1CN(C)C	1.11256
166	CN(c1ccccc1)N1C(=O)c2ccccc2C1=O	1.32649
167	Cn1c(=O)[nH]c2c(F)c(F)c(F)c(F)c21	1.76432
168	Cn1c(=O)c2[nH]cnc2n(C)c1=O	1.5075
169	Cn1cc(-c2cc3ccccc3n2C)c2ccccc21	1.23545
170	COC(=O)[C](C(=O)OC)c1ccc([C](C(=O)OC)C(=O)OC)cc1	1.41083
171	COC(=O)C(C(C)C)N1CCC(C)(O)C([N+](=O)[O-])C1c1ccccc1	1.19097
172	COC(=O)C(Cc1ccccc1)NC(=O)C(C)(C)C(NC(=O)c1ccccc1)C(C)C	1.14175
173	COC(=O)C(Cc1ccccc1)NC(=O)C(C)(C)C(NC(=O)c1ccccc1)c1ccccc1	1.1945
174	COC(=O)C(NC(=O)C(C)(C)NC(=O)C(C)NC(=O)C(C)(C)NC(=O)C1CCCN1C(=O)OC(C)(C)C)C(C)C	1.17475
175	COC(=O)C(NC(=O)C(C)(C)NC(=O)C(Cc1ccccc1)NC(=O)C(C)(C)NC(=O)C1CCCN1C(=O)OC(C)(C)C)C(C)C	1.16537
176	COC(=O)C(O)C1C(C)(C)C(=O)C2CC3=C4CC(=O)OC(c5ccoc5)C4(C)CCC3C1(C)C2=O	1.31258
177	COC(=O)C=C(c1ccccc1)N1CCCC1=O	1.29731
178	COC(=O)C1(NC(=O)c2ccccc2)C2CCC(C2)C1C(O)CO	1.27429
179	COC(=O)C1=C(O)C(C(=O)OC)C2(O)C(C(=O)OC)C1CC(c1ccccc1Br)C2C(=O)OC	1.51067
180	COC(=O)C1=CC2C(=O)OCC2C(C)(CC(=O)c2ccccc2)O1	1.33837
181	COC(=O)C1Cc2c[nH]c3cccc(c23)C(C=C(C)C)N1	1.18804
182	COC(=O)c1ccc(O)cc1	1.35609
183	COC(=O)C1CCC2CCC(Cl)CC2N1C(=O)OC(C)(C)C	1.2434
184	COC(=O)c1ccc2ccccc2c1O	1.40748
185	COC(=O)CC(NC(=O)CC(NC(=O)OC(C)(C)C)C(C)C)C(C)C	1.12303
186	COC(=O)CCC(NC(=O)CCC(NC(=O)OC(C)(C)C)C(C)C)C(C)C	1.09065
187	COC(=O)COc1ccc2ccc(OCC(=O)OC)cc2c1	1.37592
188	COC1(C)OC2C(O)CC3CON(C)C3C2OC1(C)OC	1.29046
189	COc1cc([CH][N][N][CH]c2cc(OC)c(OC)c(OC)c2)cc(OC)c1OC	1.29381
190	COc1cc(C=C(C#N)C#N)ccc1O	1.30237
191	COc1cc(C=Cc2cnc(C=Cc3cc(OC)c(OC)c(OC)c3)cn2)cc(OC)c1OC	1.30841
192	COc1cc(C=Nc2c(C)n(C)n(-c3ccccc3)c2=O)ccc1O	1.28606
193	COc1cc(C=O)ccc1O	1.34737
194	COc1cc(-c2oc3c(OC)c(OCC=C(C)C)cc(O)c3c(=O)c2OC)ccc1O	1.37767
195	COc1cc(OC)c(C=CC2=CC(=C(C#N)C#N)CC(C)(C)C2)c(OC)c1	1.22133
196	COc1ccc([C]([N]N=C(c2ccccc2)c2ccc(OC)cc2O)c2ccccc2)c(O)c1	1.27273
197	COc1ccc(C(=O)C=CC=Cc2ccccc2)cc1	1.21847
198	COc1ccc(C(=O)C=Cc2ccco2)cc1	1.34071
199	COc1ccc(C(=O)CCN2[CH]N=C[N]2)cc1	1.33825
200	COc1ccc(C(=O)Nn2c(C)c(C(=O)c3ccccc3)c(C(=O)c3ccccc3)c2C)cc1	1.25592
201	COc1ccc(C(C)N2CCC(C)(O)C([N+](=O)[O-])C2c2ccccc2)cc1	1.23454
202	COc1ccc(C=CC(=O)c2ccc(O)cc2)cc1OC	1.28712
203	COc1ccc(C=Cc2cccc(OC)c2O)cc1OC	1.26733
204	COc1ccc(C=Cc2cccc(OC)c2OC(C)=O)cc1OC	1.25241
205	COc1ccc(C=Cc2ccccc2C(=O)O)cc1	1.3179
206	COc1ccc(C=NC(C#N)=C(N)C#N)cc1	1.3183
207	COc1ccc(C=Nc2c(C)n(C)n(-c3ccccc3)c2=O)cc1	1.27652
208	COc1ccc(C2(O)c3ccccc3C(O)(c3ccc(OC)cc3)c3ccccc32)cc1	1.32906
209	COc1ccc(-c2oc3cc(OC)c(OC)c(O)c3c(=O)c2OC)cc1O	1.45623
210	COc1ccc(CCNC(=O)C=C(C)c2ccc(OC)c3oc(C(C)=O)c(N)c23)cc1OC	1.29558
211	COc1ccc2c(c1OC)C(CC1=CC3C(C(C)C)CCC(C)(OC)C3CC1)N(C)c1c-2ccc2cc3c(cc12)OCO3	1.1915
212	COc1ccc2cccc(CCNC(C)=O)c2c1	1.19793
213	COc1cccc(C(=O)CCn2nnc3ccccc32)c1	1.34181
214	COc1cccc(C=NC(c2ccccc2)c2ccccc2)c1O	1.22319
215	COc1cccc(C=Nc2ccccc2N=Cc2cccc(OC)c2O)c1O	1.32305
216	COc1cccc(CNc2ccccc2NCc2cccc(OC)c2O)c1O	1.30843
217	COc1ccccc1C(=O)NN=Cc1cc(Cl)cc(Cl)c1O	1.50357
218	COC1N([N+](=O)[O-])C(OC)N([N+](=O)[O-])C(OC)N1[N+](=O)[O-]	1.611
219	COc1nc2c(c(=O)n1C)N(C(C)=O)C1C(N2)OCC(OC(C)=O)C1OC(C)=O	1.37525
220	COP(=O)(OC)C1N(C(=O)C(Cl)(Cl)Cl)CC2CC3C=CC21O3	1.59582
221	Fc1c(F)c(Nc2ccc(I)cc2)c(F)c(F)c1Nc1ccc(I)cc1	2.18075
222	Fc1ccc(O[PH]2(Oc3ccc(F)cc3)[N][PH](Oc3ccc(F)cc3)(Oc3ccc(F)cc3)[N][PH](Oc3ccc(F)cc3)(Oc3ccc(F)cc3)[N]2)cc1	1.34448
223	ICI	3.86566
224	N#CC(C#N)=C1OC(=O)[C]([C](C2CC2)C2CC2)[C]1[C](c1ccccc1)c1ccccc1	1.25206
225	N#CC(NC1c2ccccc2CC1O)c1ccccc1	1.26516
226	N#Cc1ccc(N(c2ccc(C#N)cc2)c2ccc(C#N)cc2)cc1	1.28086
227	N#Cc1ccc(N=Cc2ccccc2O)cc1	1.3236
228	N#Cc1ccc(-n2c3ccccc3c3ccccc32)cc1	1.24276
229	N#Cc1ccccc1N=Cc1c(O)ccc2ccccc12	1.33289
230	N[C]1N=C[N]c2c1cnn2C1CC(O)C(CO)O1	1.48593
231	NC(=O)C(N=Cc1ccccc1Cl)c1ccccc1	1.34974
232	NC(=O)C=Cc1ccccc1	1.25194
233	NC(=O)c1ccccn1	1.36309
234	NC(=O)CN1CCCC1=O	1.41808
235	NC(=O)N1c2ccccc2C=Cc2ccccc21	1.35568
236	Nc1c(Cl)cc([N+](=O)[O-])cc1[N+](=O)[O-]	1.76369
237	Nc1ccc([N+](=O)[O-])cc1I	2.24976
238	Nc1ccc(C(=O)NN=Cc2cc(Cl)ccc2O)cc1	1.47676
239	Nc1ccc(C(=O)O)cc1	1.37986
240	Nc1ccc(-c2ccc(N)cc2)cc1	1.2245
241	Nc1ccn(C2OC(CO)C(O)C2O)c(=O)n1	1.52563
242	Nc1nc(-c2ccccc2)cc(-c2ccccc2)n1	1.30418
243	Nc1nccnn1	1.46243
244	NCCCO	1.23504
245	Nn1c(CO)nnc1CO	1.52978
246	NNC(=O)C(=O)NN	1.65737
247	NNC(=O)c1ccc(O)cc1	1.50045
248	NNC(=O)c1cccnc1	1.40748
249	O=[N+]([O-])c1c(N2CCOCC2)ncn1CC(O)CCl	1.52988
250	O=[N+]([O-])c1cc([N+](=O)[O-])c(Nc2ccccc2)cc1Nc1ccccc1	1.3857
251	O=[N+]([O-])c1cc([N+](=O)[O-])c(NCCCCO)cc1NCCCCO	1.39823
252	O=[N+]([O-])c1ccc(C=Cc2ccc([N+](=O)[O-])cc2)cc1	1.43856
253	O=[N+]([O-])c1ccc(C=NO)o1	1.62018
254	O=[N+]([O-])c1ccc(C23c4ccccc4-c4cccc(c42)-c2ccccc23)c([N+](=O)[O-])c1	1.39768
255	O=[N+]([O-])c1ccc(NC23CC4CC(CC(C4)C2)C3)nc1	1.30295
256	O=[N+]([O-])c1ccc(NCc2ccncc2)cc1	1.38738
257	O=[N+]([O-])c1ccc(O)c(C=NNc2ccccc2)c1	1.42023
258	O=[N+]([O-])c1ccc(O)cc1	1.4972
259	O=[N+]([O-])c1ccc(OCCN(CCOc2ccc([N+](=O)[O-])cc2)CCOc2ccc([N+](=O)[O-])cc2)cc1	1.3945
260	O=[N+]([O-])c1cccc([N+](=O)[O-])c1	1.59855
261	O=[N+]([O-])c1cccc2cn[nH]c12	1.55904
262	O=[N+]([O-])c1ccccc1C(=C=C(C1=CCCCC1)P(=O)(c1ccccc1)c1ccccc1)P(=O)(c1ccccc1)c1ccccc1	1.31727
263	O=[N+]([O-])N1C2C3N([N+](=O)[O-])C1C1N([N+](=O)[O-])C(C(N1[N+](=O)[O-])N3[N+](=O)[O-])N2[N+](=O)[O-]	1.98167
264	O=[N+]([O-])N1CCn2nnnc21	1.68949
265	O=C(C=C(O)c1ccccc1)c1ccccc1	1.27835
266	O=C(C=CC=CC(=O)OCc1ccccc1)OCc1ccccc1	1.27332
267	O=C(C=Cc1ccccc1O)c1ccccc1O	1.3499
268	O=C(c1ccccc1)c1ccccc1	1.2188
269	O=C(c1ccccc1)N(Cl)c1ccccc1	1.33416
270	O=C(CCC(=O)Nc1ccccc1)Nc1ccccc1	1.35129
271	O=C(CCCCCCC(=O)Nc1ccccc1)Nc1ccccc1	1.25233
272	O=C(CCCCCCC(=O)Nc1ccccc1)NO	1.24473
273	O=C(CCl)Nc1ccc([N+](=O)[O-])cc1	1.56687
274	O=C(COC(=O)c1ccccc1)c1ccccc1	1.29646
275	O=C(NC(=O)c1ccccc1)C(=O)c1ccccc1	1.36347
276	O=C(Nc1ccc(Br)cc1)Nc1ccc(Br)cc1	1.9192
277	O=C(Nc1ccc(Cl)cc1)c1ccccc1	1.40387
278	O=C(NC1CCCCC1)NC1CCCCC1	1.14936
279	O=C(Nc1cccnc1)c1ccc(F)cc1	1.43353
280	O=C(NN=Cc1cc(I)cc(I)c1O)c1ccccc1Cl	2.16316
281	O=C(NN=Cc1ccccc1O)NN=Cc1ccccc1O	1.36629
282	O=C(NN=Cc1ccccn1)c1ccccn1	1.36503
283	O=C(O)C(Cl)Cl	1.97133
284	O=C(O)C(F)(F)C=Cc1ccccc1	1.42728
285	O=C(O)C=C(Br)C(=O)O	2.11694
286	O=C(O)C=Cc1cccc(C=CC(=O)O)c1	1.39609
287	O=C(O)C=Cc1nc2ccccc2o1	1.4303
288	O=C(O)c1c2ccccc2cc2ccccc12	1.39636
289	O=C(O)c1cc([N+](=O)[O-])cc[n+]1[O-]	1.69649
290	O=C(O)c1cc(Cn2cnc3ccccc32)cc(C(=O)O)c1	1.46029
291	O=C(O)c1cc(O)c(O)c(O)c1	1.6572
292	O=C(O)c1ccc(Cn2cnc3ccccc32)cc1	1.34063
293	O=C(O)c1ccc2ccccc2c1O	1.43035
294	O=C(O)c1cccc(-c2ccncc2)c1	1.40025
295	O=C(O)c1cccc(O)c1O	1.56971
296	O=C(O)c1ccccc1C=Cc1ccc(Cl)cc1	1.33563
297	O=C(O)c1cccnc1-c1nnc(-c2ccccn2)n1-c1ccccc1	1.33715
298	O=C(O)Cc1ccccc1Nc1c(Cl)cccc1Cl	1.45918
299	O=C(O)CCC(=O)Nc1cc(Cl)cc(Cl)c1	1.55301
300	O=C(O)CCP(=O)(O)c1ccccc1	1.36163
301	O=C(O)Cn1cc(F)c(=O)[nH]c1=O	1.66582
302	O=C(O)CNC(=O)Nc1ccccc1	1.40836
303	O=C(OC1C2OC3OC1C(OC(=O)c1ccc(Br)cc1)C(O3)C2OC(=O)c1ccc(Br)cc1)c1ccc(Br)cc1	1.80188
304	O=c1[nH]c(=O)n(C2CC(O)C(O)CO2)[nH]1	1.58537
305	O=c1[nH]c(-c2ccccc2)cc2ccccc12	1.32965
306	O=C1C(=C2CCC(=C3C(=O)c4ccccc4C3=O)CC2)C(=O)c2ccccc21	1.43979
307	O=C1C(=Cc2c3ccccc3cc3ccccc23)Cc2ccccc21	1.27972
308	O=C1C(=Cc2ccc(Cl)cc2Cl)CCCC1=Cc1ccc(Cl)cc1Cl	1.48674
309	O=C1C(Cl)=C(C2CCC(c3ccc(Cl)cc3)CC2)C(=O)c2ccccc21	1.39435
310	O=c1c(NCc2ccccc2)c(NCc2ccccc2)c1=O	1.29735
311	O=C1C(O)=C(C2CCC(c3ccc(Cl)cc3)CC2)C(=O)c2ccccc21	1.32912
312	O=C1C(O)=C(I)C(=O)c2ccccc21	2.11177
313	O=c1c2ccccc2[nH]c2cc3c(=O)c4ccccc4[nH]c3cc12	1.55062
314	O=C1c2ccccc2C(=C2c3ccccc3C(=O)c3ccccc32)c2ccccc21	1.35359
315	O=C1c2ccccc2C(=O)c2c1c(C(=O)c1ccccc1)c(-c1ccccc1)n2-c1ccccc1	1.33412
316	O=C1c2ccccc2C(=O)N1CC=CCn1cc(F)c(=O)[nH]c1=O	1.48207
317	O=C1c2ccccc2C(=O)N1Cc1ccccc1	1.34416
318	O=C1c2ccccc2CC2c3cc4c(cc3CCN12)OCO4	1.4079
319	O=C1CC(C2CC(=O)c3cccc(Br)c32)c2c(Br)cccc21	1.75056
320	O=C1CCC(c2ccccc2)(C2(c3ccccc3)CCC(=O)O2)O1	1.33262
321	O=c1ccc(O)n[nH]1	1.60695
322	O=C1CCCCC1C(O)c1ccccc1	1.17895
323	O=C1NC(=O)C2CCCC1C2	1.34016
324	O=C1NCCOCCOCCNC(=O)NCc2cccc(c2)CN1	1.29588
325	O=C1O[PH]2(NC1Cc1ccccc1)NC(Cc1ccccc1)C(=O)O2	1.37595
326	O=C1OC(=O)C2CC3C(=O)OC(=O)C3CC12	1.56912
327	O=c1oc(-c2ccccc2)nc2ccccc12	1.39561
328	O=C1OCC(C2CCCCC2)N1C1CCCN2CCCC12	1.17898
329	O=Cc1cc(O)ccc1Br	1.92902
330	O=Cc1ccc(N(c2ccccc2)c2ccccc2)cc1	1.24257
331	OC1(C(Cl)(Cl)Cl)CCC(c2ccccc2)CC1	1.42418
332	OC1C2OC3(c4ccccc4)OC1C(O)C(O3)C2O	1.50314
333	OC1CC2(O)CC(O)C(O)CC2(O)CC1O	1.49958
334	OC1CCC(O)CC1	1.18193
335	OC1CCCC12OCC1CON(Cc3ccccc3)C1C2O	1.25602
336	Oc1ccccc1C=NC(c1ccccc1)C(O)c1ccccc1	1.27123
337	OCC(F)(F)C(F)(F)C(F)(F)CO	1.85858
338	OCC1CCC(CO)CC1	1.11906
339	OCc1ccc(O)cc1	1.343
340	OCc1cccc(O)c1	1.30271
341	OCC1OC(O)C(O)C(O)C1O	1.58923
342	OCC1OC(OC2(CO)OC(CO)C(O)C2O)C(O)C(O)C1O	1.5895
343	ON=Cc1ccc2cccccc1-2	1.27378
344	[O-][n+]1ccc(CCCc2cc[n+]([O-])cc2)cc1	1.27413
345	BrCc1ccc(CBr)c(-c2cc(CBr)ccc2CBr)c1	1.98919
346	C#CCN(Cc1ccc([N+](=O)[O-])o1)c1ccc(C)cc1	1.31346
347	C(=Cc1nc2ccccc2o1)c1ccc(N(c2ccccc2)c2ccccc2)cc1	1.31182
348	C[C](C)N1N=C(C)O[Si]12(c1ccccc1)(c1ccccc1)OC(C)=NN2[C](C)C	1.23628
349	C=C(c1ccccc1)c1c(-c2ccccc2)n(C)c2ccccc12	1.19758
350	C=C1C2CC3C4N5CC6(C)CCCC47C(C2O)C3(CC5(O)C67)C1O	1.2965
351	C=CCn1c(=O)c2[nH]c(-c3cc(OCC(=O)N4CCN(c5ccccc5)CC4)nn3C)nc2n(CC=C)c1=O	1.35707
352	C1Cc2nnc3c4c(nnc(c24)C1)CCC3	1.3883
353	c1ccc(C(Nc2ccccn2)Nc2ccccn2)cc1	1.24955
354	c1ccc(C2=C(c3ccccc3)[Si](c3ccccc3)(c3ccccc3)C(c3ccccc3)=C2c2ccccc2)cc1	1.18709
355	c1ccc(COCC(n2cccn2)(n2cccn2)n2cccn2)c(COCC(n2cccn2)(n2cccn2)n2cccn2)c1	1.29655
356	c1ccc2c(c1)-c1cccc3cccc-2c13	1.25097
357	CC([N+](=O)[O-])([N+](=O)[O-])C(C)([N+](=O)[O-])[N+](=O)[O-]	1.722
358	CC(=O)c1ccccc1	1.22142
359	CC(=O)CCC1(C(=O)Nc2ccc([N+](=O)[O-])cc2)CCCC1=O	1.34997
360	CC(=O)OC1CCC2(C)C(CCC3C4CC(C=O)=C(Cl)C4(C)CCC32)C1	1.21982
361	CC(C)(C)c1ccc(-n2c(-c3ccccn3)nnc2-c2ccccn2)cc1	1.25913
362	CC(C)(C)c1cccc(C=NO)c1O	1.20245
363	CC(C)(C)OC(=O)C1(c2ccccc2)CNC(c2ccccc2)c2[nH]c3ccccc3c21	1.16649
364	CC(C)(C)OC(=O)C1=C(Nc2ccccc2)CC(c2ccc([N+](=O)[O-])cc2)N(c2ccccc2)C1c1ccc([N+](=O)[O-])cc1	1.29114
365	CC(C)(C)OC(=O)NN(CC(N)=O)Cc1ccccc1	1.20661
366	CC(C)(C)P(c1ccc2ccc3cccc4ccc1c2c34)C(C)(C)C	1.17321
367	CC(C)[Si]1(C(C)C)c2ccccc2-c2c1c1ccccc1n2-c1ccc(C(F)(F)F)cc1	1.23744
368	CC(C)c1cc(C#Cc2ccccc2)cc(C(C)C)c1P	1.08521
369	CC(C)Cc1ccc(C(C)C(=O)O)cc1	1.09687
370	CC(c1ccccc1)N(C)C(=O)C(F)C(F)(F)F	1.32041
371	CC(O)=CC(C)=Nc1c(C)cc(C)c(N)c1C	1.1678
372	CC1(C)c2cccc(-c3ccc(O)c(C=O)c3)c2Oc2c(-c3ccc(O)c(C=O)c3)cccc21	1.31852
373	CC1(C)Cc2nnc3c4c(nnc(c24)C1)CC(C)(C)C3	1.24242
374	CC1(C)CC2ON(c3ccc(Br)cc3)C1CC2=O	1.56766
375	CC1(C)CNP(=O)(NC(=O)C(F)(F)F)NC1	1.50515
376	CC1(C)COC(c2ccc([C]3[N]C(C)(C)C(C)(C)N3[O])cc2)OC1	1.19059
377	CC1(C)OC2(C=C3C(CCC45CC34C(=O)OC5c3ccoc3)O2)CC1C1(C)C=CC(=O)O1	1.28863
378	CC1(C)OC2C(OC(=O)c3ccccc3)C(OC(=O)c3ccccc3)C(O[Si](C)(C)C(C)(C)C)C2O1	1.19763
379	CC1(C)Oc2ccccc2-c2cc(-c3ccc4c(c3)-c3ccccc3OC(C)(C)O4)ccc2O1	1.24407
380	CC1=C(C2COC(C)(C)O2)CCC2(C=O)C(=O)OCC12	1.29528
381	CC12CP(c3ccccc3)C3(O)CC1CCC23C	1.21507
382	Cc1c(C)c(Nc2ccc(I)cc2)c(C)c(C)c1Nc1ccc(I)cc1	1.78025
383	Cc1c(C2=CCCc3ccccc32)c2ccccc2n1C	1.23692
384	CC1C(c2ccccc2)OCc2cc(Cl)ccc2-c2ccc(Cl)cc2CN1C	1.27485
385	Cc1cc(CO)c2c(c1)COC(C)(C)O2	1.23767
386	CC1CC(O[Si](C)(C)C(C)(C)C)CC2C1C(=O)CC1C(C)(C)C(O)CCC21C	1.08222
387	CC1CC=CC(=O)OC(C)CC(=O)OC(C)C(O)C=CC(=O)O1	1.2354
388	CC1CCC(C(C)CO)C(O)C1	1.09379
389	Cc1ccc(-c2cc(C(F)(F)F)n3nc(C)cc3n2)cc1	1.43196
390	Cc1ccc(-n2c(-c3ccccn3)nnc2-c2ccccn2)cc1C	1.28164
391	Cc1ccc(NC(=O)c2ccccc2-c2ccccn2)cc1	1.23313
392	Cc1ccc(Nc2c(-c3ccc(Br)cc3)nc3c(c(C)nn3C)c2C(=O)c2ccc(Br)cc2)cc1	1.52978
393	Cc1ccc(OCC(O)CO)cc1	1.20531
394	CC1CCC2(CC1)O[N][C]1NCCN12	1.24639
395	Cc1cccc(C=NO)c1O	1.33086
396	Cc1ccnc(-c2cccc(-c3ccc4ccc5cccc6ccc3c4c56)c2)c1	1.33718
397	Cc1ccnc(-c2cccc(Cl)c2)c1	1.37355
398	CCC(OC(=O)C12CCC(C)(C(=O)O1)C2(C)C)C1C(I)C1(C)C	1.52633
399	CCCCn1c2ccccc2c2cc(C=C(C#N)c3ccc([N+](=O)[O-])cc3)ccc21	1.30383
400	CCN(CC)C(=O)C=C(C)c1ccc2oc(C(=O)c3ccc(C#N)cc3)c(NC(=O)C(C#N)=C(C)O)c2c1	1.31274
401	CCOC(=O)C=CC(CC(C)C)NC(=O)OC(C)(C)C	1.08527
402	CCOC(=O)C1(C(=O)OCC)NC(c2cccc(Cl)c2Cl)C2C(=O)c3ccccc3C(=O)C21	1.37572
403	CCOC(=O)C1C(=O)OC(C)(C)C1CC(=O)c1ccc(Br)cc1	1.48557
404	CCOC(=O)C1C(CCC(=O)OC)CC(=Cc2ccccn2)N1c1ccc(OC)cc1	1.21228
405	CCOC(=O)C1NC2COC(C)(C)OC2c2c(O)c(C)c3c(c21)OCO3	1.34072
406	CCOC(=O)COc1cccc2ccc(C=Nc3ccccc3O)nc12	1.3561
407	CCOc1ccccc1N1C(=O)C2C3c4ccccc4C(c4ccccc43)C2C1=O	1.31811
408	CCOP(=O)(OCC)c1cc(-c2ccccc2)[nH]n1	1.23898
409	CCOP(=O)(OCC)N(C(=C=C(c1ccccc1)c1ccccc1)c1ccccc1)c1ccc(C)cc1	1.20553
410	CN(C)[N][C](O[Si](O[C]([N]N(C)C)c1ccccc1)(c1ccccc1)c1ccccc1)c1ccccc1	1.19835
411	CN(C)C(O)=C(C#N)C(=O)Nc1c(F)c(F)c(F)c(F)c1F	1.61502
412	CN(C)c1ccc(C#Cc2c3ccccc3cc3ccccc23)cc1	1.2404
413	CN(C)c1ccc(C#Cc2c3ccccc3nc3ccccc23)cc1	1.25979
414	CN(C)c1ccc(C=CC(=O)c2ccccc2O)cc1	1.2648
415	CN(C)c1ccc(C=CC=O)cc1	1.1694
416	CN(C1CCCCC1)P(=O)(NC(=O)c1c(Cl)cccc1Cl)N(C)C1CCCCC1	1.25769
417	CN(Cc1ccccc1)P(=O)(NC(=O)c1c(Cl)cccc1Cl)N(C)Cc1ccccc1	1.35053
418	CN1C(=O)C(=Cc2ccccc2)c2ccccc21	1.27153
419	CN1C(=O)c2ccc(N(C)C)cc2C1=O	1.33395
420	CN1c2cccc(n2)N(C)c2cccc(n2)N(C)c2cccc(n2)N(C)c2cccc(n2)N(C)c2cccc1n2	1.28664
421	CN1Cc2ccccc2-c2ccccc2COCC1Cc1ccccc1	1.19582
422	CN1CCN(c2c(-c3nnc(-c4ccccc4)o3)cnc3cc(C(F)(F)F)ccc23)CC1	1.37595
423	CO[PH]12[N][PH](OC)([N][PH](c3ccccc3)(c3ccccc3)[N]1)OCCOCCOCCOCCO2	1.3943
424	COC(=O)C(=O)Nc1ccc([N+](=O)[O-])cc1[N+](=O)[O-]	1.65942
425	COC(=O)C1(c2ccc(Cl)cc2)NC(c2ccc([N+](=O)[O-])cc2)c2c(OC(C)=O)ccc(OC(C)=O)c21	1.38783
426	COC(=O)C12CCC(C3COC(C)(C)O3)=C(C)C1COC2=O	1.29308
427	COC(=O)c1cc(O[PH]2(Oc3cc(C(=O)OC)cc(C(=O)OC)c3)[N][PH](c3ccccc3)(c3ccccc3)[N][PH](c3ccccc3)(c3ccccc3)[N]2)cc(C(=O)OC)c1	1.21333
428	COC(=O)c1cc(O[PH]2(Oc3cc(C(=O)OC)cc(C(=O)OC)c3)[N][PH](Oc3cc(C(=O)OC)cc(C(=O)OC)c3)(Oc3cc(C(=O)OC)cc(C(=O)OC)c3)[N][PH](c3ccccc3)(c3ccccc3)[N]2)cc(C(=O)OC)c1	1.39032
429	COC(=O)c1ccc(O[PH]2(Oc3ccc(C(=O)OC)cc3)[N][PH](c3ccccc3)(c3ccccc3)[N][PH](c3ccccc3)(c3ccccc3)[N]2)cc1	1.33828
430	COC(=O)c1cccc(O[PH]2(Oc3cccc(C(=O)OC)c3)[N][PH](c3ccccc3)(c3ccccc3)[N][PH](c3ccccc3)(c3ccccc3)[N]2)c1	1.33801
431	COC(=O)CC(C(=O)N1C(=O)OCC1C(C)C)C(O)c1ccc(OC)c(OC)c1	1.28679
432	COC(=O)CCC1CCC(=O)N2C(Cc3c[nH]c4ccccc34)COC12	1.2319
433	COC(=O)CCNC(=O)C(C)(C)NC(=O)C(NC(=O)C(C)(C)NC(=O)OC(C)(C)C)C(C)C	1.14957
434	COc1cc(OC)c2c(c1)C(=O)c1cc3c(c(O)c1C2=O)C1CCOC1O3	1.51365
435	COC1CC2CC(C3(C)C(C)CC(OC(C)=O)C4(COC(C)=O)C3CCCC43CO3)OC2O1	1.28532
436	COc1ccc(C(C(C)=O)=C2C(=O)N(C(C)=O)c3ccccc32)cc1	1.31911
437	COc1ccc(-c2c3c(nc4onc(C)c24)COC3=O)cc1	1.4789
438	COc1ccc2c(C3CCc4ccc(Cl)cc43)ncnc2c1OC	1.31688
439	COc1ccc2cc(C)c3c(c2c1)c1ccccc1n3C	1.2992
440	COc1cccc(C(C)N2C(=O)C3CCCN3C(=O)OCC=CCOC(=O)CNC(=O)C2C(C)C)c1	1.26305
441	COc1cccc(C=NO)c1O	1.41288
442	COc1ccccc1N1C(=O)C2C3c4ccccc4C(c4ccccc43)C2C1=O	1.32455
443	COC1OC2COC(c3ccccc3)OC2C23OC(=O)CC12[C](C)N([O])O3	1.33434
444	COC1OC2COC(c3ccccc3)OC2C23OC(=O)CC12C(C(C)=O)=C(C)O3	1.34419
445	COCC1CCCN1N(P(c1ccccc1)c1ccccc1)P(c1ccccc1)c1ccccc1	1.21984
446	FC(F)(F)c1cc(-c2ccc(-c3ccc4ccc5cccc6ccc3c4c56)cn2)cc(C(F)(F)F)c1	1.50311
447	N#Cc1c(-c2ccc(Br)cc2)cc(-c2ccccn2)nc1-c1c[nH]c2ccccc12	1.48454
448	N#Cc1c(-c2ccc(Cl)cc2Cl)cc(-c2ccccn2)nc1-c1c[nH]c2ccccc12	1.44816
449	N[C]1N=C[N]c2c1ncn2C1OC(CO)C(O)C1O	1.53246
450	O=C([C]1C(=O)N2C=CCC=C2N=C1C(=O)c1ccccc1)c1ccc(Cl)cc1	1.26539
451	O=C(CCC(=O)Nc1ccc(F)cc1)Nc1ccc(F)cc1	1.39675
452	O=C(CCCCC(=O)Nc1ccc(Br)cc1)Nc1ccc(Br)cc1	1.67076
453	O=C(CCCCCCC(=O)Nc1ccc(Br)cc1)Nc1ccc(Br)cc1	1.64094
454	O=C(CCCCCCC(=O)Nc1ccc(Cl)cc1)Nc1ccc(Cl)cc1	1.37041
455	O=C(CCCCCCC(=O)Nc1ccc(F)cc1)Nc1ccc(F)cc1	1.34678
456	O=C(CCCCCCCCC(=O)Nc1ccc(F)cc1)Nc1ccc(F)cc1	1.30701
457	O=C(Nc1ccccc1)N1CCCC1	1.23284
458	O=C(Nc1ccncc1)c1cccc(C(=O)Nc2ccncc2)c1	1.39221
459	O=C(O)C(Cc1ccc(O)cc1)N1Cc2ccccc2C1=O	1.35849
460	O=C(O)c1ccc(NC(=O)c2cccnc2)cc1	1.50025
461	O=C(O)c1ccccc1COc1ccccc1OCc1ccccc1C(=O)O	1.32566
462	O=C(O)Cn1cnnn1	1.55136
463	O=c1c2cc(I)c3cccc4c(=O)c5cc(I)c6cccc1c6c5-c2c34	2.3078
464	O=C1c2cc3ccccc3cc2-c2cccc(O)c21	1.38082
465	O=C1c2ccccc2-c2ccc(N(c3ccccc3)c3ccccc3)c3cccc1c23	1.27417
466	O=C1CCCC(C(F)=Cc2ccc(Br)cc2)C1	1.55482
467	O=C1CCCCC1C(C[N+](=O)[O-])C(Br)=Cc1ccccc1	1.45893
468	O=C1CCCCC1C(C=Cc1ccc(Cl)cc1)C[N+](=O)[O-]	1.27034
469	O=C1CN(Cc2cccnc2)NC(=O)CN(Cc2ccccc2)NC(=O)CN(Cc2cccnc2)NC(=O)CN(Cc2ccccc2)N1	1.31672
470	O=C1COCC2OCCCC2OC(=O)COCC2OCCCC2O1	1.33795
471	O=C1N2CCCC2C(CCl)C1(Cl)Cl	1.53021
472	O=C1NC2(CCCCCC2)Nc2ccccc21	1.22672
473	O=P(Cl)(Cl)c1cccc2cccc(P(=O)(Cl)Cl)c12	1.71624
474	OC(C1CCCCC1)C(O)C1CCCCC1	1.08289
475	Oc1ccccc1CNc1ccc(Cl)cc1	1.34154
476	ON=Cc1cccc(Cl)c1O	1.55368
477	[CH]([N][N][CH]c1c[nH]c2ccccc12)c1c[nH]c2ccccc12	1.30647
478	[CH]([N][N][CH]c1ccccc1OCc1ccccc1)c1ccccc1OCc1ccccc1	1.22525
479	[CH]([N]N=C(c1ccccc1)c1ccccc1)c1c[nH]c2ccccc12	1.22947
480	[CH]([N]n1cnnc1)c1cccc2ccccc12	1.33621
481	[CH](C1=c2ccccc2=C(N2CCOCC2)[N]1)c1ccccc1	1.28172
482	[CH](c1ccccc1)c1oc([CH]c2ccc(N3CCCCC3)cc2)c2ccccc12	1.11572
483	[CH]1C=CN=C2[N]N=NN12	1.55785
484	[CH]1C=CN2c3c1cccc3O[Si]213(CCCCC1)Oc1cccc2c1N3C=C[CH]2	1.31519
485	[CH]1c2cccn2[SiH]23(CCC2)Oc2ccccc2N13	1.26822
486	[CH]1N=C(C2=N[C](c3ccccn3)N[N]2)[N]N1	1.52
487	[CH2][C]1C(=O)C23C(O)CC4C(C)(C)C(=O)CCC4(C)C2CCC1C3O	1.26902
488	[CH2][C]1C(O)C2c3oc(cc3C(=O)OC)C3OC3(C)CC3OC(=O)C4(OC34)C(OC(C)=O)CC12	1.41265
489	[CH2][C]1CCCC(C)(C)C2CC3(C)OC3CC12	1.08546
490	[CH2][CH]C(=O)Oc1c(C)cc([N][N]c2ccc(C)cc2)cc1C	1.1697
491	[CH2][N]Nc1ccc([N+](=O)[O-])cc1[N+](=O)[O-]	1.64899
492	[N-]=[N+]=NC1=Nc2nc(N=[N+]=[N-])nc3nc(N=[N+]=[N-])nc([n+]23)[N-]1	1.823
493	[N-]=[N+]=Nc1c([N+](=O)[O-])c(N=[N+]=[N-])c([N+](=O)[O-])c(N=[N+]=[N-])c1[N+](=O)[O-]	1.836
494	[N-]=[N+]=Nc1nc(N=[N+]=[N-])nc(N=[N+]=[N-])n1	1.736
495	[N-]=[N+]=Nc1nc(N=[N+]=[N-])nc(NNc2nc(N=[N+]=[N-])nc(N=[N+]=[N-])n2)n1	1.649
496	[N-]=[N+]=Nc1nnc(N=[N+]=[N-])nn1	1.719
497	[N-]=[N+]=Nc1nnn[nH]1	1.67
498	[N-]=[N+]=Nc1nnnn1-c1ccccc1	1.515
499	[NH][PH](c1ccccc1)(c1ccccc1)c1ccccc1	1.17071
500	[NH]C1=c2cccnc2=C2[N]C=CC=C12	1.44222
501	[NH]C1=N[C](N)c2ccccc21	1.31145
502	[NH3+]CC[N-][N+](=O)[O-]	1.563
503	[O][C](C=C(O)c1ccccc1)c1ccc(F)cc1	1.33952
504	[O][C](CC(=O)C(F)(F)F)c1cc(F)cc(F)c1	1.69031
505	[O][N]N1CCC1C(=O)O	1.50597
506	[O-][n+]1c(-c2ccccc2)ccc2ccccc21	1.33799
507	[O-][n+]1c(-c2ccccn2)ccc2ccc3ccc4ccc5c6ccccc6c6ccccc6c5c4c3c21	1.37971
508	[O-][n+]1c2ccccc2c(-c2c3ccccc3[n+]([O-])c3ccccc23)c2ccccc21	1.37725
509	[O-][n+]1ccc2ccccc2c1-c1c(Br)cc(Br)c(O)c1Br	2.07898
510	[O-][n+]1ccc2ccccc2c1-c1c(I)ccc2ccccc12	1.68121
511	[O-][n+]1cccc2cc(-c3ccc(N(c4ccccc4)c4ccccc4)cc3)ccc21	1.26191
512	[O-][n+]1ccccc1Nc1cccc(Br)n1	1.74944
513	[O-][n+]1nc2ccc(Br)cc2c2ccccc21	1.80532
514	[O-][n+]1onc2c1c1no[n+]([O-])c1c1no[n+]([O-])c21	1.901
515	[O]C(=O)C(CC(=O)O)N1C=CCC=C1	1.29728
516	[O]C(=O)C1=C(C(=O)O)N(CC(=O)O)CN1CC(=O)O	1.51298
517	[O]C(=O)C1=CCc2cccc(O)c2N1	1.39168
518	[O]C(=O)C1C=CNC=C1C(=O)O	1.40009
519	[O]C1=CCN(CC(=O)O)C=C1	1.30603
520	[O]c1c2cccc1Cc1cccc(c1[O])Cc1cccc(c1[O])Cc1cccc(c1[O])C2	1.24137
521	[O]c1ccc2ccccc2c1[N]Nc1ccccc1	1.31387
522	[O]CCOc1cc(C#Cc2ccccc2)c(OCC[O])cc1C#Cc1ccccc1	1.24564
523	[O]N([C](C(=O)c1ccccc1)c1ccccc1)c1ccccc1	1.27579
524	[O]N([CH]c1ccc(Cl)cc1)c1ccccc1	1.3815
525	[O]N([CH]c1ccc(O)cc1)c1ccccc1	1.24783
526	[O]N([CH]c1ccccc1)C1C(CO)COC1Cc1ccccc1	1.24013
527	[O]N([CH]c1ccccc1)c1ccc(F)cc1	1.38204
528	[O]N([CH]c1ccccc1Cl)c1ccccc1	1.42153
529	[O]N([CH]c1ccccc1O)c1cccc(Cl)c1	1.4817
530	[O]N([CH]C1COC2(CCCCC2)O1)Cc1ccccc1	1.25012
531	[O]N([N]c1ccc(O)cc1)c1ccccc1	1.3713
532	[O]N([N]c1ccccc1)c1ccccc1C(=O)c1ccccc1C(F)(F)F	1.41175
533	[O]N([N]c1nonc1N1CCOCC1)c1nonc1N1CCOCC1	1.52863
534	[O]N(c1ccccn1)N([O])c1ccccn1	1.45735
535	[O]N1[C](c2c(Cl)cccc2Cl)N([O])c2ccccc21	1.53998
536	[O]N1[C](c2c(F)c(F)c(F)c(F)c2F)N([O])c2ccccc21	1.7455
537	[O]N1[C](c2c(F)cccc2Cl)N([O])C2=C1[CH]C=C[CH]2	1.53228
538	[O]N1[CH]c2[nH]c3ccccc3c2N(c2ccccc2)C(=O)C1	1.39334
539	[O]N1C=C[CH]C=C1CP(=O)(O)O	1.66456
540	BrC(Br)c1ccccc1C(Br)Br	2.56614
541	BrC1(Br)CC12CC1(CC1(Br)Br)CC1(CC1(Br)Br)CC1(CC1(Br)Br)C2	2.62
542	BrC1(c2ccccc2)C2CCC1CC2	1.50732
543	BrC1=C(Br)C2CC1C(Br)C2Br	2.71799
544	BrC1=C(C23CC4CC(CC(C4)C2)C3)N[N]C1	1.45398
545	BrC12CC3(Br)CC(Br)(C1)CC(Br)(C2)C3	2.32163
546	Brc1c(Br)c(Br)c(Oc2ccccc2)c(Br)c1Br	2.55868
547	BrC1C(Br)C2C3C(Br)C(Br)C4CC5CC1C2C5C43	2.22413
548	Brc1c(CN2CCCCC2)cccc1CN1CCCCC1	1.32571
549	Brc1c(Cn2cccn2)cccc1Cn1cccn1	1.5227
550	Brc1c(CN2CCOCC2)cccc1CN1CCOCC1	1.42873
551	Brc1c(I)cncc1I	3.25882
552	Brc1c2c(c(Br)c3ccccc13)C(Br)C(Br)C(Br)C2Br	2.60756
553	Brc1c2ccccc2c(-c2c3ccccc3c(Br)c3ccccc23)c2ccccc12	1.662
554	Brc1c2ccccc2cc2cc3ccccc3cc12	1.5933
555	Brc1cc(Br)c(Oc2ccccc2)c(Br)c1	2.10156
556	Brc1cc(Br)c2ncccc2c1	2.12415
557	Brc1cc(-c2ccccc2)c2ccccc2c1CCc1ccccc1	1.40592
558	Brc1cc(-c2ccccc2)cc(-c2ccccc2)c1	1.48881
559	Brc1cc2cc(Br)c(OCCNc3ccccc3)cc2cc1OCCNc1ccccc1	1.56465
560	Brc1cc2cc3c(cc2cc1Br)C1CCC3C1	1.82462
561	Brc1cc2nc(-c3ccccc3)nc-2n(Cc2ccccc2)c1	1.52527
562	Brc1ccc([N][N]Nc2ccc(Br)cc2Br)c(Br)c1	2.28538
563	BrC1CCC(Br)C2CCC1O2	2.01168
564	Brc1ccc(C=C2c3ccccc3C=Cc3ccccc32)cc1	1.424
565	Brc1ccc(C=Cc2ccc(-n3c4ccccc4c4ccccc43)cc2)cc1	1.38074
566	Brc1ccc(C2=C(c3ccccc3)CCCO2)cc1	1.49805
567	Brc1ccc(C2C(c3ccncc3)C(c3ccc(Br)cc3)C2c2ccncc2)cc1	1.53906
568	Brc1ccc(-c2cc(-c3ccccc3)nc(-c3ccccc3)c2)cc1	1.42906
569	Brc1ccc(-c2ccccc2)c(-c2ccccc2)c1	1.43729
570	Brc1ccc(-c2ccnc(-c3ccccc3)c2)cc1	1.4701
571	Brc1ccc(-c2cnc3ccccc3c2)cc1	1.62153
572	Brc1ccc(-c2nc3ccc4ccccc4c3c3c2CCCC3)cc1	1.47335
573	Brc1ccc(-c2nc3ccccc3[nH]2)cc1	1.63815
574	Brc1ccc(-c2nc3ccccc3n2-c2ccc(Br)cc2)cc1	1.7043
575	Brc1ccc(-c2nc3ccccc3nc2-c2ccc(Br)cc2)cc1	1.69373
576	Brc1ccc(-c2ncc3ccc(Br)cn23)nc1	2.0415
577	Brc1ccc(-c2nnc(C34CC5CC(CC(C5)C3)C4)o2)cc1	1.55269
578	Brc1ccc(Cn2c(-c3ccc(Br)cc3)nc3ccccc32)cc1	1.66358
579	Brc1ccc(Cn2c3ccc(Br)cc3c3cc(Br)ccc32)cc1	1.9831
580	Brc1ccc(Cn2cc(-c3nc4ccccn4c3Cc3ccccc3)nn2)cc1	1.44007
581	Brc1ccc(-n2c(-c3ccccn3)nnc2-c2ccccn2)cc1	1.53308
582	Brc1ccc(NC2CC3CCC2C3)cc1	1.46818
583	Brc1ccc(NCc2ccc3c(c2)OCO3)cc1	1.625
584	Brc1ccc(Oc2c(Br)c(Br)c(Br)c(Br)c2Br)cc1	2.77755
585	Brc1ccc(Oc2c(Br)cccc2Br)c(Br)c1	2.31085
586	Brc1ccc(Oc2c(Br)cccc2Br)cc1	2.06574
587	Brc1ccc(Oc2ccc(Br)cc2)cc1	1.84613
588	Brc1ccc(Oc2ccc(Br)cc2Br)c(Br)c1	2.32291
589	Brc1ccc(Oc2ccc(Br)cc2Br)cc1	2.07613
590	BrC1CCC=CCCC(Br)C(Br)CCC1Br	2.08793
591	Brc1ccc2[nH]c3ccc(Br)cc3c2c1	2.03913
592	Brc1ccc2[nH]c3ccccc3c2c1	1.71267
593	Brc1ccc2c(c1)C=CC(c1ccccc1)(c1ccccc1)O2	1.47098
594	Brc1ccc2c(c1)C1(c3ccccc3-2)c2ccccc2-c2ccc(Br)cc21	1.62577
595	Brc1ccc2c(c1)C1(CCCC1)c1cc(Br)ccc1-2	1.73831
596	Brc1ccc2c(c1)-c1cc(Br)ccc1C21c2ccc(Br)cc2-c2cc(Br)ccc21	1.82076
597	Brc1ccc2c(c1)c1cc(Br)ccc1n2Cc1cccnc1	1.75966
598	Brc1ccc2c(c1)c1cc(Br)ccc1n2Cc1ccncc1	1.76464
599	Brc1ccc2c(c1)-c1cc(Br)ccc1OC1(CCCCC1)O2	1.69916
600	Brc1ccc2c(c1)C1CC(c3ccccc3)(Oc3ccccc31)O2	1.50728
601	Brc1ccc2c(c1)-c1nc3c(ccc4ccc(Br)cc43)cc1CC2	1.76294
602	Brc1ccc2c(c1)Cc1cc(C(=C(c3ccccc3)c3ccc4c(c3)Cc3cc(Br)ccc3-4)c3ccccc3)ccc1-2	1.50211
603	Brc1ccc2c(c1)Cc1cc3c(cc1-2)CN1CN3Cc2cc3c(cc21)Cc1cc(Br)ccc1-3	1.60885
604	Brc1ccc2c(c1)CCCc1cc(Br)ccc1OCO2	1.80164
605	Brc1ccc2c(c1)CN(Cc1ccccc1)CO2	1.51674
606	Brc1ccc2c(c1)COCc1cc(Br)ccc1-2	1.89239
607	Brc1ccc2cc(-c3ccc(-n4c5ccccc5c5ccccc54)cc3)cc(-c3ccccc3)c2c1	1.4093
608	Brc1cccc(Br)c1	2.25603
609	Brc1cccc(Br)c1-c1c(Br)cccc1Br	2.32573
610	Brc1cccc(-c2nc3ccccc3nc2-c2cccc(Br)c2)c1	1.74691
611	Brc1cccc(Nc2ccccn2)n1	1.70245
612	Brc1cccc2c1-c1c(Br)cccc1-c1cccc(Br)c1-c1c(Br)cccc1-2	1.9261
613	Brc1ccccc1[CH][N][N][CH]c1ccccc1Br	1.84388
614	Brc1ccccc1Br	2.21949
615	Brc1ccccc1-c1ccc(-c2ccccc2)cc1	1.45607
616	Brc1ccccc1-c1ccccc1Br	1.82441
617	Brc1ccccc1P(c1ccccc1)c1ccccc1	1.46693
618	Brc1cnc(I)nc1	2.81386
619	Brc1cnc2c(Br)cc(Br)cc2c1	2.47215
620	Brc1nc[nH]n1	2.24856
621	BrCBr	3.1363
622	BrCC12OCCOC1(CBr)OCCO2	2.05206
623	BrCc1c(-c2ccccc2)ccc(-c2ccccc2)c1CBr	1.64685
624	BrCc1cc(Br)c(Br)cc1CBr	2.56917
625	BrCc1cc(CBr)c(CBr)cc1CBr	2.39547
626	BrCc1cc(OCc2ccccc2)cc(OCc2ccccc2)c1	1.43034
627	BrCc1cc2c(CBr)cc1CCc1cc(CBr)c(cc1CBr)CC2	1.98199
628	BrCc1cc2ccccc2c2c1OCCOc1c(CBr)cc3ccccc3c1C2	1.64774
629	BrCc1ccc(CBr)cc1	2.0114
630	BrCc1ccc(O[PH]2(Oc3ccc(CBr)cc3)[N][PH](Oc3ccc(CBr)cc3)(Oc3ccc(CBr)cc3)[N][PH]3([N]2)Oc2ccccc2-c2ccccc2O3)cc1	1.52928
631	BrCc1cccc(CBr)c1	1.94812
632	BrCc1cccc(CBr)n1	2.05562
633	BrCCCOc1ccc2ccccc2c1	1.50759
634	BrCCn1c2ccccc2c2ccccc21	1.5706
635	BrCCn1nnc(-c2cccc(-c3nnn(CCBr)n3)c2)n1	1.78191
636	BrCCOc1cccc2c1OCCO2	1.70147
637	C#CC(=Cc1ccccc1)C(=O)OC	1.25412
638	C#CC(=O)N1C(C)C(=O)OCC1c1ccccc1	1.4039
639	C#CC(=O)N1CC(=O)OCC1c1ccccc1	1.33046
640	C#CC(C)(C)NC(=O)c1cc(Cl)cc(Cl)c1	1.33962
641	C#CC(C)(CCC(C)(C#C)O[Si](C)(C)C(C)(C)C)O[Si](C)(C)C(C)(C)C	0.973937
642	C#CC(C)(O)C(=O)N1c2ccccc2CC1COC	1.22897
643	C#CC(CC)(CC)NC(=O)C(Cc1ccccc1)NC(=O)OC(C)(C)C	1.08533
644	C#CC=CCC1CCCC2(CCCC(O)C2C=CC#C)N1	1.12138
645	C#CC1(O)C=CC(O)(C#C)C=C1	1.15691
646	C#CC1(O)CCC2C3CCC4c5nonc5CCC4(C)C3CCC21C	1.23752
647	C#CC1(O)CCC2C3CCc4cc(OC)ccc4C3=CCC21C	1.21511
648	C#CC1(OC(=O)c2cc([N+](=O)[O-])cc([N+](=O)[O-])c2)C(=O)OCC1(C)CCOCc1ccccc1	1.39786
649	C#CC1(OC)CCC(C#C)(OC)CC1	1.17216
650	C#CC1(OC)CCC2C3CCc4cc(OC)ccc4C3CCC21C	1.19538
651	C#CC12CCC(=O)N3CCC45c6ccc(OC)cc6N(C)C4C(C(=O)OC)(C1)OC325	1.34551
652	C#Cc1cc(Cl)ccc1C1CC(=O)CC2C(=O)N(C)C(=O)C21	1.41202
653	C#Cc1cc(O)cc(C(=O)OCC)c1	1.2754
654	C#Cc1cc(OC)c(-n2cc(-c3ccccc3OCC(C)C)nn2)cc1OC	1.23663
655	C#CC1CC2(C)C(CCC3(C)C2CCCC32OCCO2)O1	1.191
656	C#Cc1ccc([C]([NH])OC)cc1	1.30534
657	C#Cc1ccc([N][N]c2ccc(C#C)cc2)cc1	1.27841
658	C#Cc1ccc(C(c2ccc(C#C)cc2)(c2ccc(C#C)cc2)c2ccc(C#C)cc2)cc1	1.14433
659	C#Cc1ccc(-n2c3ccccc3c3ccccc32)cc1	1.22705
660	C#Cc1ccc(NC(=O)N(C)C(=O)NC)cc1	1.28417
661	C#Cc1ccc(NC(=O)Nc2ccc([N+](=O)[O-])cc2)cc1	1.41195
662	C#Cc1ccc(OCC(COc2ccc(C#C)cc2)(COc2ccc(C#C)cc2)COc2ccc(C#C)cc2)cc1	1.16486
663	C#Cc1ccc2c(c1)C1c3ccccc3C2c2cc(C#C)ccc21	1.21314
664	C#Cc1cccc(N=C2N(C(C)C)C(=O)C(=O)N2C(C)C)c1	1.254
665	C#Cc1cccc(OCC(COc2cccc(C#C)c2)(COc2cccc(C#C)c2)COc2cccc(C#C)c2)c1	1.13188
666	C#Cc1ccccc1	1.13827
667	C#CCC1(Cc2cn(Cc3ccccc3O)nn2)C(=O)N(Cc2ccccc2)c2c(Cl)cccc21	1.27639
668	C#CCC1C(=O)N(C)c2ccccc2N(C)C1=O	1.30877
669	C#CCc1c(C)nn(C(=O)c2ccco2)c1C	1.2813
670	C#CCN1C(=O)[C]([CH]N(C)C)C(c2ccccc2)=Nc2ccccc21	1.24258
671	C#CCn1c(=O)[nH]c2cc([N+](=O)[O-])ccc21	1.46185
672	C#CCn1c(=O)[nH]c2ccccc21	1.29928
673	C#CCN1C(=O)C(CC#C)(CC#C)C(C)=Nn2cnnc21	1.33212
674	C#CCN1C(=O)CC(=O)N(CC#C)c2cc(Cl)ccc21	1.41677
675	C#CCN1C(=O)COc2cc(F)c(NC(=O)C(C)(C)CCl)cc21	1.40214
676	C#CCn1c(=O)n(C=C=C)c2cc(Br)cnc21	1.59961
677	C#CCn1c(=O)n(CC#C)c2c3c(ccc21)C(=O)c1ccccc1C3=O	1.4047
678	C#CCn1c(=O)n(CC#C)c2ncc(Br)cc21	1.64967
679	C#CCn1c(N)nc2ccccc21	1.2917
680	C#CCn1cc(C=O)c(=O)[nH]c1=O	1.45012
681	C#CCN1CCC(=O)N(CC#C)CCC(=O)N(CC#C)CCC(=O)N(CC#C)CCC1=O	1.10432
682	C#CCn1cnc2c(Cl)nc(Cl)nc21	1.63151
683	C#CCn1nc(Br)c2ccc([N+](=O)[O-])cc21	1.78204
684	C#CCn1nc(-c2ccc(C)cc2)c2ccccc2c1=O	1.26503
685	C#CCNC(=O)C12CC3CC(CC(C3)C1)C2	1.20166
686	C#CCOC(=O)c1cc(C(=O)OCC#C)cc([N+](=O)[O-])c1	1.48107
687	C#CCOC(=O)c1ccccc1O	1.35042
688	C#CCOC(=O)Oc1c(F)c(F)c(F)c(F)c1F	1.73684
689	C#CCOC(c1ccc(C)o1)C(OCC#C)c1ccc(C)o1	1.24072
690	C#CCOc1c(OC)ccc2c1C(=O)OC2C1c2c(cc3c(c2OC)OCO3)CCN1C	1.33311
691	C#CCOc1cc(N2C(=O)C3=C(CCCC3)C2=O)c(F)cc1Cl	1.41421
692	C#CCOc1cc2ccccc2cc1OCC#C	1.26434
693	C#CCOc1ccc(=O)n(CC#C)n1	1.29544
694	C#CCOc1ccc(C(=O)C=Cc2cc(OC)c(OC)c(OC)c2)cc1	1.2626
695	C#CCOc1ccc(C(C)=O)c(O)c1	1.29541
696	C#CCOc1ccc(C(C)=O)cc1OC	1.25595
697	C#CCOc1ccc(C=O)c(O)c1	1.34536
698	C#CCOc1ccc2c(OCC#C)cccc2c1	1.25964
699	C#CCOc1ccc2cc(OCC#C)ccc2c1	1.22878
700	C#CCOc1ccc2ccc(OCC#C)cc2c1	1.26073
701	C#CCOc1ccc2ccccc2c1-c1c(OCC#C)ccc2ccccc12	1.29142
702	C#CCOc1cccc(OCc2cc(-c3c4ccccc4c(Cl)c4ccccc34)no2)c1	1.24506
703	C#CCOc1ccccc1C(n1cccn1)n1cccn1	1.33577
704	C#CCOc1ccccc1C=O	1.2969
705	C#CCOC1OC(COCc2ccccc2)C(OCc2ccccc2)C(OCc2ccccc2)C1(CCC(=O)OC)[N+](=O)[O-]	1.26692
706	C#CCOCc1cc2cc(c1)OCCOCCOCCOCCOc1cc(COCC#C)cc(c1)OCCOCCOCCOCCO2	1.26307
707	C#CCON1C(=O)c2ccccc2C1=O	1.40248
708	C#Cn1ccnc1C#Cc1ccc(OC)cc1	1.26074
709	C(#C[Si]1(C#Cc2ccccc2)C(c2ccccc2)=C(c2ccccc2)C(c2ccccc2)=C1c1ccccc1)c1ccccc1	1.20118
710	C(#CC(c1ccccc1)(c1ccccc1)c1ccccc1)c1c2ccccc2c(C#CC(c2ccccc2)(c2ccccc2)c2ccccc2)c2ccccc12	1.19069
711	C(#CC(c1ccccc1)(c1ccccc1)c1ccccc1)c1ccc(C#CC(c2ccccc2)(c2ccccc2)c2ccccc2)nn1	1.19979
712	C(#CC12CC3CC(CC(C3)C1)C2)c1ccccc1	1.15616
713	C(#Cc1c2ccccc2c(C#Cc2ccccc2)c2ccccc12)c1ccccc1	1.22885
714	C(#Cc1ccc(Oc2ccc(C#Cc3ccccc3)c(C#Cc3ccccc3)c2)cc1C#Cc1ccccc1)c1ccccc1	1.21142
715	C(#Cc1ccc[nH]1)c1ccc2ccc(C#Cc3ccc[nH]3)nc2n1	1.27448
716	C(#Cc1ccccc1)C(=Cc1ccccc1)[Si](c1ccccc1)(c1ccccc1)c1ccccc1	1.16515
717	C(#Cc1ccccc1)C=C(C#Cc1ccccc1)c1ccccc1	1.14588
718	C(#Cc1ccccc1)CN(c1ccccc1)c1ccccc1	1.15476
719	C(=C(C(=C(C(=C(C(=Cc1ccccc1)c1ccccc1)c1ccccc1)c1ccccc1)c1ccccc1)c1ccccc1)c1ccccc1)c1ccccc1	1.1479
720	C(=C(C(=Cc1ccccn1)c1ccccc1)c1ccccc1)c1ccccn1	1.2444
721	C(=C(c1ccccc1)c1c(-c2ccccc2)[nH]c2ccccc12)c1ccccc1	1.20669
722	C(=C(c1ccccc1)c1ccccc1)c1ccc(-c2ccc(C=C(c3ccccc3)c3ccccc3)cc2)cc1	1.19533
723	C(=C(c1ccccc1)c1ccccc1-n1nnc2ccccc21)c1ccccc1	1.27646
724	C(=C(c1ccccc1)c1cn(Cc2ccccc2)c2ccccc12)c1ccccc1	1.20965
725	C(=C(c1ccccc1)P(c1ccccc1)c1ccccc1)c1ccccc1	1.21141
726	C(=C(Oc1ccc(OC(=Cc2ccccc2)c2ccccc2)cc1)c1ccccc1)c1ccccc1	1.25338
727	C(=C[Si](c1ccccc1)(c1ccccc1)c1ccccc1)[SiH](c1ccccc1)c1ccccc1	1.14572
728	C(=C1CC(=Cc2ccccc2)C1)c1ccccc1	1.23939
729	C(=Cc1c2ccccc2c(C=Cc2ccccc2)c2ccccc12)c1ccccc1	1.23276
730	C(=Cc1ccc(-c2cn(-c3ccncc3)nn2)cc1)c1ccncc1	1.38438
731	C(=Cc1ccc(-c2cn(Cc3ccncc3)nn2)cc1)c1ccncc1	1.33127
732	C(=Cc1ccc(CN(c2ccccc2)c2ccccc2)cc1)c1ccccc1	1.18397
733	C(=Cc1ccc(CN(c2ccccn2)c2ccccn2)cc1)c1ccccc1	1.24618
734	C(=Cc1ccc(N(c2ccccc2)c2ccccc2)cc1)c1ccc(N(c2ccccc2)c2ccccc2)cc1	1.20523
735	C(=Cc1ccc(N(c2ccccc2)c2ccccc2)cc1)c1ccc(N=Cc2ccncc2)cc1	1.2333
736	C(=Cc1ccc(-n2cncn2)cc1)c1ccc(-c2cc(-c3ccccn3)nc(-c3ccccn3)c2)cc1	1.34868
737	C(=Cc1ccc2cc[nH]c2c1)c1ccccc1	1.21755
738	C(=Cc1cccc(-c2ccccn2)c1)c1ccc(N(c2ccccc2)c2ccccc2)cc1	1.2436
739	C(=Cc1cccc2ccccc12)c1ccc(N(c2ccccc2)c2ccccc2)cc1	1.22147
740	C(=Cc1ccncc1)c1ccccc1	1.18453
741	C(=Cc1cnccn1)c1ccccc1	1.2406
742	C(=CCn1cnc2ccccc21)Cn1cnc2ccccc21	1.15526
743	C(=CN(C=Cc1ccccc1)c1ccccc1)c1ccccc1	1.1982
744	C(=NC(N=Cc1cccnc1)c1cccnc1)c1cccnc1	1.29187
745	C(=NC12CC3CC(CC(C3)C1)C2)c1ccccc1	1.15691
746	C(=Nc1ccc(N=Cc2ccc[nH]2)cc1)c1ccc[nH]1	1.23114
747	C(=Nc1ccc(N=Cc2ccncc2)cc1)c1ccncc1	1.28631
748	C(=Nc1ccc2[nH]ncc2c1)c1cnc2ccccc2n1	1.43345
749	C(=Nc1ccc2ccccc2c1-c1c(N=Cc2ccco2)ccc2ccccc12)c1ccco1	1.28953
750	C(=Nc1cccc(N=Cc2ccc[nH]2)c1)c1ccc[nH]1	1.25867
751	C(=Nc1cccc2c(N=Cc3ccc4ccccc4n3)cccc12)c1ccc2ccccc2n1	1.32517
752	C(=Nc1ccccc1)c1ccc(C=Nc2ccccc2)o1	1.28108
753	C(=Nc1ccccc1)c1cccc(C=Nc2ccccc2)c1	1.17473
754	C(=Nc1ccccc1N=Cc1ccc[nH]1)c1ccc[nH]1	1.21996
755	C(=Nc1ccccn1)c1ccc(C=Nc2ccccn2)cc1	1.31446
756	C(=NCc1ccc(CN=Cc2cccnc2)cc1)c1cccnc1	1.2383
757	C(=NCCC1=CCc2ccccc21)c1ncc[nH]1	1.238
758	C(=NCCCCN=Cc1ccccn1)c1ccccn1	1.19521
759	C(=NCCCN=Cc1cnc2ccccc2n1)c1cnc2ccccc2n1	1.29472
760	C(=NCCCP(c1ccccc1)c1ccccc1)c1ccccc1	1.20866
761	C(=NCCN(CCN=Cc1ccc[nH]1)CCN=Cc1ccc[nH]1)c1ccc[nH]1	1.18127
762	C(=NCCN=Cc1cnc2ccccc2n1)c1cnc2ccccc2n1	1.34437
763	C(=NCCN1CCN(CCN=Cc2cnn(-c3ccccc3)n2)C1c1cnn(-c2ccccc2)n1)c1cnn(-c2ccccc2)n1	1.26282
764	C(=Nn1cnnc1)c1ccccc1	1.32637
765	C(=NNc1ccccc1)c1ccccn1	1.21848
766	C(=NNc1ccccn1)c1cccnc1	1.32414
767	C(C#CC12CCC(C#Cc3ccncc3)(CC1)CC2)#CC12CCC(C#Cc3ccncc3)(CC1)CC2	1.14192
768	C(C#Cc1ccc(N(c2ccncc2)c2ccncc2)cc1)#Cc1ccc(N(c2ccncc2)c2ccncc2)cc1	1.21705
769	C(C#Cc1cncc2ccccc12)#Cc1cncc2ccccc12	1.3393
770	C(C=C(c1ccccc1)c1ccccc1)=Nc1cccc2ccccc12	1.20175
771	C(C=Cc1ccccc1C=CC=Cc1ccccc1)=Cc1ccccc1	1.11113
772	C(CN(c1ccccc1)c1ccccc1)=C1C=C(CN(c2ccccc2)c2ccccc2)CC1	1.17858
773	C[C]([N][N][C](C)c1cccc([N+](=O)[O-])c1)c1cccc([N+](=O)[O-])c1	1.40583
774	C[C]([N][N][C](C)c1cccc(Cl)c1)c1cccc(Cl)c1	1.35872
775	C[C]([N][N][C](C)c1cnccn1)c1cnccn1	1.33788
776	C[C]([N]N=C(C)c1ccccn1)c1ccccn1	1.21344
777	C[C]([N]Nc1ccc([N+](=O)[O-])cc1[N+](=O)[O-])C(C)=NO	1.50231
778	C[C]([N]OC(=O)C1(C)CCCC2(C)c3ccc(C(C)C)cc3CCC12)c1ccc(Cl)cc1	1.21016
779	C[C]([N]Oc1ccc([N+](=O)[O-])cc1)c1ccccc1	1.36391
780	C[C]([N]Oc1nc(F)c(F)c(F)c1F)c1ccccc1	1.56736
781	C[C]([O])C(=C(C)O)c1oc(C)c(C(C(C)=O)=C(C)O)c1C	1.22473
782	C[C]([O])CC1(O)C(=O)C2=C(OCC2C)c2ccc3c(C)cccc3c21	1.32114
783	C[C](C)[C]1[C]([C](c2c(C)n(C)c3ccccc23)C(F)(F)C(F)(F)C(F)(F)F)C(=O)OC1=O	1.52439
784	C[C](C)[C]1C(=O)OC(=O)C1=C(c1c(C)n(C)c2ccccc12)C(F)(F)C(F)(F)F	1.47015
785	C[C](CCC(=O)O)[N]NC(=O)c1ccccc1O	1.39271
786	C[C](N[O])C1CC(C)COC12OC1CC3C4CCC5CC(OC(C)=O)CCC5(C)C4CCC3(C)C1C2C	1.16064
787	C[C]1[C](C(C)(C)C)c2ccccc2N(c2ccccc2)C1=O	1.22823
788	C[C]1[CH]C(C(OC(C)=O)C(C)C2C3C4(O)OC5(CCC23C)C(CCC2C(C)(C)OC3CC(=O)OC32C5O)C4=O)OC1=O	1.27375
789	C[C]1[CH]CC2(C)CC(=O)C(=C(C)C)C2CCC(C)C(=O)CC1	1.09326
790	C[C]1[CH]CC2C(C)=CC3C(O)C(C)C(O)C3C2C=C2C(=O)OC(CC1)C(C)C2=O	1.26526
791	C[C]1[CH]CCC2(C)OC2C(=O)c2c(C)coc2C1	1.27046
792	C[C]1[CH]CCC2(C)OC2C2OC(=O)C(CN3CCCC3)C2CC1O	1.23472
793	C[C]1[N]N(C(=O)Nc2c(C(C)C)cccc2C(C)C)[C](C)[N]N1C(=O)Nc1c(C(C)C)cccc1C(C)C	1.1422
794	C[C]1[N]N(C(=O)Nc2ccccn2)C(C)=NN1C(=O)Nc1ccccn1	1.3845
795	C[C]1C=C(C)N=C2N=C[N]N12	1.3096
796	C[C]1CC(c2ccco2)N(c2ccc([N+](=O)[O-])cc2)[N]1	1.35991
797	C[C]1CC2c3ccccc3OC(=O)N2[N]1	1.33186
798	C[C]1N([O])N(c2ccccc2C)C(=O)C12CCCC2	1.24067
799	C[CH][N]Nc1ccc([N+](=O)[O-])cc1	1.34475
800	C[N]c1oc([C](I)c2ccccc2)c2ccccc12	1.74088
801	C[N+](=O)[O-]	1.422
802	C[PH]1(c2ccccc2)[N][PH](C)(c2ccccc2)[N][PH](C)(c2ccccc2)[N]1	1.14655
803	C[PH]1(c2ccccc2)[N][PH](C)(c2ccccc2)[N][PH](CBr)(c2ccccc2)[N]1	1.43035
804	C[PH]1(c2ccccc2)[N][PH](CBr)(c2ccccc2)[N][PH](CBr)(c2ccccc2)[N]1	1.59617
805	C[Si](C#Cc1ccccc1)(C#Cc1ccccc1)c1cccc2ccc3cccnc3c12	1.22749
806	C[Si](C)(C)[C](I)[C]1OC(c2ccc([N+](=O)[O-])cc2)=Nc2ccccc21	1.64791
807	C[Si](C)(C)[Si](C)([Si](C)(C)C)[Si](C)(C)[Si](C)([Si](C)(C)[Si](C)([Si](C)(C)C)[Si](C)(C)C)[Si](C)([Si](C)(C)[Si](C)([Si](C)(C)C)[Si](C)(C)C)[Si](C)(C)[Si](C)([Si](C)(C)C)[Si](C)(C)C	0.967325
808	C[Si](C)(C)[Si]1([Si](C)(C)C)[Si](C)(C)[Si](C)(C)[Si]([Si](C)(C)C)([Si](C)(C)C)[Si]1(Br)Br	1.2408
809	C[Si](C)(C)[Si]1([Si](C)(C)C)[Si](C)(C)[Si](C)(C)[Si]([Si](C)(C)C)([Si](C)(C)C)[Si]1(Cl)Cl	1.08266
810	C[Si](C)(C)C	0.94631
811	C[Si](C)(C)C#C[Si](C#C[Si](C)(C)C)(c1ccccc1)c1ccccc1	1.06781
812	C[Si](C)(C)C#C[Si](C)(C#C[Si](C)(C)C)c1ccccc1	0.982192
813	C[Si](C)(C)C#CC(=CCCn1nnc2ccccc21)c1ccccc1	1.16214
814	C[Si](C)(C)C#CC1=CC2=C3C=CC=C4[C]3C(=C3C=CC=C1[C]32)C=C4C#C[Si](C)(C)C	1.12474
815	C[Si](C)(C)C#Cc1ccc([N]c2c(Cl)c(Cl)c([N]c3ccc(C#C[Si](C)(C)C)cc3)c(Cl)c2Cl)cc1	1.30095
816	C[Si](C)(C)C#Cc1ccc([N+](=O)[O-])cc1	1.15318
817	C[Si](C)(C)C#Cc1ccc(Nc2c3ccccc3c(Nc3ccc(C#C[Si](C)(C)C)cc3)c3ccccc23)cc1	1.14349
818	C[Si](C)(C)C#Cc1ccc(Nc2ccc(Nc3ccc(C#C[Si](C)(C)C)cc3)cc2)cc1	1.1141
819	C[Si](C)(C)C#Cc1ccccc1[N]c1cc(Nc2ccccc2C#C[Si](C)(C)C)c([N]c2ccccc2C#C[Si](C)(C)C)cc1Nc1ccccc1C#C[Si](C)(C)C	1.04626
820	C[Si](C)(C)C(=C=C(c1ccccc1)c1ccccc1)n1nnc2ccccc21	1.14827
821	C[Si](C)(C)C(=C=C(c1ccccc1)c1cn(Cc2ccccc2)nn1)n1nnc2ccccc21	1.17768
822	C[Si](C)(C)C(=C1c2ccccc2C(=O)N1n1cccc1)c1ccc(C(F)(F)F)cc1	1.30351
823	C[Si](C)(C)C(=O)C1c2cc3c(cc2CC1(O)[Si](C)(C)C)CC(O)([Si](C)(C)C)C3C(=O)[Si](C)(C)C	1.06226
824	C[Si](C)(C)C(c1ccccc1)(c1ccccc1)c1ccc(C(=O)c2ccccc2)cc1	1.1899
825	C[Si](C)(C)C(c1ccccc1)(c1ccccc1)c1ccccc1	1.12964
826	C[Si](C)(C)C(n1ccc2cccnc21)n1ccc2cccnc21	1.22605
827	C[Si](C)(C)C(O)CCN1C(=O)OCC1c1ccccc1	1.16161
828	C[Si](C)(C)C(O[Si](c1ccccc1)(c1ccccc1)c1ccccc1)=C(F)F	1.20269
829	C[Si](C)(C)C[C]([C]1c2ccccc2C(=O)N1n1cccc1)[Si](C)(C)C	1.10574
830	C[Si](C)(C)C=CC1C(C#N)C1c1ccc(Br)cc1	1.33694
831	C[Si](C)(C)C=CC1C(C(=O)c2ccccc2)C1c1ccc(Br)cc1	1.29846
832	C[Si](C)(C)C=Cn1c2ccccc2c2ccccc21	1.12317
833	C[Si](C)(C)C1([Si](C)(C)C)CCC([Si](C)(C)C)([Si](C)(C)C)[Si]12O[Si]1(O2)C([Si](C)(C)C)([Si](C)(C)C)CCC1([Si](C)(C)C)[Si](C)(C)C	1.13376
834	C[Si](C)(C)C1([Si](C)(C)C)CCC([Si](C)(C)C)([Si](C)(C)C)[SiH]1N(Cc1ccccc1)Cc1ccccc1	1.0888
835	C[Si](C)(C)C1=C(c2ccccc2)C(c2ccccc2)=C(I)[Si]1(C)C	1.39697
836	C[Si](C)(C)c1c(-c2ccccc2)n(-c2ccccc2)c2ccccc2c1=O	1.20134
837	C[Si](C)(C)C1C(O)Cc2ccccc2N2[N][N]CC12	1.21955
838	C[Si](C)(C)c1c2c(c([Si](C)(C)C)c3cc4ccccc4cc13)C1c3ccccc3C2C2C(=O)OC(=O)C12	1.28051
839	C[Si](C)(C)C1C2C=CC1C(C(=O)O)C2C(=O)O	1.19068
840	C[Si](C)(C)c1ccc(-n2c3ccccc3c3ccccc32)cc1	1.1196
841	C[Si](C)(C)Cc1c2ccccc2c(C[Si](C)(C)C)c2ccccc12	1.12362
842	C[Si](C)(C)Cc1c2ccccc2cc2ccccc12	1.12454
843	C[Si](C)(C)Cc1cc(C[Si](C)(C)C)c2ccc3c(C[Si](C)(C)C)cc(C[Si](C)(C)C)c4ccc1c2c43	1.03993
844	C[Si](C)(C)CCN1C(=O)c2ccccc2C1=O	1.14339
845	C[Si](C)(C)N([Si](C)(C)C)[Si](c1ccccc1)(c1ccccc1)[Si](c1ccccc1)(c1ccccc1)N([Si](C)(C)C)[Si](C)(C)C	1.12065
846	C[Si](C)(C)OC(=C(F)F)[Si](c1ccccc1)(c1ccccc1)c1ccccc1	1.2269
847	C[Si](C)(C)OC(c1ccccc1)(c1ccccc1)c1ccccc1	1.13443
848	C[Si](C)(C)OC1C2OC(=O)CC2C2(C=CC(=O)O2)C1O[Si](C)(C)C	1.15548
849	C[Si](C)(C)Oc1cc(O[Si](C)(C)C)c2cc1Cc1cc(c(O[Si](C)(C)C)cc1O[Si](C)(C)C)Cc1cc(c(O[Si](C)(C)C)cc1O[Si](C)(C)C)Cc1cc(c(O[Si](C)(C)C)cc1O[Si](C)(C)C)C2	1.10439
850	C[Si](C)(C=Cn1c2ccccc2c2ccccc21)c1ccccc1	1.20835
851	C[Si](C)(C1=CC(=O)C([Si](C)(C)c2ccccc2)=CC1=O)c1ccccc1	1.16821
852	C[Si](C)(c1ccc(Br)cc1)c1ccc(Br)cc1	1.60086
853	C[Si](C)(c1ccc(-n2c3ccccc3c3ccccc32)cc1)c1ccc(-n2c3ccccc3c3ccccc32)cc1	1.23726
854	C[Si](C)(c1ccccc1)[Si]12[Si](C)(C)[Si](C)(C)[Si]([Si](C)(C)c3ccccc3)([Si](C)(C)[Si]1(C)C)[Si](C)(C)[Si]2(C)C	1.09693
855	C[Si](C)(N(c1ccccn1)P(c1ccccc1)c1ccccc1)N(c1ccccn1)P(c1ccccc1)c1ccccc1	1.25473
856	C[Si](C)(O[Si](C)(C)[Si](c1ccccc1)(c1ccccc1)c1ccccc1)[Si](c1ccccc1)(c1ccccc1)c1ccccc1	1.14789
857	C[Si](C=C[Si](C)(c1ccccc1)c1ccccc1)(c1ccccc1)c1ccccc1	1.12423
858	C[Si](CCCN1C(=O)c2ccccc2C1=O)(c1ccccc1)c1ccccc1	1.16748
859	C[Si](Cl)(Cl)C1C[Si](Cl)(Cl)C([Si](C)(Cl)Cl)C[Si]1(Cl)Cl	1.65616
860	C[Si]1(C)C(c2ccc(-n3ccc4cccnc43)cc2)=C(c2ccccc2)C(c2ccccc2)=C1c1ccc(-n2ccc3cccnc32)cc1	1.27531
861	C[Si]1(C)C(c2cccc(-c3ccccn3)n2)=C(c2ccccc2)C(c2ccccc2)=C1c1cccc(-c2ccccn2)n1	1.22986
862	C[Si]1(C)C(c2ccccc2)=C(c2ccccc2)C(c2ccccc2)=C1c1ccccc1	1.15544
863	C[Si]1(C)c2ccccc2-c2cc3c(cc21)-c1ccccc1[Si]3(C)C	1.17707
864	C[Si]1(C)c2ccccc2-c2ccccc2[Si](C)(C)c2ccccc21	1.15355
865	C[Si]1(C)c2ccccc2N(c2ccccc2)c2ccccc21	1.20236
866	C[Si]1(C)Cc2ccccc2-n2c1c(-c1ccccc1)c1ccccc12	1.22003
867	C[Si]1(C)N(C2CCCCC2)C(=Nc2ccccc2)N1C1CCCCC1	1.12424
868	C[Si]1(C)O[Si](C)(C)c2cc3c(cc21)C1C=CC3O1	1.19428
869	C[Si]1(C)OC2c3ccccc3[Si](C)(C)OC2c2ccccc21	1.15307
870	C[Si]1(C)Oc2ccc3ccccc3c2-c2c(ccc3ccccc23)O[Si](C)(C)O1	1.25608
871	C[Si]1(C)OOC2(CCCCCCCCCCC2)OOC2(CCCCCCCCCCC2)OO1	1.14657
872	C[Si]1(c2ccccc2)C(c2ccccc2)=C(c2ccccc2)C(c2ccccc2)=C1c1ccccc1	1.18043
873	C[Si]12OCC3(CO1)CC31CO[Si](C)(OC1)O2	1.44574
874	C[SiH](C)[Si](c1ccccc1)(c1ccccc1)[Si](c1ccccc1)(c1ccccc1)[SiH](C)C	1.10036
875	C[SiH]12(c3ccccc3)Oc3ccccc3N1[CH]c1cccn12	1.2176
876	C=C(Br)C(C=O)(CCCc1ccccc1)c1ccc(OC)cc1	1.34828
877	C=C(C#N)CN1CCN(C(c2ccccc2)c2ccccc2)CC1	1.15298
878	C=C(C(=O)O)C1CCC(C)C2CC(=O)C(C)=C2C1	1.22525
879	C=C(C(=O)O)C1CCC2C(=CCC3C(C)(C)C(O)CCC23C)C1	1.17544
880	C=C(C(=O)OC)C(c1ccc(Cl)cc1)P(=O)(c1ccccc1)c1ccccc1	1.30584
881	C=C(C(=O)OC)C(c1ccccc1)C1(C#N)c2ccccc2C=CN1C(=O)c1ccc(Br)cc1	1.36256
882	C=C(C(=O)OC)C1(C2(C)C=CC(=O)O2)C(=O)N(C)c2ccccc21	1.2996
883	C=C(C(=O)OC)C1(O)C(=O)c2ccccc2C1=O	1.41172
884	C=C(C(=O)OC)c1c(-c2ccccc2)cc(C(=O)OC)cc1-c1ccccc1	1.25637
885	C=C(C(=O)OC)C1CCC2(C)CCCC(=C)C2(O)C1	1.20712
886	C=C(C(=O)OC)N1C(=O)c2ccccc2C1=O	1.41441
887	C=C(C(=O)OCC)C1(c2ccc([N+](=O)[O-])cc2)CC(C(=O)OC)=C(c2ccc(C)cc2)C1(C#N)C#N	1.27882
888	C=C(C(C)=O)C(c1ccc(Br)cc1)C1(C(C)C)N=C(c2ccccc2)OC1=O	1.37911
889	C=C(C(C)=O)C(c1ccc(Br)cc1)n1cccc1C#N	1.47086
890	C=C(C(C)=O)C1(NC(=O)OC(C)(C)C)C(=O)N(Cc2ccccc2)c2ccc(Br)cc21	1.40083
891	C=C(C(OC(C)=O)c1cccc2ccccc12)n1cccn1	1.25433
892	C=C(C)C(=CP1(=O)OCC(C)(C)CO1)C(=CC(=O)OC)C(=O)OC	1.25909
893	C=C(C)C(=O)N(C(=O)c1cccc(C(Cl)=Nc2c(C(C)C)cccc2C(C)C)n1)c1c(C(C)C)cccc1C(C)C	1.14225
894	C=C(C)C(=O)N(c1ccccc1C(C)(C)C)C(C)C	1.06547
895	C=C(C)C(=O)n1c(=O)n(C(=O)C(=C)C)c2ccccc21	1.29666
896	C=C(C)C(=O)NC(Cc1c[nH]c2ccccc12)C(=O)O	1.26462
897	C=C(C)C(=O)NC1COC(OCC)OC1	1.18359
898	C=C(C)C(=O)NCC(=O)O	1.28213
899	C=C(C)C(=O)OC(c1ccccc1)C(O)c1ccccc1	1.22126
900	C=C(C)C(=O)OC1(COC)C2CC3CC(C2)CC1C3	1.2087
901	C=C(C)C(=O)Oc1ccc(C(=O)C=Cc2ccc(OC)c(OC)c2)cc1	1.28511
902	C=C(C)C(=O)Oc1ccc(C(=O)C=Cc2ccccc2Br)cc1	1.49761
903	C=C(C)C(=O)Oc1ccc(C)cc1C(C)=O	1.22897
904	C=C(C)C(=O)Oc1ccc(O)c(C(C)=O)c1	1.31365
905	C=C(C)C(=O)OCc1cc(C#Cc2ccc(C)cc2)ccc1C#Cc1ccc(C)cc1	1.1689
906	C=C(C)C(=O)OCCN1CCNC1=O	1.3179
907	C=C(C)C(C)(C)Oc1ccc(O)cc1OC	1.18432
908	C=C(C)C(CC)CCC(C)C1CCC2C3CC(O)C4=CC(O)CCC4(C)C3CCC12C	1.0948
909	C=C(C)C1(n2[nH]c(=O)n(-c3ccccc3)c2=O)C2C=CC1c1cnncc12	1.30863
910	C=C(C)C1(O)CCC(C)(OCOC)C(C)(CCOCc2ccccc2)C1COC(=O)c1ccc([N+](=O)[O-])cc1	1.22994
911	C=C(C)C1=C(C(c2ccccc2)c2ccccc2)C(=O)OC1(C)C	1.18211
912	C=C(C)C12OC(=O)CC1C(C)(O)C1CCC3C(OC(C)=O)C1(C(OC(=O)CC)C2OC(C)=O)C(OC(C)=O)C3(C)OC(C)=O	1.29109
913	C=C(C)c1c([Si](C)(C)C)c(=O)c2ccccc2n1-c1ccccc1	1.1581
914	C=C(C)C1CC(=O)C(C)C(C#N)C1	1.06068
915	C=C(C)C1CC[C]2[CH]C(OC2=O)C(C(=C)C)C2=CC(C)(C(=O)O2)C1O	1.27796
916	C=C(C)C1CC=C(C)C(O)C1CCO	1.09829
917	C=C(C)C1CC2OC2(C)C(O)C1CO[Si](C)(C)C(C)(C)C	1.0158
918	C=C(C)C1CCC(=O)C2CCC(C)CC12	1.06964
919	C=C(C)C1CCC(C2CCC3C2=CC2(C=O)C4CCC2(C3O)C(O)C42CCC(C(C)(C)O)C2O)C1OC(C)=O	1.17798
920	C=C(C)C1CCC(O)(CNCc2ccccc2)C(O)C1	1.13039
921	C=C(C)C1CCC2(C)C(CC(=O)NC3C4CC(C)(C)CCC4(C(=O)OC)CCC32C)C1(C)CCC#N	1.18361
922	C=C(C)C1CCC2(C)CCC3(C)C(CCC4C5(C)C=CC(=O)C(C)(C)C5CCC43C)C12	1.10236
923	C=C(C)C1CCC2(C)CCC3(C)C(CCC4C5(C)CCC(O)C(C)(C)C5CCC43C)C12	1.07625
924	C=C(C)C1CCC2(C)CCC3(C)C(CCC4C5(C)CCC(OC(=O)C=Cc6ccc(O)c(OC)c6)C(C)(C)C5CCC43C)C12	1.16325
925	C=C(C)C1CCC2(COC(=O)N3[CH]N=C[N]3)CCC3(C)C(CCC4C5(C)CCC(OC(C)=O)C(C)(C)C5CCC43C)C12	1.17285
926	C=C(C)C1CCC2(COC(C)=O)CCC3(C)C(CCC4C5(C)CCC(OC(C)=O)C(C)(C)C5CCC43C)C12	1.12579
927	C=C(C)C1CCC2=Cc3c(cc(C)oc3=O)OC2C1	1.23421
928	C=C(C)C1CCC23[N][N]CC2C(OC3=O)C(C(=C)C)c2cc(C)c(o2)C1OC(C)=O	1.21645
929	C=C(C)C1CCc2cc(O)cc3c2C1OC3=O	1.26084
930	C=C(C)C1OC2CCC3(C)CCCCC3(O)C2=CC1O	1.18923
931	C=C(C)CC(C)C(=O)N1C(=O)OC(c2ccccc2)(c2ccccc2)C1C(C)C	1.18521
932	C=C(C)CC1(C(=O)OC)C(O)C(C)CN1C(=O)OC(C)(C)C	1.15608
933	C=C(C)CC1(C)N=C2CC3C(CC2(C)OC1=O)C3(C)C	1.09009
934	C=C(C)CN1CCN(CN2CCN(CC(=C)C)CC2)CC1	1.0263
935	C=C(C=C(c1ccc(OC)cc1)c1c(-c2ccccc2)n(C)c2ccccc12)c1ccccc1	1.20126
936	C=C(C=C1CCCCC1)C1=C(C)C(=O)OC12CCCCC2	1.16089
937	C=C(C=O)C1(O)C(=O)N(C)c2ccc(Cl)cc21	1.36042
938	C=C(C=O)C1c2cc(Cl)ccc2CCN1c1ccc(OC)cc1	1.35222
939	C=C(C=O)CC1CC(O)C2(C)OC3CC4OC5CC6(C)OC7(C)CCC8OC9CC%10(C)OC%11C(C)=CC(=O)OC%11CC%10OC9CC(C)C8OC7CC6OC5(C)CC=CC4OC3CC2O1	1.25652
940	C=C(c1[nH]c(C)c(CC)c1C)c1[nH]c(C)c(CC)c1C	1.07516
941	C=C(c1c(C)cc(C)cc1C)c1c(C)c(C)c(C(=C)c2c(C)cc(C)cc2C)c(C)c1C	1.10517
942	C=C(c1ccc(Br)cc1)C1CC(C(C)=O)(C(=O)OCC)N(C(=O)OCc2ccccc2)N1C(=O)OCc1ccccc1	1.37703
943	C=C(c1ccc(C)cc1)c1c(C(=O)OC)c(C(=O)OC)n2ccn(C)c12	1.27895
944	C=C(c1ccc(OC)c(O)c1)c1cc(OC)c(OC)c(OC)c1	1.27197
945	C=C(c1ccc2ccccc2c1)c1ccccc1CNC(C)=O	1.15773
946	C=C(c1ccc2ccccc2c1)N(C(C)=O)C(C)=O	1.23332
947	C=C(c1ccccc1)C12CCC(=O)N1C(=O)CC2	1.31905
948	C=C(c1ccccc1)c1c(C)cn(-c2ccc(C)cc2)c1-c1ccccc1	1.15821
949	C=C(c1ccccc1)c1c(-c2ccccc2)cc(-c2ccccc2)n1-c1ccccc1	1.19968
950	C=C(c1ccccc1)c1c(-c2ccccc2)nnn1Cc1ccccc1	1.22692
951	C=C(c1ccccc1)c1ccc(C)c(C)c1N=C(C)C(C)=Nc1c(C(=C)c2ccccc2)ccc(C)c1C	1.11537
952	C=C(c1ccccc1)c1nn(-c2cccc3ccccc23)nc1-c1ccccc1	1.26344
953	C=C(c1ccccc1C(C)C)c1ccccc1C(C)C	1.06416
954	C=C(CBr)C1CCC2(COC(C)=O)CCC3(C)C(CCC4C5(C)CCC(OC(C)=O)C(C)(C)C5CCC43C)C12	1.25853
955	C=C(CC(=O)c1ccccc1OC(=O)c1ccccc1)C(=O)OCC	1.29543
956	C=C(Cc1cc2c(CC(=C)c3ccccc3)c(-c3ccccc3)oc2nc1-c1ccccc1)c1ccccc1	1.19389
957	C=C(CCC=C(C)C)C1CCC2(C)C1CCC1C3(C)CCC(OC(C)=O)C(C)(C)C3CCC12C	1.08442
958	C=C(CCCCn1cnc2c1[N]C=N[C]2N)P(=O)(Oc1ccccc1)Oc1ccccc1	1.30763
959	C=C(Cl)C(=CC=Cc1ccccc1)C(=O)OC	1.26012
960	C=C(Cl)C(Cl)(CBr)CCC(Br)C(C)(C)Cl	1.80815
961	C=C(CN1CCCC1=CC(=O)c1ccccc1)c1ccccc1	1.18671
962	C=C(CO)C(=O)OC1CC(=C)C2CC(O)C(O)(CCl)C2C2OC(=O)C(=C)C12	1.41707
963	C=C(CO)C1CCC2C3(C)CCC(C(C)CCC(O)C(C)(C)O)C3(C)CCC23CC13CCC(=O)O	1.13657
964	C=C(COc1ccccc1)C(=C)COc1ccccc1	1.2554
965	C=C[Si](C)(C)c1ccc(C=Cc2ccc([Si](C)(C)C=C)cc2)cc1	1.06464
966	C=C[Si](C)(C=C)CC[Si]12O[Si]3(CC[Si](C)(C=C)C=C)O[Si]4(CC[Si](C)(C=C)C=C)O[Si](CC[Si](C)(C=C)C=C)(O1)O[Si]1(CC[Si](C)(C=C)C=C)O[Si](CC[Si](C)(C=C)C=C)(O2)O[Si](CC[Si](C)(C=C)C=C)(O3)O[Si](CC[Si](C)(C=C)C=C)(O4)O1	1.07645
967	C=C[Si](C=C)(C=C)C=C	0.995714
968	C=C=C(C(=O)OC)c1ccccc1C#N	1.26432
969	C=C=C(c1ccccc1)P(=O)(c1ccccc1)c1ccccc1	1.25068
970	C=C=C(c1ccccc1O)P(=O)(c1ccccc1)c1ccccc1	1.23859
971	C=C=Cc1ccc([N][N]c2ccc(C=C=C)cc2)cc1	1.22581
972	C=C1C(=C)C2CC1C1C2C2(C(=O)OC)OC1(C(=O)OC)C1C3CCC(C3)C12	1.28034
973	C=C1C(=O)C23C(=O)C(O)C4C(C)(C)C5OCC4(C(=O)C5=COC)C2CCC1C3O	1.37245
974	C=C1C(=O)C23C(=O)OC4CCC(C)(C)C5C(=O)OCC45C2C(O)CC1C3OC(C)=O	1.36108
975	C=C1C(=O)C23C(=O)OC4CCC(C)(C)C5C(=O)OCC45C2C(OC(C)=O)CC1C3OC(C)=O	1.34584
976	C=C1C(=O)C23C(=O)OC4CCC(C)(C)C5C(OC(C)=O)OCC45C2C(OC(C)=O)CC1C3OC(C)=O	1.30409
977	C=C1C(=O)C23C(O)C1CCC2C12COC3(O)C(O)C1C(C)(C)CCC2=O	1.40602
978	C=C1C(=O)C23C(O)CC4C(C)(C)C(=O)CCC4(C)C2C(O)CC1C3O	1.25812
979	C=C1C(=O)C23C(O)CC4C(C)(C)CCC(O)C4(C)C2CCC1C3O	1.22336
980	C=C1C(=O)C23C4CC5C(C)(C)CCC(O)C5(C(OC)O4)C2CCC1C3O	1.3429
981	C=C1C(=O)C23CC1CC(O)C2C1(CCCC2(C)COC(=O)C21)COC3=O	1.36701
982	C=C1C(=O)C23CC1CCC2C1(COC3=O)C(=O)C=CC(C)(C)C1C=O	1.32769
983	C=C1C(=O)C23CC1CCC2C12COC4OCC(C)(CCC1OC3=O)C42	1.37112
984	C=C1C(=O)N2c3ccccc3CC2C1c1cccc(Cl)c1	1.3482
985	C=C1C(=O)Nc2ccccc2-c2c1c1ccccc1n2C(=O)OCC	1.36494
986	C=C1C(=O)OC2(C)CCC1CC(O)C1(C)CCC(O1)C(C)(O)CCC2OC(C)=O	1.26756
987	C=C1C(=O)OC2C1C(OC(=O)C(C)=CC)C(OC(C)=O)C(C(=O)OC)=CCCC1(C)OC21	1.29566
988	C=C1C(=O)OC2C1C(OC(C)=O)CC(C)=CCCC(C)=CCCC1(C)OC21	1.15866
989	C=C1C(=O)OC2C1CC(O)C(=C)C1CCC(C)(O)C12	1.29545
990	C=C1C(=O)OC2C1CC(O)C1(C)OC1CCC1(C)OC21	1.28351
991	C=C1C(=O)OC2C1CC(OC(C)=O)C1(C)OC1CCC1(C)OC21	1.31762
992	C=C1C(=O)OC2C1CCC(C)=CCCC1(C)OC21	1.19698
993	C=C1C(=O)OC2CC(C)C3C=CC(=O)C3(C)CC12	1.30256
994	C=C1C(=O)OC2CC1CCC(C)(O)C(O)CCC(C)=CCCC2(C)O	1.1951
995	C=C1C(=O)OC2CC3(C)CCCC(=C)C3(O)CC12	1.24356
996	C=C1C(=O)OC2CC3(C)CCCC(C)C3(O)CC12	1.18827
997	C=C1C(=O)OC2CC3(C)OC3C3OC3[C]3[CH]C(OC3=O)C12	1.45157
998	C=C1C(=O)OC2CC3(C)OC3CCC(C)=CCCC(C)=CCC12	1.12009
999	C=C1C(=O)OC2CC3C4(C)CCC(C(C)CCC=C(C)CO)C4(C)CCC34CC4(CCC(=O)OC)C12	1.18423
1000	C=C1C(=O)ON(C(=O)OCc2ccccc2)C1C	1.31211
1001	C=C1C(C(C)(O)C(=O)O)CC2CC1C2(C)C	1.17003
1002	C=C1C(C(C)C)=CC2(O)C3(C)CC(=O)OC4(C(O)C(C)CCC34O)C12O	1.25845
1003	C=C1C(C2(C)C=CC(=O)C(C)(C)C2CC(=O)OC)CCC2(C)C(c3ccoc3)OC(=O)C3OC132	1.27756
1004	C=C1C(COC(=O)c2ccc(Cl)cc2)C(c2ccc(Br)cc2)NC1(COC(=O)c1ccc(Cl)cc1)COC(=O)c1ccc(Cl)cc1	1.47627
1005	C=C1C(OC(=O)c2ccccc2)CC2C(C=C(C)C(=O)C3(OC(C)=O)CC(C)C(OC(=O)c4ccccc4)C3C1OC(C)=O)C2(C)C	1.17024
1006	C=C1C(OC(C)=O)CCC2(C)CC(OC(C)=O)[C]3[C](C)CC(OC(=O)C(C)CC)C(C(OC(C)=O)C12)C3(C)C	1.18218
1007	C=C1C=CC(C(C)COC(=O)C23CCC(C)(C(=O)O2)C3(C)C)CC1	1.16897
1008	C=C1C2(C(=O)O)CCC(C2)C1(C)C	1.17768
1009	C=C1C2(C)CC3C4(C)CCC(=O)C(C)(C)C4CCC3(C)C1(C(=O)OC)C(=O)C(C)(O)C2=O	1.30023
1010	C=C1C2(C)CCC3(OC(=O)OC3C3C(OCOC)CCC(OCc4ccccc4)C3(C)C2O)C1(C)C	1.25871
1011	C=C1C2=C(C(=O)N1OC)C(O)C(C)(O)C(CCCCC)O2	1.18227
1012	C=C1c2c(C)nn(-c3ccccc3)c2N(C)C(=O)c2ccccc2N1C(C)=Nc1ccccc1C(=O)N(C)c1cc(C)nn1-c1ccccc1	1.21284
1013	C=C1C2CC(=O)c3c(c4ccccc4n3C)C1N(C)C=C2C(=O)N1CCCC1COC	1.24914
1014	C=C1C2CC(O)C3C4(CCCC5(C)COC(=O)C54)COC(=O)C3(C2)C1O	1.33956
1015	C=C1C2CC(OC(C)=O)C3C(C2)(C(=O)OCC32C(OC(C)=O)CCC(C)(C)C2COC(C)=O)C1OC(C)=O	1.29362
1016	C=C1c2cc(OC)c(OC)cc2-c2oc(=O)c3ccccc3c21	1.42773
1017	C=C1c2cc(OC)c(OC)cc2-c2oc(=O)cc(-c3ccccc3)c21	1.32464
1018	C=C1C2CC2C2(C)C1C(OC(C)=O)C1=C(C)C(=O)OC13C1=C4C(C)(CC(=O)C1=C(C)C(=O)OC)C1CC1C4(O)CC32	1.27314
1019	C=C1C2CC2C2(C)C1CC1=C(C)C(=O)OC13C2C1C2(C)C(CC4=C(C)C(=O)OC413)C(=C)C1CC12	1.23724
1020	C=C1C2CC2C2(C)CCC(=C(C)C(=O)OC)CC12	1.19024
1021	C=C1C2CC3(C)C(=C)C4(C(=O)OC(C)C4(O)C3=O)C2(C)CCC12C=CC(=O)OC2(C)C	1.32005
1022	C=C1C2CC3c4[nH]c5ccccc5c4CC(C2=O)N3C1C	1.24976
1023	C=C1C2CCC3C(C2)(C(=O)C(OC(C)=O)C2C(C)(C)C4CC(=O)C23CO4)C1OC(C)=O	1.26435
1024	C=C1C2CCC3C4(C)C(CCC5(C)C(=O)OC(O)C54)C(O)C3(C2)C1OC1OC(CO)C(O)C(O)C1O	1.38283
1025	C=C1C2N(CC)C(=O)C3(C)CCC(OC)C24C2CC(C)CC2C1(O)C(OC)C34	1.24267
1026	C=C1C2OC(OCC)C3C1(O)CC(OC(C)=O)C3(CCl)O2	1.37411
1027	C=C1CC(C#N)(C#N)C2(C(=O)N(C)c3ccc(Br)cc32)N1C(=O)OC(C)(C)C	1.46807
1028	C=C1CC(C(C)(O)CO)CC2CCCC(O)C12C	1.16546
1029	C=C1CC(C)=C(c2ccccc2)C2(c3ccccc3)C(=O)C(C)(C)C12	1.14053
1030	C=C1CC(O)C2OC2(C)CCC2C(C(OC(C)=O)C(C=C(C)C)OC(C)=O)=COC(OC(C)=O)C12	1.20582
1031	C=C1CC(O)CC2(C)CC3OC(=O)C(C)(O)C3CC12	1.3009
1032	C=C1CC=CC2(C)CC3(O)OC(=O)C(C)=C3CC12	1.25333
1033	C=C1CC2(C)CCC(C(=C)C)CC2OC1=O	1.16003
1034	C=C1CC2(C)CCCCC2OC1=O	1.19572
1035	C=C1CC2(OC)CCCCC2OC1=O	1.28305
1036	C=C1CC23C(O)C4C5C(C)(C=O)C(OC(C)=O)C(OC(=O)c6ccccc6)C(OC(C)=O)C56C(C2C(OC(=O)c2ccccc2)C1C(OC(C)=O)C36)N4C	1.30132
1037	C=C1CC23C=CC(=O)C(C)(CCC(=O)Nc4c(O)ccc(C(=O)O)c4O)C2CC1CC3	1.26497
1038	C=C1CC23CC1CC(O)C2C1(C)C(=O)CCC(C)(C(=O)O)C1CC3O	1.30287
1039	C=C1CC23CCC1CC2CC(C)(O)OC3	1.18869
1040	C=C1CC23CCC4C(C)(C)C(O)CCC4(C)C2CC1CC3=O	1.20683
1041	C=C1CC23CCC4C(C)(CCC(O)C4(C)C(=O)O)C2=CCC1C3	1.22704
1042	C=C1CC2C3CCC(=O)C3(C)CCC2C2(C)CCC(=O)C=C12	1.16895
1043	C=C1CCC(=O)C(C)CCC2C(=C(C)C)C(=O)CC2(C)CC1OC(C)=O	1.16903
1044	C=C1CCC(NC(=O)c2ccccc2)(C(=O)OC)CC1	1.26717
1045	C=C1CCC23CC2(C)CCCC(C)(C)C3C1OC1C(C)=CCC23CC2(C)CCCC(C)(C)C13	1.08004
1046	C=C1CCC2C(C)(CO)C(O)CCC2(C)C1CC(C[N+](=O)[O-])C1=CCOC1=O	1.28518
1047	C=C1CCC2C(C)(CO)C(O)CCC2(C)C1CCC1=CCOC1=O	1.21736
1048	C=C1CCC2C(C)(O)CCC(C(C)C)C2(O)C1	1.07765
1049	C=C1CCC2C(C)C(=O)OC2C2C(=C)C(O)CC12	1.24548
1050	C=C1CCC2C(C=C(C)C(=O)C3(OC(C)=O)CC(C)C(OC(=O)c4cccnc4)C3C1OC(C)=O)C2(C)C	1.19289
1051	C=C1CCC2C(c3ccccc3)c3c(O)c(C=O)c(O)c(C=O)c3OC2(C)CCC2C1CC2(C)C	1.27794
1052	C=C1CCC2C(OC(=O)C2(O)CO)C2C(C)C(=O)CC12	1.35243
1053	C=C1CCC2C(OC(=O)C2(O)CO)C2C1CC(O)C2C	1.30605
1054	C=C1CCC2C3(C)COC(C)(C)OC3CCC2(C)C1C=CC1=CCOC1=O	1.18345
1055	C=C1CCC2C3(C)COC(C)(C)OC3CCC2(C)C1CCCCC1C(=C)CCC2C3(C)COC(C)(C)OC3CCC12C	1.10183
1056	C=C1CCC2C3(C)COC(C)OC3CCC2(C)C1CC=C1C(=O)OCC1OC(C)=O	1.27748
1057	C=C1CCC2C3(C)COC(c4c(OC)cccc4OC)OC3CCC2(C)C1CC=C1C(=O)OCC1O	1.32929
1058	C=C1CCC2C3(C)COC(c4ccccc4Br)OC3CCC2(C)C1CC=C1C(=O)OCC1O	1.43328
1059	C=C1CCC2CC1C(C(=O)c1c[nH]c3ccccc13)=NC2(C)C	1.21416
1060	C=C1CCC2CCCCC23COC(c2c[nH]c4ccccc24)C13	1.1818
1061	C=C1CCCC(C(=O)O)(C(=O)O)C1	1.29559
1062	C=C1CCCC23OC(=O)CCC2(C)CCCC13	1.18941
1063	C=C1CCOC2(C(O)C(C)(O)CO)NC(=O)C1(O)NC2=O	1.5296
1064	C=C1CN(Cc2ccccc2)C(=O)C(=O)N(Cc2ccccc2)CC(=C)CN(Cc2ccccc2)C(=O)C(=O)N(Cc2ccccc2)C1	1.22028
1065	C=C1COC2(OC1)OCC(=C)CO2	1.30586
1066	C=C1OC(=O)N2C(C(=O)OC)CC3CCC1C32	1.37075
1067	C=C1OC(=O)OC1C(O)C(OC(C)=O)C(OC(C)=O)C(COC(C)=O)OC(C)=O	1.36713
1068	C=C1OC(=O)OC1C(O)C1COC(C)(C)N1C(=O)OC(C)(C)C	1.2667
1069	C=CC(=O)N(c1ccc(C)cc1I)C(C(=O)OC)C(C)C	1.50258
1070	C=CC(=O)N(c1ccccc1)C1CCN(CC(O)c2ccc(Br)cc2)CC1C	1.33528
1071	C=CC(=O)N(Cc1ccccc1)c1ccc(Cl)cc1	1.27323
1072	C=CC(=O)N1C(c2ccc(Cl)cc2)C(C)C(=O)C(C)C1c1ccc(Cl)cc1	1.31575
1073	C=CC(=O)NC(C)C(=O)O	1.25073
1074	C=CC(=O)NC(Cc1ccccc1)C(=O)O	1.29172
1075	C=CC(=O)Nc1ccc(Cl)cc1	1.38062
1076	C=CC(=O)Nc1ccc(O)cc1	1.26299
1077	C=CC(=O)NC1COC(OCC)OC1	1.2441
1078	C=CC(=O)NCNC(=O)C=C	1.22541
1079	C=CC(=O)Oc1c(C)cc([N][N]c2ccc(Br)cc2)cc1C	1.43809
1080	C=CC(=O)Oc1ccc(C(C)=O)c(O)c1	1.32278
1081	C=CC(=O)OCCOCc1ccc(O)c2ncccc12	1.31486
1082	C=CC(C#Cc1ccccc1)=C(c1ccccc1)c1ccccc1	1.14842
1083	C=CC(C)(C)c1[nH]c2c(CC(O)C(C)(C)OC)cccc2c1C=C1NC(=O)C(C)NC1=O	1.2325
1084	C=CC(C)(C)c1c(OC(C)=O)c2ccc(=O)oc2c2ccoc12	1.35006
1085	C=CC(C)(C)c1c2c(c(O)c3c(=O)c4ccc(O)c(O)c4oc13)C=CC(C)(C)O2	1.4178
1086	C=CC(C)C1CCC2C3C(OC=O)CC4CC(OC=O)CCC4(C)C3CC(OC=O)C12C	1.22053
1087	C=CC(c1ccc(Br)cc1)C(CC)NC(=O)OC(C)(C)C	1.27819
1088	C=CC(c1ccc(Br)cc1)C12CCOC1N(C(=O)C(F)(F)F)c1ccccc12	1.55697
1089	C=CC(c1ccccc1)C(C)C(OC(=O)C(C)c1ccc2cc(OC)ccc2c1)c1ccccc1	1.18786
1090	C=CC(c1ccccc1)C1(C(F)(F)F)NC(c2ccccc2)COC1=O	1.33796
1091	C=CC(CCC)C(C(=O)N1CCOCC1)c1ccccc1	1.13367
1092	C=CC(COC(=O)Nc1ccccc1)C1CCCN1C(=O)OC(C)(C)C	1.19345
1093	C=CC(O)(CC)C1OC(C)(C)OC1(CC)C1=CC(=O)OC1	1.16079
1094	C=CC(O)C(C)(O[Si](c1ccccc1)(c1ccccc1)C(C)(C)C)C(COC(C)=O)OC(C)=O	1.18071
1095	C=CC(O)C1C2CCC(C)(C1O)C2(C)C	1.10394
1096	C=CC(O)CC1CCC(C)(O)C2(CCC3(CCCC(CO)O3)O2)O1	1.25223
1097	C=CC(OC(C)=O)C1OC(C)(C)OC1C=NNC(=O)OC(C)(C)C	1.17763
1098	C=CC1([O])C(OCc2ccccc2)CC(=O)N1Cc1ccc(OC)cc1	1.23629
1099	C=CC1(C)C(=O)N(C)c2c(C)cc(Br)cc21	1.47286
1100	C=CC1(C)C=C2CCC3C(C)(C(=O)O)CCCC3(C)C2CC1	1.12996
1101	C=CC1(C)C=C2CCC3C(C)(CO)CCCC3(C)C2C(O)C1	1.1017
1102	C=CC1(C)CC(=O)C2C(C)(O1)C(OC(C)=O)C(OC(C)=O)C1C(C)(C)CCC(O)C12C	1.24304
1103	C=CC1(C)CC2OC(=O)CC3(C)C2C(C)(CC2OC(=O)C(C)(C)C23)O1	1.2402
1104	C=CC1(C)CCC2(C)C(CCC3(C)C(=CO)C(=O)CCC32)C1	1.16319
1105	C=CC1(C)CCC2(C)C(CCC34COC(=O)C3=CC(O)CC42)C1	1.18156
1106	C=CC1(C)CCC2C3(C)CCC(=O)C4(C)C(=O)OC(C43)C3OC32C1	1.24722
1107	C=CC1(C)COC(=O)C12OC1(c3ccccc3)C(C2=O)C2C(C(C)CCC=C(C)C)CC=C(C)C21	1.16969
1108	C=CC12C=CCN3CCC4(c5ccccc5NC(=O)C4(C(=O)OC)C1)C32	1.2696
1109	C=CC12COC(=O)C(=C)C1C(OC(C)=O)C(C(=C)C(=O)OC)C(OC(=O)C(=C)COC(C)=O)C2	1.27495
1110	C=CC1C(C(=O)OC)CC(C)C(O)C1O	1.18463
1111	C=Cc1c(C)c(OC(C)=O)cc2c1-c1ccc(OC(C)=O)c(C)c1CC2	1.26979
1112	C=CC1C(OC2OC(CO)C(O)C(O)C2O)OC=C2C(=O)OC(O)CC21	1.46263
1113	C=CC1C=CC2C3CC(C)CCC3C3Oc4ccc(cc4)CC4CC(=C(O)C1C23)C(=O)O4	1.22373
1114	C=CC1C2(C)C=CC(=O)C1(C)C1(C)OC3C(=CC)C(=O)OC3C21	1.24233
1115	C=CC1CC(C(=O)OC)(C(=O)OC)C(c2ccccc2)C1C(=O)C(=O)NCc1ccc(Br)cc1	1.38555
1116	C=CC1CC(Cc2ccc(OC)c(O)c2)C2C(=O)C=CC(=C)C12	1.20892
1117	C=CC1CCC(C(=O)OC)N2C(=O)CC=CC12	1.25443
1118	C=Cc1ccc(CC2(CCN3CCCCC3)C(=O)OC(C)(C)OC2=O)cc1	1.19994
1119	C=Cc1ccc(CN2CCN(Cc3ccc(C=C)cc3)CCN(Cc3ccc(C=C)cc3)CCN(Cc3ccc(C=C)cc3)CC2)cc1	1.11567
1120	C=Cc1ccc(N(c2ccc(-n3c4ccccc4c4ccccc43)cc2)c2ccc(-n3c4ccccc4c4ccccc43)cc2)cc1	1.21035
1121	C=Cc1ccc(N(c2ccccc2)c2ccccc2)cc1	1.17106
1122	C=Cc1ccc(-n2c3ccccc3c3ccccc32)cc1	1.21626
1123	C=CC1CCC2C3CCC4CC(=O)C=CC4(C)C3CCC12C	1.12923
1124	C=CC1CN2CCC1CC(O)C2c1ccnc2ccccc12	1.20623
1125	C=CC1CN2CCC1CC2C(c1ccnc2ccc(OC)cc12)C(c1ccnc2ccc(OC)cc12)C1CC2CCN1CC2C=C	1.22447
1126	C=CC1CN2CCC1CC2C(N=Cc1ccccc1O)c1ccnc2ccc(OC)cc12	1.24074
1127	C=Cc1nc2ccccc2c(C#N)c1-c1c(O)cc(C(=O)OC)n1C	1.3448
1128	C=CC1OC(=NO)C2OC(C)(C)OC12	1.26248
1129	C=CC1OC(=O)CC2OC(CC(=C)C(O)C(C)CC(O)C1(C)C)CC(O[Si](C(C)C)(C(C)C)C(C)C)C2C	1.05278
1130	C=CC1OC(=O)OC2C1C1CCC2(C)C1(C)C	1.21894
1131	C=CC1OC(c2ccccc2)=Nc2cc(Br)ccc21	1.53204
1132	C=CCC(=C(OC(C)=O)c1ccccc1)c1ccccc1	1.18364
1133	C=CCC(C#CC#CC(CC=C)=C(C#Cc1ccc(OC)cc1)[Si](C)(C)C)=C(C#Cc1ccc(OC)cc1)[Si](C)(C)C	1.10081
1134	C=CCC(CC(=O)OCC)C(=O)N1C(=O)OCC1Cc1ccccc1	1.22067
1135	C=CCC(Cl)=C(OC(C)=O)c1ccc(OC)c(OC)c1	1.32266
1136	C=CCC1(C)N=C2C3CCC(C)(C2OC1=O)C3(C)C	1.11637
1137	C=CCC1(CC)CCC2OCC(c3ccccc3)N2C1=O	1.21751
1138	C=CCC1(NC(=O)c2ccccc2)C(=O)C(C(C)C)N(C(=O)c2ccccc2)C1=O	1.29713
1139	C=CCC1(O)C2CC(C)=CC1(NC(=O)OC(C)(C)C)c1ccc(OC)nc1C2	1.19977
1140	C=CCC12OC(C)(C)OC1C(=O)C1C3C=CC(C3)C1C2O	1.27618
1141	C=CCC12OC(C)(C)OC1C(O)C1C3C=CC(C3)C1C2=O	1.24254
1142	C=CCC12OC(CC(C)C1I)C1OC3(CC1O2)C(C)CC(C)CN3C(=O)OCC[Si](C)(C)C	1.37638
1143	C=CCc1cc([N][N]c2ccc([N+](=O)[O-])cc2)c(OC(=O)c2ccccc2)c(OC)c1	1.28511
1144	C=CCC1CC(C(=O)OC)N(C(=O)OC(C)(C)C)C1P(=O)(OC)OC	1.22668
1145	C=CCc1cc2c(O)c(c1)Cc1cccc(c1O)Cc1cc(CC=C)cc(c1O)Cc1cccc(c1O)C2	1.26341
1146	C=CCc1ccccc1C1CN(C)C(c2ccccc2CC=C)CN1C	1.12373
1147	C=CCc1ccccc1OC(=Nc1ccccc1)c1ccccc1	1.21328
1148	C=CCN(CC=C)C1=C(Br)C(=O)OC1OC1CC(C)CCC1C(C)C	1.30337
1149	C=CCN(CC=C)C1CCCCC1NC(=O)Nc1cc(C(F)(F)F)cc(C(F)(F)F)c1	1.35103
1150	C=CCn1c(=O)[nH]c2ccccc21	1.23618
1151	C=CCN1C(=O)C(=NNC(=O)c2ccccc2)c2ccccc21	1.36886
1152	C=CCN1C(=O)C(=O)c2cc(Br)ccc21	1.71886
1153	C=CCn1c(=O)c(=O)n(CC=C)c2ccccc21	1.32228
1154	C=CCN1C(=O)C(C(NC(=O)OCc2ccccc2)C(C)C)C1C=Cc1ccccc1	1.15027
1155	C=CCn1c(=O)c(C)nc2ccccc21	1.29752
1156	C=CCN1C(=O)C(c2ccc(C)cc2)(c2ccc(C)cc2)c2ccccc21	1.19304
1157	C=CCn1c(=O)c(-c2ccccc2)nc2ccccc21	1.24398
1158	C=CCN1C(=O)C2(CC(c3ccc(F)cc3)=CC(=O)O2)c2cc(OC)ccc21	1.3594
1159	C=CCn1c(=O)n(CC=C)c2c3c(ccc21)C(=O)c1ccccc1C3=O	1.38738
1160	C=CCn1c(=O)n(CC=C)c2cc(Cl)ccc21	1.32514
1161	C=CCn1c(=O)n(Cc2ccccc2)c2ccccc21	1.24094
1162	C=CCn1c(=O)oc2ccc(Br)cc21	1.72493
1163	C=CCn1c(C(C)O)nc2ccccc21	1.19666
1164	C=CCn1c(C=O)cc2c(=O)n(C)c(=O)n(C)c21	1.38014
1165	C=CCN1C2=C(C(=O)CC(C)(C)C2)C(COC(C)=O)C2=C1CC(C)(C)CC2=O	1.13952
1166	C=CCn1c2c(c(O)c(C(=O)O)c1=O)CCCC2	1.38055
1167	C=CCn1c2ccc(Br)cc2c2cc(Br)ccc21	1.76805
1168	C=CCn1c2ccc(C=O)cc2c2cc(C=O)ccc21	1.32544
1169	C=CCN1C2CCCCC2N(CC=C)C(c2ccccc2)C1c1ccccc1	1.10267
1170	C=CCN1CC(=Cc2ccc(OC)cc2)C(=O)C(=Cc2ccc(OC)cc2)C1	1.22241
1171	C=CCn1cc(C(CCO)P(=O)(OC)OC)c2cc(I)ccc21	1.64545
1172	C=CCN1CC2C(c3ccccc3)ON(C(C)(C)C)C2C1C(O)c1ccccc1	1.15886
1173	C=CCn1cc2cccc([N+](=O)[O-])c2n1	1.39681
1174	C=CCN1CC2CON(Cc3ccccc3)C2C1C(O)c1ccccc1	1.20539
1175	C=CCN1CCCC2C3CCC4=CC(=O)CCC4(C)C3CCC21C	1.13522
1176	C=CCn1nc(Cl)c2cc([N+](=O)[O-])ccc21	1.43966
1177	C=CCn1nc(Cl)c2ccc([N+](=O)[O-])cc21	1.45408
1178	C=CCn1ncc2ccc([N+](=O)[O-])cc21	1.40954
1179	C=CCNC(=O)C(C)NC(=O)OC(C)(C)C	1.13131
1180	C=CCOC(=O)Nc1cc(OC)c(COc2ccccc2)c(OC)c1	1.24993
1181	C=CCOc1cc(OCC=C)c2c(=O)cc(-c3ccccc3)oc2c1	1.27958
1182	C=CCOc1ccc([N+](=O)[O-])cc1C(=O)O	1.44363
1183	C=CCOc1ccc(Br)cc1C(=C=C1CC1)c1ccc(Br)cc1	1.59729
1184	C=CCOc1ccc(C(=O)c2ccccc2)cc1	1.23005
1185	C=CCOc1ccc(C(=O)OC2CCC3(C)C(=CCC4C3CCC3(C)C(C(C)=O)CCC43)C2)cc1	1.19639
1186	C=CCOc1ccc(Cl)cc1C(=O)O	1.44383
1187	C=CCOC1OC2COC(c3ccccc3)OC2C(O)C1N1C(=O)c2c(Cl)c(Cl)c(Cl)c(Cl)c2C1=O	1.50944
1188	C=CCOCC1c2c(c(OC)c(C)c(OC)c2OCC=C)CC2C3c4c(O)c(OC)c(C)c(OC)c4CC(C(=O)N12)N3C	1.25373
1189	C=Cn1cc(C=O)c2ccccc21	1.29275
1190	C=Cn1nc(C)cc1C(OC(=O)C(C)(C)C)=C(C#N)c1ccc(C(C)(C)C)cc1	1.1123
1191	C=COC(=O)c1c(C)n(-c2ccccc2)c(=O)c2c1[nH]c1ccccc12	1.31001
1192	C=CP(=O)(c1ccccc1)C(C)(C)C	1.15798
1193	C1#Cc2cccc(c2)C#CCOCC#Cc2cccc(c2)C#CCOC1	1.2704
1194	C1#CCCCN2CCCC#CCCCN(CCC1)CCCC#CCCC2	1.14038
1195	C1#CCN2CCN(CC#CCOc3ccc4ccc(cc4c3)OC1)CC2	1.22846
1196	C1#CCOc2ccc(cc2)OCC#CCOc2ccc(cc2)OC1	1.39061
1197	C1=C(c2ccc3c(c2)OCO3)Cc2ccccc21	1.34742
1198	C1=C(c2ccccc2)C2CC=C(c3ccccc3)C2C1	1.16482
1199	C1=C(c2ccccc2)c2ccccc2Cc2c1oc1ccccc21	1.26489
1200	C1=C(c2ccccc2)N2c3ccccc3COC2c2ccccc21	1.32036
1201	C1=C(c2ccccc2)P2C(c3ccccc3)=CC1(c1ccccc1)c1ccccc12	1.25227
1202	C1=C(Cc2ccc[nH]2)c2ccccc2C1	1.1956
1203	C1=C[N]C2=c3ncccc3=C([N]c3ccccc3)C2=C1	1.31842
1204	C1=C2CCCCCCC3CCN4CCC=C(CCCCCCC5CCN(CC1)C2O5)C4O3	1.13362
1205	C1=CC(c2ccccc2)(c2ccccc2)Oc2cc3c(cc21)oc1ccccc13	1.29515
1206	C1=CC(c2ccccc2)(c2ccccc2)Oc2ccc3ccccc3c21	1.26517
1207	C1=CC2(Oc3c1ccc1ccccc31)c1ccccc1-c1ccccc12	1.27579
1208	C1=CC2(Oc3ccc4oc5c(c4c31)CCCCC5)c1ccccc1-c1ccccc12	1.26718
1209	C1=CC2(OCCO2)C2C=CC3(OCCO3)C12	1.40872
1210	C1=CC2=CC=CC3=CC4=C5C=CC=C6C=CC=C(C=C4C(=C1)[C]23)[C]65	1.37476
1211	C1=CC2=CC3=C(COC3)C3=C4C=CC=C5C=C6COCC6=C([C]54)C(=C1)[C]23	1.42268
1212	C1=CC2C=CC1C2c1ccc([Si](c2ccc(C3C4C=CC3C=C4)cc2)(c2ccc(C3C4C=CC3C=C4)cc2)c2ccc(C3C4C=CC3C=C4)cc2)cc1	1.17545
1213	C1=CC2C1C1(c3ccccc3)OC2(c2ccccc2)c2ccccc21	1.22004
1214	C1=CC2C3CCC4C(CCC3C1C21OCCO1)C1C=CC4C12OCCO2	1.30845
1215	C1=CC2c3ccccc3C1c1ccccc12	1.22624
1216	C1=CC2CC1C1(c3ccccc3)C(C3CC3c3ccccc3)C21C1CC1c1ccccc1	1.16364
1217	C1=CC2CC1C1C2C2C3C=CC(C3)C12	1.19333
1218	C1=Cc2ccc(cc2)N(c2ccccc2)c2ccc(cc2)C=Cc2ccc(cc2)N(c2ccccc2)c2ccc1cc2	1.20772
1219	C1=Cc2ccc(cc2)OCc2ccc(cc2)COc2ccc1cc2	1.23851
1220	C1=Cc2ccc(o2)[C](c2ccccc2)c2ccc(o2)C=Cc2ccc(o2)[C](c2ccccc2)c2ccc1o2	1.33051
1221	C1=Cc2ccccc2C(n2ccnc2C2=Cc3ccccc3Cc3ccccc32)c2ccccc21	1.25521
1222	C1=Cc2ccccc2C1=C1C=Cc2ccccc21	1.23036
1223	C1=Cc2ccccc2C2=C(c3ccccc31)C13C4=C(c5ccccc5C=Cc5ccccc54)C21c1ccccc1C=Cc1ccccc13	1.24887
1224	C1=Cc2cn(c3ccccc23)Cc2cccc(c2)Cn2cc1c1ccccc12	1.29289
1225	C1=CCCO[PH]2([N][PH](c3ccccc3)(c3ccccc3)[N][PH](c3ccccc3)(c3ccccc3)[N]2)OCC1	1.32803
1226	C1=CCO[PH]2([N][PH]3([N][PH](c4ccccc4)(c4ccccc4)[N]2)OCC=CCO3)OC1	1.45631
1227	C1=CCO[PH]2([N][PH]3([N][PH]4([N]2)OCC=CCO4)OCC=CCO3)OC1	1.55682
1228	C1=NCCCCN=Cc2ccccc2OCCOCCOc2ccccc21	1.18804
1229	C1=NCCCN=Cc2ccccc2OCCCCOc2ccccc21	1.25314
1230	c1c(OCc2nnn[nH]2)cc(OCc2nnn[nH]2)cc1OCc1nnn[nH]1	1.53017
1231	c1c[nH]c(C(c2ccc(C(c3ccc[nH]3)c3ccc[nH]3)cc2)c2ccc[nH]2)c1	1.23064
1232	c1c[nH]c(-c2nc3ccccc3nc2-c2ccc[nH]2)c1	1.34087
1233	c1c[nH]c(CCc2ccc[nH]2)c1	1.19358
1234	C1c2c(c3c(c4c2C2CCC4CC2)C2CCC3CC2)-c2c1c1c(c3c2C2CCC3CC2)C2CCC1CC2	1.24128
1235	c1c2c(cc3c1OCC3)OCC2	1.37746
1236	c1cc([C]2[N]N[C](c3ccncc3)[N]N2)ccn1	1.40516
1237	c1cc([C]2N=C(c3cnccn3)[N]N2)nc(C2=N[C](c3cnccn3)N[N]2)c1	1.4957
1238	c1cc(C(N2CCOCC2)N2CCOCC2)ccc1C(N1CCOCC1)N1CCOCC1	1.2163
1239	c1cc(C2=NCCO2)cc(C2=NCCO2)c1	1.33912
1240	c1cc(C23C4C5C6C4C2C6C53)ccc1C12C3C4C5C3C1C5C42	1.32718
1241	c1cc(-c2cc(-c3cc[nH]n3)cc(-c3cc[nH]n3)c2)n[nH]1	1.42648
1242	c1cc(-c2ccc3ccccc3n2)nc(-c2ccc3ccccc3n2)c1	1.35693
1243	c1cc(-c2cccc3cccnc23)nc(-c2cccc3cccnc23)c1	1.31248
1244	c1cc(-c2nc(-c3ccncc3)c(-c3ccncc3)[nH]2)ccn1	1.35696
1245	c1cc(-c2nnn[nH]2)c2cc[nH]c2c1	1.43391
1246	c1cc(CCc2ccncc2)ccn1	1.20808
1247	c1cc(CN2CCCNCCCNCCCNCC2)ccc1CN1CCCNCCCNCCCNCC1	1.07897
1248	c1cc(CN2CCOCC2)cc(CN2CCOCC2)c1	1.16008
1249	c1cc(Cn2nnc3ccccc32)nc(Cn2nnc3ccccc32)c1	1.37643
1250	c1cc(COc2ccc3ccc4ccc(OCc5ccncc5)nc4c3n2)ccn1	1.3512
1251	c1cc(N(c2ccc(N(c3ccncc3)c3ccncc3)cc2)c2cccc(-n3cccn3)n2)nc(-n2cccn2)c1	1.31955
1252	c1cc(P(CCP(c2ccncc2)c2ccncc2)c2ccncc2)ccn1	1.32062
1253	C1CC1CC(CC1CC1)(CC1CC1)CC1CC1	1.03336
1254	c1cc2c(cc1-c1ccc3c(c1)CC3)CC2	1.19077
1255	c1cc2c(cc1CNc1ccc(NCc3ccc4c(c3)OCO4)cc1)OCO2	1.42377
1256	C1CC2C(CCC3COC4OCCC34)COC2O1	1.30033
1257	c1cc2c3c(c1)C1CCCCC1c1cccc(c1-3)C1CCCCC21	1.25486
1258	c1cc2c3c(c1)CCc1cccc(c1-3)CC2	1.23093
1259	c1cc2c3c(ccc2c2c1CCCC2)CCCC3	1.19731
1260	c1cc2c3c(ccc4c3c1CCC4)CCC2	1.22451
1261	c1cc2c3c(cccc3c1)C1C2C2c3cccc4cccc(c34)C12	1.31337
1262	c1cc2c3c(cccc3c1)-c1nc(-c3cnccn3)nnc1-2	1.49401
1263	c1cc2c3c(cccc3c1)N1CCCN3CCCN2C31	1.28876
1264	c1cc2c3ccc4ccc5ccc6ccc7c(cccc7c6c5c4c3c1)OCCCCCCCCCCO2	1.25354
1265	c1cc2c3ccc4ccc5ccc6ccc7c(cccc7c6c5c4c3c1)OCCCCCCCCO2	1.28472
1266	c1cc2c3cccc(c3c1)OCCOCCOCCOc1cccc3c(cccc13)OCCOCCOCCO2	1.33367
1267	c1cc2cc(c1)[N][N]c1cccc(c1)Cc1cccc(c1)[N][N]c1cccc(c1)C2	1.2618
1268	c1cc2cc(c1)CN1CCOCCOCCN(CCOCCOCC1)C2	1.19258
1269	c1cc2cc(c1)COCOCc1cccc(c1)COCOC2	1.31692
1270	c1cc2cc3c(cc2c2cc4c(cc12)OCO4)OCO3	1.52951
1271	c1cc2ccc1COCc1ccc(cc1)COCc1ccc(cc1)COCc1ccc(cc1)COC2	1.23522
1272	c1cc2ccc1COCOCc1ccc(cc1)COCOC2	1.3069
1273	c1cc2ccc3[nH]c4ccc5cccc6c(c1)c2c3c4c56	1.43281
1274	c1cc2ccc3cc4[nH]ccc4c4ccc(c1)c2c34	1.34589
1275	c1cc2ccc3ccc(-c4ccc(-c5ccc(-c6ccc7ccc8cccc9ccc6c7c89)cc5)cc4)c4ccc(c1)c2c34	1.36942
1276	c1cc2ccc3ccc4ccc5cccc6c(c1)c2c3c4c56	1.36117
1277	c1cc2ccc3cccc4c5nc6cc7nc8c9cccc%10ccc%11cccc(c8nc7cc6nc5c(c1)c2c34)c%11c%109	1.49654
1278	c1cc2cccc3c4cccc5cccc(c(c1)c23)c54	1.35661
1279	c1cc2n(c1)P1n3cccc3C2c2cccn21	1.39967
1280	c1cc2nc(c1)C1Oc3ccccc3OCCOCCOCCOc3ccccc3OC2Oc2ccccc2OCCOCCOCCOc2ccccc2O1	1.35933
1281	c1cc2nc(c1)COCCOCc1cccc(n1)COCCOC2	1.3435
1282	c1cc2oc1C1(CCCCC1)c1ccc(o1)C1(CCCCC1)c1ccc(o1)C1(CCCCC1)c1ccc(o1)C21CCCCC1	1.20196
1283	c1cc2oc1C1(CCCCCC1)c1ccc(o1)C1(CCCCCC1)c1ccc(o1)C1(CCCCCC1)c1ccc(o1)C21CCCCCC1	1.18358
1284	c1cc2oc1C1(CCCCCCC1)c1ccc(o1)C1(CCCCCCC1)c1ccc(o1)C1(CCCCCCC1)c1ccc(o1)C21CCCCCCC1	1.13618
1285	c1ccc([C]([C](c2ccccc2)c2ccccc2-c2ccccc2)c2ccccc2-c2ccccc2)cc1	1.16777
1286	c1ccc([C]([N][N][C](c2ccccc2)c2ccccc2)C2=C([C]([N]N=C(c3ccccc3)c3ccccc3)c3ccccc3)CCCC2)cc1	1.17885
1287	c1ccc([C]([N][N][C](c2ccccc2)c2ccncc2)c2ccncc2)cc1	1.29155
1288	c1ccc([C]([N][N][C](c2ccccn2)c2ccccn2)c2ccccn2)nc1	1.33838
1289	c1ccc([C]2[N]N[C](c3ccccn3)[N]N2)nc1	1.40641
1290	c1ccc([C]2[N]OC(c3ccccc3)(c3ccccc3)N2)cc1	1.2821
1291	c1ccc([C]2N=C(c3ccc(-n4c5ccccc5c5ccccc54)cc3)[N]c3ccccc32)cc1	1.28896
1292	c1ccc([N][N]c2ccccc2)cc1	1.21829
1293	c1ccc([N][N]c2ccccc2[N][N]c2ccccc2)cc1	1.263
1294	c1ccc([N][N]c2ncc[nH]2)cc1	1.27334
1295	c1ccc([N][PH](Nc2ccccn2)(Nc2ccccn2)Nc2ccccn2)nc1	1.28438
1296	c1ccc([N]c2ccc([N]c3ccccc3)cc2)cc1	1.24195
1297	c1ccc([Si](c2ccccc2)(c2ccccc2)c2ccc(-n3c4ccccc4c4ccccc43)cc2)cc1	1.2121
1298	c1ccc([Si](Cc2ccc3ccccc3c2)(Cc2ccc3ccccc3c2)c2ccccc2)cc1	1.20368
1299	c1ccc([Si](OC2CCC(O[Si](c3ccccc3)(c3ccccc3)c3ccccc3)CC2)(c2ccccc2)c2ccccc2)cc1	1.18571
1300	c1ccc([SiH]23(c4ccccc4)C[SiH]2(c2ccccc2)(c2ccccc2)C3)cc1	1.08519
1301	c1ccc(C(=C(c2c3ccccc3cc3ccccc23)c2c3ccccc3cc3ccccc23)c2ccccc2)cc1	1.22465
1302	c1ccc(C(=C(c2cccc3ccccc23)c2cccc3ccccc23)c2ccccc2)cc1	1.19147
1303	c1ccc(C(=C(c2ccccc2)c2cc3ccccc3cc2P(c2ccccc2)c2ccccc2)c2ccccc2)cc1	1.18683
1304	c1ccc(C(=NC(c2ccccc2)c2ccccc2)c2ccccc2)cc1	1.15699
1305	c1ccc(C(=Nc2cccc3c2-c2c(N=C(c4ccccc4)c4ccccc4)cccc2-3)c2ccccc2)cc1	1.22204
1306	c1ccc(C(=Nc2cccc3cc4cccc(N=C(c5ccccc5)c5ccccc5)c4cc23)c2ccccc2)cc1	1.23281
1307	c1ccc(C(c2c[nH]c3ccccc23)c2c[nH]c3ccccc23)cc1	1.2137
1308	c1ccc(C(Cn2cnnn2)c2ccccc2)cc1	1.21533
1309	c1ccc(C(N2CCOCC2)N2CCOCC2)nc1	1.22176
1310	c1ccc(C(Nc2ncccn2)Nc2ncccn2)nc1	1.30655
1311	c1ccc(C2(C3(c4ccccc4)OCCO3)OCCO2)cc1	1.33526
1312	c1ccc(C2(c3ccc(C4(c5ccccc5)C5CCC4CC5)cc3)C3CCC2CC3)cc1	1.18744
1313	c1ccc(C2(c3ccc4ccc5cccc6ccc3c4c56)c3ccccc3-c3ccccc32)cc1	1.29465
1314	c1ccc(C2(c3ccccc3)OCC3(CO2)COC(c2ccccc2)(c2ccccc2)OC3)cc1	1.25498
1315	c1ccc(C2(c3ccccc3)OCCOCCOCCO2)cc1	1.21622
1316	c1ccc(C2(c3ccccc3)OCCOCCOCCOCCO2)cc1	1.21206
1317	c1ccc(C2(c3ccccn3)NCCCN2)nc1	1.2644
1318	c1ccc(C2[C]3[N]OCC3CC2C2OCCO2)cc1	1.3021
1319	c1ccc(C2=C(c3cccc(-c4ccccn4)n3)[Si]3(CCCC3)C(c3cccc(-c4ccccn4)n3)=C2c2ccccc2)cc1	1.25528
1320	c1ccc(C2=C(c3ccccc3)C(=C(c3ccccc3)c3ccccc3)CC2)cc1	1.16556
1321	c1ccc(C2=C(c3ccccc3)C3(CCCCCC3)CC2)cc1	1.17366
1322	c1ccc(C2=C(c3ccccc3)c3ccccc3CCC2)cc1	1.19656
1323	c1ccc(C2=C3C(=Nc4ccccc43)N(C3CCCCC3)C2=NC2CCCCC2)cc1	1.18636
1324	c1ccc(C2=Nc3ccccc3CN2)cc1	1.25791
1325	c1ccc(C2=NCCc3cc4c(cc32)OCO4)cc1	1.33868
1326	c1ccc(C2=NCCCN=C2c2ccccc2)cc1	1.21123
1327	c1ccc(C2=NCCN2)cc1	1.24244
1328	c1ccc(C2=NN(c3ccccc3)c3ccccc3[N]2)cc1	1.32243
1329	c1ccc(C2=NN=C(c3ccccc3)CC(c3ccccc3)C2)cc1	1.20884
1330	c1ccc(C23C4C5C2C2C3C4C52C23C4C5C6C4C2C6C53)cc1	1.26811
1331	c1ccc(C23c4ccccc4-c4c2c2c(c5ccccc45)-c4ccccc4C2(c2ccccc2)c2ccccc23)cc1	1.26889
1332	c1ccc(C23CC(c4ccccc4O2)c2ccccc2O3)cc1	1.26411
1333	c1ccc(C23CC4CC(C2)CC(c2ccccc2)(C4)C3)cc1	1.17281
1334	c1ccc(C23OOC(c4ccccc4)(c4ccccc42)c2ccccc23)cc1	1.28761
1335	c1ccc(-c2c(-c3ccccc3)c(-c3ccccc3)c3c(-c4cccc(-c5c(-c6ccccc6)c(-c6ccccc6)c(-c6ccccc6)c6c(-c7ccccc7)c(-c7ccccc7)c(-c7ccccc7)c(-c7ccccc7)c56)c4)c(-c4ccccc4)c(-c4ccccc4)c(-c4ccccc4)c3c2-c2ccccc2)cc1	1.18443
1336	c1ccc(-c2c(-c3ccccc3)c(-c3ccccc3)c3cc4c(-c5ccccc5)c5cc6c(-c7ccccc7)c(-c7ccccc7)c(-c7ccccc7)c(-c7ccccc7)c6cc5c(-c5ccccc5)c4cc3c2-c2ccccc2)cc1	1.24061
1337	c1ccc(-c2c(-c3ccccc3)n3c(nc4c5ccccc5c5ccccc5c43)c3cc4ccccc4cc23)cc1	1.3585
1338	c1ccc(-c2c(-c3ccccc3)n3c(nc4c5ccccc5c5ccccc5c43)c3ccccc23)cc1	1.32336
1339	c1ccc(C2C(c3ccccn3)C(c3ccccn3)C2c2ccccn2)nc1	1.22582
1340	c1ccc(C2C(c3ccncc3)C(c3ccccc3)C2c2ccncc2)cc1	1.18995
1341	c1ccc(C2C(c3ccncc3)C(c3ccccn3)C2c2ccncc2)nc1	1.22695
1342	c1ccc(-c2c3c(cc4c2Cc2ccccc2-4)CC3)cc1	1.23248
1343	c1ccc(-c2c3c(cc4ccccc24)COC3)cc1	1.28943
1344	c1ccc(-c2c3c(cn4ccnc24)Cc2ccccc2-3)cc1	1.28565
1345	c1ccc(-c2c3c(nc4c2ccc2ccccc24)-c2ccccc2C3)cc1	1.27221
1346	c1ccc(-c2c3c(nc4ccc5nc6c(c(-c7ccccc7)c5c24)Cc2ccccc2-6)-c2ccccc2C3)cc1	1.27873
1347	c1ccc(-c2c3cc4c(-c5ccccn5)nnc(-c5ccccn5)c4cc3c(-c3ccccc3)c3c4cccc5ccc6cccc(c23)c6c54)cc1	1.3099
1348	c1ccc(C2c3ccccc3C(c3ccccc3)[Si]2(c2ccccc2)c2ccccc2)cc1	1.19361
1349	c1ccc(-c2c3ccccc3c(-c3ccccc3)c3c(-c4ccccc4)c4ccccc4c(-c4ccccc4)c23)cc1	1.26773
1350	c1ccc(-c2c3ccccc3c(-c3ccccc3)c3cc4c(-c5ccccc5)c5ccccc5c(-c5ccccc5)c4cc23)cc1	1.20049
1351	c1ccc(-c2cc(-c3c(-c4ccccc4)n[nH]c3-c3ccccc3)c(-c3ccccc3)nn2)cc1	1.24119
1352	c1ccc(-c2cc(-c3c4ccccc4cc4ccccc34)cc(-c3ccccn3)n2)cc1	1.25382
1353	c1ccc(-c2cc(-c3ccc(-n4cccn4)cc3)cc(-c3ccccn3)n2)cc1	1.31459
1354	c1ccc(-c2cc(-c3ccc(-n4ccnc4)cc3)cc(-c3ccccc3)n2)cc1	1.25153
1355	c1ccc(-c2cc(-c3ccccc3)c3c([nH]c4ccccc43)c2-c2ccccc2)cc1	1.23546
1356	c1ccc(-c2cc(-c3ccccc3)c3c(c2)-c2ccccc2[Si]3(c2ccccc2)c2ccccc2)cc1	1.19523
1357	c1ccc(-c2cc(-c3ccccc3)c3c4ccccc4n(-c4ncccn4)c3c2)cc1	1.25999
1358	c1ccc(-c2cc(-c3ccccc3)c3c4ccccc4nc-3o2)cc1	1.28987
1359	c1ccc(-c2cc(-c3ccccc3)cc(-c3ccccc3)c2)cc1	1.20488
1360	c1ccc(-c2cc(-c3ccccc3)nc(-c3ccccc3)c2)cc1	1.23837
1361	c1ccc(-c2cc(-c3ccccn3)[nH]n2)cc1	1.3226
1362	c1ccc(-c2cc(-c3ccccn3)[nH]n2)nc1	1.34537
1363	c1ccc(-c2cc(-c3ccncc3)cc(-c3ccccn3)n2)nc1	1.32611
1364	c1ccc(-c2cc(-c3ccncc3)n[nH]2)nc1	1.37467
1365	c1ccc(-c2cc3[nH]c4ccccc4c3nc2-c2ccccc2)cc1	1.22762
1366	c1ccc(-c2cc3c(ccc4c5cc(-c6ccccc6)oc5ccc34)o2)cc1	1.32484
1367	c1ccc(-c2cc3c(oc4ccccc43)c(-c3ccccc3)n2)cc1	1.32523
1368	c1ccc(-c2cc3ccccc3c3ccnn23)cc1	1.32369
1369	c1ccc(-c2cc3nc4c5cccc6c7nc8cc(-c9ccccc9)c(-c9ccccc9)cc8nc7c7cccc(c4nc3cc2-c2ccccc2)c7c56)cc1	1.30445
1370	c1ccc(-c2ccc(C34C5C6C3C3C4C5C63c3ccc4ccccc4c3)cc2)cc1	1.27469
1371	c1ccc(-c2ccc(C34C5C6C7C5C3C7C64)cc2)cc1	1.27001
1372	c1ccc(-c2ccc(-c3cc(-c4ccccn4)nc(-c4ccccn4)c3)cc2)nc1	1.29656
1373	c1ccc(-c2ccc(-c3ccc(-c4ccccc4)cc3-c3nnc(-c4ccccc4)o3)c(-c3nnc(-c4ccccc4)o3)c2)cc1	1.3115
1374	c1ccc(C2CCC(c3ccccc3)CC2)cc1	1.15249
1375	c1ccc(-c2ccc(-c3ccccc3)nn2)cc1	1.30876
1376	c1ccc(-c2ccc(-c3ccccn3)nn2)nc1	1.34655
1377	c1ccc(-c2ccc3[nH]ncc3c2)cc1	1.28955
1378	c1ccc(-c2ccc3c(c2)C2(CCCC2)c2cc(-c4ccccc4)ccc2-3)cc1	1.1947
1379	c1ccc(-c2ccc3cc(-c4cccc5ccccc45)ccc3n2)cc1	1.27359
1380	c1ccc(-c2ccc3oc4ccc5c(-c6ccccc6)ccc6oc7ccc2c3c7-c4c65)cc1	1.41221
1381	c1ccc(C2CCCC(c3ccccc3)N2)cc1	1.13564
1382	c1ccc(-c2cccc(-c3nccnc3-c3ccccn3)n2)nc1	1.33082
1383	c1ccc(-c2cccc3c4ccccc4n(-c4ccccn4)c23)cc1	1.29799
1384	c1ccc(-c2ccccc2-c2nc3ccccc3n2-c2ccccc2)cc1	1.23415
1385	c1ccc(-c2ccn(Cc3c(Cn4ccc(-c5ccccn5)n4)c(Cn4ccc(-c5ccccn5)n4)c(Cn4ccc(-c5ccccn5)n4)c(Cn4ccc(-c5ccccn5)n4)c3Cn3ccc(-c4ccccn4)n3)n2)nc1	1.34059
1386	c1ccc(-c2ccn(Cc3cccc4c(Cn5ccc(-c6ccccn6)n5)cccc34)n2)nc1	1.32365
1387	c1ccc(-c2cn(-c3cccc4ccccc34)nn2)nc1	1.32951
1388	c1ccc(-c2cn(Cc3ccccn3)nn2)cc1	1.29781
1389	c1ccc(C2CN(CN3COC(c4ccccc4)C3)CO2)cc1	1.26789
1390	c1ccc(-c2cnc(-c3ccccc3)c(-c3ccccc3)n2)cc1	1.25908
1391	c1ccc(-c2cnc(-c3ccccc3)cn2)cc1	1.29073
1392	c1ccc(C2N=C(c3cccc(C4=NC(c5ccccc5)C(c5ccccc5)O4)n3)OC2c2ccccc2)cc1	1.2496
1393	c1ccc(-c2nc(-c3ccc(N4CCOCCOCCOCCOCC4)cc3)[nH]c2-c2ccccc2)cc1	1.10953
1394	c1ccc(C2NC(c3ccc4c(c3)OCO4)Oc3ccc4ccccc4c32)cc1	1.39508
1395	c1ccc(-c2nc(-c3ccccc3)c(-c3ccccc3)[nH]2)cc1	1.24704
1396	c1ccc(-c2nc(-c3ccccc3)c3ccccc3n2)cc1	1.2975
1397	c1ccc(-c2nc[nH]c2-c2ccccc2)cc1	1.21194
1398	c1ccc(-c2nc3c4ccccc4ncn3c2-c2ccccc2)cc1	1.28156
1399	c1ccc(-c2nc3cc4[nH]cnc4cc3[nH]2)nc1	1.36698
1400	c1ccc(-c2nc3cc4nc(-c5ccccn5)c(-c5ccccn5)nc4cc3nc2-c2ccccn2)nc1	1.3723
1401	c1ccc(-c2nc3ccccc3n2-c2ccc(-n3c4ccccc4c4cc5c(cc43)c3ccccc3n5-c3ccc(-n4c(-c5ccccc5)nc5ccccc54)cc3)cc2)cc1	1.29194
1402	c1ccc(-c2nc3ccccc3n2CCCCCCn2c3ccccc3c3ccccc32)cc1	1.21398
1403	c1ccc(-c2nc3ccccc3n2CCCCn2c(-c3ccccn3)nc3ccccc32)nc1	1.31289
1404	c1ccc(-c2ncc3ccccn23)nc1	1.3489
1405	c1ccc(-c2ncccc2-c2nnc(-c3ccc(N(c4ccccc4)c4ccccc4)cc3)o2)cc1	1.2866
1406	c1ccc(-c2nccn2CCCCn2ccnc2-c2ccccn2)nc1	1.29913
1407	c1ccc(-c2nccnc2-c2cccc(-c3cccc(-c4nccnc4-c4ccccn4)n3)n2)nc1	1.34937
1408	c1ccc(-c2nn3c(-c4ccccc4)ncc3o2)cc1	1.35122
1409	c1ccc(-c2nnc(C3CC3)[nH]2)cc1	1.28704
1410	c1ccc(-c2nnc(-c3ccc([Si](c4ccccc4)(c4ccccc4)c4ccccc4)cc3)o2)cc1	1.23855
1411	c1ccc(-c2nnc(-c3ccc(-c4cc(-c5ccccc5)c(-c5ccccc5)c(-c5ccccc5)c4-c4ccccc4)cc3)o2)cc1	1.19338
1412	c1ccc(-c2nnc(-c3ccccc3-c3ccccc3-c3nnc(-c4ccccc4)o3)o2)cc1	1.35723
1413	c1ccc(-c2nnc(-c3ccccc3-c3nnc(-c4ccccc4)o3)o2)cc1	1.30029
1414	c1ccc(-c2nnc(-c3ccccc3-n3c4ccccc4c4ccccc43)n2-c2ccccc2)cc1	1.25728
1415	c1ccc(-c2nnc(-c3ccccn3)nc2-c2ccccc2)cc1	1.35116
1416	c1ccc(-c2nnc(-c3cccnc3)n2-c2ccccn2)nc1	1.41153
1417	c1ccc(-c2nnc(-c3cccnc3)nc2-c2ccccc2)cc1	1.3278
1418	c1ccc(-c2nnc(-c3cnccn3)nc2-c2ccccc2)cc1	1.35942
1419	c1ccc(-c2nnc3c4ccccc4c4nnc(-c5ccccn5)n4n23)nc1	1.45162
1420	c1ccc(-c2nnn(Cn3nnc(-c4ccccc4)n3)n2)cc1	1.39562
1421	c1ccc(-c2noc(Cn3nnc4ccccc43)n2)cc1	1.40195
1422	c1ccc(-c2oc(-c3ccccc3)c(-c3ccccc3)c3cccc2-3)cc1	1.25027
1423	C1CCC(C2OC(C3CCCCC3)OC(C3CCCCC3)O2)CC1	1.14841
1424	c1ccc(-c2oc3ccccc3c3c(-c4ccccc4)c4ccccc4c2-3)cc1	1.30376
1425	c1ccc(C2OCC3(CO2)COC(c2ccccc2)OC3)cc1	1.27183
1426	c1ccc(CC(=Nc2ccccc2)c2ccccc2)cc1	1.21913
1427	c1ccc(CC2(CC3(Cc4ccccc4)c4ccccc4-c4ccccc43)c3ccccc3-c3ccccc32)cc1	1.18095
1428	c1ccc(Cc2c(-c3ccccc3)n[nH]c2-c2ccccc2)cc1	1.21121
1429	c1ccc(Cc2c3ccccc3nc3ccccc23)cc1	1.25177
1430	c1ccc(Cc2cc(-c3ccccc3)n[nH]2)cc1	1.20975
1431	c1ccc(Cc2cc3ccccc3nc2-c2ccccc2)cc1	1.21729
1432	c1ccc(Cc2ccc(Cc3ccccc3)cc2)cc1	1.1743
1433	c1ccc(CC2COC(c3c4ccccc4cc4ccccc34)N2Cc2ccccc2)cc1	1.24577
1434	c1ccc(Cc2nc(N3CCCC3)cc3ccccc23)cc1	1.21181
1435	c1ccc(CCCCc2ccccc2)cc1	1.08941
1436	c1ccc(CCOc2ccc(OCCc3ccccc3)cc2)cc1	1.20084
1437	c1ccc(CN(c2ccccn2)p2oc3ccc4ccccc4c3c3c(ccc4ccccc43)o2)cc1	1.31688
1438	C1CCC(CN(CC2CCCCC2)CC2CCCCC2)CC1	0.998413
1439	c1ccc(CN(Cc2ccccn2)Cc2c3ccccc3cc3ccccc23)nc1	1.19975
1440	c1ccc(CN(CCCN(Cc2ccccn2)Cc2ccccn2)Cc2ccccn2)nc1	1.20064
1441	c1ccc(CN(CCN(Cc2ccccc2)Cc2ccccc2)Cc2ccccc2)cc1	1.13444
1442	c1ccc(CN(CCN(Cc2ccccn2)Cc2ccccn2)Cc2ccccn2)nc1	1.17809
1443	c1ccc(CN(P(c2ccccc2)c2ccccc2)P(c2ccccc2)c2ccccc2)cc1	1.24826
1444	c1ccc(Cn2c(-c3ccccc3)nc(-c3ccccc3)c2-c2ccccc2)cc1	1.17867
1445	c1ccc(Cn2c(-c3ccccc3)nc3ccccc32)cc1	1.21992
1446	c1ccc(Cn2c3ccccc3c3ccccc32)nc1	1.24161
1447	c1ccc(Cn2cc(-c3cccc(-c4cn(Cc5ccccc5)nn4)n3)nn2)cc1	1.31279
1448	c1ccc(Cn2cc(-c3cccc4ccccc34)nn2)cc1	1.25727
1449	c1ccc(Cn2cc(-c3ccccc3)nc2-c2ccccc2)cc1	1.23172
1450	c1ccc(Cn2cc(P(c3ccccc3)c3ccccc3)nn2)cc1	1.24181
1451	c1ccc(Cn2cccc2)c(Cn2cccc2)c1	1.16146
1452	c1ccc(CN2CCCN(Cc3ccccc3)C2c2ccccc2)cc1	1.13728
1453	c1ccc(CN2CCN(Cc3ccccc3)C2c2ccccc2)cc1	1.14895
1454	c1ccc(CN2CCN(Cc3ccccc3)CC2)cc1	1.15167
1455	c1ccc(CN2CCN(Cc3ccccc3)CCN(Cc3ccccc3)CCN(Cc3ccccc3)CC2)cc1	1.14764
1456	c1ccc(CN2CCOC2=Nc2ccccc2)cc1	1.22902
1457	c1ccc(Cn2cnc3ccccc32)cc1	1.27095
1458	c1ccc(CN2COc3ccc4ccccc4c3C2)cc1	1.28327
1459	c1ccc(Cn2nncc2-c2ccccc2)cc1	1.23195
1460	c1ccc(CNc2ccc(NCc3ccccc3)cc2)cc1	1.22135
1461	c1ccc(CNc2cccc(Nc3cccc(NCc4ccccc4)n3)n2)cc1	1.22262
1462	c1ccc(CNc2cccc(NCc3ccccc3)n2)cc1	1.20725
1463	c1ccc(COC(CP(c2ccccc2)c2ccccc2)C(CP(c2ccccc2)c2ccccc2)OCc2ccccc2)cc1	1.19738
1464	c1ccc(COc2cc(Cn3nnc4ccccc43)cc(Cn3nnc4ccccc43)c2)cc1	1.32793
1465	c1ccc(COc2ccc(OCc3ccccc3)cc2)cc1	1.24813
1466	c1ccc(COc2cccc3ccccc23)cc1	1.20768
1467	c1ccc(COc2ccccc2-c2nc3ccccc3[nH]2)cc1	1.26688
1468	c1ccc(COc2ccccc2-c2nc3ccccc3n2Cc2ccccc2)cc1	1.22734
1469	c1ccc(COn2nnc3cccnc32)cc1	1.32381
1470	c1ccc(N(c2cc(-c3ccccn3)nc(-c3ccccn3)c2)c2cc(-c3ccccn3)nc(-c3ccccn3)c2)cc1	1.26966
1471	c1ccc(N(c2ccc(C(c3ccc(N(c4ccccn4)c4ccccn4)cc3)(c3ccc(N(c4ccccn4)c4ccccn4)cc3)c3ccc(N(c4ccccn4)c4ccccn4)cc3)cc2)c2ccccn2)nc1	1.33191
1472	c1ccc(N(c2ccc(C34c5ccccc5-c5cccc(c53)-c3ccccc34)cc2)c2ccc(C34c5ccccc5-c5cccc(c53)-c3ccccc34)cc2)cc1	1.2773
1473	c1ccc(N(c2ccc(-c3ccc(N(c4ccccc4)c4cccc5ccccc45)cc3)cc2)c2cccc3ccccc23)cc1	1.22223
1474	c1ccc(N(c2ccc(N(c3ccccn3)c3ccccn3)cc2)c2ccccn2)nc1	1.29057
1475	c1ccc(N(c2ccccc2)c2ccc(-c3ccc4ccc5cccc6ccc3c4c56)cc2)cc1	1.2403
1476	c1ccc(N(c2ccccc2)c2ccc(-c3nc4c5ccccc5c5ccccc5c4n3-c3ccccc3)cc2)cc1	1.25833
1477	c1ccc(N(c2ccccc2)c2ccc(-c3nnc(-c4ccncc4)o3)cc2)cc1	1.33454
1478	c1ccc(N(c2ccccc2)c2ccc(N(c3ccccc3)c3ccccc3)cc2)cc1	1.21082
1479	c1ccc(N(c2ccccc2)c2ccc3ccccn23)cc1	1.21912
1480	c1ccc(N(c2ccccc2)c2ccccc2-c2cccc(-c3nnc(-c4cccc(-c5ccccc5N(c5ccccc5)c5ccccc5)c4)o3)c2)cc1	1.24507
1481	c1ccc(N(c2ccccn2)c2c3ccccc3cc3ccccc23)nc1	1.34202
1482	c1ccc(N(c2ccccn2)c2cccc3ccccc23)nc1	1.29125
1483	c1ccc(N(c2ccccn2)c2ccccn2)cc1	1.26662
1484	c1ccc(N(Cc2ccccn2)Cc2ccccn2)cc1	1.23919
1485	c1ccc(N(Nc2ccccn2)c2cccc3ccccc23)cc1	1.25432
1486	c1ccc(N=C(c2ccccc2)c2c3c(cc4ccccc24)COC3)cc1	1.26604
1487	c1ccc(N=C(N2CCOCC2)n2c(-c3ccccc3)cc3ccccc32)cc1	1.20684
1488	c1ccc(N=C(O[N][C](c2ccccc2)c2ccccc2)c2ccccc2)cc1	1.26872
1489	c1ccc(N=C2C(c3ccccc3)=C(c3ccccc3)c3ccccc32)cc1	1.23608
1490	c1ccc(N=C2c3ccccc3CN2c2ccccn2)nc1	1.34091
1491	c1ccc(N=c2ccc3nn4ccccc4nc-3c2)cc1	1.41215
1492	c1ccc(N=c2oc(-c3ccccc3)cc3ccccc23)cc1	1.27057
1493	c1ccc(-n2c(-c3ccccc3-n3c4ccccc4c4ccccc43)nnc2-c2ccccc2-n2c3ccccc3c3ccccc32)cc1	1.27722
1494	c1ccc(-n2c(-c3ccccn3)nnc2-c2ccccn2)cc1	1.37532
1495	c1ccc(-n2c3cc(-n4c5ccccc5c5ccccc54)ccc3c3ccc(-n4c5ccccc5c5ccccc54)cc32)cc1	1.25318
1496	c1ccc(-n2c3ccc4oc5ccccc5c4c3c3c4c(ccc32)oc2ccccc24)cc1	1.37462
1497	c1ccc(-n2c3ccccc3c3ccccc32)c(-c2ccccc2-n2c3ccccc3c3ccccc32)c1	1.2742
1498	c1ccc(N2c3ccccc3Oc3ccccc32)cc1	1.31786
1499	c1ccc(N2CCN(CC(CN3CCN(c4ccccc4)CC3)(CN3CCN(c4ccccc4)CC3)CN3CCN(c4ccccc4)CC3)CC2)cc1	1.1644
1500	c1ccc(N2CCN(CN3CCN(c4ccccc4)CC3)CC2)cc1	1.16152
1501	c1ccc(-n2cnnc2-c2ccncc2)cc1	1.37943
1502	c1ccc(-n2cnnn2)cc1	1.36498
1503	c1ccc(N2CP3CN(c4ccccc4)P2N(c2ccccc2)C3)cc1	1.31526
1504	c1ccc(-n2nnc3ccccc32)cc1	1.34801
1505	c1ccc(-n2nnnc2CN2CCCCC2)cc1	1.2596
1506	c1ccc(Nc2c3ccccc3c(Nc3ccccc3)c3ccccc23)cc1	1.28219
1507	c1ccc(Nc2c3ccccc3nc3ccccc23)cc1	1.27757
1508	c1ccc(Nc2ccc(-c3ccc(Nc4ccccn4)cc3)cc2)nc1	1.3033
1509	c1ccc(Nc2ccc(Cc3ccc(Nc4ccccn4)cc3)cc2)nc1	1.27186
1510	c1ccc(Nc2ccc(-n3cccn3)nn2)cc1	1.35948
1511	c1ccc(Nc2ccc(Nc3ccccc3)cc2)cc1	1.29247
1512	c1ccc(Nc2ccc(Oc3ccc(Nc4ccccn4)cc3)cc2)nc1	1.31723
1513	c1ccc(Nc2ccc3ccccc3c2-c2c(Nc3ccccn3)ccc3ccccc23)nc1	1.29788
1514	c1ccc(Nc2cccc(Cc3cccc(Nc4ccccn4)c3)c2)nc1	1.23987
1515	c1ccc(Nc2cccc(Nc3ccccn3)c2)nc1	1.32088
1516	c1ccc(Nc2cccc(Nc3ccncc3)n2)nc1	1.34857
1517	c1ccc(Nc2ccccn2)nc1	1.27636
1518	c1ccc(Nc2nnc(Nc3ccccn3)c3ccccc23)nc1	1.37156
1519	C1CCC(Nc2nnnn2C2CCCCC2)CC1	1.17944
1520	c1ccc(NCc2ccc(CNc3ccccn3)cc2)nc1	1.27112
1521	c1ccc(NCc2ccccc2P(c2ccccc2)c2ccccc2)cc1	1.22522
1522	c1ccc(NCCNc2ccccc2)cc1	1.20515
1523	c1ccc(NCNc2ccccn2)nc1	1.28504
1524	c1ccc(OC2(Oc3ccccc3)Oc3ccccc3O2)cc1	1.36252
1525	c1ccc(Oc2ccc(-c3ccnc4c(-c5ccc(Oc6ccccc6)cc5)ccnc34)cc2)cc1	1.31819
1526	c1ccc(P(c2ccccc2)c2ccc3c(c2-c2c(P(c4ccccc4)c4ccccc4)ccc4c2OCO4)OCO3)cc1	1.30421
1527	c1ccc(P(c2ccccc2)c2ccc3ccccc3c2-c2c(P(c3ccccc3)c3ccccc3)ccc3ccccc23)cc1	1.25855
1528	c1ccc(P(c2ccccc2)c2cccc3c2OC24Oc5c(cccc5P(c5ccccc5)c5ccccc5)CC2CCCC4C3)cc1	1.23281
1529	c1ccc(P(c2ccccc2)c2cccc3ccccc23)cc1	1.23114
1530	c1ccc(P(c2ccccc2)c2ccnc3cccnc23)cc1	1.26857
1531	c1ccc(P(c2ccccc2)N(C[PH]([N]c2ccccn2)(c2ccccc2)c2ccccc2)c2ccccn2)cc1	1.23233
1532	c1ccc(P(c2ccccc2CN2CCOCC2)c2ccccc2CN2CCOCC2)cc1	1.22088
1533	c1ccc(P(CC[Si](CCP(c2ccccc2)c2ccccc2)(CCP(c2ccccc2)c2ccccc2)CCP(c2ccccc2)c2ccccc2)c2ccccc2)cc1	1.21366
1534	c1ccc(P(Cc2ccc(C(c3ccccc3)(c3ccccc3)c3ccc(CP(c4ccccc4)c4ccccc4)[nH]3)[nH]2)c2ccccc2)cc1	1.19472
1535	c1ccc(P(CCOc2c3cccc2Cc2cccc(c2OCCP(c2ccccc2)c2ccccc2)Cc2cccc(c2OCCP(c2ccccc2)c2ccccc2)Cc2cccc(c2OCCP(c2ccccc2)c2ccccc2)C3)c2ccccc2)cc1	1.22258
1536	c1ccc(P(CNc2cccc3cccnc23)c2ccccc2)cc1	1.23538
1537	c1ccc(P(N2CCCCC2)N(C2CCCCC2)C2CCCCC2)cc1	1.13064
1538	c1ccc(-p2c3ccccc3c3ccccc32)cc1	1.25701
1539	c1ccc(P2CCP(c3ccccc3)CC2)cc1	1.27275
1540	C1CCC2(C1)OCC1(CO2)COC2(CCCC2)OC1	1.20561
1541	C1CCC2(CC1)OCC1(CO2)COC2(CCCCC2)OC1	1.23587
1542	c1ccc2[nH]c(C3CC3)nc2c1	1.18243
1543	c1ccc2[nH]c(-c3ccc(-n4cncn4)cc3)nc2c1	1.38573
1544	c1ccc2[nH]c(-c3ccc4c(c3)OCO4)nc2c1	1.39702
1545	c1ccc2[nH]c(CCc3nc4ccccc4[nH]3)nc2c1	1.35577
1546	c1ccc2[nH]c(CCCCc3nc4ccccc4[nH]3)nc2c1	1.30874
1547	c1ccc2[nH]c(CCn3nnc4ccccc43)nc2c1	1.34368
1548	c1ccc2[nH]c(Cn3ccnc3)nc2c1	1.26216
1549	c1ccc2[nH]cnc2c1	1.27046
1550	c1ccc2[nH]nnc2c1	1.32762
1551	c1ccc2c(c1)[N]C1=C2[N]c2ccccc21	1.3521
1552	c1ccc2c(c1)[nH]c1c(-n3c4ccccc4c4ccccc43)cccc12	1.27914
1553	c1ccc2c(c1)[nH]c1c3[nH]c4ccccc4c3c3ccccc3c21	1.39027
1554	c1ccc2c(c1)[nH]c1cc3c(cc12)[nH]c1ccccc13	1.43554
1555	c1ccc2c(c1)[nH]c1cc3oc4ccccc4c3cc12	1.40577
1556	c1ccc2c(c1)[nH]c1cccc(OCC3CO3)c12	1.30841
1557	c1ccc2c(c1)C(=C(c1cccc3ccccc13)c1cccc3ccccc13)c1ccccc1-2	1.25329
1558	c1ccc2c(c1)C1=N[N]N(CCCCCCn3nnc(n3)-c3ccccc3C3=N[N]N(CCCCCCn4nnc-2n4)[N]3)[N]1	1.36614
1559	c1ccc2c(c1)C13CCC14c1ccccc1C1(CCC21c1ccccc13)c1ccccc14	1.33811
1560	c1ccc2c(c1)c1c3c4ccccc4n4c5ccccc5c(c5c6ccccc6n2c15)c34	1.41582
1561	c1ccc2c(c1)-c1c3ccc(c1-2)CCc1ccc(c2c1-c1ccccc1-2)CC3	1.23713
1562	c1ccc2c(c1)C1CCC2c2ccccc21	1.22884
1563	c1ccc2c(c1)-c1ccc3c4ccc5c6c(ccc(c7ccc-2c1c37)c64)-c1ccccc1-5	1.35437
1564	c1ccc2c(c1)c1cccc3c4cccc5c6cccc7c8ccccc8c8cc2c(c13)c(c45)c8c76	1.45173
1565	c1ccc2c(c1)c1ccccc1c1c2c2c3ccccc3c3ccccc3c2c2c3ccccc3c3ccccc3c12	1.32317
1566	c1ccc2c(c1)c1ccccc1c1ccccc21	1.32399
1567	c1ccc2c(c1)-c1ccccc1C21c2cccnc2-c2ncccc21	1.25694
1568	c1ccc2c(c1)-c1ccccc1C21OC2(c3ccccc3-c3ccccc32)c2ccccc2-c2ccccc21	1.25756
1569	c1ccc2c(c1)c1ccccc1n2-c1ccc([Si](c2ccc(-n3c4ccccc4c4ccccc43)cc2)(c2ccc(-n3c4ccccc4c4ccccc43)cc2)c2ccc(-n3c4ccccc4c4ccccc43)cc2)cc1	1.27938
1570	c1ccc2c(c1)c1ccccc1n2-c1ccc(-c2ccc(-n3c4ccccc4c4ccccc43)cn2)nc1	1.32034
1571	c1ccc2c(c1)-c1nc-2nc2[nH]c(nc3nc(nc4[nH]c(n1)c1ccccc41)-c1ccccc1-3)c1ccccc21	1.44568
1572	c1ccc2c(c1)-c1nc3ccccc3nc1-c1ccccc1N2c1c2ccccc2cc2ccccc12	1.31675
1573	c1ccc2c(c1)-c1nc3ccccc3nc1-c1ccccc1N2c1ccc(-c2ccc(N3c4ccccc4-c4nc5ccccc5nc4-c4ccccc43)cc2)cc1	1.285
1574	c1ccc2c(c1)CC(=C1Cc3ccccc3C1)C2	1.22331
1575	c1ccc2c(c1)CC(=C1CCc3ccccc31)C2	1.19927
1576	c1ccc2c(c1)Cc1ccc(C3c4ccccc4-c4ccccc43)cc1-2	1.25077
1577	c1ccc2c(c1)Cc1cccc3c1-c1c(ccc4cccc-2c14)C3	1.27087
1578	c1ccc2c(c1)CC2=C1Cc2ccccc21	1.20419
1579	c1ccc2c(c1)CCc1c(-c3ccncc3)n[nH]c1-2	1.30887
1580	c1ccc2c(c1)ccc1c2ccc2c3ccccc3ccc21	1.3096
1581	c1ccc2c(c1)ccc1c3ccc4ccccc4c3oc21	1.38391
1582	c1ccc2c(c1)ccc1cc3c(cc12)COC3	1.26997
1583	c1ccc2c(c1)ccc1ccccc12	1.22082
1584	c1ccc2c(c1)CCc1cncnc1-2	1.32642
1585	c1ccc2c(c1)ccc1op(N3CCCC4CCCCC43)oc3ccc4ccccc4c3c12	1.27255
1586	c1ccc2c(c1)CCCCC2=C1CCCCc2ccccc21	1.18689
1587	c1ccc2c(c1)ccn2Cc1ccc(C2=NCCO2)cc1	1.26046
1588	c1ccc2c(c1)CN(c1ccc(N3COc4ccccc4C3)cc1)CO2	1.36673
1589	c1ccc2c(c1)COc1nc3c(cc1-2)CCC3	1.30621
1590	c1ccc2c(c1)nc(-c1ccncc1)n2CCCCn1c(-c2ccncc2)nc2ccccc21	1.28338
1591	c1ccc2c(c1)ncn2-c1c2ccccc2c(-n2cnc3ccccc32)c2ccccc12	1.37603
1592	c1ccc2c(c1)ncn2-c1ccc(-n2cnc3ccccc32)cc1	1.32776
1593	c1ccc2c(c1)ncn2CCCCn1cnc2ccccc21	1.27093
1594	c1ccc2c(c1)ncn2CCN1CCCCC1	1.15084
1595	c1ccc2c(c1)nnn2OCOn1nnc2ccccc21	1.45665
1596	c1ccc2c(c1)O[PH]1([N][PH]3([N][PH]4([N]1)Oc1ccccc1O4)Oc1ccccc1O3)O2	1.32923
1597	c1ccc2c(c1)OC1(c3ccccc3-2)C2CC3CC(C2)CC1C3	1.27258
1598	c1ccc2c(c1)Oc1ccccc1-c1ccccc1Oc1ccccc1-2	1.30364
1599	c1ccc2c(c1)Oc1ccccc1C21c2ccccc2-c2ccccc21	1.29194
1600	c1ccc2c(c1)oc1nccnc1oc1ccccc12	1.42497
1601	c1ccc2c(c1)OCC1(COc3ccccc3-2)CC12COc1ccccc1-c1ccccc1OC2	1.29731
1602	c1ccc2c(c1)OCCOc1ccccc1OCCOc1ccccc1OCCOc1ccccc1OCCO2	1.36854
1603	c1ccc2c(c1)OCCOCCNCCOCCO2	1.23607
1604	c1ccc2c(c1)OCCOCCOCCOc1ccccc1OCc1ccc(cc1)CO2	1.31209
1605	c1ccc2c(-c3c(NP(C4CCCCC4)C4CCCCC4)ccc4ccccc34)c(NP(C3CCCCC3)C3CCCCC3)ccc2c1	1.11246
1606	c1ccc2c(-c3c4ccccc4nc4ccccc34)c3ccccc3nc2c1	1.32198
1607	c1ccc2c(-c3ccc4c(c3)C3(CC3)c3cc(-c5cccc6ccccc56)ccc3-4)cccc2c1	1.25153
1608	c1ccc2c(-c3ccn(-c4ccc(-n5ccc(-c6c7ccccc7cc7ccccc67)n5)cc4)n3)c3ccccc3cc2c1	1.24144
1609	c1ccc2c(-c3ccn(Cc4ccc(Cn5ccc(-c6c7ccccc7cc7ccccc67)n5)cc4)n3)c3ccccc3cc2c1	1.2753
1610	c1ccc2c(-c3ccn(Cc4ccc(Cn5nccc5-c5c6ccccc6cc6ccccc56)cc4)n3)c3ccccc3cc2c1	1.17976
1611	c1ccc2c(-c3nc4c5cccnc5c5ncccc5c4[nH]3)cccc2c1	1.39484
1612	c1ccc2c(-c3nc4ccccc4[nH]3)c3ccccc3cc2c1	1.29696
1613	c1ccc2c(Cc3nc4ccccc4[nH]3)cccc2c1	1.22956
1614	c1ccc2c(CCCc3c4ccccc4cc4ccccc34)c3ccccc3cc2c1	1.21131
1615	c1ccc2c(CCCCc3c4ccccc4cc4ccccc34)c3ccccc3cc2c1	1.18727
1616	c1ccc2c(CN3CCCN(Cc4cccc5ccccc45)CCN(Cc4cccc5ccccc45)CCCN(Cc4cccc5ccccc45)CC3)cccc2c1	1.17015
1617	c1ccc2c(Cn3ccnc3)ccc(Cn3ccnc3)c2c1	1.31287
1618	c1ccc2c(CN3CCNCCN(Cc4cccc5ccccc45)CCNCC3)cccc2c1	1.17352
1619	c1ccc2c(CN3CCOCCN(Cc4cccc5ccccc45)CCOCC3)cccc2c1	1.22101
1620	c1ccc2c(CNC34CC5CC(CC(C5)C3)C4)c3ccccc3cc2c1	1.25298
1621	c1ccc2c(CNCCN(Cc3c[nH]c4ccccc34)Cc3c[nH]c4ccccc34)c[nH]c2c1	1.22853
1622	c1ccc2c(-n3cncn3)c3ccccc3cc2c1	1.37214
1623	c1ccc2c(Nc3cccc4ccccc34)cccc2c1	1.23335
1624	c1ccc2c3c(ccc2c1)Nc1ccc2ccccc2c1C3c1ccc2c(c1)OCO2	1.35104
1625	c1ccc2c3c4ccccc4c(c2c1)CCc1c2ccccc2c(c2ccccc12)CC3	1.32839
1626	c1ccc2c3ccc(c2c1)CCc1ccc(c2ccccc12)CC3	1.28548
1627	c1ccc2cc(C3C(c4ccncc4)C(c4ccc5ccccc5c4)C3c3ccncc3)ccc2c1	1.20029
1628	c1ccc2cc(-c3ccc4ccccc4c3)cc-2cc1	1.27215
1629	c1ccc2cc(-c3ccncn3)ccc2c1	1.32018
1630	c1ccc2cc(-c3nnc(-c4nnc(-c5ccc6ccccc6c5)o4)o3)ccc2c1	1.41995
1631	c1ccc2cc(Oc3cnc4ccccc4n3)ccc2c1	1.33119
1632	c1ccc2cc3[nH]cnc3cc2c1	1.34103
1633	c1ccc2cc3cc4cc5ccccc5cc4cc3cc2c1	1.34806
1634	c1ccc2nc(-c3cc4c5ccccc5c5cccc3n54)ccc2c1	1.37422
1635	c1ccc2nc(-c3ncc4ccc5ccccc5n34)ccc2c1	1.34942
1636	c1ccc2nc3c(cc2c1)CCCC3	1.22333
1637	c1ccc2nc3c(nc2c1)[nH]c1ccccc13	1.43956
1638	c1ccc2nc3c(nc2c1)-c1nc2ccccc2nc1-3	1.42757
1639	c1ccc2nc3ccccc3nc2c1	1.3079
1640	c1ccc2nn(CCCn3cc4ccccc4n3)cc2c1	1.24347
1641	c1ccc2nn(CCn3cc4ccccc4n3)cc2c1	1.31728
1642	c1ccc2nn(CCNCCn3nnc4ccccc43)nc2c1	1.33849
1643	c1ccc2oc(-c3cc4ccccc4o3)cc2c1	1.38804
1644	c1ccc2oc(-c3nc4ccccc4o3)nc2c1	1.45882
1645	C1CCC2OCCOCCOC3CCCCC3OCCOCCOC2C1	1.2274
1646	C1CCCCCC2(CCCCC1)OOC1(CCCCCCCCCCC1)OOC1(CCCCCCC1)OO2	1.13108
1647	C1CCN([PH]23[N][PH](N4CCCC4)([N][PH](N4CCCC4)(N4CCCC4)[N]2)OCCOCCOCCOCCO3)C1	1.31416
1648	c1ccncc1	1.177
1649	c1cn(-c2ccc(-c3nnn[nH]3)cc2)cn1	1.49013
1650	c1cn(-c2ccc(-n3ccnc3)nn2)cn1	1.49974
1651	c1cn(Cn2ccnc2)cn1	1.33069
1652	c1cnc(CN(Cc2cnccn2)C2CCCCC2N(Cc2cnccn2)Cc2cnccn2)cn1	1.29019
1653	c1cnc(-n2cnnc2)nc1	1.48878
1654	c1cnc(Nc2cnccn2)cn1	1.46446
1655	c1cnc(NCCCCCNc2ncccn2)nc1	1.25787
1656	c1cnc(Oc2ccc(Oc3cnccn3)cc2)cn1	1.45739
1657	c1cnc2[nH]c(-c3ccncc3)cc2c1	1.36727
1658	c1cnc2c(c1)c1nc[nH]c1c1cccnc12	1.49765
1659	c1cnc2c(c1)ccc1ncccc12	1.33091
1660	c1cnc2c(c1)n1c(C3CC3)nnc1c1nnc(C3CC3)n21	1.46748
1661	c1cnc2c(O[Si]3(Oc4cccc5cccnc45)CCCCC3)cccc2c1	1.30559
1662	c1cnc2c(O[Si]3(Oc4cccc5cccnc45)CCCCCC3)cccc2c1	1.3227
1663	c1cnc2cc3c(cc2n1)C1c2cc4nccnc4cc2C3c2cc3nccnc3cc21	1.42157
1664	c1cnc2ccc3ccc4ccc5ncccc5c4c3c2c1	1.35507
1665	c1cncc(-c2nc3ccccc3n2CCCCn2c(-c3cccnc3)nc3ccccc32)c1	1.3273
1666	c1cncc(Cn2c3ccccc3c3ccccc32)c1	1.24478
1667	C1CNCCN1	1.11355
1668	c1cnn(C(COCc2ccc(COCC(n3cccn3)(n3cccn3)n3cccn3)cc2)(n2cccn2)n2cccn2)c1	1.33636
1669	c1cnn(-c2cc(-n3cccn3)c(-n3cccn3)cc2-n2cccn2)c1	1.36727
1670	c1cnn(-c2cc(-n3cccn3)c(-n3cccn3)nn2)c1	1.42786
1671	c1cnn(-c2ccc(N3CCCCC3)nn2)c1	1.30188
1672	c1cnn(Cc2ccc(Cn3cccn3)cc2)c1	1.26329
1673	c1coc(-c2nc(-c3ccco3)c(-c3ccco3)[nH]2)c1	1.33772
1674	c1coc(-c2nc3c4cccnc4c4ncccc4c3nc2-c2ccco2)c1	1.44747
1675	C1COCc2c(c3c(c4c2CCCOC4)CCCOC3)C1	1.27194
1676	c1nc(-c2ccc(-c3c[nH]cn3)cc2)c[nH]1	1.30573
1677	c1nc[nH]n1	1.456
1678	c1ncn(Cc2ccc(-c3ccc(Cn4cncn4)cc3)cc2)n1	1.34181
1679	c1nncn1[N][N]n1cnnc1	1.61828
1680	C1NNCN2CNNCN12	1.37405
1681	c1nncnn1	1.501
1682	c1nnn[nH]1	1.529
1683	c1nnnn1[N][N]n1cnnn1	1.77302
1684	CC#CC1(O)CCC2C3CCC45CC6(CCC4(O5)C3=CCC21C)OCCO6	1.21287
1685	CC#Cc1cn(C2CC(O)C(CO)O2)c(=O)nc1N	1.39458
1686	CC#Cc1cn(C2CC(O)C(CO)O2)c2c1[C](N)N=C[N]2	1.44006
1687	CC#Cc1cn(C2CC(O)C(CO)O2)c2nc(N)[nH]c(=O)c12	1.42881
1688	CC#CCC(Cc1cn(Cc2ccccc2OC)c(C)c1C)(C(=O)OC)C(=O)OC	1.22086
1689	CC([N][N]c1cc(Cl)cc(Cl)c1O)=C(Cl)C(=O)OCCOCCOCCCl	1.50958
1690	CC([N]C=C[N]C(C)C(Cl)c1ccccc1)C(Cl)c1ccccc1	1.25159
1691	CC([N+](=O)[O-])C1(O)COC2C(O)COC21	1.53975
1692	CC(=C(C#N)C#N)c1cccc(N)c1	1.26543
1693	CC(=C(C)C(C(=O)OC(C)(C)C)C(C)C)C(Cc1ccccc1)NC(=O)OC(C)(C)C	1.04076
1694	CC(=C(c1ccccc1)c1cc2ccccc2cc1P(c1ccccc1)c1ccccc1)c1ccccc1	1.22704
1695	CC(=C(N)c1ccccc1)c1nc(-c2ccccc2)c(C)c(=O)o1	1.29998
1696	CC(=C(OCCCOc1ccc(Cl)cc1Cl)c1ccc(F)cc1F)n1cncn1	1.47375
1697	CC(=C1C(=O)Nc2ccccc21)c1ccccc1	1.27732
1698	CC(=C1C(=O)OC(=O)C1=Cc1ccc2c(c1)OCO2)c1ccccc1	1.39417
1699	CC(=C1C(=O)Oc2ccc(C)cc21)c1ccccc1	1.25219
1700	CC(=C1COCC1(O)c1cccc(Cl)c1)c1ccc(F)cc1	1.30169
1701	CC(=CC(=O)O)C(=O)O	1.44894
1702	CC(=CC(=O)O)CCC1(C)C(C)CCC2(C)C(C)=CCCC21	1.08251
1703	CC(=CC(CO)Cc1ccccc1)C(CC(C)C)NC(=O)OC(C)(C)C	1.04518
1704	CC(=CC(F)(F)F)C(=O)N1CCOC1=O	1.5591
1705	CC(=CC(O)C(C)O)C1CCC2C3=CC(=O)C4CC(=CCC(O)C4)C3CCC12C	1.16617
1706	CC(=Cc1ccc([N+](=O)[O-])cc1)C(=O)O	1.43495
1707	CC(=Cc1ccc(Br)cc1)[N+](=O)[O-]	1.71988
1708	CC(=Cc1ccc(C(C)C)cc1)C(=O)O	1.15582
1709	CC(=Cc1ccc(C)cc1)[N+](=O)[O-]	1.23851
1710	CC(=Cc1ccc(C=C(C)c2ccccc2)cc1)c1ccccc1	1.17672
1711	CC(=Cc1ccc(Cl)cc1)C(=O)O	1.39733
1712	CC(=Cc1ccc(Nc2ccc(C#N)cc2)cc1)c1ccccc1	1.21057
1713	CC(=Cc1ccc2c(c1)CCO2)[N+](=O)[O-]	1.31805
1714	CC(=Cc1cccc([N+](=O)[O-])c1)[N+](=O)[O-]	1.42354
1715	CC(=Cc1cccc(C)c1)C(=O)O	1.2196
1716	CC(=Cc1ccccc1)C(=O)C(C)=Cc1ccccc1	1.19828
1717	CC(=CC1CCCCC1)C(=O)c1ccc2ccccc2c1	1.1612
1718	CC(=Cc1ccccc1)c1ccc(Nc2ccc(C#N)cc2)cc1	1.22969
1719	CC(=Cc1ccccc1)c1ccc(Nc2ccc(C#N)cc2)cc1C	1.24407
1720	CC(=Cc1ccccc1)c1ccccc1C(C)=NO	1.16748
1721	CC(=Cc1ccccc1[N+](=O)[O-])[N+](=O)[O-]	1.4283
1722	CC(=Cc1cccnc1)C(=NO)c1ccccc1	1.21811
1723	CC(=CCCC1(C)c2c(c3c(C)cc(O)cc3oc2=O)OC1C)CO	1.27244
1724	CC(=CCOC(=O)c1ccc(Br)cc1)C1CC2C(=CCC3C(C)(C)CCCC23C)C(=O)O1	1.32741
1725	CC(=CI)CC(O)C(C)C=C(C)C(=O)N1C(=O)OCC1C(C)C	1.51458
1726	CC(=N)NNc1ccc(Cl)cc1Cl	1.43668
1727	CC(=N[N][C]([C]([N]N=C(C)c1ccccn1)c1ccccc1)c1ccccc1)c1ccccn1	1.17497
1728	CC(=NC#N)N(C)Cc1ccc(Cl)nc1	1.34032
1729	CC(=Nc1c(C(C)C)cccc1C(C)C)C(=O)C(C)=Nc1c(C(C)C)cccc1C(C)C	1.08637
1730	CC(=Nc1c(C(C)C)cccc1C(C)C)C(=O)c1ccccc1	1.11318
1731	CC(=Nc1c(C(C)C)cccc1C(C)C)c1ccc2cccc(C(C)=Nc3c(C(C)C)cccc3C(C)C)c2n1	1.06988
1732	CC(=Nc1c(C(C)C)cccc1C(C)C)N(C(C)=Nc1c(C(C)C)cccc1C(C)C)c1c(C(C)C)cccc1C(C)C	1.01176
1733	CC(=Nc1c(C)cc(C(C)(C)C)cc1C)C(C)=Nc1c(C)cc(C(C)(C)C)cc1C	1.05308
1734	CC(=Nc1c(C)cc(C)cc1C)c1ccc[nH]1	1.10764
1735	CC(=Nc1c(C)ccc2ccccc12)C(C)=Nc1c(C)ccc2ccccc12	1.15859
1736	CC(=Nc1c(C)cccc1C)C(=NO)C(C)=Nc1c(C)cccc1C	1.1408
1737	CC(=Nc1c(C)cccc1C)C(C)=Nc1c(C)cccc1C	1.11851
1738	CC(=Nc1c(C)cccc1C)c1cccc(C(C)=Nc2c(C)cccc2C)n1	1.12535
1739	CC(=Nc1c(C)cccc1C)c1cccc(-c2nc3ccccc3n2C)n1	1.21754
1740	CC(=Nc1c(-c2cc3ccccc3o2)cccc1-c1cc2ccccc2o1)C(C)=Nc1c(-c2cc3ccccc3o2)cccc1-c1cc2ccccc2o1	1.36321
1741	CC(=Nc1cc(C)cc(C)c1)c1ccc([N+](=O)[O-])cc1	1.22181
1742	CC(=Nc1cc(C)ccc1C)C(C)=Nc1cc(C)ccc1C	1.08834
1743	CC(=Nc1cc(C)ccc1C)c1ccc[nH]1	1.12147
1744	CC(=Nc1ccc(Br)cc1C)C(C)=Nc1ccc(Br)cc1C	1.60415
1745	CC(=Nc1ccc(C)c(C)c1)c1ccc[nH]1	1.13804
1746	CC(=Nc1ccc(C)cc1C)C(C)=Nc1ccc(C)cc1C	1.13446
1747	CC(=Nc1ccc(Cl)c(N)c1)c1cc(Br)ccc1O	1.66306
1748	CC(=Nc1ccc(F)cc1C(C)c1ccccc1)C(C)=Nc1ccc(F)cc1C(C)c1ccccc1	1.20005
1749	CC(=Nc1ccc(N=C(C)c2ccccc2)cc1)c1ccccc1	1.16387
1750	CC(=NC1CCC(N=C(C)c2ccccc2O)CC1)c1ccccc1O	1.25782
1751	CC(=Nc1ccc(O)cc1)c1ccncc1	1.26125
1752	CC(=Nc1ccc(Oc2cccc(N=C(C)c3ccccc3O)c2)cc1)c1ccccc1O	1.30012
1753	CC(=Nc1ccc2ccccc2c1)C(C)=Nc1ccc2ccccc2c1	1.27816
1754	CC(=Nc1cccc(Cl)c1C)C(C)=Nc1cccc(Cl)c1C	1.28922
1755	CC(=Nc1cccc(N)c1)c1ccccc1O	1.27875
1756	CC(=Nc1cccc(N)c1C)c1ccccc1O	1.2117
1757	CC(=Nc1ccccc1)c1ccc[nH]1	1.17887
1758	CC(=Nc1ccccc1)c1cccc(C(C)=Nc2ccccc2)n1	1.19824
1759	CC(=Nc1ccccc1)Nc1ccccc1	1.13688
1760	CC(=Nc1ccccc1C(C)C)c1cccc(C(C)=Nc2ccccc2C(C)C)n1	1.08655
1761	CC(=Nc1ccccc1C(F)(F)F)C(C)=Nc1ccccc1C(F)(F)F	1.41607
1762	CC(=Nc1ccccc1C)c1ccc[nH]1	1.18053
1763	CC(=NC1CCCCC1N=C(C)c1ccccc1O)c1ccccc1O	1.18932
1764	CC(=NCc1cccc2ccccc12)c1ccc2ccccc2c1	1.21983
1765	CC(=NCc1ccccc1)c1ccccc1NC(=O)c1ccccc1	1.24469
1766	CC(=NCCN=C(C)c1cc(C)ccc1O)c1cc(C)ccc1O	1.22024
1767	CC(=NCCN=C(C)c1ccccn1)c1ccccn1	1.20674
1768	CC(=NN=C(C)c1ccccc1Cl)c1ccccc1Cl	1.26321
1769	CC(=NN=C(C)c1ccccc1O)c1ccccc1O	1.29568
1770	CC(=Nn1cc(C(=O)c2ccc(C)cc2)c(-c2ccc(C)cc2)nc1=O)c1ccc(C)cc1	1.23428
1771	CC(=Nn1cc(C(=O)c2ccc(C)cc2)c(-c2ccc(C)cc2)nc1=O)c1ccccc1	1.18395
1772	CC(=NNC(=O)c1ccc(O)cc1)c1ccccc1O	1.38703
1773	CC(=NNC(=O)c1ccccc1)c1ccc(Br)cc1	1.534
1774	CC(=NNC(=O)c1ccccc1)c1ccc(Cl)cc1	1.35162
1775	CC(=NNC(=O)c1ccccc1)c1ccc(N)cc1	1.29957
1776	CC(=NNC(=O)c1ccccc1)c1ccccc1N	1.31681
1777	CC(=NNC(=O)c1ccccc1[N+](=O)[O-])c1ccccn1	1.3351
1778	CC(=NNC(=O)c1ccccc1C)c1ccccn1	1.23763
1779	CC(=NNC(=O)c1ccccc1Cl)c1cc(Br)ccc1O	1.65169
1780	CC(=NNC(=O)c1ccccc1O)c1ccc(Br)cc1	1.61869
1781	CC(=NNC(=O)c1ccccc1O)c1ccc(Cl)cc1	1.40732
1782	CC(=NNC(=O)c1ccccc1O)c1cccc(C(C)=NNC(=O)c2ccccc2O)n1	1.31905
1783	CC(=NNC(=O)c1ccccc1O)c1ccccn1	1.31396
1784	CC(=NNC(=O)c1ccccc1O)c1nccnc1C	1.37572
1785	CC(=NNC(=O)c1cccnc1)c1ccccn1	1.33704
1786	CC(=NNC(=O)c1ccco1)c1ccccc1O	1.33947
1787	CC(=NNC(=O)c1ccncc1)c1ccc(N)cc1	1.35146
1788	CC(=NNC(=O)c1ccncc1)c1ccccc1	1.29374
1789	CC(=NNC(=O)c1cnccn1)c1ccccc1O	1.38504
1790	CC(=NNC(=O)CC#N)c1ccccn1	1.30627
1791	CC(=NNC(=O)Cn1cc([N+](=O)[O-])nc1C)c1ccc(C)cc1	1.30751
1792	CC(=NNC(=O)NN)c1ccc(Cl)cc1	1.43651
1793	CC(=NNC(=O)NN)c1ccccc1	1.26215
1794	CC(=NNC(=O)NN=C(C)c1ccccc1)c1ccccc1	1.25331
1795	CC(=NNC=O)c1ccc(Cl)cc1	1.39465
1796	CC(=NNC=O)c1cccc(F)c1	1.38272
1797	CC(=NNc1c([N+](=O)[O-])cc([N+](=O)[O-])cc1[N+](=O)[O-])c1ccccc1	1.54811
1798	CC(=NNc1ccc([N+](=O)[O-])cc1)c1cnccn1	1.41771
1799	CC(=NNc1ccc([N+](=O)[O-])cc1[N+](=O)[O-])c1ccccc1	1.45554
1800	CC(=NNc1ccc([N+](=O)[O-])cc1[N+](=O)[O-])c1ccccc1Cl	1.52417
1801	CC(=NNc1ccc([N+](=O)[O-])cc1[N+](=O)[O-])c1ccco1	1.53064
1802	CC(=NNc1ccc(Cl)nn1)c1ccccc1	1.37011
1803	CC(=NNc1ccnc2c(C(F)(F)F)cccc12)c1ccc(C)cc1	1.37014
1804	CC(=NO)[N+](=O)[O-]	1.607
1805	CC(=NO)C(=Cc1cccnc1)c1ccccc1	1.19949
1806	CC(=NO)C(=Cc1ccncc1)c1ccc(Cl)cc1	1.27663
1807	CC(=NO)C(=O)c1ccc(Cl)cc1	1.45186
1808	CC(=NO)C(=O)NN=C(C)c1ccccn1	1.32466
1809	CC(=NO)C(C)=NCc1ccccn1	1.23709
1810	CC(=NO)C(C)=NNC(=O)c1ccccn1	1.37554
1811	CC(=NO)C(C)=NOc1cnccn1	1.31671
1812	CC(=NO)c1ccc(N=Cc2cc(Br)ccc2O)cc1	1.6303
1813	CC(=NO)c1ccc(N=Cc2cc(Cl)ccc2O)cc1	1.45855
1814	CC(=NO)c1ccc(N=Cc2ccc([N+](=O)[O-])cc2)cc1	1.40031
1815	CC(=NO)c1ccc(N=Cc2ccc(C)cc2)cc1	1.22837
1816	CC(=NO)c1ccc(N=Cc2ccc(Cl)cc2Cl)cc1	1.45161
1817	CC(=NO)c1cccc(N=Cc2cc(Br)cc(Br)c2O)c1	1.81942
1818	CC(=NO)c1cccc(N=Cc2ccccc2OCCOc2ccccc2C=Nc2cccc(C(C)=NO)c2)c1	1.31241
1819	CC(=NOC1=N[CH]C=N[CH]1)C(C)=NOC1=N[CH]C=N[CH]1	1.42011
1820	CC(=NOCCCCCCCCCCON=C(C)c1ccccc1O)c1ccccc1O	1.1807
1821	CC(=NOCCCCCCCCON=C(C)c1ccccc1O)c1ccccc1O	1.21716
1822	CC(=NOCCCCCCCON=C(C)c1ccc2ccccc2c1O)c1ccc2ccccc2c1O	1.2412
1823	CC(=NOCCCCCCON=C(C)c1ccccc1O)c1ccccc1O	1.23941
1824	CC(=NOCCCCON=C(C)c1ccc2ccccc2c1O)c1ccc2ccccc2c1O	1.29074
1825	CC(=NOCCCCON=C(C)c1ccccc1O)c1ccccc1O	1.30602
1826	CC(=NOCCCON=C(C)c1ccc2ccccc2c1O)c1ccc2ccccc2c1O	1.31188
1827	CC(=NOCCON=C(C)c1ccc2ccccc2c1O)c1ccc2ccccc2c1O	1.31757
1828	CC(=NOCCON=C(C)c1ccccc1O)c1ccccc1O	1.28816
1829	CC(=O)[C]1[N]N(c2ccccc2)[C](C(C)=O)[N]N1c1ccccc1	1.28961
1830	CC(=O)C([N][N]c1ccccc1Cl)=C(C)N	1.37337
1831	CC(=O)C(=Cc1ccc(Br)cc1)CN1C(=O)CN(C)C1=O	1.55691
1832	CC(=O)C(=Cc1ccc(C(F)(F)F)cc1)CN1C(=O)c2ccccc2C1=O	1.44939
1833	CC(=O)C(=Cc1ccc(C)cc1)C(=O)c1ccccc1	1.20368
1834	CC(=O)C(=Cc1ccc(F)cc1)C(=O)c1ccccc1	1.26094
1835	CC(=O)C(=Cc1cccc([N+](=O)[O-])c1)C(=O)OC(C)C	1.33424
1836	CC(=O)C(=Cc1cccc([N+](=O)[O-])c1)C(C)=O	1.34361
1837	CC(=O)C(=Cc1ccccc1)COc1ccc([N+](=O)[O-])cc1	1.32211
1838	CC(=O)C(=Cc1ccccc1)COc1ccc([N+](=O)[O-])cc1[N+](=O)[O-]	1.39842
1839	CC(=O)C(=Cc1ccccc1Br)Cc1c[nH]c2ccc(Br)cc12	1.66638
1840	CC(=O)C(=CN1C(=O)CCN1c1ccccc1)CC(=O)c1ccccc1	1.29448
1841	CC(=O)C(=NNc1ccc(Br)cc1)C(=O)O	1.73645
1842	CC(=O)C(=NNc1ccc(I)cc1)C(C)=O	1.78957
1843	CC(=O)C(=NNc1ccccc1)C(=C[N][N]c1ccccc1)N(C)C	1.21011
1844	CC(=O)C(=NNc1ccccc1)C(=O)O	1.38748
1845	CC(=O)C(=NNc1ccccc1C(=O)O)C(=O)Nc1ccccc1	1.40424
1846	CC(=O)C(=NNc1ccccc1C(=O)O)C(C)=O	1.39436
1847	CC(=O)C(=NNc1ccccc1C(F)(F)F)C(C)=O	1.4647
1848	CC(=O)C(=NNc1ccccc1Cl)C(=O)Nc1ccccc1C	1.34951
1849	CC(=O)C(C#N)=Cc1ccc(C#N)o1	1.38317
1850	CC(=O)C(C#N)=NNc1ccc(C#N)cc1	1.28639
1851	CC(=O)C(C#N)=NNc1ccc(C(C)=O)cc1	1.33548
1852	CC(=O)C(C#N)=NNc1ccc(C)cc1	1.23706
1853	CC(=O)C(C#N)=NNc1ccccc1[N+](=O)[O-]	1.44252
1854	CC(=O)C(C#N)=NNc1ccccc1Br	1.59991
1855	CC(=O)C(C#N)=NNc1ccccc1C	1.23696
1856	CC(=O)C(C#N)=NNc1ccccc1C(C)=O	1.27439
1857	CC(=O)C(C(=O)c1ccccc1)C(C[N+](=O)[O-])c1ccccc1	1.28093
1858	CC(=O)C(C(C)=O)=C1C=Cc2ccc(C=Cc3cccnc3N(C(C)=O)C(C)=O)nc2N1	1.32953
1859	CC(=O)C(C(C)=O)C(C)c1ccc(Cl)cc1	1.22546
1860	CC(=O)C(C(C)=O)C(C[N+](=O)[O-])c1ccc(Br)cc1	1.52412
1861	CC(=O)C(C(C)=O)C(c1ccccc1)(c1ccccc1)c1ccccc1	1.22403
1862	CC(=O)C(C(C)=O)C1C2CC(O[N+](=O)[O-])C1C1CC=CC12	1.356
1863	CC(=O)C(C)(C(C)=O)C(=O)c1ccccc1	1.24915
1864	CC(=O)C(C)(c1ccc[nH]1)c1ccc(C(C)(C(C)=O)c2ccc[nH]2)[nH]1	1.20777
1865	CC(=O)C(C)(c1ccc[nH]1)c1ccc[nH]1	1.23158
1866	CC(=O)C(C)(O)C1N=C2CC3CC(C2(C)OC1=O)C3(C)C	1.25729
1867	CC(=O)C(C)=C1N=C2CC3CC(C2(C)OC1=O)C3(C)C	1.19948
1868	CC(=O)C(C)C([O])CN1C(=O)c2ccc(Br)cc2C1=O	1.58277
1869	CC(=O)C(C)C1N=C2CC3CC(C2(C)OC1=O)C3(C)C	1.19259
1870	CC(=O)C(c1ccccc1)C12OCC(O)C1N(Cc1ccccc1)C2=O	1.24857
1871	CC(=O)C(CC(=O)O)C(C)=O	1.28069
1872	CC(=O)C(Cc1c2ccccc2cc2ccccc12)C(C)=O	1.21371
1873	CC(=O)C(Cc1ccc([N+](=O)[O-])cc1)(OOC(C)(C)C)C(C)=O	1.21959
1874	CC(=O)C(Cc1ccc(CC(C(C)=O)C(C)=O)cc1)C(C)=O	1.22141
1875	CC(=O)C(Cc1ccccc1)(Cc1ccccc1)C(C)=O	1.18547
1876	CC(=O)C(CCC#N)(CCC#N)C(C)=O	1.27065
1877	CC(=O)C(CCl)C(O)c1ccc([N+](=O)[O-])cc1	1.43733
1878	CC(=O)C(O)C(O)c1ccc([N+](=O)[O-])cc1	1.4201
1879	CC(=O)C=C(O)c1cc2cc([N+](=O)[O-])ccc2oc1=O	1.53133
1880	CC(=O)C=C1NC(=O)c2ccccc21	1.37315
1881	CC(=O)C=CC1(O)C(C)C(O)C(O)CC1(C)C	1.20258
1882	CC(=O)C=Cc1c2cccccc-2c2c1ccc1ccccc12	1.30462
1883	CC(=O)C=Cc1cc(N(C)C)ccc1Cc1ccc(N(C)C)cc1I	1.50905
1884	CC(=O)C=Cc1ccc2c(c1)OCO2	1.37554
1885	CC(=O)C=Cc1ccccc1O	1.25608
1886	CC(=O)C1(C(C[N+](=O)[O-])c2ccc(Br)cc2)CCOC1=O	1.58767
1887	CC(=O)C1(C(NC(=O)OC(C)(C)C)c2ccccc2Br)CCOC1=O	1.41068
1888	CC(=O)C1(C)CCC2C(CCC3=CC(=O)CCC32C)C1CC#N	1.18303
1889	CC(=O)C1(C)CCC2CC(C)(C(=O)CO)CCC2(C)C1CC(=O)O	1.28988
1890	CC(=O)C1(C)CCC2CC(C)(C(O)CCl)CCC2(C)C1CC(=O)O	1.28758
1891	CC(=O)C1(O)C(Br)CC2C3CCC4=CC(=O)CCC4(C)C3CCC21C	1.34827
1892	CC(=O)C1(O)CCC2C3C=C(Cl)C4=CC(=O)C5CC5C4(C)C3CCC21C	1.2997
1893	CC(=O)C1(O)CCC2C3CCC4=CC(=O)C=CC4(C)C3CCC21C	1.25282
1894	CC(=O)C1=C(C)C2C(=O)OC3CCC(C)(C)C(=C1)C32C	1.224
1895	CC(=O)C1=C(C)N(C)C(c2ccccc2)=C(C(=O)c2ccccc2Cl)C1	1.28766
1896	CC(=O)C1=C(C)N2C(c3ccccc3)COC2(C)CC1	1.2145
1897	CC(=O)C1=C(C)N2C(CC1)OCC2c1ccccc1	1.23531
1898	CC(=O)C1=C(C)NC(=O)C1	1.33253
1899	CC(=O)C1=C(C)NC(C)=C(C(C)=O)C1c1ccc([N+](=O)[O-])o1	1.37356
1900	CC(=O)C1=C(C)NC(C)=C(C(C)=O)C1c1ccc(Br)o1	1.50906
1901	CC(=O)C1=C(C)NC(C)=C(C(C)=O)C1c1ccc(Cl)cc1Cl	1.40011
1902	CC(=O)C1=C(C)NC(C)=C(C(C)=O)C1c1cccc([N+](=O)[O-])c1	1.35188
1903	CC(=O)C1=C(C)OC2(C1)c1ccccc1C(Cc1c3ccccc3cc3ccccc13)c1ccccc12	1.28452
1904	CC(=O)C1=C(c2ccc(C)cc2)C(=NO)CCC1	1.17636
1905	CC(=O)C1=C(N)c2ccccc2C1	1.24774
1906	CC(=O)C1=CC2C(=O)N(C)C(=O)C2C1c1ccc(Br)cc1	1.53427
1907	CC(=O)C1=Cc2ccccc2-c2c(c3cc(Br)ccc3n2C(=O)OC(C)(C)C)C1	1.41925
1908	CC(=O)C1=CCC2C3C=CC4=CC(=O)CCC4(C)C3CC(O)C12C	1.2344
1909	CC(=O)C1=CCC2C3CC(=O)C4=CC(OC(=O)c5ccc(F)cc5)CCC4(C)C3CCC12C	1.27687
1910	CC(=O)C1=CCC2C3CCC4=CC(=O)C=CC4(C)C3(Br)C(O)CC12C	1.47562
1911	CC(=O)C1=CCC2C3CCC4=CC(=O)C=CC4(C)C3=CCC12C	1.1904
1912	CC(=O)C1=CCC2C3CCC4=CC(=O)C=CC4(C)C3C(O)CC12C	1.19692
1913	CC(=O)C1=CCC2C3CCC4=CC(=O)C=CC4(C)C3CCC12C	1.1984
1914	CC(=O)C12c3ccccc3C(C3OC31)N2C(=O)c1ccccc1	1.3252
1915	CC(=O)C12CC3C4CC5C6CC7CC5C(C4C1)C(C7)(C2)C63	1.26357
1916	CC(=O)C12CC3CC(CC(O)(C3)C1)C2	1.25363
1917	CC(=O)C12CCCC(C)(C)C1C1C(Br)(Br)C1(C)CC2	1.58769
1918	CC(=O)C12OC(=O)C=CC1(C)CCC1C(C)C(=O)OC12	1.33586
1919	CC(=O)C12OC1CC1C3CCC4=CC(=O)C=CC4(C)C3C(O)CC12C	1.26166
1920	CC(=O)C12OC1CC1C3CCC4=CC(=O)CCC4(C)C3C(=O)CC12C	1.30808
1921	CC(=O)C12OC1CC1C3CCC4=CC(=O)CCC4(C)C3C(O)CC12C	1.24752
1922	CC(=O)C12OC1CC1C3CCC4=CC(=O)CCC4(C)C3CCC12C	1.20329
1923	CC(=O)c1c(C(=O)O)nn(-c2ccccc2)c1C	1.39197
1924	CC(=O)c1c(C(C#N)C(N)=O)c(-c2ccc(Cl)cc2)n(-c2ccc(C)cc2)c1C	1.3257
1925	CC(=O)c1c(C)cc(C)cc1O	1.23286
1926	CC(=O)C1C(C)CCCC1(O)c1ccccc1	1.19485
1927	CC(=O)c1c(C)n(C2CC2)c2c1c(C#N)c(O)c1ccccc12	1.36433
1928	CC(=O)c1c(C)n(Cc2ccccc2)c2c1c(C#N)c(O)c1ccccc12	1.30829
1929	CC(=O)c1c(C)nn(-c2ccccc2)c1N(C)C(=O)c1ccccc1-n1c(C)nc2ccccc2c1=O	1.28331
1930	CC(=O)c1c(C)oc2cc(C)c(Cl)c(C)c2c1=O	1.39225
1931	CC(=O)c1c(C=C(c2ccccc2)N2CCCC2)oc2ccccc12	1.2409
1932	CC(=O)c1c(-c2ccccc2)c2cc(Cl)ccc2[nH]c1=O	1.35576
1933	CC(=O)c1c(-c2ccccc2)cn(-c2ccc(C(C)(C)C)cc2)c1C	1.13735
1934	CC(=O)c1c(-c2ccccc2)cn(-c2ccc(OC(F)(F)F)cc2)c1C	1.34875
1935	CC(=O)c1c(-c2ccccc2)noc1C	1.26559
1936	CC(=O)C1C(c2ccco2)CN(C)C12C(=O)Nc1ccccc12	1.29133
1937	CC(=O)c1c(O)c(C(C)C)cc2c(c1=O)C13CCCC(C)(C)C1C(=O)C2OC3=O	1.29197
1938	CC(=O)c1c(O)c2ccccc2[nH]c1=O	1.46464
1939	CC(=O)c1c(O)ccc2c(C)cc(=O)oc12	1.43645
1940	CC(=O)c1c(O)cccc1O	1.39923
1941	CC(=O)c1c(OC(=O)c2ccccc2)cc(OC(=O)c2ccccc2)cc1OC(=O)c1ccccc1	1.32629
1942	CC(=O)c1c(OCc2cc3cc(C)ccc3nc2Cl)nc2ccc(Cl)cc2c1-c1ccccc1	1.34148
1943	CC(=O)c1c(OCc2cc3cccc(C)c3nc2Cl)nc2ccc(Cl)cc2c1-c1ccccc1	1.38379
1944	CC(=O)C1C(OCc2ccccc2)C2OC(C)(C)OC2C1(O)CO[Si](C)(C)C(C)(C)C	1.15171
1945	CC(=O)c1c[nH]c(C=O)c1	1.37892
1946	CC(=O)c1c2c(n(-c3ccc(Cl)cc3)c1C)C(=O)c1ccccc1C2=O	1.45798
1947	CC(=O)c1c2c3cc4c1CCCc1cc(c(c(C(C)=O)c1CCC4)CCC3)CCC2	1.2847
1948	CC(=O)c1c2cc3c4c1CCCc1c(C=O)c(cc(c1CCC4)CCC3)CCC2	1.29335
1949	CC(=O)C1C2CC3CC1CC(O)(C3)C2	1.23268
1950	CC(=O)C1c2ccccc2-c2ccccc21	1.21577
1951	CC(=O)c1c2ccccc2cc2ccccc12	1.25113
1952	CC(=O)c1cc([C]([C](c2ccccc2)c2cc(C(C)=O)c(C)o2)c2ccccc2)oc1C	1.2032
1953	CC(=O)c1cc([N][N]c2ccc(C)cc2)ccc1O	1.2844
1954	CC(=O)c1cc([N][N]c2cccc(Cl)c2)ccc1O	1.41267
1955	CC(=O)c1cc([N][N]c2ccccc2)ccc1O	1.31212
1956	CC(=O)c1cc([N][N]c2ccccc2Cl)ccc1O	1.41908
1957	CC(=O)C1CC(=C(c2ccccc2)c2ccccc2)C(=C(C)C)C1(C)C	1.11013
1958	CC(=O)C1CC(=C(c2ccccc2)c2ccccc2)C(=C(c2ccccc2)c2ccccc2)C1	1.16207
1959	CC(=O)c1cc(Br)ccc1N	1.73339
1960	CC(=O)c1cc(C(=O)c2ccccc2)oc1C	1.31654
1961	CC(=O)C1CC(C(=O)O)C1(C)C	1.17559
1962	CC(=O)c1cc(C(C)=O)c2ccc3cccc4ccc1c2c43	1.3684
1963	CC(=O)c1cc(C)c(O)c(C)c1O	1.32278
1964	CC(=O)c1cc(C)c(O)c(CC2=C(C)C(=O)C(O)=C(C)C2=O)c1O	1.4239
1965	CC(=O)c1cc(C)c(O)c(CC2=C(O)C(C)OC2=O)c1O	1.3896
1966	CC(=O)c1cc(C)cc(C(C)=O)c1O	1.26852
1967	CC(=O)c1cc(C)ccc1OC(=O)c1ccc(C)cc1	1.24027
1968	CC(=O)c1cc(-c2ccccc2)n(-c2ccc(F)cc2)c1C	1.27786
1969	CC(=O)c1cc(OCc2ccccc2)c(OCc2ccccc2)cc1C	1.23412
1970	CC(=O)c1cc2c(c(Br)c1C)C(C)(C)C(C)CC2(C)C	1.31408
1971	CC(=O)c1cc2c(ccc3c(C)cccc32)[nH]1	1.28194
1972	CC(=O)C1Cc2cc(Br)ccc2NC1c1ccccc1	1.48108
1973	CC(=O)c1cc2cc(Cl)ccc2oc1=O	1.54094
1974	CC(=O)c1cc2ccccc2n2nnnc12	1.4812
1975	CC(=O)C1CCC(C(=O)O)CC1	1.23448
1976	CC(=O)c1ccc(C(C)(C)c2ccc(C(C)=O)[nH]2)[nH]1	1.19358
1977	CC(=O)c1ccc(C)c2ccccc12	1.20675
1978	CC(=O)c1ccc(C=Cn2c3ccccc3c3ccccc32)cc1	1.23791
1979	CC(=O)c1ccc(-c2ccc(F)cc2F)cc1	1.3922
1980	CC(=O)c1ccc(Cl)c(Cl)c1	1.5621
1981	CC(=O)c1ccc(N(c2ccc(C(C)=O)cc2)c2ccc(C(C)=O)cc2)cc1	1.27047
1982	CC(=O)c1ccc(N(c2ccccc2)c2ccccc2)cc1	1.23411
1983	CC(=O)c1ccc(N[N][N]c2ccc([N+](=O)[O-])cc2)cc1	1.38659
1984	CC(=O)c1ccc(N=Cc2cccc(O)c2O)cc1	1.37522
1985	CC(=O)c1ccc(N=Cc2ccccc2O)cc1	1.31109
1986	CC(=O)c1ccc(-n2c(C)ccc2C)cc1	1.19474
1987	CC(=O)c1ccc(N2CCC3(CC2)OCCO3)cc1	1.2881
1988	CC(=O)c1ccc(NC2C=C(C)CCC2)cc1	1.19698
1989	CC(=O)c1ccc(NC2OC(=O)c3ccccc32)cc1	1.38954
1990	CC(=O)c1ccc(NN=C(C(=O)c2ccccc2)C(=O)c2ccccc2)cc1	1.29969
1991	CC(=O)c1ccc(O)cc1O	1.41636
1992	CC(=O)c1ccc(OC(=O)c2cccc(C)c2)cc1	1.27357
1993	CC(=O)c1ccc(Oc2ccc(F)cc2)cc1Cl	1.43179
1994	CC(=O)c1ccc(Oc2ccc(F)cc2)cc1Oc1ccc(F)cc1	1.35997
1995	CC(=O)c1ccc(OCC(=O)O)cc1OCC(=O)O	1.50669
1996	CC(=O)c1ccc(OCC=C(C)C)cc1O	1.22837
1997	CC(=O)c1ccc(OCc2cc(F)cc(F)c2)cc1O	1.42512
1998	CC(=O)c1ccc(OCc2ccccc2)cc1O	1.29986
1999	CC(=O)c1ccc(OCc2cn(Cc3ccc(C#N)cc3)nn2)cc1	1.31007
[truncated: 10,806 more rows]

## Sheet: HOF
ID	CASRN	Smiles	exp. HOF
1	22110-53-8	[C-]#[N+]C12CC3CC(C1)CC(C3)C2	73.1
2	74-82-8	C	-74.5
3	74-86-2	C#C	227.45
4	16668-68-1	C#C/C=C/C#C	539.9
5	593-61-3	C#CBr	269
6	460-12-8	C#CC#C	464
7	1070-71-9	C#CC#N	354
8	72323-66-1	C#CC1(CC1)C#C	538.5
9	536-74-3	C#CC1=CC=CC=C1	306.6
10	6746-94-7	C#CC1CC1	292
11	593-63-5	C#CCl	226
12	2525-40-8	C#CCS(=O)(=O)C1=CC=CC=C1	36
13	32038-79-2	C#CO	41.6
14	121564-25-8	C#CSO	102
15	1071-98-3	C(#CC#N)C#N	529.3
16	7572-29-4	C(#CCl)Cl	227
17	689-99-6	C(#CF)F	-190
18	506-68-3	C(#N)Br	185.6
19	460-19-5	C(#N)C#N	308.9
20	670-54-2	C(#N)C(=C(C#N)C#N)C#N	688.1
21	24331-09-7	C(#N)C(C#N)(C#N)C#N	672.8
22	353-85-5	C(#N)C(F)(F)F	-460
23	506-78-5	C(#N)I	224.6
24	764-05-6	C(#N)N=[N+]=[N-]	501.1
25	505-14-6	C(#N)SSC#N	344
26	70-47-3	C([C@@H](C(=O)O)N)C(=O)N	-615.2
27	56-84-8	C([C@@H](C(=O)O)N)C(=O)O	-796.8
28	56-45-1	C([C@@H](C(=O)O)N)O	-584.7
29	52-90-4	C([C@@H](C(=O)O)N)S	-395.5
30	509-14-8	C([N+](=O)[O-])([N+](=O)[O-])([N+](=O)[O-])[N+](=O)[O-]	88.2824
31	560-95-2	C([N+](=O)[O-])([N+](=O)[O-])([N+](=O)[O-])Br	94.6
32	1943-16-4	C([N+](=O)[O-])([N+](=O)[O-])([N+](=O)[O-])Cl	21
33	630-70-6	C([N+](=O)[O-])([N+](=O)[O-])([N+](=O)[O-])I	163
34	1185-11-1	C([N+](=O)[O-])([N+](=O)[O-])(F)F	-403
35	517-25-9	C([N+](=O)[O-])([N+](=O)[O-])[N+](=O)[O-]	10.2
36	7182-87-8	C([N+](=O)[O-])([N+](=O)[O-])F	-235
37	625-76-3	C([N+](=O)[O-])[N+](=O)[O-]	-38.4928
38	997-76-2	C(=C(C#N)C#N)C#N	520.4
39	1584-03-8	C(=C(C(C(F)(F)F)(F)F)F)(C(F)(F)F)C(F)(F)F	-2499
40	30320-26-4	C(=C(C(F)(F)F)C(F)(F)F)(C(C(F)(F)F)(C(F)(F)F)F)C(C(F)(F)F)(F)F	-3753.3
41	127-18-4	C(=C(Cl)Cl)(Cl)Cl	-24
42	79-01-6	C(=C(Cl)Cl)Cl	-18
43	79-38-9	C(=C(F)Cl)(F)F	-505.5
44	116-15-4	C(=C(F)F)(C(F)(F)F)F	-1151.7
45	116-14-3	C(=C(F)F)(F)F	-658.6
46	359-11-5	C(=C(F)F)F	-474
47	764-42-1	C(=C/C#N)\C#N	340
48	65144-74-3	C(=C\O)\O	-316
49	504-64-3	C(=C=O)=C=O	-97.8
50	4452-08-8	C(=C=O)C#N	100
51	156-60-5	C(=CCl)Cl	-2
52	590-26-1	C(=CI)I	207.4
53	75-13-8	C(=N)=O	-97
54	10051-06-6	C(=NF)(N(F)F)N(F)F	95.7
55	593-95-3	C(=O)(Br)Br	-113.5
56	79-37-8	C(=O)(C(=O)Cl)Cl	-335.8
57	471-46-5	C(=O)(C(=O)N)N	-387.1
58	471-47-6	C(=O)(C(=O)O)N	-552.3
59	76-02-8	C(=O)(C(Cl)(Cl)Cl)Cl	-253
60	76-03-9	C(=O)(C(Cl)(Cl)Cl)O	-433.67
61	76-05-1	C(=O)(C(F)(F)F)O	-1018
62	75-44-5	C(=O)(Cl)Cl	-220.1
63	353-50-4	C(=O)(F)F	-640.6
64	57-13-6	C(=O)(N)N	-235.5
65	671181-09-2	C(=O)(N)N(C(=O)N[N+](=O)[O-])[N+](=O)[O-]	-255
66	108-19-0	C(=O)(N)NC(=O)N	-437
67	107-22-2	C(=O)C=O	-212
68	75-12-7	C(=O)N	-186
69	64-18-6	C(=O)O	-378.6
70	79-40-3	C(=S)(C(=S)N)N	83
71	62-56-6	C(=S)(N)N	22.9
72	79-19-6	C(=S)(N)NN	128.2
73	2231-57-4	C(=S)(NN)NN	260.2
74	558-13-4	C(Br)(Br)(Br)Br	83.9
75	75-25-2	C(Br)(Br)Br	55.4
76	109-77-3	C(C#N)C#N	266.3
77	57707-64-9	C(C#N)N=[N+]=[N-]	457.4
78	918-37-6	C(C([N+](=O)[O-])([N+](=O)[O-])[N+](=O)[O-])([N+](=O)[O-])([N+](=O)[O-])[N+](=O)[O-]	122.089
79	19836-28-3	C(C([N+](=O)[O-])([N+](=O)[O-])[N+](=O)[O-])N(CC([N+](=O)[O-])([N+](=O)[O-])[N+](=O)[O-])[N+](=O)[O-]	89.6427
80	34882-73-0	C(C([N+](=O)[O-])([N+](=O)[O-])[N+](=O)[O-])N(CC([N+](=O)[O-])([N+](=O)[O-])[N+](=O)[O-])N=O	147
81	34880-53-0	C(C([N+](=O)[O-])([N+](=O)[O-])[N+](=O)[O-])NCC([N+](=O)[O-])([N+](=O)[O-])[N+](=O)[O-]	47.3
82	23072-51-7	C(C([N+](=O)[O-])([N+](=O)[O-])F)([N+](=O)[O-])([N+](=O)[O-])[N+](=O)[O-]	-86.2
83	20165-39-3	C(C([N+](=O)[O-])([N+](=O)[O-])F)([N+](=O)[O-])([N+](=O)[O-])F	-352
84	20165-38-2	C(C([N+](=O)[O-])(F)F)([N+](=O)[O-])([N+](=O)[O-])F	-601
85	356-16-1	C(C([N+](=O)[O-])(F)F)([N+](=O)[O-])(F)F	-812
86	79-36-7	C(C(=O)Cl)(Cl)Cl	-241
87	79-04-9	C(C(=O)Cl)Cl	-246
88	108-13-4	C(C(=O)N)C(=O)N	-416.4
89	556-33-2	C(C(=O)NCC(=O)NCC(=O)O)N	-772.6
90	556-50-3	C(C(=O)NCC(=O)O)N	-576
91	80-69-3	C(C(=O)O)(C(=O)O)O	-952
92	56-40-6	C(C(=O)O)N	-392.1
93	594-73-0	C(C(Br)(Br)Br)(Br)(Br)Br	133
94	3021-63-4	C(C(C(C(C(C(C(F)(F)F)(C(F)(F)F)F)(F)F)(F)F)(F)F)(F)F)(C(F)(F)F)(C(F)(F)F)F	-4639.1
95	65064-85-9	C(C(C(C(C(C(C(F)F)(F)F)(F)F)(F)F)(F)F)(F)F)OC(C(F)Cl)(F)F	-3391.9
96	355-74-8	C(C(C(C(C(CO)(F)F)(F)F)(F)F)(F)F)O	-2084
97	65064-84-8	C(C(C(C(C(F)F)(F)F)(F)F)(F)F)OC(C(F)Cl)(F)F	-2555.6
98	311-89-7	C(C(C(F)(F)F)(F)F)(C(N(C(C(C(C(F)(F)F)(F)F)(F)F)(F)F)C(C(C(C(F)(F)F)(F)F)(F)F)(F)F)(F)F)(F)F	-5583.5
99	308-48-5	C(C(C(F)(F)F)(F)F)(C(OC(C(C(C(F)(F)F)(F)F)(F)F)(F)F)(F)F)(F)F	-3979.2
100	679-86-7	C(C(C(F)F)(F)F)F	-564
101	65064-83-7	C(C(C(F)F)(F)F)OC(C(F)Cl)(F)F	-1720.7
102	464-36-8	C(C(C(OC(C(C(C(C(F)(F)F)(F)F)(F)F)(F)F)(F)F)(F)F)(F)F)(C(C(F)(F)F)(F)F)(F)F	-4806.4
103	96-18-4	C(C(CCl)Cl)Cl	-183
104	616-23-9	C(C(CCl)Cl)O	-316
105	67-72-1	C(C(Cl)(Cl)Cl)(Cl)(Cl)Cl	-148.2
106	76-01-7	C(C(Cl)(Cl)Cl)(Cl)Cl	-155.9
107	630-20-6	C(C(Cl)(Cl)Cl)Cl	-152.3
108	79-34-5	C(C(Cl)Cl)(Cl)Cl	-156.7
109	460-69-5	C(C(Cl)Cl)C(F)(F)F	-803.5
110	79-00-5	C(C(Cl)Cl)Cl	-148
111	56-81-5	C(C(CO)O)O	-577.9
112	55-63-0	C(C(CO[N+](=O)[O-])O[N+](=O)[O-])O[N+](=O)[O-]	-279.181
113	76-13-1	C(C(F)(Cl)Cl)(F)(F)Cl	-726.8
114	37136-24-6	C(C(F)(Cl)Cl)(OC(F)(F)Cl)(F)F	-1325.8
115	354-06-3	C(C(F)(F)Br)(F)Cl	-654.7
116	76-14-2	C(C(F)(F)Cl)(F)(F)Cl	-937
117	76-15-3	C(C(F)(F)Cl)(F)(F)F	-1114
118	661-97-2	C(C(F)(F)F)(C(F)(F)Cl)(F)Cl	-1349
119	76-19-7	C(C(F)(F)F)(C(F)(F)F)(F)F	-1784.7
120	677-71-4	C(C(F)(F)F)(C(F)(F)F)(O)O	-1551
121	431-89-0	C(C(F)(F)F)(C(F)(F)F)F	-1552
122	151-67-7	C(C(F)(F)F)(Cl)Br	-699.9
123	306-83-2	C(C(F)(F)F)(Cl)Cl	-743.9
124	76-16-4	C(C(F)(F)F)(F)(F)F	-1343.9
125	2837-89-0	C(C(F)(F)F)(F)Cl	-924.7
126	354-33-6	C(C(F)(F)F)(F)F	-1100.4
127	359-70-6	C(C(F)(F)F)(N(C(C(F)(F)F)(F)F)C(C(F)(F)F)(F)F)(F)F	-3138
128	421-06-7	C(C(F)(F)F)Br	-695
129	460-92-4	C(C(F)(F)F)C(F)(F)Cl	-1151.5
130	690-39-1	C(C(F)(F)F)C(F)(F)F	-1368
131	811-97-2	C(C(F)(F)F)F	-895.8
132	353-83-3	C(C(F)(F)F)I	-648.7
133	354-65-4	C(C(F)(F)I)(F)(F)I	-667
134	431-63-0	C(C(F)F)(C(F)(F)F)F	-1333
135	460-73-1	C(C(F)F)C(F)(F)F	-588.3
136	430-66-0	C(C(F)F)F	-691
137	598-39-0	C(C(F)F)I	-410
138	61196-11-0	C(C(OC(C(F)(Cl)Cl)(F)F)(Cl)Cl)(C(F)(F)Cl)(F)F	-1752.5
139	74-79-3	C(C[C@@H](C(=O)O)N)CN=C(N)N	-410.8
140	7570-26-5	C(C[N+](=O)[O-])[N+](=O)[O-]	-89.8
141	6125-21-9	C(C[N+](=O)[O-])C[N+](=O)[O-]	-135.6
142	57449-44-2	C(C1=NO[N+](=C1CO[N+](=O)[O-])[O-])O[N+](=O)[O-]	21
143	57449-43-1	C(C1=NON=C1CO[N+](=O)[O-])O[N+](=O)[O-]	10.881
144	110-61-2	C(CC#N)C#N	209.7
145	20919-96-4	C(CC([N+](=O)[O-])([N+](=O)[O-])[N+](=O)[O-])C[N+](=O)[O-]	-88.7
146	56-85-9	C(CC(=O)N)[C@@H](C(=O)O)N	-631.6
147	56-86-0	C(CC(=O)O)[C@@H](C(=O)O)N	-819.4
148	56-12-2	C(CC(=O)O)CN	-441
149	4286-49-1	C(CC[N+](=O)[O-])C[N+](=O)[O-]	-159.4
150	110-52-1	C(CCBr)CBr	-85.98
151	111-69-3	C(CCC#N)CC#N	149
152	60-32-2	C(CCC(=O)O)CCN	-482.4
153	1002-57-9	C(CCCC(=O)O)CCCN	-524
154	112-47-0	C(CCCCCO)CCCCO	-523.1
155	3937-56-2	C(CCCCO)CCCCO	-508.9
156	629-41-4	C(CCCCO)CCCO	-487.3
157	110-56-5	C(CCCl)CCl	-183.4
158	629-30-1	C(CCCO)CCCO	-477.6
159	629-11-8	C(CCCO)CCO	-459.4
160	628-21-7	C(CCI)CI	29
161	107-06-2	C(CCl)Cl	-132
162	56-87-1	C(CCN)C[C@@H](C(=O)O)N	-465
163	660-88-8	C(CCN)CC(=O)O	-460.2
164	111-29-5	C(CCO)CCO	-442
165	110-63-4	C(CCO)CO	-426
166	928-98-3	C(CCS)CCS	-71
167	1191-08-8	C(CCS)CS	-50.5
168	627-31-6	C(CI)CI	45.2
169	624-70-4	C(CI)Cl	-47.7
170	624-73-7	C(CI)I	73.3
171	75-62-7	C(Cl)(Cl)(Cl)Br	-42
172	67-66-3	C(Cl)(Cl)Cl	-102.9
173	74-97-5	C(Cl)Br	-20
174	75-09-2	C(Cl)Cl	-95.1
175	151-18-8	C(CN)C#N	89.75
176	107-95-9	C(CN)C(=O)O	-421.2
177	107-15-3	C(CN)N	-17
178	505-71-5	C(CN[N+](=O)[O-])N[N+](=O)[O-]	27.7
179	504-63-2	C(CO)CO	-408.4
180	102-71-6	C(CO)N(CCO)CCO	-558.3
181	1517-05-1	C(CO)N=[N+]=[N-]	114.7
182	111-42-2	C(CO)NCCO	-397.1
183	107-21-1	C(CO)O	-394.4
184	674-65-7	C(COCCC(F)(F)F)C(F)(F)F	-1604.4
185	109-80-8	C(CS)CS	-29.8
186	540-63-6	C(CS)S	-9.3
187	75-69-4	C(F)(Cl)(Cl)Cl	-288.7
188	75-43-4	C(F)(Cl)Cl	-283.3
189	75-71-8	C(F)(F)(Cl)Cl	-491.6
190	75-63-8	C(F)(F)(F)Br	-647.3
191	75-72-9	C(F)(F)(F)Cl	-707.9
192	75-73-0	C(F)(F)(F)F	-933.2
193	2314-97-8	C(F)(F)(F)I	-587.8
194	1511-62-2	C(F)(F)Br	-425.3
195	75-45-6	C(F)(F)Cl	-481.6
196	75-46-7	C(F)(F)F	-697.1
197	75-10-5	C(F)F	-450.6
198	507-25-5	C(I)(I)(I)I	267.94
199	75-11-6	C(I)I	118
200	17125-67-6	C(N(C(N(F)F)(F)F)F)(N(F)F)(N(F)F)N(F)F	-353
201	335-01-3	C(N(F)F)(F)(F)F	-707
202	4394-93-8	C(N(F)F)(N(F)F)(F)F	-455.3
203	14362-68-6	C(N(F)F)(N(F)F)(N(F)F)F	-200.1
204	17125-65-4	C(N(F)F)(N(F)F)(N(F)F)N(F)F	1.5
205	14168-44-6	C(N[N+](=O)[O-])N[N+](=O)[O-]	46.2
206	927-84-4	C(OOC(F)(F)F)(F)(F)F	-1507
207	37765-15-4	C/[N+](=[N+](\C)/[O-])/[O-]	65.9
208	696-86-6	C/1/C=C\C/C=C\C/C=C1	189
209	3725-30-2	C/1/C=C\C=C/C/C=C1	196.3
210	1522-20-9	C/C(=C/C(=O)C)/O	-385.3
211	14091-93-1	C/C(=C\C(=O)C1=CC=CC=C1)/NC	-53.7
212	38229-26-4	C/C/1=C\CCCCCC1	-5.4
213	18265-39-9	C/C=C(/C(=C/C)/C)\C	-1
214	28304-67-8	C/C=C/1\CC2CC1C=C2	148.483.
215	3724-65-0	C/C=C/C(=O)O	-368.5
216	623-43-8	C/C=C/C(=O)OC	-342
217	3246-27-3	C/C=C/C(=O)OC(C)(C)C	-424
218	18060-77-0	C/C=C/C(=O)OC(C)C	-411
219	4170-30-3	C/C=C/C=O	-109.7
220	16529-66-1	C/C=C/CC#N	126
221	62030-41-5	C/C=C/CC(=O)OC(C)C	-425
222	24931-66-6	C/C=C/CS(=O)(=O)C1=CC=C(C=C1)C	-241
223	32228-15-2	C/C=C/S(=O)(=O)C1=CC=C(C=C1)C	-209
224	22704-38-7	C/C=C\1/CCC=C1	84.5
225	150895-64-0	C[C@@]1(C[C@@H]1C2CC2)C3CC3	180.1
226	72-19-5	C[C@H]([C@@H](C(=O)O)N)O	-624.6
227	2734-31-8	C[C@H]1C[C@@H]2C[C@H]([C@H]1C)C2(C)C	-184
228	593-75-9	C[N+]#[C-]	163.5
229	75-52-5	C[N+](=O)[O-]	-71.5046
230	629-20-9	C\1=C\C=C/C=C\C=C1	296.75
231	334-88-3	C=[N+]=[N-]	271.1
232	74-85-1	C=C	52.55
233	103905-52-8	C=C(C#C)O	83
234	530-48-3	C=C(C1=CC=CC=C1)C2=CC=CC=C2	245.6
235	4383-15-7	C=C(C1=CC=CC=C1)O	-46
236	75-35-4	C=C(Cl)Cl	2
237	75-38-7	C=C(F)F	-344
238	463-49-0	C=C=C	190.5
239	3642-10-2	C=C=CCCC=C=C	369
240	2525-42-0	C=C=CS(=O)(=O)C1=CC=CC=C1	2.1
241	463-51-4	C=C=O	-87.24
242	3227-90-5	C=C1C(=C)C1=C	396
243	497-20-1	C=C1C=CC=C1	224
244	5291-90-7	C=C1C=CC1=C	336
245	3217-87-6	C=C1C=CCC=C1	150
246	31463-35-1	C=C1C2CCC1CC2	60.3
247	40117-13-3	C=C1C2CCC2C1=C	315
248	674-82-8	C=C1CC(=O)O1	-190.2
249	15760-35-7	C=C1CC(C1)C#N	252.4
250	20679-59-8	C=C1CC=CC=C1	196.6
251	6142-73-0	C=C1CC1	200.5
252	29817-09-2	C=C1CC1C2=CC=CC=C2	292
253	2972-20-5	C=C1CC2CCC1CC2	-9.225
254	4982-20-1	C=C1CCC(=C)CC1	64.39
255	930-26-7	C=C1CCC=C1	115
256	1120-56-5	C=C1CCC1	113.8
257	52086-82-5	C=C1CCCC(=C)C1	54.4
258	1528-30-9	C=C1CCCC1	12
259	20968-70-1	C=C1CCCC1=C	94.1
260	1192-37-6	C=C1CCCCC1	-25.2
261	593-60-2	C=CBr	79.2
262	689-97-4	C=CC#C	295
263	107-13-1	C=CC#N	172.6
264	3642-21-5	C=CC(=C)C(=C)C=C	259
265	59120-04-6	C=CC(=C)O	-77
266	79-06-1	C=CC(=O)N	-130.2
267	79-10-7	C=CC(=O)O	-330.7
268	677-21-4	C=CC(F)(F)F	-614.2
269	106-99-0	C=CC=C	109.4
270	821-07-8	C=CC=CC=C	170
271	70411-98-2	C=CC=CO	-89
272	17085-84-6	C=CC1(CC1)C=C	202
273	42206-11-1	C=CC1=C(CC1)C=C	262
274	693-86-7	C=CC1CC1	127
275	23890-32-6	C=CC1CC2CC1C=C2	157.6
276	21145-78-8	C=CC1CC2CCC1C=C2	106
277	100-40-3	C=CC1CCC=CC1	67.95
278	6553-48-6	C=CC1CCC1C=C	163.375
279	100-42-5	C=Cc1ccccc1	147.45
280	695-12-5	C=CC1CCCCC1	-48.9
281	106-95-6	C=CCBr	47.7
282	109-75-1	C=CCC#N	157.7
283	591-93-5	C=CCC=C	106
284	300-57-2	C=CCC1=CC=CC=C1	133.8
285	3524-75-2	C=CCC1CCCC1	-24.1
286	592-42-7	C=CCCC=C	83.9
287	927-73-1	C=CCCCl	-28.9
288	107-05-1	C=CCCl	-5.6
289	556-56-9	C=CCI	99.5
290	75-01-4	C=CCl	22
291	107-18-6	C=CCO	-123.6
292	6304-34-3	C=CCOC(=O)C(Cl)(Cl)Cl	-343
293	75-02-5	C=CF	-136
294	557-75-5	C=CO	-128
295	109-93-3	C=COC=C	-12.7
296	766-94-9	C=COC1=CC=CC=C1	23
297	77-77-0	C=CS(=O)(=O)C=C	-156.6
298	5535-48-8	C=CS(=O)(=O)C1=CC=CC=C1	-129
299	1115-15-7	C=CS(=O)C=C	25
300	627-51-0	C=CSC=C	106
301	2053-29-4	C=N	69
302	50-00-0	C=O	-108.6
303	865-36-1	C=S	118
304	3058-38-6	C1(=C(C(=C(C(=C1[N+](=O)[O-])N)[N+](=O)[O-])N)[N+](=O)[O-])N	34.5
305	82-68-8	C1(=C(C(=C(C(=C1Cl)Cl)Cl)Cl)Cl)[N+](=O)[O-]	4.9
306	118-74-1	C1(=C(C(=C(C(=C1Cl)Cl)Cl)Cl)Cl)Cl	-44.7
307	344-07-0	C1(=C(C(=C(C(=C1F)F)Cl)F)F)F	-809.6
308	602-94-8	C1(=C(C(=C(C(=C1F)F)F)F)F)C(=O)O	-1148.4
309	434-90-2	C1(=C(C(=C(C(=C1F)F)F)F)F)C2=C(C(=C(C(=C2F)F)F)F)F	-1264.2
310	1423-13-8	C1(=C(C(=C(C(=C1F)F)F)F)F)N=O	-669
311	771-61-9	C1(=C(C(=C(C(=C1F)F)F)F)F)O	-957.1
312	2892-51-5	C1(=C(C(=O)C1=O)O)O	-515
313	3424-05-3	C1(=C(C(C(=C(Cl)Cl)C1(Cl)Cl)(Cl)Cl)Cl)Cl	-4.1
314	77-47-4	C1(=C(C(C(=C1Cl)Cl)(Cl)Cl)Cl)Cl	-11.7
315	706-78-5	C1(=C(C(C(C1(Cl)Cl)(Cl)Cl)(Cl)Cl)Cl)Cl	-96.7
316	5637-83-2	C1(=NC(=NC(=N1)N=[N+]=[N-])N=[N+]=[N-])N=[N+]=[N-]	1137
317	5378-49-4	C1(=NNN=N1)N	323.8
318	18588-16-4	C1(=NNN=N1)N[N+](=O)[O-]	252
319	932-64-9	C1(=O)NC(=NN1)[N+](=O)[O-]	-6.5
320	108-80-5	C1(=O)NC(=O)NC(=O)N1	-564.1
321	355-02-2	C1(C(C(C(C(C1(F)F)(F)F)(F)F)(F)F)(F)F)(C(F)(F)F)F	-2897.2
322	115-25-3	C1(C(C(C1(F)F)(F)F)(F)F)(F)F	-1528
323	836-77-1	C1(C(C(N(C(C1(F)F)(F)F)F)(F)F)(F)F)(F)F	-2003.7
324	706-31-0	C1/C=C\CC/C=C\CC/C=C\C1	99.2
325	1630-08-6	C1=C(C(=C(C(=C1[N+](=O)[O-])N)[N+](=O)[O-])N)[N+](=O)[O-]	34.5
326	117-18-0	C1=C(C(=C(C(=C1Cl)Cl)[N+](=O)[O-])Cl)Cl	12.8
327	608-93-5	C1=C(C(=C(C(=C1Cl)Cl)Cl)Cl)Cl	-40
328	363-72-4	C1=C(C(=C(C(=C1F)F)F)F)F	-806
329	6627-34-5	C1=C(C(=CC(=C1Cl)[N+](=O)[O-])Cl)N	28.7
330	6641-64-1	C1=C(C(=CC(=C1Cl)Cl)[N+](=O)[O-])N	18.5
331	95-94-3	C1=C(C(=CC(=C1Cl)Cl)Cl)Cl	-32.62
332	327-54-8	C1=C(C(=CC(=C1F)F)F)F	-646.8
333	611-08-5	C1=C(C(=O)NC(=O)N1)[N+](=O)[O-]	-280.1
334	51-21-8	C1=C(C(=O)NC(=O)N1)F	-454.5
335	25242-76-6	C1=C(C=C([N+](=C1[N+](=O)[O-])[O-])[N+](=O)[O-])[N+](=O)[O-]	208.4
336	20062-22-0	C1=C(C=C(C(=C1[N+](=O)[O-])C=CC2=C(C=C(C=C2[N+](=O)[O-])[N+](=O)[O-])[N+](=O)[O-])[N+](=O)[O-])[N+](=O)[O-]	238.461
337	489-98-5	C1=C(C=C(C(=C1[N+](=O)[O-])N)[N+](=O)[O-])[N+](=O)[O-]	52.5
338	5388-62-5	C1=C(C=C(C(=C1[N+](=O)[O-])N)[N+](=O)[O-])Cl	36.1
339	3531-19-9	C1=C(C=C(C(=C1[N+](=O)[O-])N)Cl)[N+](=O)[O-]	22
340	88-89-1	C1=C(C=C(C(=C1[N+](=O)[O-])O)[N+](=O)[O-])[N+](=O)[O-]	-101.5
341	147-82-0	C1=C(C=C(C(=C1Br)N)Br)Br	159
342	118-79-6	C1=C(C=C(C(=C1Br)O)Br)Br	-0.9
343	18708-70-8	C1=C(C=C(C(=C1Cl)[N+](=O)[O-])Cl)Cl	28.1
344	634-90-2	C1=C(C=C(C(=C1Cl)Cl)Cl)Cl	-34.9
345	99-30-9	C1=C(C=C(C(=C1Cl)N)Cl)[N+](=O)[O-]	1.9
346	99-35-4	C1=C(C=C(C=C1[N+](=O)[O-])[N+](=O)[O-])[N+](=O)[O-]	70.1
347	618-62-2	C1=C(C=C(C=C1Cl)Cl)[N+](=O)[O-]	18.9
348	108-70-3	C1=C(C=C(C=C1Cl)Cl)Cl	-2.6
349	591-35-5	C1=C(C=C(C=C1Cl)Cl)O	-148.2
350	108-73-6	C1=C(C=C(C=C1O)O)O	-452.9
351	78013-51-1	C1=C(C=C(N=C1[N+](=O)[O-])[N+](=O)[O-])[N+](=O)[O-]	151.6
352	1452-15-9	C1=C(N=CS1)C#N	293.8
353	71-30-7	C1=C(NC(=O)N=C1)N	-59
354	71-00-1	C1=C(NC=N1)C[C@@H](C(=O)O)N	-289.4
355	1874-22-2	C1=C(OC(=C1)[N+](=O)[O-])/C=C/C=O	-65
356	698-63-5	C1=C(OC(=C1)[N+](=O)[O-])C=O	-147
357	1124-33-0	C1=C[N+](=CC=C1[N+](=O)[O-])[O-]	126
358	1518-16-7	C1=CC(=C(C#N)C#N)C=CC1=C(C#N)C#N	771.1
359	606-22-4	C1=CC(=C(C(=C1)[N+](=O)[O-])N)[N+](=O)[O-]	53.4
360	573-56-8	C1=CC(=C(C(=C1)[N+](=O)[O-])O)[N+](=O)[O-]	-104.1
361	576-24-9	C1=CC(=C(C(=C1)Cl)Cl)O	-151.6
362	87-65-0	C1=CC(=C(C(=C1)Cl)O)Cl	-146.3
363	87-66-1	C1=CC(=C(C(=C1)O)O)O	-434.2
364	634-66-2	C1=CC(=C(C(=C1Cl)Cl)Cl)Cl	-25.4
365	97-02-9	C1=CC(=C(C=C1[N+](=O)[O-])[N+](=O)[O-])N	48.5
366	51-28-5	C1=CC(=C(C=C1[N+](=O)[O-])[N+](=O)[O-])O	-130.9
367	99-54-7	C1=CC(=C(C=C1[N+](=O)[O-])Cl)Cl	19.7
368	619-08-9	C1=CC(=C(C=C1[N+](=O)[O-])Cl)O	-145.1
369	3316-09-4	C1=CC(=C(C=C1[N+](=O)[O-])O)O	-290
370	89-61-2	C1=CC(=C(C=C1Cl)[N+](=O)[O-])Cl	40.2
371	89-64-5	C1=CC(=C(C=C1Cl)[N+](=O)[O-])O	-149.2
372	611-06-3	C1=CC(=C(C=C1Cl)Cl)[N+](=O)[O-]	40.4
373	120-82-1	C1=CC(=C(C=C1Cl)Cl)Cl	4.9
374	120-83-2	C1=CC(=C(C=C1Cl)Cl)O	-156.3
375	583-78-8	C1=CC(=C(C=C1Cl)O)Cl	-158.4
376	610-78-6	C1=CC(=C(C=C1O)[N+](=O)[O-])Cl	-108.8
377	95-77-2	C1=CC(=C(C=C1O)Cl)Cl	-150.3
378	533-73-3	C1=CC(=C(C=C1O)O)O	-444
379	2398-81-4	C1=CC(=C[N+](=C1)[O-])C(=O)O	-225.1
380	3729-34-8	C1=CC(=C=[N+]=O)C=CC1=C=N[O-]	410.5
381	475-38-7	C1=CC(=C2C(=O)C=CC(=O)C2=C1O)O	-499.1
382	611-34-7	C1=CC(=C2C=CC=NC2=C1)N	210.6
383	99-65-0	C1=CC(=CC(=C1)[N+](=O)[O-])[N+](=O)[O-]	59.8
384	21222-05-9	C1=CC(=CC(=C1)[N+](=O)[O-])C(=O)C2=CC(=CC=C2)[N+](=O)[O-]	26.6
385	645-09-0	C1=CC(=CC(=C1)[N+](=O)[O-])C(=O)N	-122.9
386	121-92-6	C1=CC(=CC(=C1)[N+](=O)[O-])C(=O)O	-304
387	99-09-2	C1=CC(=CC(=C1)[N+](=O)[O-])N	62.3565
388	585-76-2	C1=CC(=CC(=C1)Br)C(=O)O	-268.3
389	626-17-5	C1=CC(=CC(=C1)C#N)C#N	362.7
390	121-73-3	C1=CC(=CC(=C1)Cl)[N+](=O)[O-]	40.1
391	535-80-8	C1=CC(=CC(=C1)Cl)C(=O)O	-321.8
392	1878-65-5	C1=CC(=CC(=C1)Cl)CC(=O)O	-336
393	541-73-1	C1=CC(=CC(=C1)Cl)Cl	28.1
394	401-80-9	C1=CC(=CC(=C1)F)C(F)(F)F	-792.2
395	372-18-9	C1=CC(=CC(=C1)F)F	-309.2
396	618-51-9	C1=CC(=CC(=C1)I)C(=O)O	-219
397	99-05-8	C1=CC(=CC(=C1)N)C(=O)O	-289.3
398	13556-50-8	C1=CC(=CC(=C1)N=[N+]=[N-])N=[N+]=[N-]	745.7
399	554-84-7	C1=CC(=CC(=C1)O)[N+](=O)[O-]	-109.312
400	99-06-9	C1=CC(=CC(=C1)O)C(=O)O	-469.1
401	591-27-5	C1=CC(=CC(=C1)O)N	-98.6
402	108-46-3	C1=CC(=CC(=C1)O)O	-284.7
403	100-25-4	C1=CC(=CC=C1[N+](=O)[O-])[N+](=O)[O-]	55.6
404	100-00-5	C1=CC(=CC=C1[N+](=O)[O-])Cl	39.7
405	100-02-7	C1=CC(=CC=C1[N+](=O)[O-])O	-114.711
406	623-26-7	C1=CC(=CC=C1C#N)C#N	358.3
407	122-04-3	C1=CC(=CC=C1C(=O)Cl)[N+](=O)[O-]	-100.7
408	122-01-0	C1=CC(=CC=C1C(=O)Cl)Cl	-128.9
409	619-80-7	C1=CC(=CC=C1C(=O)N)[N+](=O)[O-]	-108.5
410	62-23-7	C1=CC(=CC=C1C(=O)O)[N+](=O)[O-]	-307.7
411	586-76-5	C1=CC(=CC=C1C(=O)O)Br	-275.9
412	74-11-3	C1=CC(=CC=C1C(=O)O)Cl	-324.8
413	619-58-9	C1=CC(=CC=C1C(=O)O)I	-215.6
414	150-13-0	C1=CC(=CC=C1C(=O)O)N	-293.9
415	99-96-7	C1=CC(=CC=C1C(=O)O)O	-492.6
416	60-18-4	C1=CC(=CC=C1C[C@@H](C(=O)O)N)O	-497
417	2050-68-2	C1=CC(=CC=C1C2=CC=C(C=C2)Cl)Cl	120.25
418	398-23-2	C1=CC(=CC=C1C2=CC=C(C=C2)F)F	-205.4
419	106-46-7	C1=CC(=CC=C1Cl)Cl	24.6
420	540-36-3	C1=CC(=CC=C1F)F	-306.7
421	100-01-6	C1=CC(=CC=C1N)[N+](=O)[O-]	55.242
422	123-30-8	C1=CC(=CC=C1N)O	-90.5
423	1516-60-5	C1=CC(=CC=C1N=[N+]=[N-])[N+](=O)[O-]	394.007
424	123-31-9	C1=CC(=CC=C1O)O	-277
425	100-54-9	C1=CC(=CN=C1)C#N	277.9
426	59-67-6	C1=CC(=CN=C1)C(=O)O	-221.5
427	462-08-8	C1=CC(=CN=C1)N	144.2
428	109-00-2	C1=CC(=CN=C1)O	-43.7
429	2294-47-5	C1=CC(=N[N+]#N)C=CC1=NN=[N-]	748
430	2402-78-0	C1=CC(=NC(=C1)Cl)Cl	71.4
431	72762-00-6	C1=CC(=O)NC=C1	-79.7
432	694-59-7	C1=CC=[N+](C=C1)[O-]	87.9
433	27032-01-5	C1=CC=[N+](C=C1)C(=C=[N-])C#N	523
434	56079-22-2	C1=CC=C(C(=C1)/[N+](=[N+](/C2=CC=CC=C2[N+](=O)[O-])\[O-])/[O-])[N+](=O)[O-]	313
435	528-29-0	C1=CC=C(C(=C1)[N+](=O)[O-])[N+](=O)[O-]	93.7
436	88-73-3	C1=CC=C(C(=C1)[N+](=O)[O-])Cl	62.2
437	88-75-5	C1=CC=C(C(=C1)[N+](=O)[O-])O	-132.33
438	91-15-6	C1=CC=C(C(=C1)C#N)C#N	368.3
439	610-15-1	C1=CC=C(C(=C1)C(=O)N)[N+](=O)[O-]	-138.9
440	552-16-9	C1=CC=C(C(=C1)C(=O)O)[N+](=O)[O-]	-278.9
441	88-65-3	C1=CC=C(C(=C1)C(=O)O)Br	-246.9
442	118-91-2	C1=CC=C(C(=C1)C(=O)O)Cl	-304.2
443	88-67-5	C1=CC=C(C(=C1)C(=O)O)I	-202.8
444	118-92-3	C1=CC=C(C(=C1)C(=O)O)N	-296.2
445	69-72-7	C1=CC=C(C(=C1)C(=O)O)O	-495.8
446	13029-08-8	C1=CC=C(C(=C1)C2=CC=CC=C2Cl)Cl	127.9
447	388-82-9	C1=CC=C(C(=C1)C2=CC=CC=C2F)F	-200.7
448	95-50-1	C1=CC=C(C(=C1)Cl)Cl	33
449	367-11-3	C1=CC=C(C(=C1)F)F	-283
450	615-42-9	C1=CC=C(C(=C1)I)I	252
451	88-74-4	C1=CC=C(C(=C1)N)[N+](=O)[O-]	62.9
452	95-55-6	C1=CC=C(C(=C1)N)O	-104.4
453	33265-60-0	C1=CC=C(C(=C1)N2C=CC=C2)[N+](=O)[O-]	235.7
454	120-80-9	C1=CC=C(C(=C1)O)O	-274.8
455	35506-28-6	C1=CC=C(C=C1)/[N+](=[N+](/C2=CC=CC=C2)\[O-])/[O-]	328
456	1137-96-8	C1=CC=C(C=C1)/C=[N+](/C2=CC=CC=C2)\[O-]	263
457	16212-06-9	C1=CC=C(C=C1)/C=C/S(=O)(=O)C2=CC=CC=C2	-35
458	501-65-5	C1=CC=C(C=C1)C#CC2=CC=CC=C2	385
459	611-38-1	C1=CC=C(C=C1)C([N+](=O)[O-])[N+](=O)[O-]	34.7355
460	2175-90-8	C1=CC=C(C=C1)C(=C2C=CC=C2)C3=CC=CC=C3	402
461	618-32-6	C1=CC=C(C=C1)C(=O)Br	-48.5
462	613-90-1	C1=CC=C(C=C1)C(=O)C#N	117.5
463	611-73-4	C1=CC=C(C=C1)C(=O)C(=O)O	-388.7
464	2243-80-3	C1=CC=C(C=C1)C(=O)C2=CC(=CC=C2)[N+](=O)[O-]	37.6
465	1144-74-7	C1=CC=C(C=C1)C(=O)C2=CC=C(C=C2)[N+](=O)[O-]	39.2
466	119-61-9	C1=CC=C(C=C1)C(=O)C2=CC=CC=C2	49.9
467	614-16-4	C1=CC=C(C=C1)C(=O)CC#N	70.12
468	326-06-7	C1=CC=C(C=C1)C(=O)CC(=O)C(F)(F)F	-865.6
469	120-46-7	C1=CC=C(C=C1)C(=O)CC(=O)C2=CC=CC=C2	-109.2
470	5343-98-6	C1=CC=C(C=C1)C(=O)CCC#N	30
471	98-88-4	C1=CC=C(C=C1)C(=O)Cl	-109
472	618-38-2	C1=CC=C(C=C1)C(=O)I	11
473	55-21-0	C1=CC=C(C=C1)C(=O)N	-100.1
474	93-97-0	C1=CC=C(C=C1)C(=O)OC(=O)C2=CC=CC=C2	-319
475	93-99-2	C1=CC=C(C=C1)C(=O)OC2=CC=CC=C2	-142
476	94-36-0	C1=CC=C(C=C1)C(=O)OOC(=O)C2=CC=CC=C2	-272
477	962-16-3	C1=CC=C(C=C1)C(=O)OOC(=O)OC2=CC=CC=C2	-393
478	2227-79-4	C1=CC=C(C=C1)C(=S)N	147.8
479	69-91-0	C1=CC=C(C=C1)C(C(=O)O)N	-285.4
480	425-32-1	C1=CC=C(C=C1)C(C(C2=CC=CC=C2)(F)F)(F)F	-689
481	630-76-2	C1=CC=C(C=C1)C(C2=CC=CC=C2)(C3=CC=CC=C3)C4=CC=CC=C4	397.95
482	14309-25-2	C1=CC=C(C=C1)C(C2=CC=CC=C2)(C3=CC=CC=C3)N=[N+]=[N-]	610.4
483	632-50-8	C1=CC=C(C=C1)C(C2=CC=CC=C2)C(C3=CC=CC=C3)C4=CC=CC=C4	357
484	519-73-3	C1=CC=C(C=C1)C(C2=CC=CC=C2)C3=CC=CC=C3	273.65
485	579-55-5	C1=CC=C(C=C1)C(C2=CC=CC=C2)F	-42.6
486	4237-48-3	C1=CC=C(C=C1)C(C2=CC=CC=C2)S	190
487	98-08-8	C1=CC=C(C=C1)C(F)(F)F	-581.03
488	63-91-2	C1=CC=C(C=C1)C[C@@H](C(=O)O)N	-319.6
489	622-42-4	C1=CC=C(C=C1)C[N+](=O)[O-]	30.7179
490	538-51-2	C1=CC=C(C=C1)C=NC2=CC=CC=C2	278.7
491	100-52-7	C1=CC=C(C=C1)C=O	-36.8
492	13494-38-7	C1=CC=C(C=C1)C2=C(N(C3=CC=CC=C3[N+]2=O)[O-])C(=O)C4=CC=CC=C4	355.2
493	517-51-1	C1=CC=C(C=C1)C2=C3C=CC=CC3=C(C4=C(C5=CC=CC=C5C(=C24)C6=CC=CC=C6)C7=CC=CC=C7)C8=CC=CC=C8	831.45
494	1499-10-1	C1=CC=C(C=C1)C2=C3C=CC=CC3=C(C4=CC=CC=C42)C5=CC=CC=C5	471.95
495	612-71-5	C1=CC=C(C=C1)C2=CC(=CC(=C2)C3=CC=CC=C3)C4=CC=CC=C4	369.65
496	92-06-8	C1=CC=C(C=C1)C2=CC(=CC=C2)C3=CC=CC=C3	280
497	580-51-8	C1=CC=C(C=C1)C2=CC(=CC=C2)O	21
498	135-70-6	C1=CC=C(C=C1)C2=CC=C(C=C2)C3=CC=C(C=C3)C4=CC=CC=C4	400
499	92-94-4	C1=CC=C(C=C1)C2=CC=C(C=C2)C3=CC=CC=C3	281.7
500	16212-85-4	C1=CC=C(C=C1)C2=CC=C(SS2)C3=CC=CC=C3	422.4
501	84-15-1	C1=CC=C(C=C1)C2=CC=CC=C2C3=CC=CC=C3	282.8
502	90-41-5	C1=CC=C(C=C1)C2=CC=CC=C2N	184.41
503	90-43-7	C1=CC=C(C=C1)C2=CC=CC=C2O	17
504	1006-67-3	C1=CC=C(C=C1)C2=CC=NO2	160
505	18039-45-7	C1=CC=C(C=C1)C2=NN(N=N2)C3=CC=CC=C3	515.1
506	7477-73-8	C1=CC=C(C=C1)C2=NN=NN2C3=CC=CC=C3	527
507	18039-42-4	C1=CC=C(C=C1)C2=NNN=N2	413
508	1006-65-1	C1=CC=C(C=C1)C2=NOC=C2	139
509	100-39-0	C1=CC=C(C=C1)CBr	84
510	38677-56-4	C1=CC=C(C=C1)CC([N+](=O)[O-])([N+](=O)[O-])[N+](=O)[O-]	65.7
511	6023-46-7	C1=CC=C(C=C1)CC(C#N)(C#N)C#N	540.75
512	2294-94-2	C1=CC=C(C=C1)CC(C2=CC=CC=C2)(C3=CC=CC=C3)C4=CC=CC=C4	365
513	350-62-9	C1=CC=C(C=C1)CC(C2=CC=CC=C2)(F)F	-260.5
514	21249-93-4	C1=CC=C(C=C1)CC(F)(F)F	-623.85
515	22272-48-6	C1=CC=C(C=C1)CC2=CC(=CC=C2)O	48.87
516	101-53-1	C1=CC=C(C=C1)CC2=CC=C(C=C2)O	63.51
517	101-81-5	C1=CC=C(C=C1)CC2=CC=CC=C2	151.95
518	28994-41-4	C1=CC=C(C=C1)CC2=CC=CC=C2O	49.71
519	146377-62-0	C1=CC=C(C=C1)CCC(F)F	-414.4
520	100-44-7	C1=CC=C(C=C1)CCl	19
521	350-50-5	C1=CC=C(C=C1)CF	-126.27
522	620-05-3	C1=CC=C(C=C1)CI	127.3
523	100-46-9	C1=CC=C(C=C1)CN	87.8
524	23162-99-4	C1=CC=C(C=C1)CN(F)F	7
525	622-79-7	C1=CC=C(C=C1)CN=[N+]=[N-]	405.011
526	5426-62-0	C1=CC=C(C=C1)CNCCC(=O)O	-311.4
527	100-51-6	C1=CC=C(C=C1)CO	-94.6
528	100-53-8	C1=CC=C(C=C1)CS	93.1
529	620-32-6	C1=CC=C(C=C1)CS(=O)(=O)CC2=CC=CC=C2	-157.1
530	538-74-9	C1=CC=C(C=C1)CSCC2=CC=CC=C2	193
531	591-50-4	C1=CC=C(C=C1)I	165
532	20357-59-9	C1=CC=C(C=C1)N(/C=C/2\C=CC=CC2=O)O	53.9
533	603-34-9	C1=CC=C(C=C1)N(C2=CC=CC=C2)C3=CC=CC=C3	327
534	3088-05-9	C1=CC=C(C=C1)N(CC(COC2=CC=CC=C2)O)CC(COC3=CC=CC=C3)O	-436.8
535	495-48-7	C1=CC=C(C=C1)N=[N+](C2=CC=CC=C2)[O-]	342
536	103-71-9	C1=CC=C(C=C1)N=C=O	-14.5
537	586-96-9	C1=CC=C(C=C1)N=O	201.298
538	5378-52-9	C1=CC=C(C=C1)N2C=NN=N2	448
539	961-68-2	C1=CC=C(C=C1)NC2=C(C=C(C=C2)[N+](=O)[O-])[N+](=O)[O-]	177.6
540	122-39-4	C1=CC=C(C=C1)NC2=CC=CC=C2	202
541	119-75-5	C1=CC=C(C=C1)NC2=CC=CC=C2[N+](=O)[O-]	185.4
542	103-01-5	C1=CC=C(C=C1)NCC(=O)O	-275.6
543	16112-55-3	C1=CC=C(C=C1)NCC(COC2=CC=CC=C2)O	-185
544	100-63-0	C1=CC=C(C=C1)NN	202.9
545	108-95-2	C1=CC=C(C=C1)O	-96.36
546	3155-16-6	C1=CC=C(C=C1)OC(=O)C(=O)OC2=CC=CC=C2	-437.2
547	1864-94-4	C1=CC=C(C=C1)OC=O	-215.7
548	127-63-9	C1=CC=C(C=C1)S(=O)(=O)C2=CC=CC=C2	-118.7
549	10409-06-0	C1=CC=C(C=C1)S(=O)(=O)S(=O)(=O)C2=CC=CC=C2	-481.3
550	945-51-7	C1=CC=C(C=C1)S(=O)C2=CC=CC=C2	107
551	139-66-2	C1=CC=C(C=C1)SC2=CC=CC=C2	232
552	27610-20-4	C1=CC=C(C=C1)SO	-34
553	882-33-7	C1=CC=C(C=C1)SSC2=CC=CC=C2	246
554	68651-46-7	C1=CC=C2C(=C1)C(=C(N2)C3=NC4=CC=CC=C4C3=O)O	31.3
555	605-60-7	C1=CC=C2C(=C1)C(=CC=C2O)N=O	-20.4
556	571-60-8	C1=CC=C2C(=C1)C(=CC=C2O)O	-197
557	73-22-3	C1=CC=C2C(=C1)C(=CN2)C[C@@H](C(=O)O)N	-247.6
558	611-36-9	C1=CC=C2C(=C1)C(=O)C=CN2	20.8
559	491-38-3	C1=CC=C2C(=C1)C(=O)C=CO2	-148.5
560	81-64-1	C1=CC=C2C(=C1)C(=O)C3=C(C=CC(=C3C2=O)O)O	-471
561	17352-37-3	C1=CC=C2C(=C1)C(=O)C3=C(N2)C(=O)C4=CC=CC=C4N3	-66.2
562	84-65-1	C1=CC=C2C(=C1)C(=O)C3=CC=CC=C3C2=O	-75.7
563	578-95-0	C1=CC=C2C(=C1)C(=O)C3=CC=CC=C3N2	34.6
564	90-47-1	C1=CC=C2C(=C1)C(=O)C3=CC=CC=C3O2	-98.2
565	492-22-8	C1=CC=C2C(=C1)C(=O)C3=CC=CC=C3S2	94.3
566	1530-12-7	C1=CC=C2C(=C1)C(C3=CC=CC=C32)C4C5=CC=CC=C5C6=CC=CC=C46	330.1
567	132-86-5	C1=CC=C2C(=C1)C=C(C=C2O)O	-211
568	580-17-6	C1=CC=C2C(=C1)C=C(C=N2)N	208.4
569	20532-03-0	C1=CC=C2C(=C1)C=C(C3=CC=CC=C23)C4=CC5=CC=CC=C5C6=CC=CC=C64	364
570	602-60-8	C1=CC=C2C(=C1)C=C3C=CC=CC3=C2[N+](=O)[O-]	226.9
571	1055-23-8	C1=CC=C2C(=C1)C=C3C=CC=CC3=C2C4=C5C=CC=CC5=CC6=CC=CC=C64	464.65
572	260-94-6	C1=CC=C2C(=C1)C=C3C=CC=CC3=N2	273.9
573	243-24-3	C1=CC=C2C(=C1)C=C3C2=CC4=CC=CC=C4O3	200
574	131-91-9	C1=CC=C2C(=C1)C=CC(=C2N=O)O	36
575	132-53-6	C1=CC=C2C(=C1)C=CC(=C2O)N=O	-5.44
576	574-00-5	C1=CC=C2C(=C1)C=CC(=C2O)O	-200.5
577	59-31-4	C1=CC=C2C(=C1)C=CC(=O)N2	-25.5
578	91-64-5	C1=CC=C2C(=C1)C=CC(=O)O2	-176.8
579	86-57-7	C1=CC=C2C(=C1)C=CC=C2[N+](=O)[O-]	145
580	90-11-9	C1=CC=C2C(=C1)C=CC=C2Br	174.3
581	86-55-5	C1=CC=C2C(=C1)C=CC=C2C(=O)O	-223.1
582	90-13-1	C1=CC=C2C(=C1)C=CC=C2Cl	115
583	90-14-2	C1=CC=C2C(=C1)C=CC=C2I	234
584	90-15-3	C1=CC=C2C(=C1)C=CC=C2O	-30.8
585	85-02-9	C1=CC=C2C(=C1)C=CC3=C2C=CC=N3	233.7
586	218-01-9	C1=CC=C2C(=C1)C=CC3=C2C=CC4=CC=CC=C43	269.25
587	195-19-7	C1=CC=C2C(=C1)C=CC3=C2C4=CC=CC=C4C=C3	293.25
588	230-27-3	C1=CC=C2C(=C1)C=CC3=C2N=CC=C3	250.4
589	53-70-3	C1=CC=C2C(=C1)C=CC3=CC4=C(C=CC5=CC=CC=C54)C=C32	328
590	56-55-3	C1=CC=C2C(=C1)C=CC3=CC4=CC=CC=C4C=C32	291.65
591	271-89-6	C1=CC=C2C(=C1)C=CO2	13.6
592	95-15-8	C1=CC=C2C(=C1)C=CS2	166.28
593	253-82-7	C1=CC=C2C(=C1)C=NC=N2	243.1
594	229-87-8	C1=CC=C2C(=C1)C=NC3=CC=CC=C23	240.5
595	271-44-3	C1=CC=C2C(=C1)C=NN2	243
596	259-79-0	C1=CC=C2C(=C1)C3=CC=CC=C23	417.55
597	84-11-7	C1=CC=C2C(=C1)C3=CC=CC=C3C(=O)C2=O	-46.6
598	486-25-9	C1=CC=C2C(=C1)C3=CC=CC=C3C2=O	52.3
599	191-68-4	C1=CC=C2C(=C1)C3=CC=CC=C3C4=C2C5=CC=CC=C5C6=CC=CC=C64	503
600	217-59-4	C1=CC=C2C(=C1)C3=CC=CC=C3C4=CC=CC=C24	272.15
601	230-17-1	C1=CC=C2C(=C1)C3=CC=CC=C3N=N2	376
602	86-74-8	C1=CC=C2C(=C1)C3=CC=CC=C3N2	205
603	132-64-9	C1=CC=C2C(=C1)C3=CC=CC=C3O2	47.3
604	132-65-0	C1=CC=C2C(=C1)C3=CC=CC=C3S2	213.2
605	206-44-0	C1=CC=C2C(=C1)C3=CC=CC4=C3C2=CC=C4	290.2
606	192-97-2	C1=CC=C2C(=C1)C3=CC=CC4=C3C5=C(C=CC=C25)C=C4	330.7
607	2423-66-7	C1=CC=C2C(=C1)N(C=C[N+]2=O)[O-]	227.1
608	2213-63-0	C1=CC=C2C(=C1)N=C(C(=N2)Cl)Cl	202.9
609	304-81-4	C1=CC=C2C(=C1)N=C3C=CC=CC3=[N+]2[O-]	297.3
610	92-82-0	C1=CC=C2C(=C1)N=C3C=CC=CC3=N2	338.3
611	91-19-0	C1=CC=C2C(=C1)N=CC=N2	240.3
612	273-53-0	C1=CC=C2C(=C1)N=CO2	45.14
613	95-16-9	C1=CC=C2C(=C1)N=CS2	204.17
614	273-59-6	C1=CC=C2C(=C1)N=NO2	300.7
615	51-17-2	C1=CC=C2C(=C1)NC=N2	181.7
616	135-67-1	C1=CC=C2C(=C1)NC3=CC=CC=C3O2	94
617	92-84-2	C1=CC=C2C(=C1)NC3=CC=CC=C3S2	278.2
618	39227-54-8	C1=CC=C2C(=C1)OC3=C(O2)C=C(C=C3)Cl	-74.1
619	262-12-4	C1=CC=C2C(=C1)OC3=CC=CC=C3O2	-59.2
620	262-20-4	C1=CC=C2C(=C1)OC3=CC=CC=C3S2	125.8
621	130-15-4	C1=CC=C2C(=O)C=CC(=O)C2=C1	-97.5
622	92-44-4	C1=CC=C2C=C(C(=CC2=C1)O)O	-192.8
623	580-13-2	C1=CC=C2C=C(C=CC2=C1)Br	175.6
624	93-09-4	C1=CC=C2C=C(C=CC2=C1)C(=O)O	-232.5
625	91-58-7	C1=CC=C2C=C(C=CC2=C1)Cl	137
626	612-55-5	C1=CC=C2C=C(C=CC2=C1)I	235
627	135-19-3	C1=CC=C2C=C(C=CC2=C1)O	-29.9
628	260-36-6	C1=CC=C2C=C3C(=CC2=C1)C=CC=N3	243.5
629	120-12-7	C1=CC=C2C=C3C=CC=CC3=CC2=C1	230.9
630	215-58-7	C1=CC=C2C=C3C4=CC=CC=C4C5=CC=CC=C5C3=CC2=C1	331
631	207-08-9	C1=CC=C2C=C3C4=CC=CC5=C4C(=CC=C5)C3=CC2=C1	306.2
632	4753-55-3	C1=CC=C2C=CC=CC(=C1)N2	367
633	4759-11-9	C1=CC=C2C=CC=CC(=C1)O2	200
634	119-65-3	C1=CC=C2C=NC=CC2=C1	204.61
635	253-52-1	C1=CC=C2C=NN=CC2=C1	329.9
636	50-32-8	C1=CC=C2C3=C4C(=CC2=C1)C=CC5=C4C(=CC=C5)C=C3	296.9
637	20847-82-9	C1=CC=C2C3C=CC3C2=C1	399
638	477-75-8	C1=CC=C2C3C4=CC=CC=C4C(C2=C1)C5=CC=CC=C35	321.9
639	257-55-6	C1=CC=CC2=CC=CC=CC=C2C=C1	551.5
640	100-70-9	C1=CC=NC(=C1)C#N	280.7
641	366-18-7	C1=CC=NC(=C1)C2=CC=CC=N2	267.9
642	581-47-5	C1=CC=NC(=C1)C2=CC=NC=C2	284.2
643	1148-79-4	C1=CC=NC(=C1)C2=NC(=CC=C2)C3=CC=CC=N3	394.6
644	504-29-0	C1=CC=NC(=C1)N	118.1
645	289-80-5	C1=CC=NN=C1	278.4
646	18771-85-2	C1=CC2=[N+](ON=C2C(=C1)[N+](=O)[O-])[O-]	299.9
647	17348-69-5	C1=CC2=[N+](ON=C2C=C1Cl)[O-]	274.7
648	521-74-4	C1=CC2=C(C(=C(C=C2Br)Br)O)N=C1	76.8
649	7640-33-7	C1=CC2=C(C(=C(C=C2Cl)Br)O)N=C1	-14.5
650	773-76-2	C1=CC2=C(C(=C(C=C2Cl)Cl)O)N=C1	-48.8
651	83-73-8	C1=CC2=C(C(=C(C=C2I)I)O)N=C1	220.3
652	578-66-5	C1=CC2=C(C(=C1)N)N=CC=C2	187.6
653	148-24-3	C1=CC2=C(C(=C1)O)N=CC=C2	6.5
654	580-15-4	C1=CC2=C(C=CC(=C2)N)N=C1	206.1
655	35975-00-9	C1=CC2=C(C=CC(=C2N)[N+](=O)[O-])N=C1	181
656	4008-48-4	C1=CC2=C(C=CC(=C2N=C1)O)[N+](=O)[O-]	-1.7
657	130-16-5	C1=CC2=C(C=CC(=C2N=C1)O)Cl	-25.5
658	86-98-6	C1=CC2=C(C=CN=C2C=C1Cl)Cl	139.4
659	6146-52-7	C1=CC2=C(C=CN2)C=C1[N+](=O)[O-]	136.9
660	208-96-8	C1=CC2=C3C(=C1)C=CC3=CC=C2	261.45
661	129-00-0	C1=CC2=C3C(=C1)C=CC4=CC=CC(=C43)C=C2	225.6
662	198-55-0	C1=CC2=C3C(=C1)C4=CC=CC5=C4C(=CC=C5)C3=CC=C2	317.4
663	5821-51-2	C1=CC2=C3C4=C1C=CC5=C4C6=C(C=C5)C=CC(=C36)C=C2	458.7
664	191-07-1	C1=CC2=C3C4=C1C=CC5=C4C6=C(C=C5)C=CC7=C6C3=C(C=C2)C=C7	297.95
665	95-14-7	C1=CC2=NNN=C2C=C1	335.5
666	480-96-6	C1=CC2=NO[N+](=C2C=C1)[O-]	298.5
667	273-09-6	C1=CC2=NON=C2C=C1	300.2
668	6053-74-3	C1=CC2C=CC3C2C1C=C3	224
669	4533-42-0	C1=CN(C=C1)C2=CC=C(C=C2)[N+](=O)[O-]	205.5
670	98-97-5	C1=CN=C(C=N1)C(=O)O	-167.6
671	1122-61-8	C1=CN=CC=C1[N+](=O)[O-]	131.7
672	100-48-1	C1=CN=CC=C1C#N	283.5
673	553-26-4	C1=CN=CC=C1C2=CC=NC=C2	293.1
674	504-24-5	C1=CN=CC=C1N	129.9
675	39910-67-3	C1=CN=CC=C1N=[N+]=[N-]	470.1
676	289-95-2	C1=CN=CN=C1	195.8
677	288-32-4	C1=CN=CN1	129.5
678	66-22-8	C1=CNC(=O)NC1=O	-303.1
679	109-97-7	C1=CNC=C1	143.2
680	626-64-2	C1=CNC=CC1=O	-30.3
681	288-13-1	C1=CNN=C1	177.4
682	623-30-3	C1=COC(=C1)/C=C/C=O	-106
683	609-39-2	C1=COC(=C1)[N+](=O)[O-]	-28.9
684	98-01-1	C1=COC(=C1)C=O	-149.6
685	98-00-0	C1=COC(=C1)CO	-212
686	110-00-9	C1=COC=C1	-27.7
687	288-42-6	C1=COC=N1	-15.5
688	288-14-2	C1=CON=C1	82
689	4552-64-1	C1=CSC(=C1)C(=CC(=O)C(F)(F)F)S	-630.3
690	110-02-1	C1=CSC=C1	218.4
691	290-87-9	C1=NC=NC=N1	225.87
692	288-88-0	C1=NC=NN1	192.7
693	73-40-5	C1=NC2=C(N1)C(=O)NC(=N2)N	16
694	73-24-5	C1=NC2=NC=NC(=C2N1)N	225.7
695	461-89-2	C1=NNC(=O)NC1=O	-165.9
696	288-94-8	C1=NNN=N1	320
697	75262-87-2	C12(C(C(C(C1(F)F)(F)F)(F)F)(C(C(C(C2(F)F)(F)F)(F)F)(F)F)F)F	-3214.6
698	54939-04-7	C12=C(C(C(C(C1(F)F)(F)F)(F)F)(F)F)C(C(C(C2(F)F)(F)F)(F)F)(F)F	-3203.6
699	32846-66-5	C12C3C4C1(C5C2C3(C45)C(=O)O)C(=O)O	-229.4
700	277-10-1	C12C3C4C1C5C2C3C45	609.6
701	67-52-7	C1C(=O)NC(=O)NC1=O	-509.7
702	502-97-6	C1C(=O)OCC(=O)O1	-615.6
703	3899-71-6	C1C(C1(F)F)(F)F	-650
704	89066-32-0	C1C(CC1I)I	193
705	97645-24-4	C1C(CN1[N+](=O)[O-])([N+](=O)[O-])[N+](=O)[O-]	110.6
706	78-71-7	C1C(CO1)(CCl)CCl	-204
707	106-89-8	C1C(O1)CCl	-108
708	122-60-1	C1C(O1)COC2=CC=CC=C2	-99.7
709	2930-05-4	C1C(O1)COCC2=CC=CC=C2	-138
710	37014-01-0	C1C(SC(CC1=O)C2=CC=CC=C2)C3=CC=CC=C3	84.1
711	18012-46-9	C1C/2C1/C=C\C=C/C=C2	372
712	1700-10-3	C1C/C=C\C=C/CC1	84.1
713	147-85-3	C1C[C@H](NC1)C(=O)O	-389.5
714	2781-85-3	C1C=C1	277.1
715	542-92-7	C1C=CC=C1	136.65
716	544-25-2	C1C=CC=CC=C1	183.95
717	95-13-6	C1C=CC2=CC=CC=C21	162.3
718	2422-86-8	C1C=CC2C1C=C2	264
719	694-01-9	C1C=CC2C1C2	158
720	77-73-6	C1C=CC2C1C3CC2C=C3	196.2
721	4096-95-1	C1C=CC2CC1C=C2	158
722	628-41-1	C1C=CCC=C1	100.4
723	612-17-9	C1C=CCC2=CC=CC=C21	137.5
724	38451-18-2	C1C=CCC2C1CC=C2	109.2
725	1708-29-8	C1C=CCO1	-63
726	1708-32-3	C1C=CCS1	87.3
727	77-79-2	C1C=CCS1(=O)=O	-255.6
728	7285-32-7	C1C=CS1(=O)=O	-124
729	2443-46-1	C1C2=CC=CC=C1C=CC=C2	315
730	90-44-8	C1C2=CC=CC=C2C(=O)C3=CC=CC=C31	23.4
731	607-57-8	C1C2=CC=CC=C2C3=C1C=C(C=C3)[N+](=O)[O-]	162.4
732	86-73-7	C1C2=CC=CC=C2C3=CC=CC=C31	176.7
733	613-31-0	C1C2=CC=CC=C2CC3=CC=CC=C31	159.7
734	959-02-4	C1C2=CC=CC=C2CC3=CC4=CC=CC=C4C=C31	223.6
735	496-14-0	C1C2=CC=CC=C2CO1	-30.1
736	65754-71-4	C1C2=CC=CC1=CC=CC=C2	400
737	6074-99-3	C1C2C=CC=CC1C=CC=C2	261
738	6343-21-1	C1C2C=CC1C(C2(C#N)C#N)(C#N)C#N	738.9
739	121-46-0	C1C2C=CC1C=C2	246.1
740	3635-94-7	C1C2C=CC1C3C2C3	235
741	16955-35-4	C1C2C1(C2)C#N	304.5
742	5164-35-2	C1C2C1C=C2	333
743	157-33-5	C1C2C1C2	217.1
744	3463-79-4	C1C2C1C3=CC=CC=C3C=C2	238
745	82110-70-1	C1C2C1C3C(C2)C4CC3C5C4C5	185.5
746	79356-83-5	C1C2C1C3C2C=C3	383.9
747	765-72-0	C1C2C3C2C4C1C4C3	180
748	15844-05-0	C1C2C3C4C1C5C2C3C45C(=O)O	3
749	822-41-3	C1C2CC1C=C2	251
750	17684-73-0	C1C2CC1C2(C3=CC=CC=C3)O	135.8
751	16782-44-8	C1C2CC2C3C1C3	151.55
752	55100-59-9	C1C2CC3(CC1CC(C2)(C3)[N+](=O)[O-])[N+](=O)[O-]	-228.2
753	279-19-6	C1C2CC3C1C3C2	82.1
754	30651-03-7	C1C2CC3C4C1C5CC(C4)(CC3C5C2)O	-317.1
755	30545-23-4	C1C2CC3C4C1C5CC(C4)C(=O)C3C5C2	-236.5
756	30545-24-5	C1C2CC3C4C1C5CC(C4)C(C3C5C2)O	-297.6
757	30545-14-3	C1C2CC3C4C1C5CC(C4)CC3(C5C2)O	-310.9
758	2292-79-7	C1C2CC3C4C1C5CC(C4)CC3C5C2	-145.9
759	7575-82-8	C1C2CC3CC1CC(C2)(C3)[N+](=O)[O-]	-191.1
760	23074-42-2	C1C2CC3CC1CC(C2)(C3)C#N	-21
761	5511-18-2	C1C2CC3CC1CC(C2)(C3)C(=O)N	-319
762	828-51-3	C1C2CC3CC1CC(C2)(C3)C(=O)O	-544.4
763	24886-73-5	C1C2CC3CC1CC(C2)(C3)N=[N+]=[N-]	183.008
764	768-95-6	C1C2CC3CC1CC(C2)(C3)O	-311
765	281-23-2	C1C2CC3CC1CC(C2)C3	-134.5
766	88381-75-3	C1C2CC3CC1CC(C2)C3([N+](=O)[O-])[N+](=O)[O-]	-178.992
767	128478-71-7	C1C2CC3CC1CC(C2)C3(C#N)[N+](=O)[O-]	-21
768	54564-31-7	C1C2CC3CC1CC(C2)C3[N+](=O)[O-]	-179.1
769	700-58-3	C1C2CC3CC1CC(C2)C3=O	-231
770	700-57-2	C1C2CC3CC1CC(C2)C3O	-299
771	281-32-3	C1C2CC3CC1OC(O2)O3	-499.2
772	1191-95-3	C1CC(=O)C1	-91.6
773	504-02-9	C1CC(=O)CC(=O)C1	-335.6
774	637-88-7	C1CC(=O)CCC1=O	-332.6
775	19090-03-0	C1CC(=O)CSC1	-133
776	1121-89-7	C1CC(=O)NC(=O)C1	-393.6
777	616-45-5	C1CC(=O)NC1	-197.4
778	123-56-8	C1CC(=O)NC1=O	-375.5
779	108-55-4	C1CC(=O)OC(=O)C1	-532.4
780	96-48-0	C1CC(=O)OC1	-364
781	108-30-5	C1CC(=O)OC1=O	-527.9
782	1003-10-7	C1CC(=O)SC1	-196.2
783	26555-56-6	C1CC(C=C1)C#N	156.4
784	5445-51-2	C1CC(C1)(C(=O)O)C(=O)O	-724.5
785	4426-11-3	C1CC(C1)C#N	147.3
786	2516-34-9	C1CC(C1)N	41
787	2919-23-5	C1CC(C1)O	-145
788	101-68-8	c1cc(ccc1Cc1ccc(cc1)N=C=O)N=C=O	189
789	5124-30-1	C1CC(CCC1CC1CCC(CC1)N=C=O)N=C=O	-311
790	97-99-4	C1CC(OC1)CO	-369
791	4551-51-3	C1CC[C@H]2CCC[C@H]2C1	-129.35
792	3047-38-9	C1CC=C(C1)C#N	141.8
793	3451-55-6	C1CC=C=CCCC=C=C1	358.05
794	822-35-5	C1CC=C1	156.7
795	23057-36-5	C1CC=C2CCC(C1)C2	73.6
796	42206-10-0	C1CC=C2CCC2=C1	222
797	132911-34-3	C1CC=CC(=C2CCCC=C2)C1	91.85
798	13048-17-4	C1CC=CC(C1)C#N	109.7
799	592-57-4	C1CC=CC=C1	105.44
800	4054-38-0	C1CC=CC=CC1	94.3
801	142-29-0	C1CC=CC1	35
802	110-87-2	C1CC=COC1	-112.81
803	5724-81-2	C1CC=NC1	63
804	75-19-4	C1CC1	46.3
805	811462-12-1	C1CC1([N+](=O)[O-])[N+](=O)[O-]	51
806	5009-27-8	C1CC1=O	16
807	765-46-8	C1CC12C=CC=C2	238
808	36262-33-6	C1CC12C=CC3(CC3)C=C2	303
809	31561-59-8	C1CC12C3(C24CC4)CC3	423.6
810	86301-94-2	C1CC12C3CC3C4C2C5C6CC6C4C57CC7	384.3
811	157-40-4	C1CC12CC2	185.15
812	33475-22-8	C1CC12CC23CC3	302.8
813	50874-24-3	C1CC12CC23CC34CC4	429.9
814	129872-30-6	C1CC12CC23CC34CC45CC5	544
815	114546-62-2	C1CC1C#CC#CC2CC2	561.8
816	5500-21-0	C1CC1C#N	182.7
817	19219-01-3	C1CC1C(C#N)(C2CC2)C(C#N)(C3CC3)C4CC4	537
818	26902-55-6	C1CC1C(C2CC2)(C3CC3)C(C4CC4)(C5CC5)C6CC6	466.5
819	873-49-4	C1CC1C2=CC=CC=C2	150.6
820	5685-46-1	C1CC1C2CC2	129.7
821	765-30-0	C1CC1N	77.07
822	31357-71-8	C1CC2(C1C2)C#N	272
823	10563-10-7	C1CC2=C(C1)CC2	173
824	41487-78-9	C1CC2=C1C34C2(C3)CC4	240
825	781-17-9	C1CC2=C3C(=CC=C2)CCC4=CC=CC1=C43	90.2
826	1732-13-4	C1CC2=C3C(=CC=C4C3=C(CCC4)C=C2)C1	40.7
827	5385-36-4	C1CC2=CC(=CC=C2)CCC3=CC=C1C=C3	218.35
828	2319-97-3	C1CC2=CC(=CC=C2)CCC3=CC=CC1=C3	170.25
829	1633-22-3	C1CC2=CC=C(CCC3=CC=C1C=C3)C=C2	244.4
830	2913-24-8	C1CC2=CC=C(CCCC3=CC=C(C1)C=C3)C=C2	129.5
831	694-87-1	C1CC2=CC=CC=C21	199.4
832	447-53-0	C1CC2=CC=CC=C2C=C1	124.8
833	496-11-7	C1CC2=CC=CC=C2C1	60.6
834	776-35-2	C1CC2=CC=CC=C2C3=CC=CC=C31	155.1
835	635-46-1	C1CC2=CC=CC=C2NC1	82
836	493-08-3	C1CC2=CC=CC=C2OC1	-82.4
837	83-32-9	C1CC2=CC=CC3=C2C1=CC=C3	156.4
838	1610-51-1	C1CC2=CC3=C(CC3)C=C21	310
839	35117-21-6	C1CC2=CC3=C(CCC4=CC=C1C=C4)C=C2CCC5=CC=CC(=C5)CC3	409.5
840	5181-34-0	C1CC23C1(C=CC=C2)C=CC=C3	378.3
841	60329-21-7	C1CC23C1(CC=CC2)C=CC=C3	276.6
842	17048-59-8	C1CC23CC=CCC2(C1)C3	95.8
843	3463-81-8	C1CC23CC2(C1)C=CC=C3	190
844	136630-10-9	C1CC23CCC=CC2(C1)C3	96.7
845	19074-25-0	C1CC23CCC2(C1)C3	152
846	82834-02-4	C1CC2C(C1)C3=C2CCC3	155
847	285-67-6	C1CC2C(C1)O2	-97.1
848	75891-10-0	C1CC2C/C=C\CC1C=C2	117
849	1017-93-2	C1CC2C=CC1C(C2(C#N)C#N)(C#N)C#N	687.4
850	3008-13-7	C1CC2C=CC1CC2C#N	152
851	37436-17-2	C1CC2C=CC1N=[N+]2[O-]	221
852	4927-03-1	C1CC2C=CC2C1	139.7
853	31678-74-7	C1CC2C=CC3C2C1C=C3	128
854	57595-39-8	C1CC2C=CC3C2C1CC3	13
855	3725-28-8	C1CC2C1C=CC=C2	189.2
856	185-94-4	C1CC2C1C2	158
857	19446-68-5	C1CC2C1C23CC3	288
858	28102-61-6	C1CC2C1C3C2C3	235
859	7095-65-0	C1CC2C1CC=C2	119
860	187-78-0	c1cc2c3c(ccc4c3c1C=C4)C=C2	408.6
861	25926-99-2	C1CC2C3CC3C1N=[N+]2[O-]	226.1
862	6004-38-2	C1CC2C3CCC(C3)C2C1	-60.1
863	10036-09-6	C1CC2CC(C1)CC(=O)C2	-254
864	6671-66-5	C1CC2CC=CC(C1)C2	-49.1
865	16456-33-0	C1CC2CC=CCC1C2	3.6
866	498-66-8	C1CC2CC1C=C2	90.1
867	1777-44-2	C1CC2CC1C3C2C4CC4C3	59
868	278-74-0	C1CC2CC1C3C2O3	-53.9
869	14252-05-2	C1CC2CC1CC(=O)C2	-221
870	497-38-1	C1CC2CC1CC2=O	-170.6
871	5019-82-9	C1CC2CC1CCC2=O	-218
872	22509-00-8	C1CC2CC1N=[N+]2[O-]	127.8
873	2721-32-6	C1CC2CC1N=N2	196
874	31357-72-9	C1CC2CC2(C1)C#N	142
875	2566-57-6	C1CC2CC2C=C1	119
876	285-58-5	C1CC2CC2C1	38.65
877	7124-86-9	C1CC2CCC(C1)C=C2	-3.5
878	55679-31-7	C1CC2CCC(C1)C2=O	-193
879	22341-17-9	C1CC2CCC(C1)O2	27
880	17530-61-9	C1CC2CCC=C(C1)C2	31
881	4350-84-9	C1CC2CCC1C(=O)O2	-396.6
882	931-64-6	C1CC2CCC1C=C2	23.25
883	279-23-2	C1CC2CCC1C2	-54.85
884	10218-02-7	C1CC2CCC1C2=O	-134
885	2566-48-5	C1CC2CCC1C2O	-218
886	280-33-1	C1CC2CCC1CC2	-99.02
887	2716-23-6	C1CC2CCC1CC2=O	-218
888	18684-63-4	C1CC2CCC1CC2O	-285
889	283-68-1	C1CC2CCC1CCC3CCC(CC3)CC2	-152.2
890	283-24-9	C1CC2CCC1CNC2	-43.68
891	283-27-2	C1CC2CCC1COC2	-222.6
892	25926-96-9	C1CC2CCC1N=[N+]2[O-]	92.4
893	22630-75-7	C1CC2CCC2=C1	167
894	17760-91-7	C1CC2CCC3C2C1CC3	-102.3
895	280-65-9	C1CC2CCCC(C1)C2	-127.5
896	17931-55-4	C1CC2CCCC(C1)C2=O	-240
897	283-50-1	C1CC2CCCC(C1)CC2	-106.05
898	29415-95-0	C1CC2CCCC(C1)CCC2	-88.9
899	643-20-9	C1CC2CCCN2C1	-3.9
900	1540-80-3	C1CCC#CCCCCCC#CCC1	313.8
901	1011-12-7	C1CCC(=C2CCCCC2=O)CC1	-213.8
902	1855-63-6	C1CCC(=CC1)C#N	101.5
903	1502-22-3	C1CCC(=CC1)C2CCCCC2=O	-219.5
904	492-99-9	C1CCC(=NO)C(=NO)C1	-69.66
905	100-64-1	C1CCC(=NO)CC1	-74.88
906	120-92-3	C1CCC(=O)C1	-197.4
907	108-94-1	C1CCC(=O)CC1	-231.1
908	105-60-2	C1CCC(=O)NCC1	-239.6
909	502-44-3	C1CCC(=O)OCC1	-396
910	5401-62-7	C1CCC(C(C1)Br)Br	-109.9
911	18273-20-6	C1CCC(C(C1)N(F)F)N(F)F	-174.1
912	59358-70-2	C1CCC(C1)(C2=CC=CC=C2)C3(CCCC3)C4=CC=CC=C4	111
913	137-43-9	C1CCC(C1)Br	9.83
914	4254-02-8	C1CCC(C1)C#N	48.8
915	1003-03-8	C1CCC(C1)N	-54.86
916	33670-50-7	C1CCC(C1)N=[N+]=[N-]	256.2
917	96-41-3	C1CCC(C1)O	-243
918	1679-07-8	C1CCC(C1)S	-47.78
919	3867-15-0	C1CCC(CC1)(C#N)N2CCCCC2	3.53
920	59358-71-3	C1CCC(CC1)(C2=CC=CC=C2)C3(CCCCC3)C4=CC=CC=C4	44
921	98-95-3	c1ccc(cc1)[N+](=O)[O-]	65.6051
922	1122-60-7	C1CCC(CC1)[N+](=O)[O-]	-159.3
923	100-47-0	c1ccc(cc1)C#N	219
924	766-05-2	C1CCC(CC1)C#N	-3.6
925	384-94-1	c1ccc(cc1)C(c2ccccc2)C(F)(F)F	-516.1
926	92-52-4	c1ccc(cc1)c1ccccc1	180.85
927	827-52-1	C1CCC(CC1)c1ccccc1	-16.65
928	92-51-3	C1CCC(CC1)C1CCCCC1	-217.05
929	90-42-6	C1CCC(CC1)C2CCCCC2=O	-324
930	108-90-7	c1ccc(cc1)Cl	54.42
931	542-18-7	C1CCC(CC1)Cl	-166.5
932	372-46-3	C1CCC(CC1)F	-336.6
933	62-53-3	c1ccc(cc1)N	87.03
934	108-91-8	C1CCC(CC1)N	-98.7
935	622-37-7	c1ccc(cc1)N=[N+]=[N-]	415.011
936	19573-22-9	C1CCC(CC1)N=[N+]=[N-]	210
937	102-09-0	c1ccc(cc1)OC(=O)Oc1ccccc1	-311
938	4427-97-8	C1CCC(CC1)OC(=O)OC1CCCCC1	-764
939	20666-86-8	C1CCC(CC1)OC(=O)OOC(=O)C2=CC=CC=C2	-645.3
940	1561-49-5	C1CCC(CC1)OC(=O)OOC(=O)OC2CCCCC2	-1002
941	766-07-4	C1CCC(CC1)OO	-214.9
942	108-98-5	c1ccc(cc1)S	112.4
943	1569-69-3	C1CCC(CC1)S	-95.73
944	110-83-8	C1CCC=CC1	-4.61
945	628-92-2	C1CCC=CCC1	-9.2
946	287-23-0	C1CCC1	27.7
947	176-63-6	C1CCC2(CC1)CCCC2	-145.1
948	180-43-8	C1CCC2(CC1)CCCCC2	-188.3
949	10563-11-8	C1CCC2=C(C1)CC2	96.2
950	38795-15-2	C1CCC2=CC=CC=C(C1)C2	146
951	1079-71-6	C1CCC2=CC3=C(CCCC3)C=C2C1	-37.2
952	23057-35-4	C1CCC2=CCC(C1)C2	49.8
953	33930-87-9	C1CCC23CCC2(C1)C=CC=C3	157.4
954	85-01-8	c1ccc2c(c1)ccc1ccccc21	204.85
955	1013-08-7	C1CCc2c(C1)ccc1ccccc21	92.3
956	91-22-5	c1ccc2c(c1)cccn2	200.52
957	767-92-0	C1CCC2C(C1)CCCN2	-112.9
958	10500-57-9	C1CCc2c(C1)cccn2	71
959	286-20-4	C1CCC2C(C1)O2	-125.5
960	934-36-1	c1ccc2c(c1)sc(=S)s2	242
961	2164-87-6	C1CCC2C(C1)SC(=S)S2	25
962	286-45-3	C1CCC2C(O2)CC1	-152.3
963	3806-82-4	C1CCC2C=CC2C1	120.5
964	16484-17-6	C1CCC2CC(=O)CC2C1	-249.4
965	286-08-8	C1CCC2CC2C1	1.75
966	278-30-8	C1CCC2CCC2C1	-26.2
967	5661-80-3	C1CCC2CCCC2CC1	-130.8
968	91-20-3	c1ccc2ccccc2c1	150.45
969	119-64-2	C1CCc2ccccc2C1	25
970	502-42-1	C1CCCC(=O)CC1	-248
971	502-49-8	C1CCCC(=O)CCC1	-272.2
972	5698-29-3	C1CCCC(=O)OCCC1	-434
973	59358-73-5	C1CCCC(CCC1)(C2=CC=CC=C2)C3(CCCCCCC3)C4=CC=CC=C4	69
974	287-92-3	C1CCCC1	-76.4
975	4384-23-0	C1CCCC2=CC=C(CCCCCCC3=CC=C(CC1)C=C3)C=C2	-77.35
976	4925-71-7	C1CCCC2C(O2)CC1	-165.1
977	13757-43-2	C1CCCC2CC2CC1	-27.6
978	3350-30-9	C1CCCCC(=O)CCC1	-279.7
979	1502-06-3	C1CCCCC(=O)CCCC1	-305.1
980	71-43-2	c1ccccc1	82.75
981	110-82-7	C1CCCCC1	-123.35
982	6169-94-4	C1CCCCC2=CC=C(CC3=CC=C(CCC1)C=C3)C=C2	29
983	878-13-7	C1CCCCCC(=O)CCCC1	-322
984	830-13-7	C1CCCCCC(=O)CCCCC1	-359.3
985	947-05-7	C1CCCCCC(=O)OCCCCC1	-540
986	291-64-5	C1CCCCCC1	-118.1
987	292-64-8	C1CCCCCCC1	-125.25
988	293-55-0	C1CCCCCCCC1	-132.8
989	293-96-9	C1CCCCCCCCC1	-154.3
990	294-41-7	C1CCCCCCCCCC1	-179.4
991	294-62-2	C1CCCCCCCCCCC1	-230.3
992	295-02-3	C1CCCCCCCCCCCC1	-246.4
993	295-17-0	C1CCCCCCCCCCCCC1	-239.2
994	295-48-7	C1CCCCCCCCCCCCCC1	-301.4
995	295-65-8	C1CCCCCCCCCCCCCCC1	-321.7
996	295-97-6	C1CCCCCCCCCCCCCCCC1	-364.3
997	1725-04-8	C1CCCCCCOC(=O)CCCCC1	-569
998	1725-03-7	C1CCCCCOC(=O)CCCC1	-514.5
999	6008-27-1	C1CCCCOC(=O)CCC1	-470
1000	111-49-9	C1CCCNCC1	-45
1001	539-87-7	C1CCCOC(=O)CC1	-411
1002	7119-94-0	C1CCN(CC1)[N+](=O)[O-]	-37.1121
1003	5766-79-0	C1CCN(CC1)C(C#N)C2=CC=CC=C2	190.1
1004	5247-14-3	C1CCN(CC1)c2[nH]c3c(n2)nc(nc3N4CCOCC4)N5CCCCC5	482
1005	3010-03-5	C1CCN(CC1)CC#N	83
1006	100-75-4	C1CCN(CC1)N=O	17
1007	123-75-1	C1CCNC1	-3.4
1008	110-86-1	c1ccncc1	140.2
1009	110-89-4	C1CCNCC1	-47.15
1010	542-28-9	C1CCOC(=O)C1	-376
1011	109-99-9	C1CCOC1	-184.2
1012	142-68-7	C1CCOCC1	-223.8
1013	110-01-0	C1CCSC1	-33.6
1014	1613-51-0	C1CCSCC1	-63.3
1015	42525-65-5	C1CN(C1)CCC2=CC=CC=C2	185.2
1016	4164-37-8	C1CN(CCN1[N+](=O)[O-])[N+](=O)[O-]	64.6846
1017	140-79-4	C1CN(CCN1N=O)N=O	194.184
1018	5754-91-6	C1CN(CN1[N+](=O)[O-])[N+](=O)[O-]	114.1
1019	100-76-5	C1CN2CCC1CC2	-4.3
1020	280-57-9	C1CN2CCN1CC2	90.4
1021	1606-49-1	C1CNC=NC1	55.1
1022	930-21-2	C1CNC1=O	-96
1023	32692-19-6	C1CNC2=C1C=C(C=C2)[N+](=O)[O-]	92.9
1024	290-37-9	c1cnccn1	196.1
1025	110-85-0	C1CNCCN1	25
1026	4122-45-6	C1CO[N+](=C1[N+](=O)[O-])[O-]	20
1027	75-21-8	C1CO1	-52.63
1028	872-36-6	c1coc(=O)o1	-418.61
1029	96-49-1	C1COC(=O)O1	-503
1030	936-51-6	C1COC(O1)C2=CC=CC=C2	-205.3
1031	39239-93-5	C1COC(OC1)CO	-554
1032	1191-99-7	C1COC=C1	-77
1033	503-30-0	C1COC1	-80.54
1034	57-57-8	C1COC1=O	-286.2
1035	496-16-2	C1COC2=CC=CC=C21	-46.5
1036	493-05-0	C1COCC2=CC=CC=C21	-63.1
1037	4164-32-3	C1COCCN1[N+](=O)[O-]	-131
1038	59-89-2	C1COCCN1N=O	-88
1039	123-91-1	C1COCCO1	-315.3
1040	294-93-9	C1COCCOCCOCCO1	-631.1
1041	33100-27-5	C1COCCOCCOCCOCCO1	-799.5
1042	646-06-0	C1COCO1	-301.7
1043	505-22-6	C1COCOC1	-338.4
1044	1779-19-7	C1COCOCCO1	-467.2
1045	1121-14-8	C1CON=C1[N+](=O)[O-]	39
1046	1192-16-1	C1CS(=O)(=O)C=C1	-262
1047	420-12-2	C1CS1	82.3
1048	2314-40-1	c1csc(=O)s1	-15
1049	2080-58-2	C1CSC(=O)S1	-125.9
1050	930-35-8	c1csc(=S)s1	253
1051	822-38-8	C1CSC(=S)S1	93.8
1052	1748-15-8	C1CSC(=S)SC1	77.5
1053	1120-59-8	C1CSC=C1	90.7
1054	1003-04-9	C1CSCC1=O	-135.3
1055	1072-72-6	C1CSCCC1=O	-155
1056	2691-41-0	C1N(CN(CN(CN1[N+](=O)[O-])[N+](=O)[O-])[N+](=O)[O-])[N+](=O)[O-]	247.7
1057	121-82-4	C1N(CN(CN1[N+](=O)[O-])[N+](=O)[O-])[N+](=O)[O-]	191.585
1058	13980-04-6	C1N(CN(CN1N=O)N=O)N=O	394.646
1059	100-97-0	C1N2CN3CN1CN(C2)C3	199
1060	2620-44-2	C1OC2=C(O1)C=C(C=C2)[N+](=O)[O-]	-176
1061	110-88-3	C1OCOCO1	-465.76
1062	293-30-1	C1OCOCOCO1	-620.24
1063	16528-92-0	C1OCOCOCOCO1	-779.8
1064	74-83-9	CBr	-34.3
1065	74-84-0	CC	-84.1
1066	74-99-7	CC#C	185.15
1067	503-17-3	CC#CC	146.85
1068	2809-69-0	CC#CC#CC	377.4
1069	116316-76-8	CC#CC#CC1CC1	484.7
1070	673-32-5	CC#CC1=CC=CC=C1	268.2
1071	14027-53-3	CC#CS(=O)(=O)C1=CC=C(C=C1)C	10.4
1072	2525-41-9	CC#CS(=O)(=O)C1=CC=CC=C1	43.5
1073	75-05-8	CC#N	74.04
1074	595-86-8	CC([N+](=O)[O-])([N+](=O)[O-])[N+](=O)[O-]	-50.9
1075	2972-95-4	CC([N+](=O)[O-])([N+](=O)[O-])Cl	-113
1076	13214-58-9	CC([N+](=O)[O-])([N+](=O)[O-])F	-256
1077	600-40-8	CC([N+](=O)[O-])[N+](=O)[O-]	-88.3
1078	563-79-1	CC(=C(C)C)C	-69
1079	34454-78-9	CC(=C(C)O)C	-241
1080	83615-93-4	CC(=C(C=C)C=C)C	129
1081	41233-74-3	CC(=C)/C=C/C(=C)C	95.8
1082	115-11-7	CC(=C)C	-17.4
1083	78-80-8	CC(=C)C#C	259
1084	5187-81-5	CC(=C)C#CC#CC(=C)C	494.1
1085	513-81-5	CC(=C)C(=C)C	50.85
1086	79-39-0	CC(=C)C(=O)N	-157.7
1087	79-41-4	CC(=C)C(=O)O	-367.3
1088	80-62-6	CC(=C)C(=O)OC	-348.7
1089	106-91-2	CC(=C)C(=O)OCC1CO1	-394.2
1090	594-56-9	CC(=C)C(C)(C)C	-85.6
1091	78-79-5	CC(=C)C=C	75.6
1092	78-85-3	CC(=C)C=O	-106.4
1093	98-83-9	CC(=C)C1=CC=CC=C1	113.8
1094	107-39-1	CC(=C)CC(C)(C)C	-110.2
1095	557-98-2	CC(=C)Cl	-24.7
1096	29456-04-0	CC(=C)O	-176
1097	116-11-0	CC(=C)OC	-148.6
1098	598-25-4	CC(=C=C)C	129.07
1099	2175-91-9	CC(=C1C=CC=C1)C	134.4
1100	10514-79-1	CC(=C1CCC=C1)C	49.4
1101	141-79-7	CC(=CC(=O)C)C	-178.28
1102	20771-72-6	CC(=CC(=O)C)Nc1ccc(cc1)[N+](=O)[O-]	-98.9
1103	107-40-4	CC(=CC(C)(C)C)C	-105
1104	764-13-6	CC(=CC=C(C)C)C	-19.2
1105	768-49-0	CC(=CC1=CC=CC=C1)C	86.1
1106	56640-70-1	CC(=CO)C	-207
1107	16087-30-2	CC(=NCCN=C(C)CC(=O)C1=CC=CC=C1)CC(=O)C2=CC=CC=C2	-104.5
1108	122-57-6	CC(=O)/C=C/C1=CC=CC=C1	-48.1
1109	506-96-7	CC(=O)Br	-196
1110	67-64-1	CC(=O)C	-218.5
1111	431-03-8	CC(=O)C(=O)C	-326.8
1112	75-97-8	CC(=O)C(C)(C)C	-290
1113	865-66-7	CC(=O)C(C)(C)C(C)(C)C	-347.7
1114	78-94-4	CC(=O)C=C	-115
1115	78-98-8	CC(=O)C=O	-271
1116	121-89-1	CC(=O)C1=CC(=CC=C1)[N+](=O)[O-]	-99.4
1117	586-37-8	CC(=O)C1=CC(=CC=C1)OC	-237.7
1118	100-19-6	CC(=O)C1=CC=C(C=C1)[N+](=O)[O-]	-99.1
1119	100-06-1	CC(=O)C1=CC=C(C=C1)OC	-241.1
1120	98-86-2	CC(=O)C1=CC=CC=C1	-86.7
1121	579-74-8	CC(=O)C1=CC=CC=C1OC	-232
1122	1660-04-4	CC(=O)C12CC3CC(C1)CC(C3)C2	-298.3
1123	765-43-5	CC(=O)C1CC1	-115.3
1124	598-31-2	CC(=O)CBr	-180
1125	123-54-6	CC(=O)CC(=O)C	-384.4
1126	367-57-7	CC(=O)CC(=O)C(F)(F)F	-1001.65
1127	93-91-4	CC(=O)CC(=O)C1=CC=CC=C1	-244.1
1128	590-50-1	CC(=O)CC(C)(C)C	-320.5
1129	625-34-3	CC(=O)CC=O	-326.8
1130	103-79-7	CC(=O)CC1=CC=CC=C1	-94.64
1131	2550-26-7	CC(=O)CCC1=CC=CC=C1	-123.3
1132	3019-04-3	CC(=O)CI	-130.6
1133	75-36-5	CC(=O)Cl	-251.3
1134	15364-56-4	CC(=O)CN(C)C	-180.1
1135	557-99-3	CC(=O)F	-445
1136	507-02-8	CC(=O)I	-125
1137	60-35-5	CC(=O)N	-238.33
1138	79-16-3	CC(=O)NC	-248
1139	591-07-1	CC(=O)NC(=O)N	-441.7
1140	54334-63-3	CC(=O)O.CC(=O)O.C1=CC=C(C=C1)C(C2=CC=CC=C2)(O)O	-537.4
1141	79-20-9	CC(=O)OC	-410
1142	540-88-5	CC(=O)OC(C)(C)C	-516.8
1143	75631-81-1	CC(=O)OC(C1(C=CC(O1)[N+](=O)[O-])OC(=O)C)OC(=O)C	-1285
1144	92-55-7	CC(=O)OC(C1=CC=C(O1)[N+](=O)[O-])OC(=O)C	-772
1145	581-55-5	CC(=O)OC(C1=CC=CC=C1)OC(=O)C	-676.85
1146	613-75-2	CC(=O)OC(C1=CC=CO1)OC(=O)C	-773
1147	108-05-4	CC(=O)OC=C	-313.6
1148	122-79-2	CC(=O)Oc1ccccc1	-279.7
1149	622-45-7	CC(=O)OC1CCCCC1	-507.2
1150	102-76-1	CC(=O)OCC(COC(=O)C)OC(=O)C	-1180.7
1151	110-49-6	CC(=O)OCCOC	-572.6
1152	111-55-7	CC(=O)OCCOC(=O)C	-796.8
1153	628-51-3	CC(=O)OCOC(=O)C	-780.66
1154	3232-39-1	CC(=O)SC(=O)C	-317
1155	62-55-5	CC(=S)N	12.7
1156	2311-14-0	CC(Br)(Br)Br	-4.6
1157	557-91-5	CC(Br)Br	-41
1158	10359-20-3	CC(C#N)(C#N)C#N	422.5
1159	78-97-7	CC(C#N)O	-63.9
1160	62626-83-9	CC(C([N+](=O)[O-])([N+](=O)[O-])[N+](=O)[O-])([N+](=O)[O-])[N+](=O)[O-]	3
1161	815-57-6	CC(C(=O)C)C(=O)C	-428.9
1162	30719-18-7	CC(C(=O)C)I	-160
1163	15351-09-4	CC(C(=O)C1=CC=CC=C1)N(C)C	-69.9
1164	2867-20-1	CC(C(=O)NC(C)C(=O)O)N	-646.3
1165	56-41-7	CC(C(=O)O)N	-419.75
1166	5790-78-3	CC(C(=O)O)N(C)C(=O)C1=NC2=CC=CC=C2N=C1	145
1167	609-02-9	CC(C(=O)OC)C(=O)OC	-768.56
1168	130515-23-0	CC(C(=O)OC)N(C)C	-394.4
1169	20919-97-5	CC(C(C)([N+](=O)[O-])[N+](=O)[O-])([N+](=O)[O-])[N+](=O)[O-]	-104.2
1170	598-71-0	CC(C(C)Br)Br	-102.25
1171	2211-67-8	CC(C(C)Cl)Cl	-202.2
1172	595-49-3	CC(C)([N+](=O)[O-])[N+](=O)[O-]	-134.3
1173	690-94-8	CC(C)(C#CC=C)O	46.2
1174	14906-26-4	CC(C)(C#CC=C)OO	127.1
1175	7321-55-3	CC(C)(C#N)C#N	197.2
1176	3333-52-6	CC(C)(C#N)C(C)(C)C#N	100.6
1177	2273-41-8	CC(C)(C#N)N1CCCCC1	24.03
1178	76474-09-4	CC(C)(C#N)OC	-125.4
1179	595-46-0	CC(C)(C(=O)O)C(=O)O	-735.2
1180	6065-54-9	CC(C)(C(=O)OC)C(=O)OC	-802.74
1181	140653-59-4	CC(C)(C(=O)OC)N(C)C	-452.4
1182	3964-18-9	CC(C)(C(C)(C)[N+](=O)[O-])[N+](=O)[O-]	-238.5
1183	133930-64-0	CC(C)(C(C)(C)N=NC1=CC=CC=C1)N=NC2=CC=CC=C2	477
1184	76-09-5	CC(C)(C(C)(C)O)O	-540.4
1185	65184-58-9	CC(C)(C(C)(C)OC=O)O	-676.3
1186	3376-24-7	CC(C)(C)/[N+](=C/C1=CC=CC=C1)/[O-]	30.9
1187	3585-88-4	CC(C)(C)[N+](=CC1=CC=C(C=C1)[N+](=O)[O-])[O-]	11.1
1188	594-70-7	CC(C)(C)[N+](=O)[O-]	-175.31
1189	507-19-7	CC(C)(C)Br	-132.4
1190	463-82-1	CC(C)(C)C	-167.95
1191	917-92-0	CC(C)(C)C#C	106.1
1192	630-18-2	CC(C)(C)C#N	-3.3
1193	3378-20-9	CC(C)(C)C(=C)C(=C)C(C)(C)C	-71
1194	32398-67-7	CC(C)(C)C(=O)C#CC1=CC=CC=C1	64.6
1195	815-24-7	CC(C)(C)C(=O)C(C)(C)C	-345.9
1196	1118-71-4	CC(C)(C)C(=O)CC(=O)C(C)(C)C	-528.4
1197	754-10-9	CC(C)(C)C(=O)N	-313.1
1198	24331-71-3	CC(C)(C)C(=O)N(C)C	-286.3
1199	75-98-9	CC(C)(C)C(=O)O	-505.8
1200	598-98-1	CC(C)(C)C(=O)OC	-492.8
1201	4210-60-0	CC(C)(C)C(C#N)C#N	126.7
1202	162047-91-8	CC(C)(C)C(C#N)OC	-164.7
1203	62850-21-9	CC(C)(C)C(C(C(C)(C)C)C(C)(C)C)C(C)(C)C	-251
1204	41902-42-5	CC(C)(C)C(C(C)(C)C)(C(C)(C)C)O	-396.9
1205	35660-96-9	CC(C)(C)C(C(C)(C)C)C(C)(C)C	-235.2
1206	14609-79-1	CC(C)(C)C(C(C)(C)C)O	-424.4
1207	594-82-1	CC(C)(C)C(C)(C)C	-226.1
1208	65149-84-0	CC(C)(C)C(C)(C)C(C)(C)C(C)(C)C	-248.3
1209	558-37-2	CC(C)(C)C=C	-60
1210	128-39-2	CC(C)(C)C1=C(C(=CC=C1)C(C)(C)C)O	-262
1211	4074-25-3	CC(C)(C)C1=CC(=C(C(=C1)C(C)(C)C)[N+](=O)[O-])C(C)(C)C	-212.7
1212	24973-59-9	CC(C)(C)C1=CC(=C(C(=C1)C(C)(C)C)N=O)C(C)(C)C	-117.4
1213	732-26-3	CC(C)(C)C1=CC(=C(C(=C1)C(C)(C)C)O)C(C)(C)C	-369.8
1214	1020-31-1	CC(C)(C)C1=CC(=C(C(=C1)O)O)C(C)(C)C	-470.5
1215	5875-45-6	CC(C)(C)C1=CC(=C(C=C1)C(C)(C)C)O	-260
1216	96-76-4	CC(C)(C)C1=CC(=C(C=C1)O)C(C)(C)C	-290
1217	98-29-3	CC(C)(C)C1=CC(=C(C=C1)O)O	-374.7
1218	16225-26-6	CC(C)(C)C1=CC(=CC(=C1)C(=O)O)C(C)(C)C	-516.3
1219	1460-02-2	CC(C)(C)C1=CC(=CC(=C1)C(C)(C)C)C(C)(C)C	-243
1220	1138-52-9	CC(C)(C)C1=CC(=CC(=C1)O)C(C)(C)C	-300
1221	1014-60-4	CC(C)(C)C1=CC(=CC=C1)C(C)(C)C	-129.7
1222	585-34-2	CC(C)(C)C1=CC(=CC=C1)O	-185.2
1223	98-73-7	CC(C)(C)C1=CC=C(C=C1)C(=O)O	-398.5
1224	1012-72-2	CC(C)(C)C1=CC=C(C=C1)C(C)(C)C	-130.3
1225	5171-91-5	CC(C)(C)C1=CC=C(C=C1)C(C)(C)C(C)(C)C2=CC=C(C=C2)C(C)(C)C	-139
1226	98-54-4	CC(C)(C)C1=CC=C(C=C1)O	-186.2
1227	7498-54-6	CC(C)(C)C1=CC=CC(=C1)C(=O)O	-400.8
1228	2416-98-0	CC(C)(C)C1=CC=CC(=C1O)C2=CC=CC=C2	-57.03
1229	98-06-6	CC(C)(C)C1=CC=CC=C1	-23.35
1230	1886-57-3	CC(C)(C)C1=CC=CC=C1[N+](=O)[O-]	-14
1231	1077-58-3	CC(C)(C)C1=CC=CC=C1C(=O)O	-376.1
1232	88-18-6	CC(C)(C)C1=CC=CC=C1O	-199.1
1233	868-91-7	CC(C)(C)CC(=O)C(C)(C)C	-393.9
1234	4436-99-1	CC(C)(C)CC(=O)CC(C)(C)C	-421.2
1235	10250-48-3	CC(C)(C)CC(=O)OC	-512.5
1236	5342-78-9	CC(C)(C)CC(C)(C)[N+](=O)[O-]	-265.3
1237	1070-87-7	CC(C)(C)CC(C)(C)C	-241.75
1238	57905-89-2	CC(C)(C)CC(C)(C)N=NC(C)(C)C	-119
1239	39198-34-0	CC(C)(C)CC(C)(C)N=NC(C)(C)CC(C)(C)C	-197
1240	62108-41-2	CC(C)(C)CC(C)(C)OC	-362.8
1241	762-62-9	CC(C)(C)CC=C	-80.55
1242	1071-81-4	CC(C)(C)CCC(C)(C)C	-285
1243	507-20-0	CC(C)(C)Cl	-179.9
1244	1679-08-9	CC(C)(C)CS	-128.7
1245	558-17-8	CC(C)(C)I	-72
1246	75-64-9	CC(C)(C)N	-120
1247	646-55-9	CC(C)(C)N(F)F	-192
1248	54168-23-9	CC(C)(C)N=[N+](C(C)(C)C)[O-]	-107.6
1249	718-36-5	CC(C)(C)N=CC1=CC=C(C=C1)[N+](=O)[O-]	49.4
1250	927-83-3	CC(C)(C)N=NC(C)(C)C	-36.4
1251	1118-12-3	CC(C)(C)NC(=O)N	-314
1252	5336-24-3	CC(C)(C)NC(=O)NC(C)(C)C	-404.2
1253	75-65-0	CC(C)(C)O	-312.6
1254	1634-04-4	CC(C)(C)OC	-301.1
1255	400-52-2	CC(C)(C)OC(=O)C(F)(F)F	-1098.3
1256	6163-66-2	CC(C)(C)OC(C)(C)C	-361.4
1257	762-75-4	CC(C)(C)OC=O	-456.8
1258	7665-72-7	CC(C)(C)OCC1CO1	-318.8
1259	540-80-7	CC(C)(C)ON=O	-171.585
1260	75-91-2	CC(C)(C)OO	-234.9
1261	110-05-4	CC(C)(C)OOC(C)(C)C	-340.8
1262	14906-32-2	CC(C)(C)OOC(C)(C)C#CC=C	22.7
1263	87047-20-9	CC(C)(C)OOC(C)(C)CCC(C)(C)O	-620.6
1264	23661-84-9	CC(C)(C)OOC(C)(C)CCC(C)(C)OO	-561.8
1265	38578-50-6	CC(C)(C)OOCC(CO)O	-631.2
1266	33415-52-0	CC(C)(C)OOCC1CO1	-265.2
1267	15476-85-4	CC(C)(C)OOCCO	-445.3
1268	14094-12-3	CC(C)(C)S(=O)(=O)C	-473
1269	1886-75-5	CC(C)(C)S(=O)(=O)C(C)(C)C	-546.3
1270	6163-64-0	CC(C)(C)SC	-121
1271	107-47-1	CC(C)(C)SC(C)(C)C	-188.5
1272	35166-82-6	CC(C)(C)SSC	-112
1273	110-06-5	CC(C)(C)SSC(C)(C)C	-200
1274	111869-19-3	CC(C)(C=C=C)C=C=C	340
1275	1889-67-4	CC(C)(C1=CC=CC=C1)C(C)(C)C2=CC=CC=C2	57
1276	32366-26-0	CC(C)(C1=CC=CC=C1)N=[N+]=[N-]	333.005
1277	80-15-9	CC(C)(C1=CC=CC=C1)OO	-78.7
1278	7074-00-2	CC(C)(C1=CC=CC=C1)OOC(=O)C2=CC=CC=C2	-188
1279	594-34-3	CC(C)(CBr)Br	-113.3
1280	594-20-7	CC(C)(Cl)Cl	-176.7
1281	811-93-8	CC(C)(CN)N	-90.25
1282	420-45-1	CC(C)(F)F	-543
1283	77-76-9	CC(C)(OC)OC	-425
1284	14252-46-1	CC(C)(SC1=CC=CC=C1)SC2=CC=CC=C2	262
1285	72-18-4	CC(C)[C@@H](C(=O)O)N	-475.8
1286	79-46-9	CC(C)[N+](=O)[O-]	-139.3
1287	75-26-3	CC(C)Br	-95.6
1288	75-28-5	CC(C)C	-134.3
1289	598-23-2	CC(C)C#C	136.4
1290	78-82-0	CC(C)C#N	22.8
1291	563-78-0	CC(C)C(=C)C	-62.5
1292	563-80-4	CC(C)C(=O)C	-262.7
1293	5857-36-3	CC(C)C(=O)C(C)(C)C	-338.3
1294	565-80-0	CC(C)C(=O)C(C)C	-311.3
1295	7307-03-1	CC(C)C(=O)CC(=O)C	-452.7
1296	7333-23-5	CC(C)C(=O)CC(=O)C(C)(C)C	-510.7
1297	18362-64-6	CC(C)C(=O)CC(=O)C(C)C	-470.4
1298	563-83-7	CC(C)C(=O)N	-282.6
1299	79-31-2	CC(C)C(=O)O	-476.6
1300	547-63-7	CC(C)C(=O)OC	-456.1
1301	1540-38-1	CC(C)C(C(=O)C)C(=O)C	-448.9
1302	464-06-2	CC(C)C(C)(C)C	-204.35
1303	5340-47-6	CC(C)C(C)(C)C(=O)C	-328.4
1304	85688-96-6	CC(C)C(C)(C)C(C)(C#N)C#N	79.33
1305	16747-38-9	CC(C)C(C)(C)C(C)C	-236.15
1306	60302-23-0	CC(C)C(C)(C)CC(C)(C)C	-281
1307	594-60-5	CC(C)C(C)(C)O	-357
1308	1639-01-6	CC(C)C(C)(C)S	-147.9
1309	4383-11-3	CC(C)C(C)(C1=CC=CC=C1)O	-211.3
1310	79-29-8	CC(C)C(C)C	-178.2
1311	1186-53-4	CC(C)C(C)C(C)(C)C	-237.15
1312	565-75-3	CC(C)C(C)C(C)C	-217.2
1313	598-75-4	CC(C)C(C)O	-316.4
1314	2084-18-6	CC(C)C(C)S	-121
1315	61-90-5	CC(C)C[C@@H](C(=O)O)N	-497.6
1316	563-45-1	CC(C)C=C	-27.6
1317	625-65-0	CC(C)C=C(C)C	-88.85
1318	692-70-6	CC(C)C=CC(C)C	-115.4
1319	78-84-2	CC(C)C=O	-215.8
1320	22791-95-3	CC(C)C1=C(C(=CC=C1)C(C)(C)C)O	-241
1321	2078-54-8	CC(C)C1=C(C(=CC=C1)C(C)C)O	-254.1
1322	2138-48-9	CC(C)C1=C(C(=CC=C1)O)O	-350
1323	33574-11-7	CC(C)C1=CC(=C(C(=C1)C(C)C)C(=O)C2=CC=CC=C2)C(C)C	-189
1324	2934-07-8	CC(C)C1=CC(=C(C(=C1)C(C)C)O)C(C)C	-333
1325	35946-91-9	CC(C)C1=CC(=C(C=C1)C(C)C)O	-254.1
1326	2934-05-6	CC(C)C1=CC(=C(C=C1)O)C(C)C	-254.1
1327	717-74-8	CC(C)C1=CC(=CC(=C1)C(C)C)C(C)C	-153.5
1328	26886-05-5	CC(C)C1=CC(=CC(=C1)O)C(C)C	-254.1
1329	5651-47-8	CC(C)C1=CC(=CC=C1)C(=O)O	-375.5
1330	99-62-7	CC(C)C1=CC(=CC=C1)C(C)C	-75.2
1331	618-45-1	CC(C)C1=CC(=CC=C1)O	-175.3
1332	121678-88-4	CC(C)C1=CC=C(C=C1)/C=[N+](/C(C)(C)C)\[O-]	-50.9
1333	536-66-3	CC(C)C1=CC=C(C=C1)C(=O)O	-382.7
1334	100-18-5	CC(C)C1=CC=C(C=C1)C(C)C	-73.3
1335	99-89-8	CC(C)C1=CC=C(C=C1)O	-175.3
1336	98-82-8	CC(C)C1=CC=CC=C1	3.95
1337	6526-72-3	CC(C)C1=CC=CC=C1[N+](=O)[O-]	-6.5
1338	2438-04-2	CC(C)C1=CC=CC=C1C(=O)O	-359.2
1339	88-69-7	CC(C)C1=CC=CC=C1O	-175.3
1340	106562-31-6	CC(C)C1CC2CCC1C=C2	-51.25
1341	91563-76-7	CC(C)c1cccc(c1[N+](=O)[O-])C(C)C	-89.5
1342	2213-32-3	CC(C)CC(=C)C	-83.9
1343	108-10-1	CC(C)CC(=O)C	-301.4
1344	582-62-7	CC(C)CC(=O)C1=CC=CC=C1	-160.7
1345	3002-23-1	CC(C)CC(=O)CC(=O)C	-456.5
1346	108-83-8	CC(C)CC(=O)CC(C)C	-357.7
1347	503-74-2	CC(C)CC(=O)O	-501.9
1348	556-24-1	CC(C)CC(=O)OC	-497.9
1349	540-84-1	CC(C)CC(C)(C)C	-223.95
1350	85668-75-3	CC(C)CC(C)(C1=CC=C(C=C1)C(C)(C)C)C(C)(CC(C)C)C2=CC=C(C=C2)C(C)(C)C	-254
1351	108-08-7	CC(C)CC(C)C	-201.35
1352	1069-53-0	CC(C)CC(C)C(C)C	-242.6
1353	108-11-2	CC(C)CC(C)O	-337.8
1354	85688-86-4	CC(C)CC(CC(C)C)(C#N)C(CC(C)C)(CC(C)C)C#N	-111.7
1355	1692-57-5	CC(C)CC(CN(F)F)N(F)F	-220.9
1356	691-37-2	CC(C)CC=C	-50.37
1357	538-93-2	CC(C)CC1=CC=CC=C1	-21.6
1358	3522-94-9	CC(C)CCC(C)(C)C	-253.15
1359	592-13-2	CC(C)CCC(C)C	-222.55
1360	3524-73-0	CC(C)CCC=C	-65.7
1361	13151-06-9	CC(C)CCCCC=C	-107.7
1362	107-84-6	CC(C)CCCl	-171
1363	123-51-3	CC(C)CCO	-298.8
1364	123-92-2	CC(C)CCOC(=O)C	-514.4
1365	62108-69-4	CC(C)CCOC(=O)C(C)Cl	-574.9
1366	57392-55-9	CC(C)CCOC(=O)C(Cl)(Cl)Cl	-523.4
1367	37587-83-0	CC(C)CCOC(=O)C(Cl)Cl	-519.7
1368	62108-79-6	CC(C)CCOC(=O)CC(C)Cl	-589.9
1369	62108-70-7	CC(C)CCOC(=O)CCCl	-539.3
1370	5326-92-1	CC(C)CCOC(=O)CCl	-516.7
1371	15965-97-6	CC(C)CCOCC1CO1	-328.2
1372	541-31-1	CC(C)CCS	-114.6
1373	544-02-5	CC(C)CCSCCC(C)C	-222
1374	78-81-9	CC(C)CN	-98.62
1375	7283-77-4	CC(C)CN(CC(C)C)C(=S)S	-67.6
1376	997-95-5	CC(C)CN(CC(C)C)N=O	-139.5
1377	110-96-3	CC(C)CNCC(C)C	-180.8
1378	78-83-1	CC(C)CO	-282.6
1379	97-85-8	CC(C)COC(=O)C(C)C	-540.7
1380	62108-67-2	CC(C)COC(=O)C(C)Cl	-549.8
1381	33560-15-5	CC(C)COC(=O)C(Cl)(Cl)Cl	-500.8
1382	37079-08-6	CC(C)COC(=O)C(Cl)Cl	-501.7
1383	62108-76-3	CC(C)COC(=O)CC(C)Cl	-571.1
1384	62030-45-9	CC(C)COC(=O)CCC=C	-437
1385	62108-77-4	CC(C)COC(=O)CCCCl	-576.6
1386	62108-68-3	CC(C)COC(=O)CCCl	-517.6
1387	33021-02-2	CC(C)COC(C)(C)C	-369.6
1388	3814-55-9	CC(C)COCC1CO1	-312.5
1389	542-56-3	CC(C)CON=O	-151
1390	513-44-0	CC(C)CS	-96.48
1391	10495-45-1	CC(C)CS(=O)(=O)CC(C)C	-535.6
1392	592-65-4	CC(C)CSCC(C)C	-179
1393	1518-72-5	CC(C)CSSCC(C)C	-170.9
1394	75-31-0	CC(C)N	-83.7
1395	25022-55-3	CC(C)N(C(C)C)C(=S)S	-17.9
1396	3880-49-7	CC(C)N=NC(C)C	36
1397	691-60-1	CC(C)NC(=O)N	-289.8
1398	108-18-9	CC(C)NC(C)C	-136.3
1399	7287-19-6	CC(C)NC1=NC(=NC(=N1)SC)NC(C)C	7
1400	67-63-0	CC(C)O	-271.6
1401	598-53-8	CC(C)OC	-252
1402	108-21-4	CC(C)OC(=O)C	-491.5
1403	3974-99-0	CC(C)OC(=O)C(Cl)(Cl)Cl	-484.5
1404	62030-44-8	CC(C)OC(=O)CCC=C	-417
1405	17348-59-3	CC(C)OC(C)(C)C	-357.9
1406	108-20-3	CC(C)OC(C)C	-319.3
1407	4285-59-0	CC(C)OC(C)OC(C)C	-525.9
1408	926-65-8	CC(C)OC=C	-174
1409	4016-14-2	CC(C)OCC1CO1	-299.4
1410	541-42-4	CC(C)ON=O	-133
1411	3031-75-2	CC(C)OO	-197.1
1412	75-33-2	CC(C)S	-76.94
1413	4853-74-1	CC(C)S(=O)(=O)C	-433
1414	1551-21-9	CC(C)SC	-89.66
1415	625-80-9	CC(C)SC(C)C	-142
1416	40136-65-0	CC(C)SSC	-79.1
1417	43022-60-2	CC(C)SSC(C)(C)C	-167
1418	42216-58-0	CC(C[N+](=O)[O-])C([N+](=O)[O-])([N+](=O)[O-])[N+](=O)[O-]	-82.1
1419	563-52-0	CC(C=C)Cl	-45.61
1420	41047-48-7	CC(C1=CC=CC=C1)(C(C)(C2=CC=CC=C2)OC)OC	-183
1421	4316-35-2	CC(C1=CC=CC=C1)(OC)OC	-288.5
1422	64198-22-7	CC(CC(C)(C)C)C(=O)OC	-566
1423	13475-82-6	CC(CC(C)(C)C)CC(C)(C)C	-312.9
1424	107-80-2	CC(CCBr)Br	-97.28
1425	1190-22-3	CC(CCCl)Cl	-195
1426	78-87-5	CC(CCl)Cl	-162.8
1427	3452-97-9	CC(CCO)CC(C)(C)C	-388.2
1428	107-88-0	CC(CCO)O	-433
1429	598-29-8	CC(CI)I	35.6
1430	71-55-6	CC(Cl)(Cl)Cl	-145
1431	593-96-4	CC(Cl)Br	-81
1432	75-34-3	CC(Cl)Cl	-132.5
1433	28464-24-6	CC(CN(CC(C)([N+](=O)[O-])[N+](=O)[O-])[N+](=O)[O-])([N+](=O)[O-])[N+](=O)[O-]	-132.665
1434	28464-26-8	CC(CN(CC(C)([N+](=O)[O-])[N+](=O)[O-])N=O)([N+](=O)[O-])[N+](=O)[O-]	-81.5
1435	10424-38-1	CC(CN)N	-53.68
1436	1924-47-6	CC(CNCC(C)([N+](=O)[O-])[N+](=O)[O-])([N+](=O)[O-])[N+](=O)[O-]	-160
1437	57-55-6	CC(CO)O	-429.8
1438	1717-00-6	CC(F)(Cl)Cl	-339.7
1439	75-68-3	CC(F)(F)Cl	-529.7
1440	420-46-2	CC(F)(F)F	-748.7
1441	420-47-3	CC(F)(F)I	-474.3
1442	1615-75-4	CC(F)Cl	-313.4
1443	75-37-6	CC(F)F	-497
1444	18871-66-4	CC(N(C)C)(OC)OC	-387
1445	56522-42-0	CC(N=[N+]=[N-])([N+](=O)[O-])[N+](=O)[O-]	263.006
1446	542-10-9	CC(OC(=O)C)OC(=O)C	-812.6
1447	1445-45-0	CC(OC)(OC)OC	-570.86
1448	1538-87-0	CC(OC)Cl	-273
1449	75245-21-5	CC/C(=C(/CC)\C(C)(C)C)/C(C)(C)C	-168.3
1450	24410-84-2	CC/C=C/C(=O)OCC	-394.5
1451	111895-49-9	CC/C=C/S(=O)(=O)C1=CC=C(C=C1)C	-230
1452	930-90-5	CC[C@@H]1CCC[C@H]1C	-156.2
1453	85688-81-9	CC[C@](C)(C#N)[C@@](C)(CC)C#N	64.06
1454	73-32-5	CC[C@H](C)[C@@H](C(=O)O)N	-496.7
1455	624-79-3	CC[N+]#[C-]	132.6
1456	79-24-3	CC[N+](=O)[O-]	-102.5
1457	115-07-1	CC=C	20.1
1458	513-35-9	CC=C(C)C	-41.6
1459	21451-76-3	CC=C(C)O	-213
1460	95540-87-7	CC=C(C=C)C=C	159
1461	590-19-2	CC=C=C	162.25
1462	59660-64-9	CC=C=C=CC	265
1463	591-96-8	CC=C=CC	133.05
1464	3839-50-7	CC=C1C=CC=C1	185
1465	2146-37-4	CC=C1CCCC1	-18.1
1466	1003-64-1	CC=C1CCCCC1	-59.5
1467	590-15-8	CC=CBr	42.35
1468	624-64-6	CC=CC	-9.2
1469	1574-40-9	CC=CC#C	258.5
1470	1190-76-7	CC=CC#N	137.35
1471	625-33-2	CC=CC(=O)C	-136
1472	25415-77-4	CC=CC(=O)OCCC(C)C	-447
1473	691-38-3	CC=CC(C)C	-59.55
1474	2004-70-8	CC=CC=C	79
1475	5194-50-3	CC=CC=CC	48
1476	873-66-5	CC=Cc1ccccc1	119.3
1477	62030-42-6	CC=CCC(=O)OCC(C)C	-453
1478	7319-00-8	CC=CCC=C	75.5
1479	4894-61-5	CC=CCCl	-41.97
1480	16136-85-9	CC=CCl	-10.533
1481	20327-65-5	CC=CF	-174.5
1482	7796-54-5	CC=CI	89.75
1483	57642-96-3	CC=CO	-171.5
1484	20729-41-3	CC=N	24
1485	107-29-9	CC=NO	-22.55
1486	75-07-0	CC=O	-165.3
1487	6851-93-0	CC=S	50
1488	933-52-8	CC1(C(=O)C(C1=O)(C)C)C	-307.7
1489	54166-22-2	CC1(C(N=N1)(C)C)C	150.3
1490	111869-26-2	CC1(C=C2CCC2=C1)C	236
1491	4125-18-2	CC1(C=CC=C1)C	86.6
1492	38748-97-9	CC1(C2C1CC(CC2)(C)O)C	-254.5
1493	21218-11-1	CC1(C2C1CC3(C(C2)O3)C)C	-102.5
1494	19740-34-2	CC1(C2CC3CC(C2)CC1C3)C	-182.85
1495	127-91-3	CC1(C2CCC(=C)C1C2)C	38.7
1496	79-92-5	CC1(C2CCC(C2)C1=C)C	-28.3
1497	76-22-2	CC1(C2CCC1(C(=O)C2)C)C	-267
1498	15300-82-0	CC1(c2ccccc2-c3c1cccc3)C4(c5ccccc5-c6c4cccc6)C	323.9
1499	126-81-8	CC1(CC(=O)CC(=O)C1)C	-383.6
1500	826-36-8	CC1(CC(=O)CC(N1)(C)C)C	-273.5
1501	3637-11-4	CC1(CC(=O)CC(N1O)(C)C)C	-298.1
1502	22842-41-7	CC1(CC(=O)CC(S1)(C)C)C	-291
1503	3637-10-3	CC1(CC(CC(N1O)(C)C)O)C	-345.3
1504	2721-31-5	CC1(CC(N=N1)(C)C)C	39
1505	1630-94-0	CC1(CC1)C	-8.2
1506	54143-34-9	CC1(CCC([N+](=N1)[O-])(C)C)C	-26.5
1507	562-46-9	CC1(CCC(=O)CC1=O)C	-400.4
1508	19403-24-8	CC1(CCC(N=N1)(C)C)C	41.8
1509	4912-92-9	CC1(CCC2=CC=CC=C21)C	-1.75
1510	768-66-1	CC1(CCCC(N1)(C)C)C	-159.9
1511	1638-26-2	CC1(CCCC1)C	-138.25
1512	1462-03-9	CC1(CCCC1)O	-284.3
1513	590-66-9	CC1(CCCCC1)C	-180.8
1514	5406-58-6	CC1(COC(OC1)(C)C2=CC=CC=C2)C	-350.68
1515	776-88-5	CC1(COC(OC1)C2=CC=CC=C2)C	-311.6
1516	6921-35-3	CC1(COC1)C	-148.2
1517	1955-45-9	CC1(COC1=O)C	-352.7
1518	872-98-0	CC1(COCOC1)C	-420.3
1519	4222-23-5	CC1(N=N1)Br	291
1520	4222-21-3	CC1(N=N1)Cl	233
1521	28873-61-2	CC1(N=NC(=O)O1)C	-200
1522	39239-96-8	CC1(OCCCO1)C(C)(C)O	-642
1523	3674-77-9	CC1(OCCO1)C2=CC=CC=C2	-261.9
1524	13297-17-1	CC1=C([N+](=O)C2=CC=CC=C2N1[O-])C(=O)C	33.1
1525	40016-70-4	CC1=C([N+](=O)C2=CC=CC=C2N1[O-])C(=O)OC	-148.7
1526	602-96-0	CC1=C(C(=C(C(=C1[N+](=O)[O-])C)[N+](=O)[O-])C)[N+](=O)[O-]	-12.1
1527	2243-32-5	CC1=C(C(=C(C(=C1C)C)C(=O)O)C)C	-422.9
1528	87-85-4	CC1=C(C(=C(C(=C1C)C)C)C)C	-76.7
1529	771-56-2	CC1=C(C(=C(C(=C1F)F)F)F)F	-843.3
1530	1076-47-7	CC1=C(C(=C(C=C1)C(=O)O)C)C	-377.3
1531	490-06-2	CC1=C(C(=C(C=C1)C(C)C)O)O	-379.1
1532	2529-36-4	CC1=C(C(=C(C=C1)C)C(=O)O)C	-371.2
1533	488-23-3	CC1=C(C(=C(C=C1)C)C)C	-35.7
1534	76089-59-3	CC1=C(C(=C)C(=C1C)C)C	83.3
1535	603-79-2	CC1=C(C(=CC=C1)C(=O)O)C	-345.8
1536	13117-94-7	CC1=C(C(=CC=C1)C(C)(C)C)N	-44.8
1537	3228-04-4	CC1=C(C(=CC=C1)C(C)C)O	-190
1538	81-20-9	CC1=C(C(=CC=C1)C)[N+](=O)[O-]	8.7885
1539	526-73-8	CC1=C(C(=CC=C1)C)C	-9.35
1540	6575-13-9	CC1=C(C(=CC=C1)C)C#N	146.2
1541	632-46-2	CC1=C(C(=CC=C1)C)C(=O)O	-341.6
1542	19519-71-2	CC1=C(C(=CC=C1)C)N=O	139.8
1543	576-26-1	CC1=C(C(=CC=C1)C)O	-157.5
1544	526-75-0	CC1=C(C(=CC=C1)O)C	-157.3
1545	3228-01-1	CC1=C(C(=CC=C1)O)C(C)C	-172
1546	488-17-5	CC1=C(C(=CC=C1)O)O	-299.3
1547	121-14-2	CC1=C(C=C(C=C1)[N+](=O)[O-])[N+](=O)[O-]	33.187
1548	5428-54-6	CC1=C(C=C(C=C1)[N+](=O)[O-])O	-147.2
1549	619-04-5	CC1=C(C=C(C=C1)C(=O)O)C	-362.4
1550	499-75-2	CC1=C(C=C(C=C1)C(C)C)O	-194.2
1551	95-65-8	CC1=C(C=C(C=C1)O)C	-156.6
1552	4371-46-4	CC1=C(C=C(C=C1)O)C(C)C	-185.1
1553	118-96-7	CC1=C(C=C(C=C1[N+](=O)[O-])[N+](=O)[O-])[N+](=O)[O-]	51.4632
1554	15269-17-7	CC1=C(C=C(C=C1C(C)C)O)C(C)C	-257
1555	22292-76-8	CC1=C(C=C(C=C1O)C(C)C)C(C)C	-259
1556	1740-97-2	CC1=C(C=CC(=C1)C(C)C)O	-206.8
1557	51488-20-1	CC1=C(C=CC(=C1)N=C=O)Cl	-77
1558	2581-34-2	CC1=C(C=CC(=C1)O)[N+](=O)[O-]	-138.5
1559	3228-02-2	CC1=C(C=CC(=C1)O)C(C)C	-184
1560	606-20-2	CC1=C(C=CC=C1[N+](=O)[O-])[N+](=O)[O-]	45
1561	4371-48-6	CC1=C(C=CC=C1O)C(C)C	-182.6
1562	1121-25-1	CC1=C(C=CC=N1)O	-84.5
1563	583-58-4	CC1=C(C=NC=C1)C	70
1564	7343-06-8	CC1=C(C2=C(C=C1)C=CC3=C2C(=C(C=C3)C)C)C	158.45
1565	3697-27-6	CC1=C(C2=C(C=CC3=CC=CC=C32)C4=CC=CC=C14)C	262.2
1566	604-83-1	CC1=C(C2=CC=CC=C2C3=CC=CC=C13)C	167.05
1567	69155-29-9	CC1=C(CC(C(C1)(C#N)C#N)(C#N)C#N)C	580.3
1568	765-47-9	CC1=C(CCC1)C	-41.4
1569	1124-11-4	CC1=C(N=C(C(=N1)C)C)C	54.7
1570	583-61-9	CC1=C(N=CC=C1)C	68.3
1571	10435-68-4	CC1=C(OC2=CC3=CC=CC=C3C2=C1C)C	2
1572	10557-82-1	CC1=C(ON=C1C)C	-20
1573	19947-75-2	CC1=C(ON=C1C)N	5.2
1574	554-61-0	CC1=C[C@@H]2[C@@H](C2(C)C)CC1	25
1575	6639-86-7	CC1=C[N+](=O)C2=CC=CC=C2N1[O-]	169.9
1576	2717-39-7	CC1=C2C(=CC=C(C2=C(C=C1)C)C)C	81.6
1577	611-32-5	CC1=C2C(=CC=C1)C=CC=N2	167.7
1578	3674-69-9	CC1=C2C(=CC=C1)C=CC3=CC=CC(=C32)C	193.6
1579	832-64-4	CC1=C2C(=CC=C1)C=CC3=CC=CC=C32	195.8
1580	313-74-6	CC1=C2C(=CC=C1)C=CC3=CC4=CC=CC=C4C(=C32)C	251.5
1581	569-41-5	CC1=C2C(=CC=CC2=CC=C1)C	108.75
1582	57-97-6	CC1=C2C=CC3=CC=CC=C3C2=C(C4=CC=CC=C14)C	277.7
1583	1078-04-2	CC1=C2CCC(C2=C(C=C1)C)(C)C	-62.5
1584	6682-71-9	CC1=C2CCCC2=C(C=C1)C	-7.4
1585	2437-66-3	CC1=CC(=C(C(=C1)C(=O)O)C)C	-382.2
1586	128-37-0	CC1=CC(=C(C(=C1)C(C)(C)C)O)C(C)(C)C	-296.9
1587	603-71-4	CC1=CC(=C(C(=C1)C)[N+](=O)[O-])C	-26.8
1588	2904-57-6	CC1=CC(=C(C(=C1)C)C#[N+][O-])C	137
1589	2571-52-0	CC1=CC(=C(C(=C1)C)C#N)C	106.4
1590	1667-01-2	CC1=CC(=C(C(=C1)C)C(=O)C)C	-205
1591	480-63-7	CC1=CC(=C(C(=C1)C)C(=O)O)C	-374.2
1592	527-53-7	CC1=CC(=C(C(=C1)C)C)C	-41.9
1593	1196-12-9	CC1=CC(=C(C(=C1)C)N=O)C	107.4
1594	527-60-6	CC1=CC(=C(C(=C1)C)O)C	-263.7
1595	2604-45-7	CC1=CC(=C(C(=C1C)C(=O)O)C)C	-400.1
1596	2408-38-0	CC1=CC(=C(C(=C1C)C)C(=O)O)C	-398.1
1597	700-12-9	CC1=CC(=C(C(=C1C)C)C)C	-70.15
1598	2529-39-7	CC1=CC(=C(C(=C1C)C)C)C(=O)O	-398.7
1599	700-38-9	CC1=CC(=C(C=C1)[N+](=O)[O-])O	-161.1
1600	611-01-8	CC1=CC(=C(C=C1)C(=O)O)C	-355
1601	89-83-8	CC1=CC(=C(C=C1)C(C)C)O	-184.6
1602	95-63-6	CC1=CC(=C(C=C1)C)C	-13.5
1603	610-72-0	CC1=CC(=C(C=C1)C)C(=O)O	-351.1
1604	95-87-4	CC1=CC(=C(C=C1)C)O	-161.7
1605	105-67-9	CC1=CC(=C(C=C1)O)C	-163
1606	4427-56-9	CC1=CC(=C(C=C1)O)C(C)C	-198.4
1607	452-86-8	CC1=CC(=C(C=C1)O)O	-298.4
1608	93-51-6	CC1=CC(=C(C=C1)O)OC	-291.9
1609	15269-16-6	CC1=CC(=C(C=C1C(C)C)O)C(C)C	-259.9
1610	2040-07-5	CC1=CC(=C(C=C1C)C(=O)C)C	-189
1611	528-90-5	CC1=CC(=C(C=C1C)C(=O)O)C	-386.2
1612	10222-95-4	CC1=CC(=C(C=C1C)C(C)C)C	-103.3
1613	95-93-2	CC1=CC(=C(C=C1C)C)C	-47.55
1614	7396-38-5	CC1=CC(=C2C(=C1)C=CC3=CC(=CC(=C32)C)C)C	128.2
1615	941-60-6	CC1=CC(=C2CCC(C2=C1)(C)C)C	-70.45
1616	1685-82-1	CC1=CC(=C2CCCC2=C1)C	-5.8
1617	499-06-9	CC1=CC(=CC(=C1)C(=O)O)C	-364.5
1618	98-19-1	CC1=CC(=CC(=C1)C(C)(C)C)C	-89.8
1619	15181-11-0	CC1=CC(=CC(=C1)C(C)(C)C)C(C)(C)C	-163
1620	108-68-9	CC1=CC(=CC(=C1)O)C	-161.6
1621	3228-03-3	CC1=CC(=CC(=C1)O)C(C)C	-210.1
1622	1076-88-6	CC1=CC(=CC(=C1C)C)C(=O)O	-389.8
1623	879-97-0	CC1=CC(=CC(=C1O)C)C(C)(C)C	-243.2
1624	99-08-1	CC1=CC(=CC=C1)[N+](=O)[O-]	25.1
1625	108-38-3	CC1=CC(=CC=C1)C	17.25
1626	99-04-7	CC1=CC(=CC=C1)C(=O)O	-327.9
1627	1075-38-3	CC1=CC(=CC=C1)C(C)(C)C	-59.8
1628	535-77-3	CC1=CC(=CC=C1)C(C)C	-30.6
1629	643-93-6	CC1=CC(=CC=C1)C2=CC=CC=C2	152.5
1630	625-95-6	CC1=CC(=CC=C1)I	133
1631	108-44-1	CC1=CC(=CC=C1)N	61.1
1632	121-72-2	CC1=CC(=CC=C1)N(C)C	72.6
1633	108-39-4	CC1=CC(=CC=C1)O	-133.6
1634	591-22-0	CC1=CC(=CN=C1)C	72.8
1635	108-47-4	CC1=CC(=NC=C1)C	63.9
1636	1134-35-6	CC1=CC(=NC=C1)C2=NC=CC(=C2)C	209.3
1637	300-87-8	CC1=CC(=NO1)C	-18
1638	1008-74-8	CC1=CC(=NO1)C2=CC=CC=C2	98.7
1639	1072-67-9	CC1=CC(=NO1)N	20
1640	18615-86-6	CC1=CC(=O)C=CN1	-71.7
1641	607-67-0	CC1=CC(=O)C2=CC=CC=C2N1	-23.3
1642	84909-43-3	CC1=CC(=O)NC2=CC=CC=C12	-61
1643	99-99-0	CC1=CC=C(C=C1)[N+](=O)[O-]	30.8853
1644	874-60-2	CC1=CC=C(C=C1)C(=O)Cl	-139.7
1645	14062-78-3	CC1=CC=C(C=C1)C(=O)N(C)C	-113
1646	99-94-5	CC1=CC=C(C=C1)C(=O)O	-330.4
1647	99-75-2	CC1=CC=C(C=C1)C(=O)OC	-312.1
1648	98-51-1	CC1=CC=C(C=C1)C(C)(C)C	-57
1649	613-33-2	CC1=CC=C(C=C1)C2=CC=C(C=C2)C	111.3
1650	644-08-6	CC1=CC=C(C=C1)C2=CC=CC=C2	138.2
1651	352-32-9	CC1=CC=C(C=C1)F	-147.5
1652	624-31-7	CC1=CC=C(C=C1)I	122
1653	106-49-0	CC1=CC=C(C=C1)N	41.8
1654	99-97-8	CC1=CC=C(C=C1)N(C)C	68.9
1655	106-44-5	CC1=CC=C(C=C1)O	-125.3
1656	3185-99-7	CC1=CC=C(C=C1)S(=O)(=O)C	-273.1
1657	67605-02-1	CC1=CC=C(C=C1)S(=O)(=O)C(=C)C	-197
1658	5535-52-4	CC1=CC=C(C=C1)S(=O)(=O)C=C	-162
1659	16192-03-3	CC1=CC=C(C=C1)S(=O)(=O)C=C(C)C	-240
1660	16192-08-8	CC1=CC=C(C=C1)S(=O)(=O)C=C=C	-32
1661	599-66-6	CC1=CC=C(C=C1)S(=O)(=O)C2=CC=C(C=C2)C	-202
1662	16192-07-7	CC1=CC=C(C=C1)S(=O)(=O)CC#C	0.8
1663	16192-04-4	CC1=CC=C(C=C1)S(=O)(=O)CC(=C)C	-241
1664	3112-87-6	CC1=CC=C(C=C1)S(=O)(=O)CC=C	-203
1665	17482-19-8	CC1=CC=C(C=C1)S(=O)(=O)CCC=C	-226
1666	99-86-5	CC1=CC=C(CC1)C(C)C	-20.6
1667	625-84-3	CC1=CC=C(N1)C	39.7
1668	930-87-0	CC1=CC=C(N1C)C	34.6
1669	625-86-5	CC1=CC=C(O1)C	-120.2
1670	3279-76-3	CC1=CC=CC(=O)N1	-120.3
1671	88-72-2	CC1=CC=CC=C1[N+](=O)[O-]	37.3
1672	118-90-1	CC1=CC=CC=C1C(=O)O	-320.6
1673	1074-92-6	CC1=CC=CC=C1C(C)(C)C	-33
1674	643-58-3	CC1=CC=CC=C1C2=CC=CC=C2	152.8
1675	27546-46-9	CC1=CC=CC=C1C2CC2	125.5
1676	615-37-2	CC1=CC=CC=C1I	133
1677	95-53-4	CC1=CC=CC=C1N	53.2
1678	90-12-0	CC1=CC=CC2=CC=CC=C12	116.9
1679	108-89-4	CC1=CC=NC=C1	103.8
1680	491-35-0	CC1=CC=NC2=CC=CC=C12	162.1
1681	5765-44-6	CC1=CC=NO1	34.1
1682	3100-04-7	CC1=CC1	243.6
1683	581-42-0	CC1=CC2=C(C=C1)C=C(C=C2)C	78.7
1684	582-16-1	CC1=CC2=C(C=C1)C=CC(=C2)C	79.5
1685	93-37-8	CC1=CC2=C(C=C1)C=CC(=N2)C	121.8
1686	1576-69-8	CC1=CC2=C(C=C1)C3=C(C=C2)C=C(C=C3)C	143.05
1687	316-51-8	CC1=CC2=C(C=C1)C3=CC4=C(C=C(C=C4)C)C=C3C=C2	188.85
1688	877-43-0	CC1=CC2=C(C=C1)N=C(C=C2)C	120.9
1689	91-62-3	CC1=CC2=C(C=C1)N=CC=C2	161
1690	581-40-8	CC1=CC2=CC=CC=C2C=C1C	78
1691	19164-41-1	CC1=CC2=NO[N+](=C2C=C1)[O-]	267.4
1692	4893-13-4	CC1=CC2CCC1CC2	-18.6
1693	99-83-2	CC1=CCC(C=C1)C(C)C	-9.3
1694	5989-27-5	CC1=CCC(CC1)C(=C)C	-4.5
1695	5502-88-5	CC1=CCC(CC1)C(C)C	-110.8
1696	13466-78-9	CC1=CCC2C(C1)C2(C)C	19
1697	80-56-8	CC1=CCC2CC1C2(C)C	28.3
1698	693-89-0	CC1=CCCC1	-3.8
1699	591-49-1	CC1=CCCCC1	-62.275
1700	1487-15-6	CC1=CCCO1	-122.6
1701	1193-10-8	CC1=CCS(=O)(=O)C1	-291.6
1702	14667-55-1	CC1=CN=C(C(=N1)C)C	74.3
1703	589-93-5	CC1=CN=C(C=C1)C	66.4
1704	108-99-6	CC1=CN=CC=C1	103.6
1705	65-71-4	CC1=CNC(=O)NC1=O	-328.7
1706	616-44-4	CC1=CSC=C1	82.59
1707	693-95-8	CC1=CSC=N1	111.8
1708	108-48-5	CC1=NC(=CC=C1)C	58.7
1709	1121-78-4	CC1=NC=C(C=C1)O	-69.8
1710	5910-89-4	CC1=NC=CN=C1C	126
1711	693-98-1	CC1=NC=CN1	89.8
1712	826-81-3	CC1=NC2=C(C=CC=C2O)C=C1	-39.4
1713	91-63-4	CC1=NC2=CC=CC=C2C=C1	159.1
1714	2379-55-7	CC1=NC2=CC=CC=C2N=C1C	172.9
1715	1120-64-5	CC1=NCCO1	-130.5
1716	4135-93-7	CC1=NN(N=N1)C	251.2
1717	5144-11-6	CC1=NN=NN1C	273.2
1718	932-53-6	CC1=NNC(=O)NC1=O	-215.8
1719	615-76-9	CC1=NNC(=S)NC1=O	30.4
1720	4076-36-2	CC1=NNN=N1	280.7
1721	2518-42-5	CC1=NO[N+](=C1C)[O-]	102
1722	1008-75-9	CC1=NOC(=C1)C2=CC=CC=C2	103
1723	30842-90-1	CC1=NOC=C1	35.6
1724	4975-21-7	CC1=NON=C1C	107
1725	1687-36-1	CC12CC3(CC(C1)(CC(C2)(C3)C)C)C	-284
1726	7000-79-5	CC12CC3(SC(S1)(CC(S2)(S3)C)C)C	-37
1727	30545-28-9	CC12CC3C4CC5CC3C(C1)C(C5)C4C2	-157.3
1728	707-35-7	CC12CC3CC(C1)(CC(C3)(C2)C)C	-254.75
1729	702-79-4	CC12CC3CC(C1)CC(C3)(C2)C	-218.7
1730	768-91-2	CC12CC3CC(C1)CC(C3)C2	-171.65
1731	26460-76-4	CC12CC3CC4C1CC5CC4C(C3)C2C5	-166.7
1732	20454-81-3	CC12CCC(C1)(CC2)C	-128.4
1733	59348-18-4	CC12CCC(C1)CC2=O	-204.4
1734	49570-30-1	CC12CCC(CC1)(N=N2)C	92.4
1735	4625-24-5	CC12CCCC1C2	1.6
1736	2439-79-4	CC12CCCCC1C2	-20.8
1737	27761-61-1	CC12COC(OC1)(OC2)C	-560.16
1738	766-32-5	CC12COC(OC1)OC2	-506.8
1739	4045-44-7	CC1C(=C(C(=C1C)C)C)C	-25
1740	20558-16-1	CC1C(C2CCC1C2)C	-107.55
1741	30583-33-6	Cc1c(cc(cc1Cl)Cl)Cl	12.5
1742	13358-02-6	CC1C=CCC(C1(C#N)C#N)(C#N)C#N	596.7
1743	6007-71-2	CC1C=CCS1(=O)=O	-299.2
1744	2523-37-7	CC1C2=CC=CC=C2C3=CC=CC=C13	148
1745	22339-21-5	CC1C2CC(C2(C)C)CC1=O	-151
1746	24041-60-9	CC1C2CC(C2(C)C)CC1O	-185
1747	28375-86-2	CC1C2CC3C4CC5CC3C1C(C5)C4C2	-182.1
1748	700-56-1	CC1C2CC3CC(C2)CC1C3	-151.85
1749	114718-69-3	CC1C2CCC(C1C#N)C=C2	132.5
1750	108-67-8	Cc1cc(cc(c1)C)C	-16.2
1751	1795-27-3	CC1CC(CC(C1)C)C	-210.175
1752	17227-17-7	CC1CC(OC(O1)(C)C)C	-490.4
1753	36402-73-0	CC1CC(OC(O1)C)C	-447
1754	1759-81-5	CC1CC=CC1	14.8
1755	54750-09-3	CC1CC2C(C2(C)C)CC1O	-234.1
1756	14803-42-0	CC1CC2CCC1C=C2	-4.05
1757	500-00-5	CC1CCC(=CC1)C(C)C	-111.2
1758	108-29-2	CC1CCC(=O)O1	-406.5
1759	2532-58-3	CC1CCC(C1)C	-134.7
1760	106-42-3	Cc1ccc(cc1)C	17.7
1761	2207-04-7	CC1CCC(CC1)C	-180.5
1762	99-87-6	Cc1ccc(cc1)C(C)C	-29.8
1763	99-82-1	CC1CCC(CC1)C(C)C	-230.8
1764	16212-08-1	Cc1ccc(cc1)S(=O)(=O)C=Cc1ccccc1	-64.7
1765	1120-62-3	CC1CCC=C1	8.535
1766	18968-23-5	CC1CCC2C(C1)C2(C)C	-70.95
1767	56160-71-5	CC1CCC2N1C(CC2)C	-66.7
1768	638-04-0	CC1CCCC(C1)C	-180.55
1769	2158-55-6	CC1CCCC(CC1)(C)C	-210.3
1770	96-37-7	CC1CCCC1	-106.1
1771	822-50-4	CC1CCCC1C	-133.075
1772	108-88-3	Cc1ccccc1	50.3
1773	108-87-2	CC1CCCCC1	-154.7
1774	6876-23-9	CC1CCCCC1C	-175.95
1775	95-47-6	Cc1ccccc1C	19.05
1776	95-48-7	Cc1ccccc1O	-128.3
1777	7443-70-1	CC1CCCCC1O	-300.7
1778	109-06-8	Cc1ccccn1	-26.5
1779	109-05-7	CC1CCCCN1	-84.5
1780	554-14-3	Cc1cccs1	84.35
1781	1795-09-1	CC1CCCS1	-63.89
1782	1120-97-4	CC1CCOCO1	-376.9
1783	4740-00-5	CC1CCSC1	-60.54
1784	75-56-9	CC1CO1	-94.68
1785	108-32-7	CC1COC(=O)O1	-563.7
1786	1121-20-6	CC1COCOC1C	-411
1787	123-63-7	CC1OC(OC(O1)C)C	-636
1788	14738-97-7	CC1OC=C(O1)C	-423
1789	14738-99-9	CC1OCC(=C)O1	-383
1790	626-68-6	CC1OCCCO1	-397.5
1791	497-26-7	CC1OCCO1	-350
1792	74-96-4	CCBr	-63.6
1793	74-98-6	CCC	-104.7
1794	107-00-6	CCC#C	165.2
1795	627-21-4	CCC#CC	128.9
1796	55314-57-3	CCC#CC(=O)OCC	-250
1797	622-76-4	CCC#CC1=CC=CC=C1	248.6
1798	928-49-4	CCC#CCC	105.4
1799	107-12-0	CCC#N	51.46
1800	5437-63-8	CCC([N+](=O)[O-])([N+](=O)[O-])[N+](=O)[O-]	-69.7
1801	595-44-8	CCC([N+](=O)[O-])(Cl)Cl	-168
1802	601-76-3	CCC([N+](=O)[O-])[N+](=O)[O-]	-109.2
1803	563-46-2	CCC(=C)C	-35.15
1804	3586-58-1	CCC(=C)C(=O)O	-393.3
1805	7357-93-9	CCC(=C)C(C)C	-79.6
1806	3404-63-5	CCC(=C)C=C	63.6
1807	922-63-4	CCC(=C)C=O	-131.2
1808	760-21-4	CCC(=C)CC	-56.05
1809	2211-70-3	CCC(=C)Cl	-29.3
1810	922-62-3	CCC(=CC)C	-62.7
1811	78-93-3	CCC(=O)C	-238.9
1812	564-04-5	CCC(=O)C(C)(C)C	-313.8
1813	565-69-5	CCC(=O)C(C)C	-286.1
1814	96-22-0	CCC(=O)CC	-253.4
1815	20734-29-6	CCC(=O)CC(=O)C(C)(C)C	-470.9
1816	7424-54-6	CCC(=O)CC(=O)CC	-438.9
1817	79-05-0	CCC(=O)N	-258.94
1818	758-96-3	CCC(=O)N(C)C	-250.2
1819	79-09-4	CCC(=O)O	-456.3
1820	105-37-3	CCC(=O)OCC	-463.6
1821	54078-53-4	CCC(=O)OCOCC	-617.4
1822	1540-34-7	CCC(C(=O)C)C(=O)C	-439.7
1823	601-75-2	CCC(C(=O)O)C(=O)O	-849.8
1824	22710-13-0	CCC(C(=O)OCC(C)C)Cl	-609.2
1825	1068-87-7	CCC(C(C)C)C(C)C	-227.4
1826	565-67-3	CCC(C(C)C)O	-338.9
1827	50341-35-0	CCC(C)(Br)Br	-91.46
1828	75-83-2	CCC(C)(C)C	-186.05
1829	20669-04-9	CCC(C)(C)C(=O)C	-303.8
1830	7154-79-2	CCC(C)(C)C(C)(C)C	-236.95
1831	560-21-4	CCC(C)(C)C(C)C	-216.05
1832	85688-95-5	CCC(C)(C)C(CC)(C#N)C#N	61.3
1833	3404-73-7	CCC(C)(C)C=C	-78.5
1834	2049-95-8	CCC(C)(C)C1=CC=CC=C1	-40.7
1835	562-49-2	CCC(C)(C)CC	-201.25
1836	61868-61-9	CCC(C)(C)CC(C)(C)CC	-276.7
1837	16747-30-1	CCC(C)(C)CC(C)C	-239.9
1838	61868-47-1	CCC(C)(C)CCC(C)(C)C	-302.4
1839	62199-46-6	CCC(C)(C)CCC(C)(C)CC	-318.2
1840	75-85-4	CCC(C)(C)O	-329.3
1841	994-05-8	CCC(C)(C)OC	-306.5
1842	625-16-1	CCC(C)(C)OC(=O)C	-539.1
1843	919-94-8	CCC(C)(C)OCC	-334.8
1844	5156-41-2	CCC(C)(C)ON=O	-192
1845	51452-08-5	CCC(C)(C)OOCCO	-464.1
1846	1679-09-0	CCC(C)(C)S	-126.9
1847	1067-08-9	CCC(C)(CC)CC	-214.85
1848	74286-94-5	CCC(C)(CC)CC(C)(CC)CC	-301.3
1849	77-74-7	CCC(C)(CC)O	-348.3
1850	600-24-8	CCC(C)[N+](=O)[O-]	-163.7
1851	78-76-2	CCC(C)Br	-120
1852	78-78-4	CCC(C)C	-153.65
1853	18936-17-9	CCC(C)C#N	2.4
1854	3404-72-6	CCC(C)C(=C)C	-90.2
1855	565-61-7	CCC(C)C(=O)C	-284.1
1856	116-53-0	CCC(C)C(=O)O	-495.4
1857	868-57-5	CCC(C)C(=O)OC	-492.5
1858	7452-79-1	CCC(C)C(=O)OCC	-516.4
1859	564-02-3	CCC(C)C(C)(C)C	-219.6
1860	565-59-3	CCC(C)C(C)C	-198.25
1861	583-48-2	CCC(C)C(C)CC	-212.8
1862	85668-74-2	CCC(C)C(C1=CC=C(C=C1)C(C)(C)C)C(CC)(CC)C2=CC=C(C=C2)C(C)(C)C	-170
1863	760-20-3	CCC(C)C=C	-48.25
1864	14255-23-3	CCC(C)C=C(C)C	-104.9
1865	99-71-8	CCC(C)C1=CC=C(C=C1)O	-190.3
1866	135-98-8	CCC(C)C1=CC=CC=C1	-18.4
1867	89-72-5	CCC(C)C1=CC=CC=C1O	-191.4
1868	96-14-0	CCC(C)CC	-172
1869	105-42-0	CCC(C)CC(=O)C	-305.6
1870	16747-26-5	CCC(C)CC(C)(C)C	-243.1
1871	589-43-5	CCC(C)CC(C)C	-219.2
1872	78-86-4	CCC(C)Cl	-166.66
1873	137-32-6	CCC(C)CO	-299.3
1874	1878-18-8	CCC(C)CS	-114.7
1875	13952-84-6	CCC(C)N	-106
1876	689-11-2	CCC(C)NC(=O)N	-307
1877	626-23-3	CCC(C)NC(C)CC	-183.6
1878	78-92-2	CCC(C)O	-290.55
1879	44917-51-3	CCC(C)OC(=O)/C=C/C	-425
1880	32970-45-9	CCC(C)OC(C)(C)C	-380
1881	6863-58-7	CCC(C)OC(C)CC	-361
1882	924-43-6	CCC(C)ON=O	-153
1883	513-53-1	CCC(C)S	-96.11
1884	37850-75-2	CCC(C)SCC=C	-46
1885	533-98-2	CCC(CBr)Br	-92.93
1886	125379-19-3	CCC(CC)(C(CC)(CC)OC)OC	-512
1887	204189-06-0	CCC(CC)(c1ccc(cc1)[N+](=O)[O-])[N+](=O)[O-]	-84.5
1888	5171-86-8	CCC(CC)(CC)C(CC)(CC)CC	-264.3
1889	1067-20-5	CCC(CC)(CC)CC	-232.9
1890	91633-36-2	CCC(CC)(CC)N=[N+]=[N-]	132.005
1891	19780-66-6	CCC(CC)C(=C)C	-100.4
1892	609-26-7	CCC(CC)C(C)C	-211.1
1893	4038-04-4	CCC(CC)C=C	-69.5
1894	617-78-7	CCC(CC)CC	-189.65
1895	584-02-1	CCC(CC)O	-317
1896	616-21-7	CCC(CCl)Cl	-191.2
1897	53161-72-1	CCC(CI)I	12.3
1898	4426-48-6	CCC(CN)N	-73.55
1899	108-03-2	CCC[N+](=O)[O-]	-124.3
1900	106-98-9	CCC=C	-0.25
1901	625-27-4	CCC=C(C)C	-64.8
1902	4914-89-0	CCC=C(C)CC	-78.225
1903	591-95-7	CCC=C=C	140.65
1904	627-20-3	CCC=CC	-29.7
1905	26294-98-4	CCC=CC#N	117.35
1906	20237-34-7	CCC=CC=C	56.5
1907	7642-09-3	CCC=CCC	-49.23
1908	7611-87-2	CCC=CCl	-17.85
1909	123-38-6	CCC=O	-191.8
1910	2177-22-2	CCC1(COC1)CCl	-193.3
1911	64711-83-7	CCC1=C(C=C(C=C1)N=C=O)N=C=O	-135
1912	1758-88-9	CCC1=C(C=CC(=C1)C)C	-32.4
1913	3854-90-8	CCC1=CC(=CC(=C1)C(=O)O)CC	-407.8
1914	934-74-7	CCC1=CC(=CC(=C1)C)C	-35.7
1915	619-20-5	CCC1=CC(=CC=C1)C(=O)O	-346.8
1916	141-93-5	CCC1=CC(=CC=C1)CC	-21.6
1917	620-17-7	CCC1=CC(=CC=C1)O	-146.2
1918	100-12-9	CCC1=CC=C(C=C1)[N+](=O)[O-]	7.4
1919	622-96-8	CCC1=CC=C(C=C1)C	-3.25
1920	619-64-7	CCC1=CC=C(C=C1)C(=O)O	-355.6
1921	105-05-5	CCC1=CC=C(C=C1)CC	-22.5
1922	123-07-9	CCC1=CC=C(C=C1)O	-144.3
1923	620-14-4	CCC1=CC=CC(=C1)C	-1.85
1924	612-22-6	CCC1=CC=CC=C1[N+](=O)[O-]	16.6
1925	611-14-3	CCC1=CC=CC=C1C	1.25
1926	612-19-1	CCC1=CC=CC=C1C(=O)O	-340.7
1927	135-01-3	CCC1=CC=CC=C1CC	-19.5
1928	90-00-6	CCC1=CC=CC=C1O	-145.2
1929	61886-71-3	CCC1=CC=CC2=CC=CC(=C21)C	98.1
1930	2146-38-5	CCC1=CCCC1	-22.4
1931	1453-24-3	CCC1=CCCCC1	-63.5
1932	104-90-5	CCC1=CN=C(C=C1)C	34.9
1933	1072-62-4	CCC1=NC=CN1	68.3
1934	10431-98-8	CCC1=NCCO1	-148.9
1935	71032-67-2	CCC1CC1CC	-46.85
1936	106623-85-2	CCC1CC2CCC1C=C2	-26.5
1937	694-35-9	CCC1CCC=C1	-12.4
1938	4806-61-5	CCC1CCC1	-27.6
1939	1640-89-7	CCC1CCCC1	-127
1940	100-41-4	CCc1ccccc1	29.4
1941	1678-91-7	CCC1CCCCC1	-172.05
1942	106-94-5	CCCBr	-82.93
1943	106-97-8	CCCC	-125.95
1944	627-19-0	CCCC#C	144.3
1945	764-35-2	CCCC#CC	107.7
1946	2586-89-2	CCCC#CCC	82.8
1947	1942-45-6	CCCC#CCCC	60.1
1948	109-74-0	CCCC#N	31.2
1949	7283-33-2	CCCC([N+](=O)[O-])([N+](=O)[O-])[N+](=O)[O-]	-93.8
1950	763-29-1	CCCC(=C)C	-59.45
1951	107-87-9	CCCC(=O)C	-259
1952	589-38-8	CCCC(=O)CC	-277.8
1953	123-19-3	CCCC(=O)CCC	-298.3
1954	541-35-5	CCCC(=O)N	-279.17
1955	760-79-2	CCCC(=O)N(C)C	-270.9
1956	107-92-6	CCCC(=O)O	-475.6
1957	819-97-6	CCCC(=O)OC(C)CC	-545.2
1958	1551-44-6	CCCC(=O)OC1CCCCC1	-545.7
1959	105-54-4	CCCC(=O)OCC	-484.6
1960	2050-00-2	CCCC(=O)OCC(C)(C)C	-574.7
1961	2461-40-7	CCCC(=O)OCC1CO1	-501.7
1962	19340-91-1	CCCC(C#N)N(CC)CC	-4.5
1963	1540-35-8	CCCC(C(=O)C)C(=O)C	-453.1
1964	162047-90-7	CCCC(C)(C#N)OC	-169.28
1965	590-35-2	CCCC(C)(C)C	-205.95
1966	20654-47-1	CCCC(C)(C)C#N	-45.78
1967	563-16-6	CCCC(C)(C)CC	-220
1968	74286-93-4	CCCC(C)(C)CC(C)(C)CCC	-313.2
1969	590-36-3	CCCC(C)(C)O	-354
1970	1633-97-2	CCCC(C)(C)S	-148
1971	74286-96-7	CCCC(C)(CC)CC(C)(CC)CCC	-347.1
1972	107-83-5	CCCC(C)C	-174.7
1973	16747-25-4	CCCC(C)C(C)(C)C	-241.4
1974	584-94-1	CCCC(C)C(C)C	-213.8
1975	3404-61-3	CCCC(C)C=C	-68.2
1976	78918-91-9	CCCC(C)CC	-191.55
1977	589-53-7	CCCC(C)CCC	-211.9
1978	6032-29-7	CCCC(C)O	-312.8
1979	85668-73-1	CCCC(CC)(C1=CC=C(C=C1)C(C)(C)C)C(CC)(CCC)C2=CC=C(C=C2)C(C)(C)C	-224
1980	4468-42-2	CCCC(CC)C1=CC=CC=C1	-80.2
1981	619-99-8	CCCC(CC)CC	-210.7
1982	623-37-0	CCCC(CC)O	-332.8
1983	85668-72-0	CCCC(CCC)(C1=CC=C(C=C1)C(C)(C)C)C(CCC)(CCC)C2=CC=C(C=C2)C(C)(C)C	-213
1984	589-55-9	CCCC(CCC)O	-354.8
1985	13279-85-1	CCCC(Cl)(Cl)Cl	-183.42
1986	5343-92-0	CCCC(CO)O	-465.1
1987	4461-87-4	CCCC(OC)OC	-426
1988	7207-51-4	CCCC/C(=N/O)/CCC	-181.1
1989	627-05-4	CCCC[N+](=O)[O-]	-144.8
1990	109-67-1	CCCC=C	-21.2
1991	2738-19-4	CCCC=C(C)C	-87.8
1992	4050-45-7	CCCC=CC	-51.85
1993	14686-14-7	CCCC=CCC	-71.3
1994	123-72-8	CCCC=O	-212.2
1995	2040-96-2	CCCC1CCCC1	-147.65
1996	103-65-1	CCCc1ccccc1	7.9
1997	1678-92-8	CCCC1CCCCC1	-192.35
1998	109-65-9	CCCCBr	-107
1999	109-66-0	CCCCC	-146.85
[truncated: 566 more rows]
